# Supplementary material for: Comparative Transcriptomics Reveal Metabolic Rather than Genetic Control of Divergent Antioxidant Metabolism in the Primary Root Elongation Zone of Water-Stressed Cotton and Maize
Source: MDPI journal article supplement (doi:10.3390/antiox12020287), 2023-01-27

**Figure S1.** Pipeline of procedures for comparative transcriptomic and orthologous analyses to identify key water stress-responsive DATs and orthologs in the cotton and maize primary root elongation zones. WW, well-watered; WS, water-stressed.

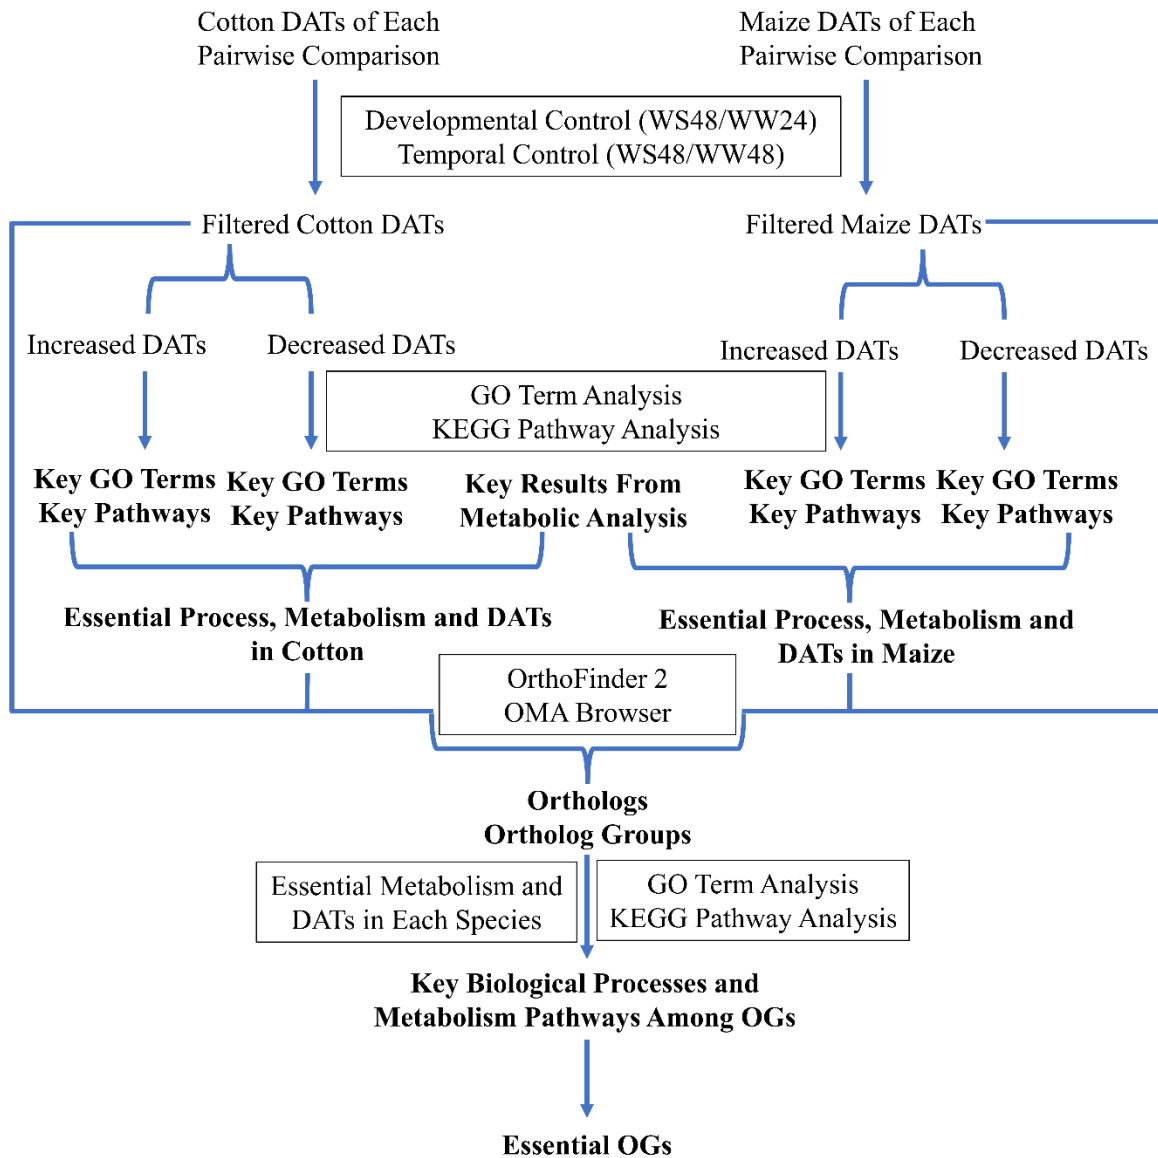

Supplement: s1 [file s1]
