# Supplementary material for: Comparative Transcriptomics Reveal Metabolic Rather than Genetic Control of Divergent Antioxidant Metabolism in the Primary Root Elongation Zone of Water-Stressed Cotton and Maize
Source: Antioxidants (Basel). 2023 Jan 27;12(2):287. doi: 10.3390/antiox12020287 (PMC9952253; doi:10.3390/antiox12020287)
Supplement: Supplementary file 1 [file antioxidants-12-00287-s001.zip]

Archive with 9 entries (9 files):
- Figure S1.pdf
- Supplementary Data S1.xlsx
- Table S1.xlsx
- Table S2.xlsx
- Table S3.xlsx
- Table S4.xlsx
- Table S5.xlsx
- Table S6.xlsx
- Table S7.xlsx
