# Supplementary material for: Comparative Transcriptomics Reveal Metabolic Rather than Genetic Control of Divergent Antioxidant Metabolism in the Primary Root Elongation Zone of Water-Stressed Cotton and Maize
Source: Antioxidants (Basel). 2023 Jan 27;12(2):287. doi: 10.3390/antiox12020287 (PMC9952253; doi:10.3390/antiox12020287)
Supplement: Supplementary file 1 [file antioxidants-12-00287-s001.zip › Supplementary Data S1.xlsx]

## Sheet: Cotton
Supplementary Data S1. Significant GO terms in the elongation zones of cotton and maize primary roots in response to water stress.
GO_acc	term_type	Term	queryitem	querytotal	bgitem	bgtotal	pvalue	FDR	-Log10FDR	entries
GO:0005975	Biological Process	carbohydrate metabolic process	101	1019	1714	41939	2.6e-15	3.2e-12	11.4949	// Gh_A02G1426 // Gh_A13G1960 // Gh_D05G1513 // Gh_D12G1978 // Gh_D03G1545 // Gh_D11G1628 // Gh_A03G1723 // Gh_A11G1910 // Gh_Sca004857G03 // Gh_A05G3256 // Gh_A08G0872 // Gh_A05G3413 // Gh_A03G0243 // Gh_D13G0639 // Gh_A08G1399 // Gh_A12G2148 // Gh_A10G1706 // Gh_A01G1778 // Gh_A05G2361 // Gh_A10G1705 // Gh_A12G1850 // Gh_D11G0237 // Gh_A11G3117 // Gh_D03G0401 // Gh_A07G0769 // Gh_A09G2413 // Gh…
GO:0044262		cellular carbohydrate metabolic process	36	1019	417	41939	3.8e-10	2.4e-07	6.61979	// Gh_A09G1690 // Gh_A03G1983 // Gh_A12G1807 // Gh_A02G1426 // Gh_A08G0195 // Gh_A13G0500 // Gh_D12G1978 // Gh_D03G1545 // Gh_A06G0716 // Gh_D11G1628 // Gh_D03G1637 // Gh_A03G1723 // Gh_A11G1910 // Gh_D01G1277 // Gh_Sca004857G03 // Gh_D08G0272 // Gh_D13G0639 // Gh_A05G1645 // Gh_A07G2133 // Gh_A06G0608 // Gh_A03G0243 // Gh_D07G0782 // Gh_D05G0363 // Gh_D11G0345 // Gh_D07G2342 // Gh_D08G1695 // Gh…
GO:0055114		oxidation-reduction process	132	1019	3350	41939	6e-08	2.5e-05	4.60206	// Gh_D10G1086 // Gh_A12G0056 // Gh_A07G0953 // Gh_A04G1453 // Gh_D08G2420 // Gh_D11G2151 // Gh_D10G1249 // Gh_A13G2341 // Gh_D10G1644 // Gh_A01G0506 // Gh_A03G1723 // Gh_A05G1645 // Gh_A09G1202 // Gh_D06G0864 // Gh_Sca004857G03 // Gh_A11G0905 // Gh_A06G0827 // Gh_D12G2438 // Gh_D06G0959 // Gh_D08G2256 // Gh_D09G1627 // Gh_A06G1604 // Gh_D12G0344 // Gh_D07G0019 // Gh_A08G1012 // Gh_A03G0492 // Gh…
GO:0005976		polysaccharide metabolic process	24	1019	291	41939	6.7e-07	0.00021	3.67778	// Gh_A13G0500 // Gh_A05G1645 // Gh_A02G1426 // Gh_A08G0195 // Gh_A09G1690 // Gh_D11G1628 // Gh_A03G1723 // Gh_A11G1910 // Gh_D10G1605 // Gh_D01G1277 // Gh_A03G0243 // Gh_D07G0782 // Gh_D13G0639 // Gh_D02G2156 // Gh_A11G0260 // Gh_A02G1729 // Gh_D09G0578 // Gh_D03G1327 // Gh_A12G2148 // Gh_D12G2112 // Gh_A03G1432 // Gh_A12G1931 // Gh_D02G0220 // Gh_D08G0272
GO:0006979		response to oxidative stress	21	1019	255	41939	3.4e-06	0.00085	3.07058	// Gh_D10G1644 // Gh_A12G0056 // Gh_D07G0019 // Gh_D04G1506 // Gh_D09G1420 // Gh_A10G1627 // Gh_D05G0807 // Gh_A07G0012 // Gh_A09G1202 // Gh_A04G1453 // Gh_D09G0590 // Gh_D08G2420 // Gh_A05G3239 // Gh_D04G1593 // Gh_D11G2151 // Gh_A12G2370 // Gh_D12G2504 // Gh_A11G3132 // Gh_D02G1345 // Gh_D10G1882 // Gh_D11G2183
GO:0044710		single-organism metabolic process	201	1019	6129	41939	7.3e-06	0.0015	2.82391	// Gh_D10G1086 // Gh_A12G0056 // Gh_A07G0953 // Gh_Sca039726G01 // Gh_A03G0556 // Gh_A04G1453 // Gh_D08G2420 // Gh_D11G2151 // Gh_D12G1978 // Gh_D10G1249 // Gh_D03G1545 // Gh_A13G2341 // Gh_D10G1644 // Gh_A01G0506 // Gh_D11G1628 // Gh_A03G1723 // Gh_A05G1645 // Gh_A09G1202 // Gh_D06G0864 // Gh_Sca004857G03 // Gh_A11G0905 // Gh_A06G0827 // Gh_A09G2214 // Gh_D12G2438 // Gh_A05G3413 // Gh_A01G1866 /…
GO:0006073		cellular glucan metabolic process	19	1019	241	41939	1.7e-05	0.0027	2.56864	// Gh_D02G2156 // Gh_A09G1690 // Gh_A03G1432 // Gh_A03G0243 // Gh_D07G0782 // Gh_D11G1628 // Gh_A02G1426 // Gh_A03G1723 // Gh_A11G1910 // Gh_D02G0220 // Gh_D01G1277 // Gh_A02G1729 // Gh_D03G1327 // Gh_D13G0639 // Gh_A13G0500 // Gh_D08G0272 // Gh_A08G0195 // Gh_A12G2148 // Gh_A05G1645
GO:0044042		glucan metabolic process	19	1019	241	41939	1.7e-05	0.0027	2.56864	// Gh_D02G2156 // Gh_A09G1690 // Gh_A03G1432 // Gh_A03G0243 // Gh_D07G0782 // Gh_D11G1628 // Gh_A02G1426 // Gh_A03G1723 // Gh_A11G1910 // Gh_D02G0220 // Gh_D01G1277 // Gh_A02G1729 // Gh_D03G1327 // Gh_D13G0639 // Gh_A13G0500 // Gh_D08G0272 // Gh_A08G0195 // Gh_A12G2148 // Gh_A05G1645
GO:0016311		dephosphorylation	20	1019	267	41939	2.1e-05	0.0029	2.5376	// Gh_D02G0689 // Gh_A13G0184 // Gh_A07G2025 // Gh_D07G2383 // Gh_A05G0782 // Gh_A07G1541 // Gh_D12G2508 // Gh_A07G0123 // Gh_A08G1663 // Gh_D07G2245 // Gh_D02G1378 // Gh_D05G3907 // Gh_A03G0991 // Gh_D04G0015 // Gh_A09G1649 // Gh_A12G2274 // Gh_A12G2380 // Gh_A10G1998 // Gh_A05G3589 // Gh_A02G0642
GO:0044264		cellular polysaccharide metabolic process	19	1019	258	41939	4.1e-05	0.0052	2.284	// Gh_D02G2156 // Gh_A09G1690 // Gh_A03G1432 // Gh_A03G0243 // Gh_D07G0782 // Gh_D11G1628 // Gh_A02G1426 // Gh_A03G1723 // Gh_A11G1910 // Gh_D02G0220 // Gh_D01G1277 // Gh_A02G1729 // Gh_D03G1327 // Gh_D13G0639 // Gh_A13G0500 // Gh_D08G0272 // Gh_A08G0195 // Gh_A12G2148 // Gh_A05G1645
GO:0005984		disaccharide metabolic process	10	1019	81	41939	6.1e-05	0.007	2.1549	// Gh_A03G1983 // Gh_D05G0363 // Gh_A06G0716 // Gh_A12G1807 // Gh_D11G2201 // Gh_A08G1399 // Gh_D12G1978 // Gh_D03G1545 // Gh_D08G1695 // Gh_A11G3117
GO:0005992		trehalose biosynthetic process	8	1019	54	41939	0.00011	0.011	1.95861	// Gh_A03G1983 // Gh_A12G1807 // Gh_D11G2201 // Gh_A11G3117 // Gh_D12G1978 // Gh_D03G1545 // Gh_D08G1695 // Gh_A08G1399
GO:0055085		transmembrane transport	66	1019	1669	41939	0.00013	0.012	1.92082	// Gh_Sca039726G01 // Gh_A10G0537 // Gh_A05G0795 // Gh_D01G0358 // Gh_A05G0177 // Gh_A02G0445 // Gh_A10G1803 // Gh_D10G0190 // Gh_A13G1059 // Gh_A12G0944 // Gh_D11G1852 // Gh_D01G2147 // Gh_A05G0956 // Gh_D12G0090 // Gh_D05G0913 // Gh_D01G2240 // Gh_D06G0667 // Gh_D03G0601 // Gh_D06G0051 // Gh_D13G2024 // Gh_A05G1416 // Gh_D13G1325 // Gh_D02G0947 // Gh_A03G1748 // Gh_D04G1298 // Gh_D09G1766 // Gh…
GO:0030001		metal ion transport	27	1019	487	41939	0.00012	0.012	1.92082	// Gh_A05G0795 // Gh_A08G1780 // Gh_A04G0606 // Gh_D08G1473 // Gh_D13G2024 // Gh_A09G2418 // Gh_D05G0030 // Gh_D12G0090 // Gh_A05G1510 // Gh_D05G0913 // Gh_D03G1150 // Gh_A01G1576 // Gh_A05G0956 // Gh_A01G0705 // Gh_D06G1695 // Gh_D09G1375 // Gh_A01G0801 // Gh_A07G1285 // Gh_A06G1962 // Gh_D08G2126 // Gh_D05G0432 // Gh_D01G0723 // Gh_D09G1582 // Gh_A08G2388 // Gh_A08G0745 // Gh_D04G1066 // Gh_A12…
GO:0005991		trehalose metabolic process	8	1019	58	41939	0.00017	0.013	1.88606	// Gh_A03G1983 // Gh_A12G1807 // Gh_D11G2201 // Gh_A11G3117 // Gh_D12G1978 // Gh_D03G1545 // Gh_D08G1695 // Gh_A08G1399
GO:0046351		disaccharide biosynthetic process	8	1019	58	41939	0.00017	0.013	1.88606	// Gh_A03G1983 // Gh_A12G1807 // Gh_D11G2201 // Gh_A11G3117 // Gh_D12G1978 // Gh_D03G1545 // Gh_D08G1695 // Gh_A08G1399
GO:0006560		proline metabolic process	5	1019	19	41939	0.00022	0.016	1.79588	// Gh_D11G1706 // Gh_D04G1204 // Gh_A01G1899 // Gh_A04G1396 // Gh_A11G1551
GO:0071554		cell wall organization or biogenesis	22	1019	378	41939	0.00027	0.019	1.72125	// Gh_D06G0865 // Gh_D04G1320 // Gh_D02G2286 // Gh_D02G2149 // Gh_A13G0672 // Gh_A01G0477 // Gh_D11G1103 // Gh_D07G1162 // Gh_A02G0668 // Gh_A07G1208 // Gh_A04G0821 // Gh_A06G1279 // Gh_A10G1606 // Gh_A11G0955 // Gh_D01G1682 // Gh_D02G1269 // Gh_D12G1238 // Gh_A13G0050 // Gh_D01G0492 // Gh_D13G0786 // Gh_D02G0714 // Gh_A05G1180
GO:0009311		oligosaccharide metabolic process	10	1019	106	41939	0.00046	0.03	1.52288	// Gh_A03G1983 // Gh_D05G0363 // Gh_A06G0716 // Gh_A12G1807 // Gh_D11G2201 // Gh_A08G1399 // Gh_D12G1978 // Gh_D03G1545 // Gh_D08G1695 // Gh_A11G3117
GO:0006470		protein dephosphorylation	14	1019	199	41939	0.00062	0.039	1.40894	// Gh_A05G3589 // Gh_A07G2025 // Gh_A05G0782 // Gh_A12G2380 // Gh_D12G2508 // Gh_A07G0123 // Gh_D07G2383 // Gh_D05G3907 // Gh_D07G2245 // Gh_D04G0015 // Gh_A09G1649 // Gh_A12G2274 // Gh_A10G1998 // Gh_A13G0184
GO:0004553	Molecular Function	hydrolase activity, hydrolyzing O-glycosyl compounds	68	1019	910	41939	4.5e-15	3.9e-12	11.4089	// Gh_D13G0046 // Gh_A09G2413 // Gh_A10G2145 // Gh_D09G2276 // Gh_A02G1426 // Gh_D04G1322 // Gh_D06G0726 // Gh_D02G2286 // Gh_D03G0401 // Gh_D11G0237 // Gh_A13G0500 // Gh_D09G1856 // Gh_A09G2067 // Gh_A13G1509 // Gh_A11G1910 // Gh_D10G1605 // Gh_D01G1277 // Gh_D11G1103 // Gh_A12G1931 // Gh_A08G0738 // Gh_A05G3256 // Gh_A08G0872 // Gh_A07G2033 // Gh_A13G0023 // Gh_A08G0999 // Gh_D08G1052 // Gh_A03…
GO:0016798		hydrolase activity, acting on glycosyl bonds	69	1019	966	41939	2.2e-14	9.4e-12	11.0269	// Gh_D13G0046 // Gh_A09G2413 // Gh_A10G2145 // Gh_D09G2276 // Gh_A02G1426 // Gh_D04G1322 // Gh_D06G0726 // Gh_D02G2286 // Gh_D03G0401 // Gh_D11G0237 // Gh_A13G0500 // Gh_D09G1856 // Gh_A09G2067 // Gh_A13G1509 // Gh_D04G1888 // Gh_A11G1910 // Gh_D10G1605 // Gh_D01G1277 // Gh_D11G1103 // Gh_A12G1931 // Gh_A08G0738 // Gh_A05G3256 // Gh_A08G0872 // Gh_A07G2033 // Gh_A13G0023 // Gh_A08G0999 // Gh_D08…
GO:0004650		polygalacturonase activity	18	1019	131	41939	1.9e-08	5.3e-06	5.27572	// Gh_A10G1706 // Gh_A08G0999 // Gh_D13G0046 // Gh_A10G1705 // Gh_A05G3328 // Gh_A11G0223 // Gh_A04G0823 // Gh_D04G1322 // Gh_D11G0237 // Gh_D09G1601 // Gh_D12G1231 // Gh_A13G0030 // Gh_D10G1974 // Gh_A09G2413 // Gh_A07G2033 // Gh_D10G1975 // Gh_D08G1272 // Gh_A13G0023
GO:0003824		catalytic activity	547	1019	19153	41939	2.5e-07	4.3e-05	4.36653	// Gh_A12G0056 // Gh_A07G0953 // Gh_D06G1104 // Gh_A03G0556 // Gh_A04G1453 // Gh_D05G1513 // Gh_A01G1268 // Gh_A10G1998 // Gh_D10G1644 // Gh_A06G1699 // Gh_Sca005107G01 // Gh_D12G0456 // Gh_A02G1140 // Gh_A01G0747 // Gh_D11G1628 // Gh_A11G1910 // Gh_D07G0734 // Gh_A05G3256 // Gh_A06G0580 // Gh_D08G2651 // Gh_A05G0783 // Gh_A05G0782 // Gh_D09G2429 // Gh_A11G0474 // Gh_A09G2130 // Gh_D07G1557 // Gh…
GO:0016762		xyloglucan:xyloglucosyl transferase activity	12	1019	64	41939	2.3e-07	4.3e-05	4.36653	// Gh_A03G1432 // Gh_A03G0243 // Gh_A02G1426 // Gh_A11G1910 // Gh_D02G0220 // Gh_D01G1277 // Gh_A02G1729 // Gh_D03G1327 // Gh_D13G0639 // Gh_A13G0500 // Gh_A08G0195 // Gh_D08G0272
GO:0016491		oxidoreductase activity	144	1019	3858	41939	3.1e-07	4.5e-05	4.34679	// Gh_D10G1086 // Gh_A12G0056 // Gh_A07G0953 // Gh_A04G1453 // Gh_D08G2420 // Gh_D11G2151 // Gh_D10G1249 // Gh_A13G2341 // Gh_D10G1644 // Gh_Sca005107G01 // Gh_A01G0506 // Gh_A04G0465 // Gh_A09G1555 // Gh_A09G1202 // Gh_D06G0864 // Gh_Sca004857G03 // Gh_A11G0905 // Gh_A06G0827 // Gh_D12G2438 // Gh_A05G0783 // Gh_D06G0959 // Gh_D08G2256 // Gh_D09G1627 // Gh_A06G1604 // Gh_D12G0344 // Gh_D05G1600 /…
GO:0016209		antioxidant activity	24	1019	312	41939	2.1e-06	0.00026	3.58503	// Gh_A12G0056 // Gh_A07G0012 // Gh_A04G1453 // Gh_D08G2420 // Gh_D04G1593 // Gh_D11G2151 // Gh_A12G2370 // Gh_A05G3239 // Gh_D10G1644 // Gh_D07G0457 // Gh_D10G1825 // Gh_A09G1202 // Gh_D09G0590 // Gh_D09G1420 // Gh_D10G1882 // Gh_D12G2504 // Gh_D07G0019 // Gh_D04G1506 // Gh_A10G1627 // Gh_D05G0807 // Gh_A13G1450 // Gh_A11G3132 // Gh_D02G1345 // Gh_D11G2183
GO:0016684		oxidoreductase activity, acting on peroxide as acceptor	22	1019	288	41939	6.1e-06	0.00066	3.18046	// Gh_A12G0056 // Gh_A04G1453 // Gh_D08G2420 // Gh_D04G1593 // Gh_D11G2151 // Gh_A12G2370 // Gh_A05G3239 // Gh_D10G1644 // Gh_D10G1825 // Gh_A09G1202 // Gh_D09G0590 // Gh_D09G1420 // Gh_D10G1882 // Gh_D12G2504 // Gh_D07G0019 // Gh_D04G1506 // Gh_A10G1627 // Gh_D05G0807 // Gh_A07G0012 // Gh_A11G3132 // Gh_D02G1345 // Gh_D11G2183
GO:0016787		hydrolase activity	203	1019	6288	41939	1.7e-05	0.0015	2.82391	// Gh_D06G1104 // Gh_A02G1426 // Gh_A03G0556 // Gh_A06G1838 // Gh_D02G2286 // Gh_D10G0577 // Gh_D12G1029 // Gh_A01G1268 // Gh_D02G0920 // Gh_A10G1998 // Gh_A13G0520 // Gh_A10G0286 // Gh_D12G0456 // Gh_A02G1140 // Gh_A06G0183 // Gh_A11G1910 // Gh_A10G0281 // Gh_D11G1103 // Gh_A05G1180 // Gh_A05G3256 // Gh_A08G0872 // Gh_D10G2617 // Gh_A12G1513 // Gh_A06G0580 // Gh_A07G1950 // Gh_A10G1706 // Gh_A05…
GO:0004601		peroxidase activity	21	1019	284	41939	1.6e-05	0.0015	2.82391	// Gh_D10G1644 // Gh_A12G0056 // Gh_D07G0019 // Gh_D04G1506 // Gh_D09G1420 // Gh_A10G1627 // Gh_D05G0807 // Gh_A07G0012 // Gh_A09G1202 // Gh_A04G1453 // Gh_D09G0590 // Gh_D08G2420 // Gh_A05G3239 // Gh_D04G1593 // Gh_D11G2151 // Gh_A12G2370 // Gh_D12G2504 // Gh_A11G3132 // Gh_D02G1345 // Gh_D10G1882 // Gh_D11G2183
GO:0016791		phosphatase activity	20	1019	287	41939	5.4e-05	0.0042	2.37675	// Gh_A07G1541 // Gh_D04G1683 // Gh_D07G1517 // Gh_D07G2383 // Gh_A05G0782 // Gh_A05G3589 // Gh_D12G2508 // Gh_A07G0123 // Gh_A07G2025 // Gh_D04G0015 // Gh_D05G3907 // Gh_D07G2245 // Gh_D10G0577 // Gh_A02G0020 // Gh_A09G1649 // Gh_A12G2274 // Gh_A12G2380 // Gh_A10G1998 // Gh_A13G0184 // Gh_A04G1076
GO:0005507		copper ion binding	21	1019	316	41939	6.7e-05	0.0048	2.31876	// Gh_D12G0861 // Gh_A10G0836 // Gh_A03G0492 // Gh_A05G2114 // Gh_A05G2115 // Gh_D03G1043 // Gh_D11G1913 // Gh_D04G1243 // Gh_D05G2355 // Gh_A12G0639 // Gh_D03G0412 // Gh_D13G0253 // Gh_A13G0237 // Gh_A04G0744 // Gh_D05G0733 // Gh_D12G0344 // Gh_A13G2215 // Gh_A06G0262 // Gh_D06G0284 // Gh_A11G1127 // Gh_D13G2524
GO:0005215		transporter activity	80	1019	2129	41939	0.00013	0.0086	2.0655	// Gh_A12G0022 // Gh_A04G0836 // Gh_A05G1715 // Gh_Sca039726G01 // Gh_A03G0028 // Gh_A08G2559 // Gh_D10G0861 // Gh_A10G0435 // Gh_A05G0177 // Gh_A02G0445 // Gh_A03G1748 // Gh_D10G0190 // Gh_D12G1974 // Gh_A13G1059 // Gh_D11G1852 // Gh_A05G0889 // Gh_D01G2147 // Gh_A05G0956 // Gh_A07G0202 // Gh_A10G0537 // Gh_D12G0090 // Gh_D05G0913 // Gh_D01G2240 // Gh_D06G0667 // Gh_D03G0601 // Gh_D08G0007 // Gh…
GO:0042578		phosphoric ester hydrolase activity	22	1019	371	41939	0.00021	0.012	1.92082	// Gh_A05G3589 // Gh_D05G3907 // Gh_D04G0015 // Gh_A02G0020 // Gh_A10G1998 // Gh_A13G0184 // Gh_A04G1076 // Gh_A07G0123 // Gh_A12G2380 // Gh_D04G1683 // Gh_D07G1517 // Gh_A05G0782 // Gh_A07G2133 // Gh_D07G2342 // Gh_A07G1541 // Gh_D12G2508 // Gh_D07G2383 // Gh_D10G0577 // Gh_D07G2245 // Gh_A09G1649 // Gh_A12G2274 // Gh_A07G2025
GO:0004722		protein serine/threonine phosphatase activity	12	1019	134	41939	0.0002	0.012	1.92082	// Gh_A05G3589 // Gh_A05G0782 // Gh_D12G2508 // Gh_A07G0123 // Gh_D07G2383 // Gh_D05G3907 // Gh_A12G2380 // Gh_D04G0015 // Gh_A09G1649 // Gh_A12G2274 // Gh_A10G1998 // Gh_A13G0184
GO:0020037		heme binding	43	1019	1011	41939	0.00048	0.026	1.58503	// Gh_A12G0056 // Gh_D01G1909 // Gh_A06G1918 // Gh_A04G1453 // Gh_D08G2420 // Gh_D04G1593 // Gh_D11G2151 // Gh_A12G2370 // Gh_A05G3239 // Gh_D10G1644 // Gh_D12G1248 // Gh_D09G0590 // Gh_A09G1202 // Gh_D04G0931 // Gh_D08G2495 // Gh_A11G0905 // Gh_D09G1420 // Gh_D10G1882 // Gh_A05G1709 // Gh_A08G1344 // Gh_D12G2194 // Gh_D01G1930 // Gh_D09G0470 // Gh_D11G3255 // Gh_D09G2440 // Gh_D12G2504 // Gh_D07…
GO:0004721		phosphoprotein phosphatase activity	15	1019	220	41939	0.00055	0.028	1.55284	// Gh_A07G1541 // Gh_A07G2025 // Gh_A05G0782 // Gh_A05G3589 // Gh_D12G2508 // Gh_A07G0123 // Gh_D07G2383 // Gh_D05G3907 // Gh_D07G2245 // Gh_D04G0015 // Gh_A09G1649 // Gh_A12G2274 // Gh_A12G2380 // Gh_A10G1998 // Gh_A13G0184
GO:0022857		transmembrane transporter activity	60	1019	1578	41939	0.00067	0.032	1.49485	// Gh_A12G0022 // Gh_A10G0537 // Gh_Sca039726G01 // Gh_A10G0435 // Gh_A05G0177 // Gh_A02G0445 // Gh_A03G1748 // Gh_D10G0190 // Gh_A13G1059 // Gh_D11G1852 // Gh_D01G2147 // Gh_A05G0956 // Gh_D05G0030 // Gh_D12G0090 // Gh_D05G0913 // Gh_D01G2240 // Gh_D06G0667 // Gh_D03G0601 // Gh_A08G0745 // Gh_D06G0051 // Gh_D13G2024 // Gh_A05G1416 // Gh_D13G1325 // Gh_D02G0947 // Gh_D12G2583 // Gh_D04G0931 // Gh…
GO:0046906		tetrapyrrole binding	43	1019	1047	41939	0.00093	0.043	1.36653	// Gh_A12G0056 // Gh_D01G1909 // Gh_A06G1918 // Gh_A04G1453 // Gh_D08G2420 // Gh_D04G1593 // Gh_D11G2151 // Gh_A12G2370 // Gh_A05G3239 // Gh_D10G1644 // Gh_D12G1248 // Gh_D09G0590 // Gh_A09G1202 // Gh_D04G0931 // Gh_D08G2495 // Gh_A11G0905 // Gh_D09G1420 // Gh_D10G1882 // Gh_A05G1709 // Gh_A08G1344 // Gh_D12G2194 // Gh_D01G1930 // Gh_D09G0470 // Gh_D11G3255 // Gh_D09G2440 // Gh_D12G2504 // Gh_D07…
GO:0005576	Cellular Component	extracellular region	27	1019	260	41939	1.7e-09	1.9e-07	6.72125	// Gh_A02G1426 // Gh_A08G0195 // Gh_A13G0500 // Gh_D02G1269 // Gh_A13G0672 // Gh_A08G0770 // Gh_D01G1679 // Gh_A03G2186 // Gh_A11G1910 // Gh_A01G0477 // Gh_D01G1277 // Gh_A05G0532 // Gh_A07G1208 // Gh_A03G0243 // Gh_D13G0639 // Gh_A02G1729 // Gh_D03G1327 // Gh_D03G1609 // Gh_A11G1922 // Gh_A03G1432 // Gh_D13G0786 // Gh_D02G0220 // Gh_A03G0046 // Gh_A13G0050 // Gh_D08G0272 // Gh_D01G0492 // Gh_A10…
GO:0048046		apoplast	12	1019	64	41939	2.3e-07	1.3e-05	4.88606	// Gh_A03G1432 // Gh_A03G0243 // Gh_A02G1426 // Gh_A11G1910 // Gh_D02G0220 // Gh_D01G1277 // Gh_A02G1729 // Gh_D03G1327 // Gh_D13G0639 // Gh_A13G0500 // Gh_A08G0195 // Gh_D08G0272
GO:0030312		external encapsulating structure	20	1019	228	41939	2.4e-06	6.8e-05	4.16749	// Gh_A03G1432 // Gh_A03G0243 // Gh_D13G0639 // Gh_D06G0865 // Gh_A02G1426 // Gh_A11G1910 // Gh_D04G1320 // Gh_D01G1277 // Gh_D02G2149 // Gh_A02G1729 // Gh_D07G1162 // Gh_D03G1327 // Gh_D02G0220 // Gh_A13G0500 // Gh_A06G1279 // Gh_A08G0195 // Gh_D12G1238 // Gh_A05G1180 // Gh_A04G0821 // Gh_D08G0272
GO:0005618		cell wall	20	1019	228	41939	2.4e-06	6.8e-05	4.16749	// Gh_A03G1432 // Gh_A03G0243 // Gh_D13G0639 // Gh_D06G0865 // Gh_A02G1426 // Gh_A11G1910 // Gh_D04G1320 // Gh_D01G1277 // Gh_D02G2149 // Gh_A02G1729 // Gh_D07G1162 // Gh_D03G1327 // Gh_D02G0220 // Gh_A13G0500 // Gh_A06G1279 // Gh_A08G0195 // Gh_D12G1238 // Gh_A05G1180 // Gh_A04G0821 // Gh_D08G0272
GO:0071944		cell periphery	22	1019	404	41939	0.00063	0.014	1.85387	// Gh_D06G0865 // Gh_A02G1426 // Gh_D04G1320 // Gh_A08G0195 // Gh_A13G0500 // Gh_D02G2149 // Gh_A11G1910 // Gh_D01G1277 // Gh_D07G1162 // Gh_D05G3898 // Gh_A03G0243 // Gh_A04G0821 // Gh_D13G0639 // Gh_A02G1729 // Gh_D03G1327 // Gh_A05G0839 // Gh_A03G1432 // Gh_A05G1180 // Gh_D02G0220 // Gh_D12G1238 // Gh_D08G0272 // Gh_A06G1279

## Sheet: Maize
GO_acc	term_type	Term	queryitem	querytotal	bgitem	bgtotal	pvalue	FDR	-Log10FDR	entries
GO:0055114	Biological Process	oxidation-reduction process	175	1317	2315	30113	6.8e-12	2.7e-08	7.56864	// Zm00001d037359 // Zm00001d002898 // Zm00001d044703 // Zm00001d014055 // Zm00001d038897 // Zm00001d017418 // Zm00001d039131 // Zm00001d042848 // Zm00001d012304 // Zm00001d026334 // Zm00001d016684 // Zm00001d002000 // Zm00001d044748 // Zm00001d052530 // Zm00001d020238 // Zm00001d019669 // Zm00001d006098 // Zm00001d006936 // Zm00001d034096 // Zm00001d034097 // Zm00001d034095 // Zm00001d049539 // …
GO:0044710		single-organism metabolic process	307	1317	5053	30113	1.9e-09	1.9e-06	5.72125	// Zm00001d037359 // Zm00001d002898 // Zm00001d004804 // Zm00001d018342 // Zm00001d041082 // Zm00001d029648 // Zm00001d013412 // Zm00001d023228 // Zm00001d017418 // Zm00001d039131 // Zm00001d045261 // Zm00001d045383 // Zm00001d044228 // Zm00001d037689 // Zm00001d024512 // Zm00001d011097 // Zm00001d044748 // Zm00001d042353 // Zm00001d002000 // Zm00001d028366 // Zm00001d052530 // Zm00001d029087 // …
GO:0006979		response to oxidative stress	43	1317	348	30113	9.7e-09	6.5e-06	5.18709	// Zm00001d037359 // Zm00001d002898 // Zm00001d007160 // Zm00001d027511 // Zm00001d037480 // Zm00001d040399 // Zm00001d016185 // Zm00001d040245 // Zm00001d041827 // Zm00001d039685 // Zm00001d016802 // Zm00001d022457 // Zm00001d043144 // Zm00001d006936 // Zm00001d006937 // Zm00001d040581 // Zm00001d046186 // Zm00001d024735 // Zm00001d021634 // Zm00001d024738 // Zm00001d040702 // Zm00001d035055 // …
GO:0009311		oligosaccharide metabolic process	23	1317	121	30113	3.5e-08	1.3e-05	4.88606	// Zm00001d031300 // Zm00001d031303 // Zm00001d037480 // Zm00001d024821 // Zm00001d039685 // Zm00001d042353 // Zm00001d029087 // Zm00001d020396 // Zm00001d019163 // Zm00001d012036 // Zm00001d032298 // Zm00001d003277 // Zm00001d047110 // Zm00001d012748 // Zm00001d020272 // Zm00001d052060 // Zm00001d017502 // Zm00001d004804 // Zm00001d018342 // Zm00001d045042 // Zm00001d029091 // Zm00001d050125 // …
GO:0055085		transmembrane transport	123	1317	1719	30113	2.1e-07	6.4e-05	4.19382	// Zm00001d045883 // Zm00001d023593 // Zm00001d051415 // Zm00001d050577 // Zm00001d000434 // Zm00001d000204 // Zm00001d045667 // Zm00001d034940 // Zm00001d045122 // Zm00001d016530 // Zm00001d025665 // Zm00001d035157 // Zm00001d018037 // Zm00001d051174 // Zm00001d020555 // Zm00001d052063 // Zm00001d034035 // Zm00001d038334 // Zm00001d025983 // Zm00001d016855 // Zm00001d007397 // Zm00001d002658 // …
GO:0005984		disaccharide metabolic process	17	1317	85	30113	1.1e-06	0.00025	3.60206	// Zm00001d029087 // Zm00001d047110 // Zm00001d020396 // Zm00001d004804 // Zm00001d020272 // Zm00001d005658 // Zm00001d029091 // Zm00001d052060 // Zm00001d012748 // Zm00001d050125 // Zm00001d017502 // Zm00001d012036 // Zm00001d024821 // Zm00001d018342 // Zm00001d032298 // Zm00001d042353 // Zm00001d045042
GO:0005975		carbohydrate metabolic process	105	1317	1502	30113	4.4e-06	0.00074	3.13077	// Zm00001d030361 // Zm00001d007113 // Zm00001d032947 // Zm00001d025354 // Zm00001d010212 // Zm00001d039131 // Zm00001d045261 // Zm00001d037689 // Zm00001d044110 // Zm00001d042353 // Zm00001d029087 // Zm00001d034551 // Zm00001d004448 // Zm00001d014613 // Zm00001d014617 // Zm00001d047110 // Zm00001d017699 // Zm00001d037480 // Zm00001d000117 // Zm00001d047970 // Zm00001d004804 // Zm00001d009667 // …
GO:0046351		disaccharide biosynthetic process	11	1317	46	30113	2.1e-05	0.0032	2.49485	// Zm00001d047110 // Zm00001d012748 // Zm00001d020272 // Zm00001d005658 // Zm00001d052060 // Zm00001d020396 // Zm00001d017502 // Zm00001d012036 // Zm00001d024821 // Zm00001d018342 // Zm00001d032298
GO:0016311		dephosphorylation	49	1317	583	30113	3.1e-05	0.0042	2.37675	// Zm00001d044693 // Zm00001d050026 // Zm00001d029419 // Zm00001d035614 // Zm00001d030765 // Zm00001d011734 // Zm00001d031657 // Zm00001d011131 // Zm00001d024821 // Zm00001d042886 // Zm00001d012401 // Zm00001d038366 // Zm00001d009844 // Zm00001d020396 // Zm00001d028366 // Zm00001d039582 // Zm00001d010520 // Zm00001d053313 // Zm00001d035600 // Zm00001d047705 // Zm00001d032298 // Zm00001d046377 // …
GO:0005992		trehalose biosynthetic process	9	1317	36	30113	8.8e-05	0.011	1.95861	// Zm00001d047110 // Zm00001d020396 // Zm00001d020272 // Zm00001d005658 // Zm00001d052060 // Zm00001d012748 // Zm00001d017502 // Zm00001d018342 // Zm00001d032298
GO:0071554		cell wall organization or biogenesis	44	1317	527	30113	8.7e-05	0.011	1.95861	// Zm00001d018031 // Zm00001d023715 // Zm00001d032881 // Zm00001d052264 // Zm00001d034663 // Zm00001d002287 // Zm00001d027718 // Zm00001d007571 // Zm00001d036366 // Zm00001d044110 // Zm00001d043047 // Zm00001d047353 // Zm00001d003190 // Zm00001d034551 // Zm00001d003191 // Zm00001d017699 // Zm00001d020392 // Zm00001d023950 // Zm00001d025753 // Zm00001d009309 // Zm00001d040725 // Zm00001d014613 // …
GO:0005991		trehalose metabolic process	9	1317	37	30113	0.00011	0.012	1.92082	// Zm00001d047110 // Zm00001d020396 // Zm00001d020272 // Zm00001d005658 // Zm00001d052060 // Zm00001d012748 // Zm00001d017502 // Zm00001d018342 // Zm00001d032298
GO:0044262		cellular carbohydrate metabolic process	42	1317	519	30113	0.00023	0.023	1.63827	// Zm00001d044693 // Zm00001d018342 // Zm00001d050125 // Zm00001d029025 // Zm00001d039131 // Zm00001d045261 // Zm00001d037689 // Zm00001d042353 // Zm00001d029087 // Zm00001d020396 // Zm00001d017699 // Zm00001d020392 // Zm00001d023950 // Zm00001d005658 // Zm00001d016684 // Zm00001d012036 // Zm00001d009309 // Zm00001d014613 // Zm00001d032298 // Zm00001d046234 // Zm00001d014617 // Zm00001d047110 // …
GO:0042744		hydrogen peroxide catabolic process	30	1317	163	30113	6e-10	1.2e-06	5.92082	// Zm00001d037359 // Zm00001d002898 // Zm00001d007160 // Zm00001d027511 // Zm00001d040399 // Zm00001d016185 // Zm00001d041827 // Zm00001d016802 // Zm00001d022457 // Zm00001d006936 // Zm00001d040581 // Zm00001d006937 // Zm00001d024735 // Zm00001d024738 // Zm00001d040702 // Zm00001d035055 // Zm00001d029604 // Zm00001d022456 // Zm00001d054044 // Zm00001d032854 // Zm00001d009138 // Zm00001d052335 // …
GO:0042743		hydrogen peroxide metabolic process	30	1317	166	30113	8.8e-10	1.2e-06	5.92082	// Zm00001d037359 // Zm00001d002898 // Zm00001d007160 // Zm00001d027511 // Zm00001d040399 // Zm00001d016185 // Zm00001d041827 // Zm00001d016802 // Zm00001d022457 // Zm00001d006936 // Zm00001d040581 // Zm00001d006937 // Zm00001d024735 // Zm00001d024738 // Zm00001d040702 // Zm00001d035055 // Zm00001d029604 // Zm00001d022456 // Zm00001d054044 // Zm00001d032854 // Zm00001d009138 // Zm00001d052335 // …
GO:0072593		reactive oxygen species metabolic process	33	1317	208	30113	2.4e-09	1.9e-06	5.72125	// Zm00001d037359 // Zm00001d002898 // Zm00001d007160 // Zm00001d027511 // Zm00001d040399 // Zm00001d016185 // Zm00001d041827 // Zm00001d016802 // Zm00001d022457 // Zm00001d006936 // Zm00001d006937 // Zm00001d040581 // Zm00001d046186 // Zm00001d024735 // Zm00001d024738 // Zm00001d040702 // Zm00001d035055 // Zm00001d029604 // Zm00001d022456 // Zm00001d054044 // Zm00001d032854 // Zm00001d009138 // …
GO:0009737		response to abscisic acid	33	1317	224	30113	1.2e-08	6.7e-06	5.17393	// Zm00001d014055 // Zm00001d045321 // Zm00001d027511 // Zm00001d017547 // Zm00001d039685 // Zm00001d002000 // Zm00001d005698 // Zm00001d026018 // Zm00001d028689 // Zm00001d047705 // Zm00001d017251 // Zm00001d018429 // Zm00001d032519 // Zm00001d054044 // Zm00001d023664 // Zm00001d051420 // Zm00001d009646 // Zm00001d028574 // Zm00001d013900 // Zm00001d010094 // Zm00001d038252 // Zm00001d009626 // …
GO:0042221		response to chemical	115	1317	1493	30113	1.5e-08	6.7e-06	5.17393	// Zm00001d037359 // Zm00001d002898 // Zm00001d014055 // Zm00001d002000 // Zm00001d044099 // Zm00001d002540 // Zm00001d026018 // Zm00001d017251 // Zm00001d021634 // Zm00001d040702 // Zm00001d053675 // Zm00001d051174 // Zm00001d013903 // Zm00001d013900 // Zm00001d025984 // Zm00001d017547 // Zm00001d002658 // Zm00001d038436 // Zm00001d015133 // Zm00001d028793 // Zm00001d014976 // Zm00001d033300 // …
GO:0097305		response to alcohol	33	1317	225	30113	1.3e-08	6.7e-06	5.17393	// Zm00001d014055 // Zm00001d045321 // Zm00001d027511 // Zm00001d017547 // Zm00001d039685 // Zm00001d002000 // Zm00001d005698 // Zm00001d026018 // Zm00001d028689 // Zm00001d047705 // Zm00001d017251 // Zm00001d018429 // Zm00001d032519 // Zm00001d054044 // Zm00001d023664 // Zm00001d051420 // Zm00001d009646 // Zm00001d028574 // Zm00001d013900 // Zm00001d010094 // Zm00001d038252 // Zm00001d009626 // …
GO:0009266		response to temperature stimulus	34	1317	246	30113	3e-08	1.2e-05	4.92082	// Zm00001d047799 // Zm00001d045321 // Zm00001d024903 // Zm00001d013507 // Zm00001d044168 // Zm00001d037480 // Zm00001d039566 // Zm00001d017547 // Zm00001d012420 // Zm00001d042922 // Zm00001d031736 // Zm00001d034433 // Zm00001d028689 // Zm00001d017251 // Zm00001d021634 // Zm00001d018298 // Zm00001d053675 // Zm00001d054044 // Zm00001d045470 // Zm00001d044728 // Zm00001d051420 // Zm00001d017502 // …
GO:0009312		oligosaccharide biosynthetic process	17	1317	68	30113	7.3e-08	2.4e-05	4.61979	// Zm00001d047110 // Zm00001d031303 // Zm00001d020272 // Zm00001d031300 // Zm00001d019163 // Zm00001d052060 // Zm00001d037480 // Zm00001d020396 // Zm00001d005658 // Zm00001d017502 // Zm00001d012036 // Zm00001d024821 // Zm00001d018342 // Zm00001d039685 // Zm00001d032298 // Zm00001d012748 // Zm00001d003277
GO:0006950		response to stress	142	1317	2093	30113	4.2e-07	0.00012	3.92082	// Zm00001d022468 // Zm00001d037359 // Zm00001d045883 // Zm00001d002898 // Zm00001d014055 // Zm00001d044228 // Zm00001d024207 // Zm00001d017251 // Zm00001d021634 // Zm00001d040702 // Zm00001d053675 // Zm00001d051174 // Zm00001d052060 // Zm00001d035684 // Zm00001d035440 // Zm00001d013903 // Zm00001d013900 // Zm00001d046299 // Zm00001d025984 // Zm00001d004513 // Zm00001d017547 // Zm00001d029461 // …
GO:0009636		response to toxic substance	35	1317	296	30113	5.7e-07	0.00015	3.82391	// Zm00001d037359 // Zm00001d002898 // Zm00001d007160 // Zm00001d027511 // Zm00001d040399 // Zm00001d016185 // Zm00001d041827 // Zm00001d016802 // Zm00001d022457 // Zm00001d006936 // Zm00001d006937 // Zm00001d040581 // Zm00001d046186 // Zm00001d024735 // Zm00001d024738 // Zm00001d040702 // Zm00001d035055 // Zm00001d029604 // Zm00001d022456 // Zm00001d054044 // Zm00001d032854 // Zm00001d009138 // …
GO:0033993		response to lipid	35	1317	302	30113	8.8e-07	0.00022	3.65758	// Zm00001d014055 // Zm00001d045321 // Zm00001d027511 // Zm00001d017547 // Zm00001d039685 // Zm00001d002000 // Zm00001d005698 // Zm00001d026018 // Zm00001d028689 // Zm00001d047705 // Zm00001d017251 // Zm00001d018429 // Zm00001d032519 // Zm00001d010038 // Zm00001d054044 // Zm00001d008198 // Zm00001d023664 // Zm00001d051420 // Zm00001d009646 // Zm00001d028574 // Zm00001d013900 // Zm00001d010094 // …
GO:0098869		cellular oxidant detoxification	33	1317	279	30113	1.2e-06	0.00025	3.60206	// Zm00001d037359 // Zm00001d002898 // Zm00001d007160 // Zm00001d027511 // Zm00001d040399 // Zm00001d016185 // Zm00001d041827 // Zm00001d016802 // Zm00001d022457 // Zm00001d006936 // Zm00001d006937 // Zm00001d040581 // Zm00001d046186 // Zm00001d024735 // Zm00001d024738 // Zm00001d040702 // Zm00001d035055 // Zm00001d029604 // Zm00001d022456 // Zm00001d054044 // Zm00001d032854 // Zm00001d009138 // …
GO:0001101		response to acid chemical	43	1317	421	30113	1.2e-06	0.00025	3.60206	// Zm00001d020614 // Zm00001d045321 // Zm00001d014055 // Zm00001d027511 // Zm00001d022139 // Zm00001d017547 // Zm00001d009382 // Zm00001d039685 // Zm00001d014562 // Zm00001d019563 // Zm00001d027901 // Zm00001d005698 // Zm00001d026018 // Zm00001d038870 // Zm00001d002000 // Zm00001d028689 // Zm00001d051174 // Zm00001d047705 // Zm00001d017251 // Zm00001d018429 // Zm00001d032519 // Zm00001d054044 // …
GO:1990748		cellular detoxification	33	1317	280	30113	1.3e-06	0.00025	3.60206	// Zm00001d037359 // Zm00001d002898 // Zm00001d007160 // Zm00001d027511 // Zm00001d040399 // Zm00001d016185 // Zm00001d041827 // Zm00001d016802 // Zm00001d022457 // Zm00001d006936 // Zm00001d006937 // Zm00001d040581 // Zm00001d046186 // Zm00001d024735 // Zm00001d024738 // Zm00001d040702 // Zm00001d035055 // Zm00001d029604 // Zm00001d022456 // Zm00001d054044 // Zm00001d032854 // Zm00001d009138 // …
GO:0098754		detoxification	33	1317	281	30113	1.4e-06	0.00026	3.58503	// Zm00001d037359 // Zm00001d002898 // Zm00001d007160 // Zm00001d027511 // Zm00001d040399 // Zm00001d016185 // Zm00001d041827 // Zm00001d016802 // Zm00001d022457 // Zm00001d006936 // Zm00001d006937 // Zm00001d040581 // Zm00001d046186 // Zm00001d024735 // Zm00001d024738 // Zm00001d040702 // Zm00001d035055 // Zm00001d029604 // Zm00001d022456 // Zm00001d054044 // Zm00001d032854 // Zm00001d009138 // …
GO:0050896		response to stimulus	227	1317	3848	30113	3.4e-06	0.00059	3.22915	// Zm00001d022468 // Zm00001d037359 // Zm00001d045883 // Zm00001d002898 // Zm00001d030942 // Zm00001d006944 // Zm00001d013412 // Zm00001d044228 // Zm00001d002000 // Zm00001d009626 // Zm00001d044099 // Zm00001d006509 // Zm00001d046561 // Zm00001d002658 // Zm00001d016783 // Zm00001d024839 // Zm00001d017251 // Zm00001d007624 // Zm00001d021634 // Zm00001d040702 // Zm00001d053675 // Zm00001d009010 // …
GO:0044699		single-organism process	508	1317	9791	30113	3.4e-06	0.00059	3.22915	// Zm00001d002898 // Zm00001d041082 // Zm00001d039131 // Zm00001d045261 // Zm00001d024512 // Zm00001d022195 // Zm00001d006509 // Zm00001d034096 // Zm00001d026018 // Zm00001d034095 // Zm00001d022518 // Zm00001d018037 // Zm00001d017251 // Zm00001d040702 // Zm00001d036452 // Zm00001d052063 // Zm00001d021891 // Zm00001d052060 // Zm00001d035440 // Zm00001d025983 // Zm00001d030670 // Zm00001d026635 // …
GO:0009628		response to abiotic stimulus	61	1317	745	30113	7.2e-06	0.0012	2.92082	// Zm00001d014055 // Zm00001d047799 // Zm00001d003349 // Zm00001d024903 // Zm00001d013507 // Zm00001d027511 // Zm00001d037480 // Zm00001d045883 // Zm00001d039566 // Zm00001d032353 // Zm00001d017547 // Zm00001d044168 // Zm00001d007240 // Zm00001d012420 // Zm00001d042922 // Zm00001d019563 // Zm00001d045321 // Zm00001d039685 // Zm00001d001960 // Zm00001d006683 // Zm00001d034433 // Zm00001d038870 // …
GO:0009408		response to heat	21	1317	159	30113	2.3e-05	0.0034	2.46852	// Zm00001d047799 // Zm00001d054044 // Zm00001d031736 // Zm00001d024903 // Zm00001d044728 // Zm00001d013507 // Zm00001d016255 // Zm00001d034433 // Zm00001d008397 // Zm00001d039566 // Zm00001d032923 // Zm00001d046299 // Zm00001d038806 // Zm00001d012420 // Zm00001d021634 // Zm00001d042922 // Zm00001d018298 // Zm00001d028689 // Zm00001d044168 // Zm00001d039941 // Zm00001d052194
GO:1901700		response to oxygen-containing compound	54	1317	662	30113	2.6e-05	0.0037	2.4318	// Zm00001d020614 // Zm00001d045321 // Zm00001d014055 // Zm00001d027511 // Zm00001d022139 // Zm00001d017547 // Zm00001d009382 // Zm00001d039685 // Zm00001d014562 // Zm00001d019563 // Zm00001d016802 // Zm00001d027901 // Zm00001d009626 // Zm00001d005698 // Zm00001d026018 // Zm00001d038870 // Zm00001d002000 // Zm00001d028689 // Zm00001d051174 // Zm00001d047705 // Zm00001d039941 // Zm00001d017251 // …
GO:0010325		raffinose family oligosaccharide biosynthetic process	6	1317	11	30113	4.4e-05	0.0059	2.22915	// Zm00001d031300 // Zm00001d031303 // Zm00001d019163 // Zm00001d037480 // Zm00001d039685 // Zm00001d003277
GO:0006970		response to osmotic stress	20	1317	163	30113	9.1e-05	0.011	1.95861	// Zm00001d014055 // Zm00001d045883 // Zm00001d036750 // Zm00001d008198 // Zm00001d044728 // Zm00001d052194 // Zm00001d028689 // Zm00001d009646 // Zm00001d035440 // Zm00001d033300 // Zm00001d017502 // Zm00001d015985 // Zm00001d025984 // Zm00001d021634 // Zm00001d018298 // Zm00001d039566 // Zm00001d047753 // Zm00001d008974 // Zm00001d039941 // Zm00001d022504
GO:0046348		amino sugar catabolic process	7	1317	23	30113	0.00019	0.02	1.69897	// Zm00001d003191 // Zm00001d003190 // Zm00001d003188 // Zm00001d025753 // Zm00001d027525 // Zm00001d036366 // Zm00001d036370
GO:0006026		aminoglycan catabolic process	7	1317	23	30113	0.00019	0.02	1.69897	// Zm00001d003191 // Zm00001d003190 // Zm00001d003188 // Zm00001d025753 // Zm00001d027525 // Zm00001d036366 // Zm00001d036370
GO:1901072		glucosamine-containing compound catabolic process	7	1317	23	30113	0.00019	0.02	1.69897	// Zm00001d003191 // Zm00001d003190 // Zm00001d003188 // Zm00001d025753 // Zm00001d027525 // Zm00001d036366 // Zm00001d036370
GO:0006030		chitin metabolic process	7	1317	23	30113	0.00019	0.02	1.69897	// Zm00001d003191 // Zm00001d003190 // Zm00001d003188 // Zm00001d025753 // Zm00001d027525 // Zm00001d036366 // Zm00001d036370
GO:0006032		chitin catabolic process	7	1317	23	30113	0.00019	0.02	1.69897	// Zm00001d003191 // Zm00001d003190 // Zm00001d003188 // Zm00001d025753 // Zm00001d027525 // Zm00001d036366 // Zm00001d036370
GO:0034219		carbohydrate transmembrane transport	15	1317	110	30113	0.00024	0.023	1.63827	// Zm00001d029098 // Zm00001d000222 // Zm00001d030464 // Zm00001d050577 // Zm00001d021943 // Zm00001d048178 // Zm00001d005594 // Zm00001d028151 // Zm00001d018627 // Zm00001d036940 // Zm00001d009071 // Zm00001d016590 // Zm00001d029135 // Zm00001d048776 // Zm00001d023941
GO:0034605		cellular response to heat	12	1317	75	30113	0.00027	0.026	1.58503	// Zm00001d047799 // Zm00001d031736 // Zm00001d024903 // Zm00001d034433 // Zm00001d013507 // Zm00001d016255 // Zm00001d032923 // Zm00001d046299 // Zm00001d038806 // Zm00001d012420 // Zm00001d042922 // Zm00001d044168
GO:0009631		cold acclimation	6	1317	18	30113	0.00038	0.033	1.48149	// Zm00001d054044 // Zm00001d045321 // Zm00001d037059 // Zm00001d017547 // Zm00001d010094 // Zm00001d051420
GO:0071421		manganese ion transmembrane transport	7	1317	26	30113	0.00037	0.033	1.48149	// Zm00001d020395 // Zm00001d033625 // Zm00001d019327 // Zm00001d035875 // Zm00001d007397 // Zm00001d008963 // Zm00001d015133
GO:0006811		ion transport	68	1317	994	30113	0.00038	0.033	1.48149	// Zm00001d045122 // Zm00001d049218 // Zm00001d045883 // Zm00001d050079 // Zm00001d000204 // Zm00001d002558 // Zm00001d051415 // Zm00001d022449 // Zm00001d016855 // Zm00001d032353 // Zm00001d002287 // Zm00001d017539 // Zm00001d046383 // Zm00001d029126 // Zm00001d042270 // Zm00001d038180 // Zm00001d038181 // Zm00001d035875 // Zm00001d036965 // Zm00001d002038 // Zm00001d045667 // Zm00001d048411 // …
GO:0006828		manganese ion transport	7	1317	26	30113	0.00037	0.033	1.48149	// Zm00001d020395 // Zm00001d033625 // Zm00001d019327 // Zm00001d035875 // Zm00001d007397 // Zm00001d008963 // Zm00001d015133
GO:0051259		protein oligomerization	9	1317	46	30113	0.00043	0.037	1.4318	// Zm00001d054044 // Zm00001d044728 // Zm00001d027511 // Zm00001d039566 // Zm00001d021634 // Zm00001d018298 // Zm00001d019563 // Zm00001d039941 // Zm00001d045042
GO:0006022		aminoglycan metabolic process	7	1317	27	30113	0.00044	0.037	1.4318	// Zm00001d003191 // Zm00001d003190 // Zm00001d003188 // Zm00001d025753 // Zm00001d027525 // Zm00001d036366 // Zm00001d036370
GO:0009651		response to salt stress	17	1317	145	30113	0.00048	0.039	1.40894	// Zm00001d014055 // Zm00001d045883 // Zm00001d036750 // Zm00001d008198 // Zm00001d044728 // Zm00001d028689 // Zm00001d009646 // Zm00001d033300 // Zm00001d017502 // Zm00001d015985 // Zm00001d025984 // Zm00001d021634 // Zm00001d018298 // Zm00001d039566 // Zm00001d047753 // Zm00001d039941 // Zm00001d022504
GO:0016998		cell wall macromolecule catabolic process	7	1317	28	30113	0.00054	0.041	1.38722	// Zm00001d003191 // Zm00001d003190 // Zm00001d003188 // Zm00001d025753 // Zm00001d027525 // Zm00001d036366 // Zm00001d036370
GO:0006952		defense response	32	1317	374	30113	0.00052	0.041	1.38722	// Zm00001d043263 // Zm00001d020614 // Zm00001d024903 // Zm00001d034217 // Zm00001d002536 // Zm00001d012321 // Zm00001d022139 // Zm00001d002287 // Zm00001d036366 // Zm00001d014562 // Zm00001d039173 // Zm00001d003757 // Zm00001d027901 // Zm00001d034382 // Zm00001d025753 // Zm00001d033623 // Zm00001d024207 // Zm00001d044762 // Zm00001d042111 // Zm00001d003190 // Zm00001d015985 // Zm00001d030759 // …
GO:1901071		glucosamine-containing compound metabolic process	7	1317	28	30113	0.00054	0.041	1.38722	// Zm00001d003191 // Zm00001d003190 // Zm00001d003188 // Zm00001d025753 // Zm00001d027525 // Zm00001d036366 // Zm00001d036370
GO:0051704		multi-organism process	35	1317	429	30113	0.00065	0.048	1.31876	// Zm00001d034175 // Zm00001d024903 // Zm00001d034217 // Zm00001d027511 // Zm00001d002287 // Zm00001d036366 // Zm00001d014562 // Zm00001d002000 // Zm00001d003757 // Zm00001d003190 // Zm00001d047096 // Zm00001d026170 // Zm00001d033623 // Zm00001d017495 // Zm00001d053675 // Zm00001d002536 // Zm00001d029913 // Zm00001d002174 // Zm00001d042862 // Zm00001d054044 // Zm00001d012609 // Zm00001d027283 // …
GO:0009605		response to external stimulus	31	1317	363	30113	0.00065	0.048	1.31876	// Zm00001d034175 // Zm00001d024903 // Zm00001d034217 // Zm00001d027511 // Zm00001d004513 // Zm00001d032353 // Zm00001d002287 // Zm00001d036366 // Zm00001d014562 // Zm00001d002000 // Zm00001d003757 // Zm00001d003190 // Zm00001d033623 // Zm00001d053675 // Zm00001d002536 // Zm00001d042862 // Zm00001d054044 // Zm00001d035440 // Zm00001d026635 // Zm00001d025984 // Zm00001d009918 // Zm00001d030759 // …
GO:0043167	Molecular Function	ion binding	248	1317	3477	30113	4.5e-14	7.2e-11	10.1427	// Zm00001d037359 // Zm00001d002898 // Zm00001d044703 // Zm00001d041082 // Zm00001d041725 // Zm00001d044301 // Zm00001d041430 // Zm00001d042848 // Zm00001d002558 // Zm00001d013647 // Zm00001d024512 // Zm00001d002000 // Zm00001d038718 // Zm00001d052530 // Zm00001d029083 // Zm00001d040702 // Zm00001d044099 // Zm00001d033862 // Zm00001d017425 // Zm00001d002128 // Zm00001d006936 // Zm00001d004448 // …
GO:0020037		heme binding	71	1317	585	30113	3.3e-13	2.6e-10	9.58503	// Zm00001d037359 // Zm00001d002898 // Zm00001d007160 // Zm00001d052530 // Zm00001d046603 // Zm00001d006933 // Zm00001d027511 // Zm00001d014134 // Zm00001d012321 // Zm00001d040399 // Zm00001d016185 // Zm00001d054044 // Zm00001d016802 // Zm00001d012304 // Zm00001d041827 // Zm00001d038718 // Zm00001d013230 // Zm00001d022457 // Zm00001d002687 // Zm00001d034097 // Zm00001d039453 // Zm00001d040581 // …
GO:0016491		oxidoreductase activity	158	1317	1995	30113	3.1e-12	1.6e-09	8.79588	// Zm00001d037359 // Zm00001d002898 // Zm00001d044703 // Zm00001d014055 // Zm00001d038897 // Zm00001d017418 // Zm00001d042848 // Zm00001d012304 // Zm00001d026334 // Zm00001d013979 // Zm00001d002000 // Zm00001d052530 // Zm00001d020238 // Zm00001d006098 // Zm00001d006936 // Zm00001d034096 // Zm00001d034097 // Zm00001d034095 // Zm00001d049539 // Zm00001d017251 // Zm00001d040702 // Zm00001d053675 // …
GO:0046906		tetrapyrrole binding	72	1317	635	30113	4.3e-12	1.7e-09	8.76955	// Zm00001d037359 // Zm00001d002898 // Zm00001d007160 // Zm00001d052530 // Zm00001d046603 // Zm00001d006933 // Zm00001d027511 // Zm00001d014134 // Zm00001d012321 // Zm00001d040399 // Zm00001d016185 // Zm00001d054044 // Zm00001d016802 // Zm00001d012304 // Zm00001d041827 // Zm00001d038718 // Zm00001d013230 // Zm00001d022457 // Zm00001d002687 // Zm00001d034097 // Zm00001d039453 // Zm00001d040581 // …
GO:0043169		cation binding	227	1317	3260	30113	6.6e-12	2.1e-09	8.67778	// Zm00001d037359 // Zm00001d002898 // Zm00001d044703 // Zm00001d041082 // Zm00001d041725 // Zm00001d044301 // Zm00001d041430 // Zm00001d042848 // Zm00001d002558 // Zm00001d013647 // Zm00001d024512 // Zm00001d002000 // Zm00001d038718 // Zm00001d052530 // Zm00001d040702 // Zm00001d044099 // Zm00001d017425 // Zm00001d002128 // Zm00001d006936 // Zm00001d004448 // Zm00001d002540 // Zm00001d034096 // …
GO:0046872		metal ion binding	225	1317	3250	30113	1.4e-11	3.8e-09	8.42022	// Zm00001d037359 // Zm00001d002898 // Zm00001d044703 // Zm00001d041082 // Zm00001d041725 // Zm00001d044301 // Zm00001d041430 // Zm00001d042848 // Zm00001d002558 // Zm00001d013647 // Zm00001d024512 // Zm00001d002000 // Zm00001d038718 // Zm00001d052530 // Zm00001d040702 // Zm00001d044099 // Zm00001d017425 // Zm00001d002128 // Zm00001d006936 // Zm00001d004448 // Zm00001d002540 // Zm00001d034096 // …
GO:0016798		hydrolase activity, acting on glycosyl bonds	59	1317	524	30113	4.8e-10	9.8e-08	7.00877	// Zm00001d030361 // Zm00001d028199 // Zm00001d023715 // Zm00001d032947 // Zm00001d027525 // Zm00001d038049 // Zm00001d046766 // Zm00001d010212 // Zm00001d036366 // Zm00001d038577 // Zm00001d028398 // Zm00001d044110 // Zm00001d025943 // Zm00001d003191 // Zm00001d003190 // Zm00001d034551 // Zm00001d024000 // Zm00001d006243 // Zm00001d007896 // Zm00001d049028 // Zm00001d019163 // Zm00001d018404 // …
GO:0004553		hydrolase activity, hydrolyzing O-glycosyl compounds	55	1317	469	30113	4.9e-10	9.8e-08	7.00877	// Zm00001d030361 // Zm00001d028199 // Zm00001d023715 // Zm00001d032947 // Zm00001d027525 // Zm00001d038049 // Zm00001d046766 // Zm00001d010212 // Zm00001d036366 // Zm00001d038577 // Zm00001d028398 // Zm00001d044110 // Zm00001d025943 // Zm00001d003191 // Zm00001d003190 // Zm00001d034551 // Zm00001d024000 // Zm00001d006243 // Zm00001d007896 // Zm00001d049028 // Zm00001d019163 // Zm00001d018404 // …
GO:0016684		oxidoreductase activity, acting on peroxide as acceptor	33	1317	231	30113	2.4e-08	3.8e-06	5.42022	// Zm00001d037359 // Zm00001d002898 // Zm00001d007160 // Zm00001d027511 // Zm00001d040399 // Zm00001d016185 // Zm00001d041827 // Zm00001d016802 // Zm00001d022457 // Zm00001d006936 // Zm00001d006937 // Zm00001d040581 // Zm00001d046186 // Zm00001d024735 // Zm00001d024738 // Zm00001d040702 // Zm00001d035055 // Zm00001d029604 // Zm00001d022456 // Zm00001d054044 // Zm00001d032854 // Zm00001d009138 // …
GO:0004601		peroxidase activity	33	1317	231	30113	2.4e-08	3.8e-06	5.42022	// Zm00001d037359 // Zm00001d002898 // Zm00001d007160 // Zm00001d027511 // Zm00001d040399 // Zm00001d016185 // Zm00001d041827 // Zm00001d016802 // Zm00001d022457 // Zm00001d006936 // Zm00001d006937 // Zm00001d040581 // Zm00001d046186 // Zm00001d024735 // Zm00001d024738 // Zm00001d040702 // Zm00001d035055 // Zm00001d029604 // Zm00001d022456 // Zm00001d054044 // Zm00001d032854 // Zm00001d009138 // …
GO:0022857		transmembrane transporter activity	120	1317	1601	30113	3e-08	4.3e-06	5.36653	// Zm00001d045883 // Zm00001d023593 // Zm00001d051415 // Zm00001d050577 // Zm00001d000434 // Zm00001d000204 // Zm00001d045667 // Zm00001d034940 // Zm00001d045122 // Zm00001d016530 // Zm00001d025665 // Zm00001d035157 // Zm00001d018037 // Zm00001d051174 // Zm00001d020555 // Zm00001d052063 // Zm00001d034035 // Zm00001d038334 // Zm00001d025983 // Zm00001d016855 // Zm00001d007397 // Zm00001d002658 // …
GO:0003824		catalytic activity	708	1317	14030	30113	2e-07	2.7e-05	4.56864	// Zm00001d022468 // Zm00001d002898 // Zm00001d041082 // Zm00001d045302 // Zm00001d027557 // Zm00001d045264 // Zm00001d043048 // Zm00001d045261 // Zm00001d024512 // Zm00001d008568 // Zm00001d007258 // Zm00001d035683 // Zm00001d006509 // Zm00001d034096 // Zm00001d026018 // Zm00001d034095 // Zm00001d017251 // Zm00001d020400 // Zm00001d040702 // Zm00001d022044 // Zm00001d011626 // Zm00001d021891 // …
GO:0016209		antioxidant activity	33	1317	272	30113	7.1e-07	8.7e-05	4.06048	// Zm00001d037359 // Zm00001d002898 // Zm00001d007160 // Zm00001d027511 // Zm00001d040399 // Zm00001d016185 // Zm00001d041827 // Zm00001d016802 // Zm00001d022457 // Zm00001d006936 // Zm00001d006937 // Zm00001d040581 // Zm00001d046186 // Zm00001d024735 // Zm00001d024738 // Zm00001d040702 // Zm00001d035055 // Zm00001d029604 // Zm00001d022456 // Zm00001d054044 // Zm00001d032854 // Zm00001d009138 // …
GO:0030247		polysaccharide binding	19	1317	107	30113	1.3e-06	0.00014	3.85387	// Zm00001d044693 // Zm00001d003191 // Zm00001d049584 // Zm00001d002256 // Zm00001d040094 // Zm00001d003188 // Zm00001d018431 // Zm00001d025753 // Zm00001d000002 // Zm00001d023715 // Zm00001d012313 // Zm00001d030941 // Zm00001d030942 // Zm00001d027525 // Zm00001d036366 // Zm00001d010442 // Zm00001d003190 // Zm00001d036370 // Zm00001d039920
GO:0001871		pattern binding	19	1317	107	30113	1.3e-06	0.00014	3.85387	// Zm00001d044693 // Zm00001d003191 // Zm00001d049584 // Zm00001d002256 // Zm00001d040094 // Zm00001d003188 // Zm00001d018431 // Zm00001d025753 // Zm00001d000002 // Zm00001d023715 // Zm00001d012313 // Zm00001d030941 // Zm00001d030942 // Zm00001d027525 // Zm00001d036366 // Zm00001d010442 // Zm00001d003190 // Zm00001d036370 // Zm00001d039920
GO:0030246		carbohydrate binding	36	1317	323	30113	1.4e-06	0.00014	3.85387	// Zm00001d035558 // Zm00001d044693 // Zm00001d012208 // Zm00001d023715 // Zm00001d034217 // Zm00001d002536 // Zm00001d031993 // Zm00001d000002 // Zm00001d037689 // Zm00001d036366 // Zm00001d010442 // Zm00001d003191 // Zm00001d003190 // Zm00001d006243 // Zm00001d039994 // Zm00001d025753 // Zm00001d020703 // Zm00001d035561 // Zm00001d046766 // Zm00001d043256 // Zm00001d053225 // Zm00001d012313 // …
GO:0005215		transporter activity	124	1317	1823	30113	2.1e-06	0.0002	3.69897	// Zm00001d045883 // Zm00001d023593 // Zm00001d051415 // Zm00001d050577 // Zm00001d000434 // Zm00001d000204 // Zm00001d038718 // Zm00001d045667 // Zm00001d034940 // Zm00001d045122 // Zm00001d016530 // Zm00001d025665 // Zm00001d035157 // Zm00001d018037 // Zm00001d051174 // Zm00001d020555 // Zm00001d052063 // Zm00001d034035 // Zm00001d038334 // Zm00001d025983 // Zm00001d016855 // Zm00001d007397 // …
GO:0005506		iron ion binding	43	1317	465	30113	1.2e-05	0.001	3	// Zm00001d014055 // Zm00001d052530 // Zm00001d046603 // Zm00001d005823 // Zm00001d014134 // Zm00001d048702 // Zm00001d012304 // Zm00001d013230 // Zm00001d002687 // Zm00001d032925 // Zm00001d013979 // Zm00001d034096 // Zm00001d034097 // Zm00001d048703 // Zm00001d032651 // Zm00001d017251 // Zm00001d044146 // Zm00001d027443 // Zm00001d046234 // Zm00001d053675 // Zm00001d047830 // Zm00001d042026 // …
GO:0033293		monocarboxylic acid binding	11	1317	48	30113	2.9e-05	0.0025	2.60206	// Zm00001d003757 // Zm00001d042862 // Zm00001d028793 // Zm00001d016294 // Zm00001d045606 // Zm00001d004700 // Zm00001d003760 // Zm00001d047705 // Zm00001d019895 // Zm00001d040670 // Zm00001d038436
GO:0019203		carbohydrate phosphatase activity	11	1317	50	30113	4.1e-05	0.0032	2.49485	// Zm00001d044693 // Zm00001d047110 // Zm00001d020396 // Zm00001d020272 // Zm00001d005658 // Zm00001d052060 // Zm00001d012748 // Zm00001d017502 // Zm00001d024821 // Zm00001d018342 // Zm00001d032298
GO:0004497		monooxygenase activity	36	1317	389	30113	5.8e-05	0.0044	2.35655	// Zm00001d013230 // Zm00001d046603 // Zm00001d014134 // Zm00001d048702 // Zm00001d016842 // Zm00001d017528 // Zm00001d003512 // Zm00001d003349 // Zm00001d002687 // Zm00001d030851 // Zm00001d013979 // Zm00001d034096 // Zm00001d034097 // Zm00001d048703 // Zm00001d032651 // Zm00001d006649 // Zm00001d047830 // Zm00001d042026 // Zm00001d034095 // Zm00001d022351 // Zm00001d044146 // Zm00001d039453 // …
GO:0004805		trehalose-phosphatase activity	9	1317	34	30113	6e-05	0.0044	2.35655	// Zm00001d047110 // Zm00001d020396 // Zm00001d020272 // Zm00001d005658 // Zm00001d052060 // Zm00001d012748 // Zm00001d017502 // Zm00001d018342 // Zm00001d032298
GO:0022891		substrate-specific transmembrane transporter activity	77	1317	1106	30113	9.6e-05	0.0059	2.22915	// Zm00001d045122 // Zm00001d049218 // Zm00001d045883 // Zm00001d035243 // Zm00001d000222 // Zm00001d051415 // Zm00001d022449 // Zm00001d050577 // Zm00001d000434 // Zm00001d016590 // Zm00001d017539 // Zm00001d046383 // Zm00001d025665 // Zm00001d038181 // Zm00001d038180 // Zm00001d023593 // Zm00001d017531 // Zm00001d019563 // Zm00001d033552 // Zm00001d035875 // Zm00001d036965 // Zm00001d002038 // …
GO:0016791		phosphatase activity	43	1317	512	30113	9.3e-05	0.0059	2.22915	// Zm00001d044693 // Zm00001d050026 // Zm00001d029419 // Zm00001d035614 // Zm00001d030765 // Zm00001d011734 // Zm00001d044301 // Zm00001d011131 // Zm00001d024821 // Zm00001d042886 // Zm00001d012401 // Zm00001d038366 // Zm00001d009844 // Zm00001d020396 // Zm00001d028366 // Zm00001d039582 // Zm00001d010520 // Zm00001d053313 // Zm00001d035600 // Zm00001d011495 // Zm00001d046377 // Zm00001d047110 // …
GO:0016758		transferase activity, transferring hexosyl groups	50	1317	629	30113	9.3e-05	0.0059	2.22915	// Zm00001d038764 // Zm00001d032222 // Zm00001d041608 // Zm00001d031300 // Zm00001d037480 // Zm00001d050125 // Zm00001d000002 // Zm00001d002579 // Zm00001d039642 // Zm00001d045261 // Zm00001d007571 // Zm00001d039685 // Zm00001d008568 // Zm00001d043166 // Zm00001d042353 // Zm00001d019259 // Zm00001d045055 // Zm00001d006683 // Zm00001d020392 // Zm00001d019163 // Zm00001d019254 // Zm00001d016684 // …
GO:0015291		secondary active transmembrane transporter activity	38	1317	432	30113	9.7e-05	0.0059	2.22915	// Zm00001d045883 // Zm00001d000204 // Zm00001d053234 // Zm00001d046383 // Zm00001d038181 // Zm00001d038180 // Zm00001d013810 // Zm00001d009494 // Zm00001d038186 // Zm00001d023941 // Zm00001d045667 // Zm00001d006171 // Zm00001d044513 // Zm00001d028151 // Zm00001d000195 // Zm00001d009028 // Zm00001d027700 // Zm00001d027982 // Zm00001d015964 // Zm00001d035115 // Zm00001d012522 // Zm00001d048178 // …
GO:0022804		active transmembrane transporter activity	56	1317	751	30113	0.00017	0.01	2	// Zm00001d045883 // Zm00001d000204 // Zm00001d053234 // Zm00001d038576 // Zm00001d046383 // Zm00001d038181 // Zm00001d038180 // Zm00001d013810 // Zm00001d009494 // Zm00001d028151 // Zm00001d044476 // Zm00001d038186 // Zm00001d023941 // Zm00001d045667 // Zm00001d034940 // Zm00001d006171 // Zm00001d044513 // Zm00001d011315 // Zm00001d028689 // Zm00001d000195 // Zm00001d009028 // Zm00001d027700 // …
GO:0016705		oxidoreductase activity, acting on paired donors, with incorporation or reduction of molecular oxygen	39	1317	464	30113	0.00019	0.011	1.95861	// Zm00001d046493 // Zm00001d052530 // Zm00001d046603 // Zm00001d014134 // Zm00001d048702 // Zm00001d012304 // Zm00001d003512 // Zm00001d003349 // Zm00001d013230 // Zm00001d001960 // Zm00001d002687 // Zm00001d030851 // Zm00001d013979 // Zm00001d034096 // Zm00001d034097 // Zm00001d048703 // Zm00001d032651 // Zm00001d044146 // Zm00001d006649 // Zm00001d047830 // Zm00001d042026 // Zm00001d034095 // …
GO:0090484		drug transporter activity	11	1317	63	30113	0.00025	0.013	1.88606	// Zm00001d035115 // Zm00001d009494 // Zm00001d006171 // Zm00001d053234 // Zm00001d000195 // Zm00001d004055 // Zm00001d013810 // Zm00001d027982 // Zm00001d015964 // Zm00001d002658 // Zm00001d008974
GO:0015238		drug transmembrane transporter activity	11	1317	63	30113	0.00025	0.013	1.88606	// Zm00001d035115 // Zm00001d009494 // Zm00001d006171 // Zm00001d053234 // Zm00001d000195 // Zm00001d004055 // Zm00001d013810 // Zm00001d027982 // Zm00001d015964 // Zm00001d002658 // Zm00001d008974
GO:0005384		manganese ion transmembrane transporter activity	7	1317	25	30113	0.0003	0.015	1.82391	// Zm00001d020395 // Zm00001d033625 // Zm00001d019327 // Zm00001d035875 // Zm00001d007397 // Zm00001d008963 // Zm00001d015133
GO:0042578		phosphoric ester hydrolase activity	45	1317	587	30113	0.00042	0.021	1.67778	// Zm00001d044693 // Zm00001d050026 // Zm00001d029419 // Zm00001d035614 // Zm00001d030765 // Zm00001d011734 // Zm00001d044301 // Zm00001d011131 // Zm00001d024821 // Zm00001d042886 // Zm00001d012401 // Zm00001d038366 // Zm00001d009844 // Zm00001d020396 // Zm00001d028366 // Zm00001d039582 // Zm00001d010520 // Zm00001d053313 // Zm00001d035600 // Zm00001d011495 // Zm00001d046377 // Zm00001d047110 // …
GO:0016757		transferase activity, transferring glycosyl groups	64	1317	928	30113	0.00046	0.022	1.65758	// Zm00001d038764 // Zm00001d031303 // Zm00001d041608 // Zm00001d014722 // Zm00001d031300 // Zm00001d022349 // Zm00001d037480 // Zm00001d000237 // Zm00001d050125 // Zm00001d000002 // Zm00001d002579 // Zm00001d039642 // Zm00001d045261 // Zm00001d007571 // Zm00001d039685 // Zm00001d008568 // Zm00001d043166 // Zm00001d042353 // Zm00001d038263 // Zm00001d019259 // Zm00001d004248 // Zm00001d045042 // …
GO:0015295		solute:proton symporter activity	18	1317	160	30113	0.00052	0.024	1.61979	// Zm00001d045667 // Zm00001d017714 // Zm00001d030464 // Zm00001d021943 // Zm00001d048178 // Zm00001d005594 // Zm00001d038334 // Zm00001d018627 // Zm00001d038186 // Zm00001d030158 // Zm00001d046383 // Zm00001d000072 // Zm00001d023941 // Zm00001d038180 // Zm00001d038181 // Zm00001d028151 // Zm00001d016982 // Zm00001d048776
GO:0008171		O-methyltransferase activity	10	1317	59	30113	0.00058	0.026	1.58503	// Zm00001d051870 // Zm00001d053156 // Zm00001d049265 // Zm00001d049181 // Zm00001d029359 // Zm00001d010736 // Zm00001d029356 // Zm00001d032083 // Zm00001d004921 // Zm00001d038700
GO:0046914		transition metal ion binding	87	1317	1379	30113	0.00072	0.032	1.49485	// Zm00001d014055 // Zm00001d025984 // Zm00001d042848 // Zm00001d012304 // Zm00001d003349 // Zm00001d044099 // Zm00001d034096 // Zm00001d034097 // Zm00001d032651 // Zm00001d017251 // Zm00001d032810 // Zm00001d053675 // Zm00001d042026 // Zm00001d044146 // Zm00001d014121 // Zm00001d026635 // Zm00001d044703 // Zm00001d028419 // Zm00001d017612 // Zm00001d017147 // Zm00001d048759 // Zm00001d026029 // …
GO:0004724		magnesium-dependent protein serine/threonine phosphatase activity	14	1317	112	30113	0.00083	0.036	1.4437	// Zm00001d044301 // Zm00001d029419 // Zm00001d005609 // Zm00001d020100 // Zm00001d038846 // Zm00001d011202 // Zm00001d028574 // Zm00001d011131 // Zm00001d031329 // Zm00001d042886 // Zm00001d011495 // Zm00001d009626 // Zm00001d012401 // Zm00001d025055
GO:0046527		glucosyltransferase activity	22	1317	231	30113	0.0011	0.044	1.35655	// Zm00001d000002 // Zm00001d039642 // Zm00001d045261 // Zm00001d043166 // Zm00001d045055 // Zm00001d019259 // Zm00001d042353 // Zm00001d006683 // Zm00001d019254 // Zm00001d012036 // Zm00001d029620 // Zm00001d049925 // Zm00001d029087 // Zm00001d000237 // Zm00001d052480 // Zm00001d045042 // Zm00001d019265 // Zm00001d002256 // Zm00001d029091 // Zm00001d050125 // Zm00001d025933 // Zm00001d041972
GO:0035251		UDP-glucosyltransferase activity	21	1317	216	30113	0.0011	0.044	1.35655	// Zm00001d019259 // Zm00001d019265 // Zm00001d045042 // Zm00001d045055 // Zm00001d006683 // Zm00001d002256 // Zm00001d029091 // Zm00001d000237 // Zm00001d041972 // Zm00001d019254 // Zm00001d039642 // Zm00001d050125 // Zm00001d000002 // Zm00001d052480 // Zm00001d012036 // Zm00001d029620 // Zm00001d045261 // Zm00001d029087 // Zm00001d043166 // Zm00001d042353 // Zm00001d049925
GO:0015294		solute:cation symporter activity	18	1317	173	30113	0.0012	0.047	1.3279	// Zm00001d045667 // Zm00001d017714 // Zm00001d030464 // Zm00001d021943 // Zm00001d048178 // Zm00001d005594 // Zm00001d038334 // Zm00001d018627 // Zm00001d038186 // Zm00001d030158 // Zm00001d046383 // Zm00001d000072 // Zm00001d023941 // Zm00001d038180 // Zm00001d038181 // Zm00001d028151 // Zm00001d016982 // Zm00001d048776
GO:0005576	Cellular Component	extracellular region	83	1317	680	30113	2.4e-15	1.2e-12	11.9208	// Zm00001d035558 // Zm00001d037359 // Zm00001d047970 // Zm00001d002898 // Zm00001d007160 // Zm00001d044771 // Zm00001d040028 // Zm00001d014055 // Zm00001d006933 // Zm00001d032881 // Zm00001d052264 // Zm00001d034663 // Zm00001d040399 // Zm00001d016185 // Zm00001d018323 // Zm00001d043048 // Zm00001d042848 // Zm00001d029558 // Zm00001d040027 // Zm00001d041827 // Zm00001d045210 // Zm00001d006936 // …
GO:0071944		cell periphery	196	1317	2533	30113	3.7e-14	9.3e-12	11.0315	// Zm00001d006936 // Zm00001d030361 // Zm00001d045883 // Zm00001d002898 // Zm00001d023593 // Zm00001d051415 // Zm00001d043523 // Zm00001d050577 // Zm00001d000434 // Zm00001d002295 // Zm00001d027718 // Zm00001d025665 // Zm00001d043047 // Zm00001d048728 // Zm00001d045667 // Zm00001d023936 // Zm00001d034940 // Zm00001d048727 // Zm00001d016530 // Zm00001d046561 // Zm00001d053313 // Zm00001d020429 // …
GO:0005886		plasma membrane	154	1317	2048	30113	2.1e-10	3.5e-08	7.45593	// Zm00001d030361 // Zm00001d045883 // Zm00001d023593 // Zm00001d051415 // Zm00001d050577 // Zm00001d000434 // Zm00001d025665 // Zm00001d048728 // Zm00001d045667 // Zm00001d023936 // Zm00001d034940 // Zm00001d048727 // Zm00001d016530 // Zm00001d046561 // Zm00001d002658 // Zm00001d035157 // Zm00001d022044 // Zm00001d009010 // Zm00001d051174 // Zm00001d020555 // Zm00001d021656 // Zm00001d020927 // …
GO:0030312		external encapsulating structure	42	1317	400	30113	8.1e-07	8.2e-05	4.08619	// Zm00001d002898 // Zm00001d023715 // Zm00001d036483 // Zm00001d032881 // Zm00001d052264 // Zm00001d034663 // Zm00001d040399 // Zm00001d010212 // Zm00001d027718 // Zm00001d041827 // Zm00001d043047 // Zm00001d009138 // Zm00001d047353 // Zm00001d006243 // Zm00001d020392 // Zm00001d018404 // Zm00001d006936 // Zm00001d028689 // Zm00001d040581 // Zm00001d018031 // Zm00001d024735 // Zm00001d014613 // …
GO:0005618		cell wall	42	1317	400	30113	8.1e-07	8.2e-05	4.08619	// Zm00001d002898 // Zm00001d023715 // Zm00001d036483 // Zm00001d032881 // Zm00001d052264 // Zm00001d034663 // Zm00001d040399 // Zm00001d010212 // Zm00001d027718 // Zm00001d041827 // Zm00001d043047 // Zm00001d009138 // Zm00001d047353 // Zm00001d006243 // Zm00001d020392 // Zm00001d018404 // Zm00001d006936 // Zm00001d028689 // Zm00001d040581 // Zm00001d018031 // Zm00001d024735 // Zm00001d014613 // …
GO:0031226		intrinsic component of plasma membrane	38	1317	383	30113	8.9e-06	0.00074	3.13077	// Zm00001d049218 // Zm00001d030361 // Zm00001d041608 // Zm00001d034763 // Zm00001d038049 // Zm00001d002607 // Zm00001d045680 // Zm00001d038577 // Zm00001d038576 // Zm00001d019994 // Zm00001d014463 // Zm00001d023941 // Zm00001d007896 // Zm00001d028151 // Zm00001d015921 // Zm00001d031257 // Zm00001d029313 // Zm00001d014166 // Zm00001d042140 // Zm00001d048178 // Zm00001d005594 // Zm00001d021674 // …
GO:0046658		anchored component of plasma membrane	22	1317	187	30113	7.3e-05	0.0052	2.284	// Zm00001d030361 // Zm00001d034763 // Zm00001d038049 // Zm00001d002607 // Zm00001d045680 // Zm00001d038577 // Zm00001d019994 // Zm00001d014463 // Zm00001d007896 // Zm00001d015921 // Zm00001d031257 // Zm00001d029313 // Zm00001d009010 // Zm00001d042140 // Zm00001d021674 // Zm00001d047399 // Zm00001d040504 // Zm00001d002773 // Zm00001d037915 // Zm00001d004763 // Zm00001d027471 // Zm00001d044700
GO:0031225		anchored component of membrane	22	1317	191	30113	9.7e-05	0.0061	2.21467	// Zm00001d030361 // Zm00001d034763 // Zm00001d038049 // Zm00001d002607 // Zm00001d045680 // Zm00001d038577 // Zm00001d019994 // Zm00001d014463 // Zm00001d007896 // Zm00001d015921 // Zm00001d031257 // Zm00001d029313 // Zm00001d009010 // Zm00001d042140 // Zm00001d021674 // Zm00001d047399 // Zm00001d040504 // Zm00001d002773 // Zm00001d037915 // Zm00001d004763 // Zm00001d027471 // Zm00001d044700
GO:0030054		cell junction	42	1317	529	30113	0.00033	0.013	1.88606	// Zm00001d002898 // Zm00001d000204 // Zm00001d006933 // Zm00001d034763 // Zm00001d037480 // Zm00001d040399 // Zm00001d041236 // Zm00001d002287 // Zm00001d041827 // Zm00001d048962 // Zm00001d019563 // Zm00001d025799 // Zm00001d005252 // Zm00001d020171 // Zm00001d040581 // Zm00001d024735 // Zm00001d009247 // Zm00001d024738 // Zm00001d040702 // Zm00001d035055 // Zm00001d022044 // Zm00001d008730 // …
GO:0055044		symplast	42	1317	529	30113	0.00033	0.013	1.88606	// Zm00001d002898 // Zm00001d000204 // Zm00001d006933 // Zm00001d034763 // Zm00001d037480 // Zm00001d040399 // Zm00001d041236 // Zm00001d002287 // Zm00001d041827 // Zm00001d048962 // Zm00001d019563 // Zm00001d025799 // Zm00001d005252 // Zm00001d020171 // Zm00001d040581 // Zm00001d024735 // Zm00001d009247 // Zm00001d024738 // Zm00001d040702 // Zm00001d035055 // Zm00001d022044 // Zm00001d008730 // …
GO:0005911		cell-cell junction	42	1317	529	30113	0.00033	0.013	1.88606	// Zm00001d002898 // Zm00001d000204 // Zm00001d006933 // Zm00001d034763 // Zm00001d037480 // Zm00001d040399 // Zm00001d041236 // Zm00001d002287 // Zm00001d041827 // Zm00001d048962 // Zm00001d019563 // Zm00001d025799 // Zm00001d005252 // Zm00001d020171 // Zm00001d040581 // Zm00001d024735 // Zm00001d009247 // Zm00001d024738 // Zm00001d040702 // Zm00001d035055 // Zm00001d022044 // Zm00001d008730 // …
GO:0009506		plasmodesma	42	1317	529	30113	0.00033	0.013	1.88606	// Zm00001d002898 // Zm00001d000204 // Zm00001d006933 // Zm00001d034763 // Zm00001d037480 // Zm00001d040399 // Zm00001d041236 // Zm00001d002287 // Zm00001d041827 // Zm00001d048962 // Zm00001d019563 // Zm00001d025799 // Zm00001d005252 // Zm00001d020171 // Zm00001d040581 // Zm00001d024735 // Zm00001d009247 // Zm00001d024738 // Zm00001d040702 // Zm00001d035055 // Zm00001d022044 // Zm00001d008730 // …
GO:0044459		plasma membrane part	38	1317	462	30113	0.00034	0.013	1.88606	// Zm00001d049218 // Zm00001d030361 // Zm00001d041608 // Zm00001d034763 // Zm00001d038049 // Zm00001d002607 // Zm00001d045680 // Zm00001d038577 // Zm00001d038576 // Zm00001d019994 // Zm00001d014463 // Zm00001d023941 // Zm00001d007896 // Zm00001d028151 // Zm00001d015921 // Zm00001d031257 // Zm00001d029313 // Zm00001d014166 // Zm00001d042140 // Zm00001d048178 // Zm00001d005594 // Zm00001d021674 // …
GO:0048046		apoplast	17	1317	159	30113	0.0012	0.044	1.35655	// Zm00001d035558 // Zm00001d043019 // Zm00001d045210 // Zm00001d020392 // Zm00001d017699 // Zm00001d011069 // Zm00001d012477 // Zm00001d035561 // Zm00001d035562 // Zm00001d009309 // Zm00001d042848 // Zm00001d032608 // Zm00001d014613 // Zm00001d042905 // Zm00001d027313 // Zm00001d047970 // Zm00001d014617
