# Supplementary material for: Comparative Transcriptomics Reveal Metabolic Rather than Genetic Control of Divergent Antioxidant Metabolism in the Primary Root Elongation Zone of Water-Stressed Cotton and Maize
Source: Antioxidants (Basel). 2023 Jan 27;12(2):287. doi: 10.3390/antiox12020287 (PMC9952253; doi:10.3390/antiox12020287)
Supplement: Supplementary file 1 [file antioxidants-12-00287-s001.zip › Table S1.xlsx]

## Sheet: Table S1
Supplemental Table S1. Ratios of transcript abundance in each comparison of DATs that significantly changed in cotton primary roots in response to water-deficit stress.DATs have to be significantly increased or decreased in comparisons of WS48/WW24 and WS48/WW48 to be included. Yellow cells indicate the abundance was increased in the water-stressed treatment. Blue cells indicate the abundance was…
Cotton ID	WS48/WW24log2FC	WS48/WW48log2FC	Function	WS24/WW24log2FC
Gh_A11G1914	1.13	1.223	1-amino-cyclopropane-1-carboxylate synthase 8	2.091
Gh_D10G1825	2.136	2.075	1-cysteine peroxiredoxin 1	2.483
Gh_A09G0562	3.757	8.925	2-oxoglutarate (2OG) and Fe(II)-dependent oxygenase superfamily protein	3.128
Gh_D08G1164	9.406	6.027	2-oxoglutarate (2OG) and Fe(II)-dependent oxygenase superfamily protein	5.341
Gh_D13G1619	1.72	2.061	2-oxoglutarate (2OG) and Fe(II)-dependent oxygenase superfamily protein	1.825
Gh_A13G1315	1.694	1.59	2-oxoglutarate (2OG) and Fe(II)-dependent oxygenase superfamily protein	1.853
Gh_A08G1958	1.345	1.263	2-oxoglutarate (2OG) and Fe(II)-dependent oxygenase superfamily protein	1.246
Gh_A01G1268	1.729	1.209	ABC-2 type transporter family protein	1.528
Gh_D13G0860	3.265	3.065	ABI five binding protein 2	3.873
Gh_A13G0736	2.627	2.63	ABI five binding protein 2	3.484
Gh_A12G1474	2.141	1.814	ABI five binding protein 2	2.926
Gh_D12G1599	1.437	1.229	ABI five binding protein 2	2.149
Gh_Sca004961G01	1.459	1.606	ABI five binding protein 3	1.999
Gh_A03G0442	1.858	1.504	ABL interactor-like protein 2	2.28
Gh_D05G2495	2.696	2.128	abscisic acid responsive elements-binding factor 2	3.091
Gh_A05G2234	1.385	1.191	abscisic acid responsive elements-binding factor 2	1.79
Gh_A05G2294	2.668	2.01	acetyl-CoA carboxylase 1	2.548
Gh_A10G1517	2.407	1.305	acyl-activating enzyme 7	1.213
Gh_D13G0930	1.625	1.892	Adenosylmethionine decarboxylase family protein	1.733
Gh_A05G1645	1.749	2.033	ADPGLC-PPase large subunit	1.63
Gh_A05G0561	1.561	1.191	AGC (cAMP-dependent, cGMP-dependent and protein kinase C) kinase family protein	1.594
Gh_D11G0606	2.472	2.831	alcohol dehydrogenase 1	2.157
Gh_D11G0441	1.878	2.325	aldehyde dehydrogenase 10A8	2.277
Gh_A11G0380	1.731	1.765	aldehyde dehydrogenase 10A8	1.795
Gh_D03G0856	1.357	1.144	aldehyde dehydrogenase 12A1	1.434
Gh_A09G1570	4.348	3.7	alpha/beta-Hydrolases superfamily protein	5.473
Gh_D09G1641	1.999	2.256	alpha/beta-Hydrolases superfamily protein	2.387
Gh_A11G0478	2.004	1.669	alpha/beta-Hydrolases superfamily protein	2.595
Gh_D13G1030	2.266	1.293	alpha/beta-Hydrolases superfamily protein	2.562
Gh_A13G1960	2.088	1.935	alpha-glucan phosphorylase 2	2.491
Gh_D05G1513	1.209	1.18	alpha-glucan phosphorylase 2	1.385
Gh_D04G1129	1.351	1.998	aluminum sensitive 3	1.779
Gh_D04G0054	1.007	1.388	AMP-dependent synthetase and ligase family protein	1.54
Gh_A11G2228	2.104	3.406	Ankyrin repeat family protein	3.066
Gh_D04G0670	1.378	1.083	Ankyrin repeat family protein	1.635
Gh_D01G2375	2.548	1.693	AP2/B3-like transcriptional factor family protein	2.787
Gh_D02G2193	1.596	2.492	arginine decarboxylase 2	2.145
Gh_A10G0435	1.294	1.19	ATPase E1-E2 type family protein / haloacid dehalogenase-like hydrolase family protein	1.219
Gh_D05G2623	1.146	1.242	ATP-binding casette family G25	1.218
Gh_A03G1429	2.105	2.333	Auxin-responsive GH3 family protein	1.918
Gh_D01G1682	3.239	1.686	basic chitinase	2.68
Gh_A11G0909	3.13	2.986	Basic helix-loop-helix (bHLH) DNA-binding family protein	2.744
Gh_D11G1055	1.808	2.213	Basic helix-loop-helix (bHLH) DNA-binding family protein	1.735
Gh_D06G1739	2.717	2.652	basic helix-loop-helix (bHLH) DNA-binding superfamily protein	3.648
Gh_A05G0559	1.58	1.53	basic helix-loop-helix (bHLH) DNA-binding superfamily protein	1.687
Gh_D05G0688	1.341	1.382	basic helix-loop-helix (bHLH) DNA-binding superfamily protein	1.519
Gh_A04G0927	2.611	3.383	B-box type zinc finger family protein	2.774
Gh_A09G0940	1.895	2.572	BEL1-like homeodomain 1	1.731
Gh_D09G0967	2.482	1.479	BEL1-like homeodomain 1	1.328
Gh_D01G1966	1.624	1.096	BEL1-like homeodomain 1	1.687
Gh_D09G0578	4.571	3.445	beta-amylase 1	5.227
Gh_D10G1605	1.769	2.497	beta-amylase 1	1.849
Gh_D01G1342	10.162	10.162	Bifunctional inhibitor/lipid-transfer protein/seed storage 2S albumin superfamily protein	10.244
Gh_A01G1193	6.757	6.25	Bifunctional inhibitor/lipid-transfer protein/seed storage 2S albumin superfamily protein	6.204
Gh_D11G3313	4	4.416	Bifunctional inhibitor/lipid-transfer protein/seed storage 2S albumin superfamily protein	3.737
Gh_D02G1993	1.489	1.878	Bifunctional inhibitor/lipid-transfer protein/seed storage 2S albumin superfamily protein	1.549
Gh_D02G1122	1.088	2.14	binding	2.403
Gh_A04G0030	1.25	1.33	BTB/POZ domain-containing protein	1.416
Gh_A08G1633	1.842	2.057	C2 calcium/lipid-binding plant phosphoribosyltransferase family protein	1.896
Gh_D08G1951	1.656	1.826	C2 calcium/lipid-binding plant phosphoribosyltransferase family protein	1.374
Gh_A12G1487	1.7	2.539	C2H2-like zinc finger protein	2.275
Gh_D12G1613	1.774	2.232	C2H2-like zinc finger protein	2.375
Gh_A09G0410	3.428	2.953	Calcium-dependent lipid-binding (CaLB domain) family protein	3.591
Gh_D10G1822	1.119	1.187	calcium-dependent lipid-binding family protein	1.227
Gh_D03G0027	1.002	1.037	Calcium-dependent phosphotriesterase superfamily protein	1.187
Gh_A12G1768	2.438	3.254	calnexin 1	2.353
Gh_A12G2329	9.749	9.749	CAP160 protein	9.169
Gh_A11G2945	1.811	1.343	Carbohydrate-binding-like fold	1.71
Gh_D04G0517	10.109	10.109	carbonic anhydrase 1	11.073
Gh_A12G2477	2.06	1.253	carbonic anhydrase 2	1.341
Gh_D10G1040	1.03	1.516	carboxyesterase 18	1.319
Gh_D11G1220	1.672	1.311	catalytics	1.843
Gh_A11G1067	1.656	1.264	catalytics	1.873
Gh_D09G2429	2.331	1.978	catalytics;carbohydrate kinases;phosphoglucan, water dikinases	2.765
Gh_A13G1847	1.873	2.672	Cation efflux family protein	2.55
Gh_D01G2147	1.834	1.528	cation/H+ exchanger 20	1.78
Gh_D06G1080	1.326	1.401	CBL-interacting protein kinase 25	1.877
Gh_A01G1510	1.069	1.022	CBS domain-containing protein with a domain of unknown function (DUF21)	1.29
Gh_D13G2076	3.137	1.837	CCCH-type zinc finger family protein	2.127
Gh_A08G2176	2.994	2.357	CCCH-type zinc finger family protein	2.822
Gh_D08G2541	1.762	1.288	CCCH-type zinc finger family protein	1.828
Gh_A05G2362	1.578	1.403	cellulase 3	1.852
Gh_D05G2628	1.27	1.345	cellulase 3	1.547
Gh_A05G2361	1.068	1.098	cellulase 3	1.453
Gh_A12G2148	2.656	1.095	cellulose synthase like G3	2.742
Gh_D08G1052	2.244	3.212	chitinase A	2.062
Gh_A08G0872	2.017	2.628	chitinase A	1.43
Gh_A13G0950	1.077	1.121	chloroplastic acetylcoenzyme A carboxylase 1	1.009
Gh_A09G0755	1.557	1.085	cold regulated 314 thylakoid membrane 2	1.237
Gh_A12G0270	1.289	1.389	cold-regulated 413-plasma membrane 2	1.633
Gh_D08G0269	1.307	2.295	CONSTANS-like 5	1.982
Gh_D03G1150	9.854	9.854	copper transporter 1	6.991
Gh_D13G2024	5.418	3.446	copper transporter 5	4.723
Gh_D13G2534	2.001	1.801	CYCLIN D1;1	1.882
Gh_D11G2848	2.164	2.146	Cysteine/Histidine-rich C1 domain family protein	1.805
Gh_A06G1918	2.035	1.386	Cytochrome P450 superfamily protein	2.301
Gh_D08G2495	1.313	1.204	Cytochrome P450 superfamily protein	1.086
Gh_D07G0979	1.066	2.589	cytochrome P450, family 707, subfamily A, polypeptide 2	1.995
Gh_D09G0470	1.128	1.298	cytochrome P450, family 71, subfamily B, polypeptide 34	1.194
Gh_D05G1751	4.622	2.099	DC1 domain-containing protein	4.083
Gh_A12G2382	1.245	2.386	DEAD box RNA helicase (PRH75)	1.294
Gh_D11G1826	6.651	6.693	Dehydrin family protein	7.076
Gh_A01G1899	11.621	9.691	delta 1-pyrroline-5-carboxylate synthase 2	10.543
Gh_A04G1396	3.363	3.847	delta1-pyrroline-5-carboxylate synthase 1	3.675
Gh_D04G1204	3.328	3.799	delta1-pyrroline-5-carboxylate synthase 1	3.715
Gh_D12G0138	3.245	3.068	dentin sialophosphoprotein-related	3.117
Gh_A12G0121	2.252	2.004	dentin sialophosphoprotein-related	2.08
Gh_D01G1828	2.84	1.735	dicarboxylate diiron protein, putative (Crd1)	3.322
Gh_A02G0642	2.228	1.898	DNAse I-like superfamily protein	2.523
Gh_D02G0689	2.131	1.658	DNAse I-like superfamily protein	2.014
Gh_A08G1663	1.876	1.147	DNAse I-like superfamily protein	1.912
Gh_D05G2918	1.681	1.069	Double Clp-N motif-containing P-loop nucleoside triphosphate hydrolases superfamily protein	1.76
Gh_D05G0624	1.124	1.126	EamA-like transporter family	1.058
Gh_D05G0733	1.078	1.647	early nodulin-like protein 18	1.442
Gh_D12G0051	2.451	2.212	EID1-like 3	2.852
Gh_A12G0036	1.718	1.963	EID1-like 3	1.905
Gh_D08G1992	1.738	1.523	EID1-like 3	1.981
Gh_A08G1659	2.441	1.392	EID1-like 3	2.37
Gh_A07G2128	1.5	1.152	Endosomal targeting BRO1-like domain-containing protein	1.286
Gh_D07G1882	1.786	1.703	ERD (early-responsive to dehydration stress) family protein	1.727
Gh_A07G1673	1.193	1.552	ERD (early-responsive to dehydration stress) family protein	1.144
Gh_A09G1276	1.269	1.595	Eukaryotic aspartyl protease family protein	1.521
Gh_A03G0586	1.201	1.299	eukaryotic release factor 1-3	1.339
Gh_A05G0839	1.694	2.333	exocyst subunit exo70 family protein H7	1.508
Gh_D05G3898	1.668	1.685	exocyst subunit exo70 family protein H7	1.67
Gh_A13G0672	3.761	3.325	expansin A10	4.205
Gh_D13G0786	4.142	2.977	expansin A10	4.51
Gh_D02G1269	1.436	1.416	expansin A15	1.862
Gh_A10G1606	2.257	2.717	expansin A8	3.367
Gh_A13G0050	1.479	2.255	expansin A8	2.44
Gh_D03G1609	10.862	10.862	expansin-like B1	9.222
Gh_A03G0046	10.518	10.518	expansin-like B1	9.634
Gh_A11G2748	1.696	1.624	F-box family protein	1.739
Gh_D11G3338	1.851	1.211	F-box family protein	1.63
Gh_A05G2041	1.373	1.24	F-box/RNI-like superfamily protein	1.468
Gh_D05G2285	2.649	1.171	F-box/RNI-like superfamily protein	2.908
Gh_D07G0457	3.408	2.909	Fe superoxide dismutase 2	3.226
Gh_A01G0491	1.572	1.17	G protein coupled receptor	1.948
Gh_D01G0507	1.392	1.084	G protein coupled receptor	1.717
Gh_D07G1285	2.101	1.959	galactinol synthase 1	1.428
Gh_A11G0980	2.165	1.654	galactinol synthase 1	1.284
Gh_D11G1131	1.823	1.13	galactinol synthase 1	1.305
Gh_A09G2130	4.812	5.674	galactinol synthase 2	4.155
Gh_D09G2336	3.378	2.65	galactinol synthase 2	2.822
Gh_A13G0935	2.887	2.472	galactinol synthase 2	3.665
Gh_A08G0764	1.291	1.197	Galactosyltransferase family protein	1.239
Gh_D12G1288	1.472	2.195	galacturonosyltransferase-like 7	1.806
Gh_D13G1675	2.749	1.405	gamma-tocopherol methyltransferase	1.604
Gh_D06G0967	1.237	1.258	GATA transcription factor 12	1.467
Gh_D07G1903	2.393	3.471	GDSL-like Lipase/Acylhydrolase superfamily protein	3.439
Gh_A03G0556	1.562	2.213	GDSL-like Lipase/Acylhydrolase superfamily protein	1.81
Gh_A03G1163	2.037	1.875	GDSL-like Lipase/Acylhydrolase superfamily protein	1.91
Gh_A01G1866	1.29	1.314	geranylgeranyl pyrophosphate synthase 1	1.435
Gh_A02G1055	1.56	3.221	Gibberellin-regulated family protein	2.91
Gh_D02G0690	1.534	1.45	gigantea protein (GI)	1.709
Gh_D02G2156	1.386	1.234	Glucose-1-phosphate adenylyltransferase family protein	1.396
Gh_A03G1723	1.145	1.083	Glucose-1-phosphate adenylyltransferase family protein	1.003
Gh_A06G1287	2.74	3.177	glucose-6-phosphate/phosphate translocator 2	3.292
Gh_D04G1043	1.022	1.048	glutamate-ammonia ligases;catalytics;glutamate-ammonia ligases	1.216
Gh_D03G1519	1.026	1.931	glycine-rich protein	1.863
Gh_A03G2014	1.561	1.915	glycine-rich protein	2.249
Gh_A01G1238	1.395	1.745	glycosyl hydrolase 9B1	1.95
Gh_D07G0837	2.034	2.082	glycosyl hydrolase 9B8	1.972
Gh_A07G0769	1.353	1.723	glycosyl hydrolase 9B8	1.517
Gh_A10G2145	1.888	1.217	Glycosyl hydrolase family 85	1.522
Gh_D13G0676	1.405	1.328	Glycosyl hydrolase superfamily protein	2.008
Gh_A09G1747	2.215	3.676	Glycosyl hydrolases family 32 protein (invertase)	2.563
Gh_D09G1856	2.975	2.042	Glycosyl hydrolases family 32 protein (invertase)	3.061
Gh_D09G0097	1.686	1.987	Glycosyl transferase, family 35	1.992
Gh_D12G2512	1.325	1.987	glycosyltransferase 18	1.53
Gh_A12G2384	1.399	1.816	glycosyltransferase 18	1.69
Gh_D11G0077	2.479	1.775	glycosyltransferase 18	2.507
Gh_A11G0073	1.23	1.67	glycosyltransferase 18	1.475
Gh_A08G0006	2.042	2.107	Haloacid dehalogenase-like hydrolase (HAD) superfamily protein	2.833
Gh_A11G3117	2.61	2.049	Haloacid dehalogenase-like hydrolase (HAD) superfamily protein	3.137
Gh_D11G2201	2.997	1.749	Haloacid dehalogenase-like hydrolase (HAD) superfamily protein	3.385
Gh_A12G1924	1.291	1.084	Haloacid dehalogenase-like hydrolase (HAD) superfamily protein	1.112
Gh_D07G0689	1.514	2.497	heat shock protein 101	1.909
Gh_A13G2046	3.622	3.556	heat shock protein 70	3.505
Gh_D13G2018	2.114	2.434	heat shock transcription factor A2	2.708
Gh_A13G1655	2.102	2.122	heat shock transcription factor A2	2.497
Gh_A01G1576	3.633	3.139	Heavy metal transport/detoxification superfamily protein	3.626
Gh_A05G1510	4.017	1.942	Heavy metal transport/detoxification superfamily protein	3.04
Gh_D12G1248	6.695	4.99	heme binding	5.931
Gh_Sca010075G01	1.12	1.197	heptahelical transmembrane protein2	1.141
Gh_Sca007466G01	1.081	1.085	heptahelical transmembrane protein2	1.38
Gh_D12G0090	2.74	1.817	high affinity K+ transporter 5	2.115
Gh_A12G0074	2.461	1.482	high affinity K+ transporter 5	1.164
Gh_A12G2274	4.178	6.108	highly ABA-induced PP2C gene 1	4.291
Gh_A05G3590	5.217	4.066	highly ABA-induced PP2C gene 1	5.754
Gh_A05G0782	7.575	8.411	highly ABA-induced PP2C gene 2	7.447
Gh_A09G1649	5.765	5.786	highly ABA-induced PP2C gene 2	5.777
Gh_D05G3907	5.643	5.706	highly ABA-induced PP2C gene 2	5.792
Gh_A13G0184	2.882	2.762	highly ABA-induced PP2C gene 2	2.368
Gh_D07G1346	2.566	1.834	homeobox 7	2.544
Gh_A07G1237	2.756	1.515	homeobox 7	2.624
Gh_D09G1210	1.858	1.116	homeobox from Arabidopsis thaliana	1.72
Gh_A12G1858	1.392	1.791	Homeodomain-like superfamily protein	2.257
Gh_D07G0614	1.77	1.356	Homeodomain-like superfamily protein	2.193
Gh_D12G1184	2.238	1.096	Homeodomain-like superfamily protein	2.776
Gh_A07G0547	1.383	1.093	Homeodomain-like superfamily protein	2.014
Gh_A12G1061	1.311	1.062	Homeodomain-like superfamily protein	1.721
Gh_A05G1144	1.986	3.562	HSP20-like chaperones superfamily protein	3.137
Gh_D05G1321	1.586	2.818	HSP20-like chaperones superfamily protein	2.518
Gh_D12G1888	1.278	1.067	HVA22 homologue E	1.189
Gh_D01G1091	4.346	4.435	HXXXD-type acyl-transferase family protein	4.044
Gh_A01G1047	2.371	2.078	HXXXD-type acyl-transferase family protein	2.187
Gh_D02G1563	1.399	1.91	HXXXD-type acyl-transferase family protein	1.523
Gh_A10G2086	1.713	1.35	HXXXD-type acyl-transferase family protein	1.589
Gh_D05G0541	2.48	2.102	hydroxycinnamoyl-CoA shikimate/quinate hydroxycinnamoyl transferase	1.785
Gh_A02G0595	1.714	1.172	hydroxyproline-rich glycoprotein family protein	1.941
Gh_D08G2503	4.574	1.231	indoleacetic acid-induced protein 16	3.962
Gh_A06G1924	1.708	1.916	Integrase-type DNA-binding superfamily protein	2.462
Gh_D09G0575	3.069	1.592	isopropyl malate isomerase large subunit 1	1.515
Gh_D10G2219	9.882	9.15	Kunitz family trypsin and protease inhibitor protein	7.249
Gh_D10G2220	6.035	8.808	Kunitz family trypsin and protease inhibitor protein	6.642
Gh_A07G1025	1.143	1.22	Late embryogenesis abundant (LEA) hydroxyproline-rich glycoprotein family	1.023
Gh_D07G1101	1.711	1.058	Late embryogenesis abundant (LEA) hydroxyproline-rich glycoprotein family	1.449
Gh_A01G0507	6.43	8.152	Late embryogenesis abundant (LEA) protein-related	6.668
Gh_A01G0508	1.682	1.762	Late embryogenesis abundant (LEA) protein-related	1.921
Gh_A01G0506	1.153	1.005	Late embryogenesis abundant (LEA) protein-related	1.525
Gh_D09G0821	4.492	4.035	Late embryogenesis abundant protein (LEA) family protein	4.846
Gh_D09G1020	1.424	1.634	late embryogenesis abundant protein-related / LEA protein-related	1.316
Gh_A09G1000	1.295	1.261	late embryogenesis abundant protein-related / LEA protein-related	1.434
Gh_D06G1770	1.364	1.233	Lateral organ boundaries (LOB) domain family protein	1.57
Gh_A03G0525	1.675	1.568	Leucine-rich receptor-like protein kinase family protein	1.64
Gh_D07G2245	2.243	2.001	like SEX4 1	2.752
Gh_A07G2025	1.322	1.251	like SEX4 1	1.985
Gh_A12G0843	2.629	1.194	Lipase/lipooxygenase, PLAT/LH2 family protein	1.736
Gh_D05G1378	1.059	1.808	LOB domain-containing protein 4	1.562
Gh_D08G1571	1.232	1.038	LRR and NB-ARC domains-containing disease resistance protein	1.331
Gh_D08G0876	2.835	3.081	Major facilitator superfamily protein	3.709
Gh_A08G0736	3.58	2.81	Major facilitator superfamily protein	4.009
Gh_D11G0470	1.826	2.469	Major facilitator superfamily protein	2.5
Gh_Sca007431G01	1.046	2.339	Major facilitator superfamily protein	1.537
Gh_D03G0601	1.554	2.005	Major facilitator superfamily protein	1.85
Gh_D08G0875	2.777	1.907	Major facilitator superfamily protein	3.074
Gh_D02G0947	1.144	1.723	Major facilitator superfamily protein	1.467
Gh_D13G2093	2.529	1.64	Major facilitator superfamily protein	2.755
Gh_D05G0241	1.078	1.604	Major facilitator superfamily protein	1.181
Gh_A05G0177	1.682	1.479	Major facilitator superfamily protein	1.974
Gh_A13G1745	1.387	1.141	Major facilitator superfamily protein	1.532
Gh_A10G1803	1.644	1.128	Major facilitator superfamily protein	1.431
Gh_A02G1640	1.308	1.11	Major facilitator superfamily protein	1.102
Gh_A12G0944	5.667	4.038	Major Facilitator Superfamily with SPX (SYG1/Pho81/XPR1) domain-containing protein	5.272
Gh_A01G1675	5.072	4.228	MATE efflux family protein	3.888
Gh_D01G2172	2.51	1.58	metallothionein 2A	2.283
Gh_A01G1913	1.586	1.033	metallothionein 2A	1.284
Gh_D04G1170	1.023	1.019	metallothionein 2A	1.603
Gh_D10G1775	2.717	2.837	Mitochondrial import inner membrane translocase subunit Tim17/Tim22/Tim23 family protein	4.308
Gh_A12G1802	1.087	1.809	mitochondrion-localized small heat shock protein 23.6	1.135
Gh_A01G0637	2.361	1.185	mitogen-activated protein kinase kinase kinase 15	2.016
Gh_A04G0891	8.257	3.234	MLP-like protein 423	8.707
Gh_A10G0537	1.437	1.381	multidrug resistance-associated protein 6	1.546
Gh_D05G2502	2.29	1.033	myb domain protein 73	2.649
Gh_Sca004734G04	1.532	3.707	MYB-like 102	2.056
Gh_A03G0075	1.785	1.157	myb-like transcription factor family protein	1.516
Gh_A06G1374	5.095	8.391	N/A	5.951
Gh_D06G1716	8.251	8.251	N/A	9.381
Gh_A10G1416	6.742	7.465	N/A	6.683
Gh_A03G0547	5.971	6.509	N/A	5.79
Gh_D09G1202	7.125	6.382	N/A	6.852
Gh_D02G1673	4.433	5.808	N/A	5.607
Gh_A06G1373	6.487	5.45	N/A	5.927
Gh_D06G1715	6.4	5.296	N/A	5.579
Gh_D03G0982	6.58	5.142	N/A	6.21
Gh_A09G0337	7.773	4.026	N/A	7.587
Gh_D09G0340	6.225	4.013	N/A	6.195
Gh_A03G1252	5.074	3.939	N/A	3.58
Gh_D02G0649	4.615	3.932	N/A	4.465
Gh_D02G1693	4.313	3.722	N/A	3.225
Gh_A11G2496	2.178	3.356	N/A	2.748
Gh_A07G0471	3.089	3.025	N/A	2.875
Gh_D11G1404	4.402	2.933	N/A	5.384
Gh_A03G1236	1.908	2.78	N/A	2.927
Gh_D11G2841	1.397	2.244	N/A	1.826
Gh_D07G0536	4.714	2.228	N/A	4.139
Gh_D03G1599	2.674	2.142	N/A	2.273
Gh_A02G0838	3.37	2.124	N/A	2.971
Gh_A05G2233	1.172	2.02	N/A	2.062
Gh_D12G0890	1.117	1.996	N/A	1.401
Gh_A07G1160	1.461	1.915	N/A	1.353
Gh_D05G1766	2.008	1.91	N/A	2.143
Gh_D10G1652	1.026	1.801	N/A	1.219
Gh_D02G0888	2.563	1.736	N/A	2.849
Gh_A05G1589	1.578	1.731	N/A	1.822
Gh_A03G1087	3.621	1.728	N/A	3.051
Gh_D06G1915	2.862	1.69	N/A	2.55
Gh_D10G0527	1.738	1.667	N/A	2.157
Gh_D02G0392	1.098	1.657	N/A	1.743
Gh_D08G1633	2.962	1.558	N/A	3.299
Gh_D07G0740	1.019	1.555	N/A	1.256
Gh_D07G2375	2.471	1.51	N/A	1.335
Gh_A02G0855	1.121	1.505	N/A	1.144
Gh_A08G0830	1.643	1.488	N/A	1.163
Gh_A10G0671	1.524	1.426	N/A	1.983
Gh_D04G1516	1.224	1.418	N/A	1.152
Gh_A11G0424	1.068	1.404	N/A	1.328
Gh_D11G3077	2.107	1.382	N/A	1.502
Gh_A12G1166	1.457	1.369	N/A	1.219
Gh_D02G2091	3.219	1.301	N/A	2.175
Gh_A04G1405	1.465	1.257	N/A	1.747
Gh_A11G2914	2.527	1.153	N/A	1.92
Gh_D08G2434	1.853	1.226	NAC domain containing protein 70	1.565
Gh_D07G1502	2.006	1.919	NAC domain containing protein 74	1.952
Gh_D10G0059	2.73	2.396	NAD(P)-binding Rossmann-fold superfamily protein	2.608
Gh_A07G1121	1.511	1.318	NAD(P)-binding Rossmann-fold superfamily protein	1.886
Gh_A01G0315	1.576	1.307	NB-ARC domain-containing disease resistance protein	2.024
Gh_A01G0280	4.609	3.472	nine-cis-epoxycarotenoid dioxygenase 3	4.403
Gh_A13G1311	5.883	3.085	nine-cis-epoxycarotenoid dioxygenase 3	5.949
Gh_D13G1614	4.576	2.07	nine-cis-epoxycarotenoid dioxygenase 3	4.243
Gh_D06G1506	1.777	2.83	nine-cis-epoxycarotenoid dioxygenase 5	2.279
Gh_A06G2014	1.378	2.621	nine-cis-epoxycarotenoid dioxygenase 5	1.812
Gh_D01G0291	4.52	3.133	nine-cis-epoxycarotenoid dioxygenase 9	4.252
Gh_A12G2001	2.446	2.868	nitrate transporter 1.1	2.607
Gh_A13G0448	1.61	2.143	nitrate transporter 1:2	1.56
Gh_A07G1970	1.537	2.015	nonsense-mediated mRNA decay NMD3 family protein	1.588
Gh_D11G2928	2.436	1.381	nuclear factor Y, subunit C2	1.759
Gh_D09G1142	1.039	1.379	Nucleotide-sugar transporter family protein	1.231
Gh_D02G2018	1.841	1.64	Octicosapeptide/Phox/Bem1p family protein	1.62
Gh_A05G3256	1.609	1.903	O-Glycosyl hydrolases family 17 protein	2.223
Gh_A13G1509	1.459	1.611	O-Glycosyl hydrolases family 17 protein	1.103
Gh_D07G0443	6.096	5.968	oleosin 1	5.74
Gh_A10G0920	4.001	4.806	Oleosin family protein	5.845
Gh_D09G0284	2.549	2.646	Oleosin family protein	2.536
Gh_D10G0837	1.853	1.437	Oleosin family protein	2.156
Gh_A09G0669	1.089	1.703	Oligosaccharyltransferase complex/magnesium transporter family protein	1.277
Gh_A12G2188	6.459	2.97	O-methyltransferase 1	4.129
Gh_A10G2271	1.615	2.438	O-methyltransferase family protein	2.977
Gh_D12G2368	5.417	2.176	O-methyltransferase family protein	5.383
Gh_D04G1663	1.639	1.094	O-methyltransferase family protein	1.157
Gh_D05G1586	5.952	4.299	PEBP (phosphatidylethanolamine-binding protein) family protein	6.496
Gh_D12G1856	2.089	2.806	Pectate lyase family protein	3.095
Gh_A12G2658	1.586	2.737	Pectate lyase family protein	2.466
Gh_D02G1579	1.263	2.156	Pectate lyase family protein	2.292
Gh_A04G0823	3.131	2.356	Pectin lyase-like superfamily protein	2.754
Gh_A09G2413	1.864	2.273	Pectin lyase-like superfamily protein	2.245
Gh_A13G0030	2.784	2.228	Pectin lyase-like superfamily protein	2.608
Gh_D09G1601	1.669	2.19	Pectin lyase-like superfamily protein	1.908
Gh_A10G1706	1.986	2.109	Pectin lyase-like superfamily protein	2.106
Gh_A10G1705	1.878	1.917	Pectin lyase-like superfamily protein	2.166
Gh_D13G0046	1.608	1.713	Pectin lyase-like superfamily protein	1.504
Gh_D10G1975	1.981	1.694	Pectin lyase-like superfamily protein	2.092
Gh_A13G0023	2.105	1.375	Pectin lyase-like superfamily protein	2.561
Gh_D10G1974	1.325	1.367	Pectin lyase-like superfamily protein	1.876
Gh_D04G1322	3.023	1.267	Pectin lyase-like superfamily protein	3.521
Gh_A05G3328	1.313	1.194	Pectin lyase-like superfamily protein	1.391
Gh_D07G1162	3.292	3.159	pectinesterase 11	3.534
Gh_D02G2149	1.904	1.374	pectinesterase 11	2.214
Gh_A11G0079	1.318	1.178	Per1-like family protein	1.001
Gh_A10G1627	2.077	3.958	Peroxidase superfamily protein	2.007
Gh_D09G0590	2.526	2.824	Peroxidase superfamily protein	2.852
Gh_D10G1882	1.02	2.218	Peroxidase superfamily protein	1.532
Gh_A09G1602	2.741	2.914	pfkB-like carbohydrate kinase family protein	2.732
Gh_D09G1700	1.494	1.611	pfkB-like carbohydrate kinase family protein	1.368
Gh_A07G0953	1.898	1.378	Pheophorbide a oxygenase family protein with Rieske [2Fe-2S] domain	2.06
Gh_D03G0764	1.207	1.203	phosphoinositide 4-kinase gamma 4	1.528
Gh_A07G1541	1.4	2.699	Phosphotyrosine protein phosphatases superfamily protein	1.984
Gh_D01G1508	1.341	1.276	photosystem I light harvesting complex gene 2	2.206
Gh_A11G1245	4.581	4.614	photosystem I subunit E-2	6.318
Gh_A02G0165	1.71	2.863	PHYTOCYSTATIN 2	3.24
Gh_A03G0501	1.08	1.503	Plant invertase/pectin methylesterase inhibitor superfamily protein	1.026
Gh_D01G1218	2.301	2.571	Plant protein of unknown function (DUF828)	2.148
Gh_A01G1131	2.163	2.268	Plant protein of unknown function (DUF828)	2.05
Gh_D10G0861	1.303	1.008	plasma membrane intrinsic protein 3	1.685
Gh_A12G1482	1.94	2.134	plasmodesmata callose-binding protein 3	2.151
Gh_D12G1609	1.571	1.836	plasmodesmata callose-binding protein 3	1.537
Gh_D07G2076	3.098	3.198	plasmodesmata-located protein 1	3.696
Gh_A03G0037	1.427	1.508	pleckstrin homology (PH) domain-containing protein	1.527
Gh_D03G1614	1.738	1.141	pleckstrin homology (PH) domain-containing protein	1.91
Gh_A11G0942	1.982	1.862	pleiotropic drug resistance 9	1.969
Gh_D11G1087	2.026	1.249	pleiotropic drug resistance 9	1.925
Gh_D03G0699	2.876	2.957	P-loop containing nucleoside triphosphate hydrolases superfamily protein	3.269
Gh_A02G1031	2.206	2.382	P-loop containing nucleoside triphosphate hydrolases superfamily protein	2.736
Gh_A07G1950	1.131	1.411	P-loop containing nucleoside triphosphate hydrolases superfamily protein	1.48
Gh_D07G2167	1.389	1.371	P-loop containing nucleoside triphosphate hydrolases superfamily protein	1.717
Gh_A03G0260	1.107	1.355	P-loop containing nucleoside triphosphate hydrolases superfamily protein	1.322
Gh_D10G1650	1.02	1.009	P-loop containing nucleoside triphosphate hydrolases superfamily protein	1.052
Gh_A11G1474	2.496	3.022	Pollen Ole e 1 allergen and extensin family protein	2.986
Gh_A12G0841	1.868	1.691	Pollen Ole e 1 allergen and extensin family protein	1.933
Gh_D12G0918	1.842	1.539	Pollen Ole e 1 allergen and extensin family protein	1.924
Gh_A08G2351	1.037	1.571	prenylated RAB acceptor 1.B1	1.068
Gh_A09G0332	2.645	1.549	prohibitin 4	2.382
Gh_D09G0335	1.785	1.194	prohibitin 4	1.253
Gh_A10G2054	2.434	2.114	proline transporter 2	2.543
Gh_A01G0875	3.157	1.611	Prolyl oligopeptidase family protein	1.681
Gh_D10G2204	1.963	1.572	protein kinase family protein	1.095
Gh_A05G3126	1.746	2.522	Protein kinase superfamily protein	1.755
Gh_A06G1294	1.006	1.625	Protein kinase superfamily protein	1.425
Gh_A07G0297	1.313	1.069	Protein kinase superfamily protein	1.089
Gh_D07G0940	1.825	3.3	Protein of unknown function (DUF1635)	3.448
Gh_A04G0105	2.799	3.646	Protein of unknown function (DUF3537)	3.059
Gh_D10G2251	1.031	1.151	Protein of unknown function (DUF506)	1.431
Gh_D12G1497	1.677	1.835	Protein of unknown function (DUF579)	2.032
Gh_D09G1880	1.703	1.788	Protein of unknown function (DUF581)	1.991
Gh_A09G0794	1.392	1.748	Protein of unknown function (DUF581)	1.942
Gh_D03G0406	2.027	1.507	Protein of unknown function (DUF581)	1.533
Gh_D11G1291	2.848	1.069	Protein of unknown function (DUF581)	2.48
Gh_D10G2303	4.427	5.034	Protein of unknown function (DUF604)	4.561
Gh_A10G1995	2.449	2.362	Protein of unknown function (DUF604)	2.242
Gh_A12G0967	1.961	2.168	Protein of unknown function (DUF604)	1.975
Gh_D11G0962	1.665	2.003	Protein of unknown function (DUF604)	1.48
Gh_A12G1231	1.67	1.218	Protein of unknown function (DUF604)	1.263
Gh_D11G1482	1.108	1.323	Protein of unknown function (DUF707)	1.725
Gh_A11G1330	1.266	1.299	Protein of unknown function (DUF707)	1.563
Gh_D01G0526	1.267	1.054	Protein of unknown function (DUF761)	1.687
Gh_D03G0321	2.214	1.626	Protein of unknown function (duplicated DUF1399)	1.226
Gh_A08G2087	2.021	2.062	Protein of unknown function, DUF593	1.918
Gh_A10G0685	4.771	4.725	Protein of unknown function, DUF642	4.816
Gh_A12G2380	3.016	3.141	Protein phosphatase 2C family protein	3.22
Gh_D12G2508	1.946	1.919	Protein phosphatase 2C family protein	2.306
Gh_A07G0123	1.688	1.262	Protein phosphatase 2C family protein	1.851
Gh_D07G2383	1.138	1.066	Protein phosphatase 2C family protein	1.252
Gh_D04G0015	8.674	8.035	protein phosphatase 2CA	9.044
Gh_A05G3589	4.791	5.309	protein phosphatase 2CA	5.309
Gh_A10G1998	1.589	1.006	protein phosphatase 2CA	1.764
Gh_A06G1838	3.773	3.429	purple acid phosphatase 10	4.845
Gh_A05G1622	2.064	2.272	purple acid phosphatase 12	2.441
Gh_D11G0018	3.234	2.021	purple acid phosphatase 17	4.418
Gh_A09G1277	1.578	1.139	Putative lysine decarboxylase family protein	1.775
Gh_A12G1332	2.477	2.302	Pyruvate phosphate dikinase, PEP/pyruvate binding domain	2.759
Gh_D12G1458	1.426	1.32	Pyruvate phosphate dikinase, PEP/pyruvate binding domain	1.757
Gh_D11G1091	2.946	2.237	RAD-like 6	2.947
Gh_A05G3108	1.276	1.727	Raffinose synthase family protein	1.425
Gh_A11G1608	1.679	2.953	receptor serine/threonine kinase, putative	2.059
Gh_D11G1767	1.468	2.35	receptor serine/threonine kinase, putative	1.88
Gh_A05G3860	1.037	1.066	Regulator of Vps4 activity in the MVB pathway protein	1.27
Gh_A11G1138	5.291	2.747	responsive to abscisic acid 28	5.494
Gh_D11G1628	2.012	2.33	reversibly glycosylated polypeptide 1	2.115
Gh_A08G2486	1.281	1.717	RHD SIX-LIKE 1	1.803
Gh_D08G0565	1.046	1.494	RHD SIX-LIKE 1	1.43
Gh_D07G2426	1.837	1.134	RHD SIX-LIKE 1	1.774
Gh_D12G1637	6.028	3.694	ribonuclease 1	6.332
Gh_A12G1513	4.074	2.795	ribonuclease 1	4.184
Gh_D04G1033	3.869	2.86	RING/U-box superfamily protein	3.721
Gh_D05G3913	1.179	1.736	RING/U-box superfamily protein	1.958
Gh_A05G0707	1.834	1.634	RING/U-box superfamily protein	2.272
Gh_A13G0247	2.041	1.188	RNA-dependent RNA polymerase 1	1.555
Gh_A11G1708	3.098	4.466	roline-rich extensin-like receptor kinase 4	3.427
Gh_D11G2295	1.87	1.622	root cap 1 (RCP1)	2.074
Gh_D11G2682	1.17	1.056	ROP binding protein kinases 2	1.221
Gh_D07G0138	1.921	2.564	SAUR-like auxin-responsive protein family	2.644
Gh_D01G0949	1.635	1.865	SAUR-like auxin-responsive protein family	2.232
Gh_A01G1088	2.922	2.251	seed imbibition 2	2.248
Gh_D08G0465	2.152	2.367	senescence-associated gene 21	1.699
Gh_A13G0520	1.393	1.526	serine carboxypeptidase-like 34	1.884
Gh_D13G0610	1.034	1.413	serine carboxypeptidase-like 34	1.126
Gh_D12G0861	1.28	1.549	SKU5 similar 16	1.214
Gh_A12G0639	1.66	1.5	SKU5 similar 16	1.079
Gh_A10G0836	1.402	1.309	SKU5 similar 17	1.272
Gh_A07G0162	1.086	1.083	somatic embryogenesis receptor-like kinase 1	1.318
Gh_D07G0265	2.875	2.617	SOS3-interacting protein 3	1.729
Gh_D02G1254	6.586	6.591	sphingoid base hydroxylase 2	6.762
Gh_A03G0871	9.264	6.021	sphingoid base hydroxylase 2	10.831
Gh_A01G1778	2.733	1.905	starch branching enzyme 2.2	2.819
Gh_D04G0999	1.729	1.33	starch branching enzyme 2.2	2.667
Gh_D01G2020	1.203	1.22	starch branching enzyme 2.2	1.216
Gh_A05G0956	1.639	1.821	STELAR K+ outward rectifier	1.596
Gh_A04G0125	1.958	1.539	Stigma-specific Stig1 family protein	1.848
Gh_A01G0641	1.683	1.297	Stigma-specific Stig1 family protein	1.635
Gh_A04G0275	2.408	1.132	Stigma-specific Stig1 family protein	2.339
Gh_D01G0659	1.336	1.033	Stigma-specific Stig1 family protein	1.365
Gh_A08G1591	1.255	1.159	Subtilase family protein	1.811
Gh_D06G1057	2.169	1.173	sucrose phosphate synthase 1F	2.602
Gh_A06G0716	2.113	1.202	sucrose synthase 4	2.867
Gh_D10G0693	1.46	1.151	sulfate transmembrane transporters	1.343
Gh_A12G2051	1.667	1.232	TCP family transcription factor	1.041
Gh_A07G0202	5.733	2.514	temperature-induced lipocalin	6.775
Gh_A10G0048	1.94	1.379	terpene synthase 21	3.03
Gh_D05G0811	1.069	1.05	terpene synthase 21	1.422
Gh_A09G0986	1.286	1.146	tetraspanin3	1.321
Gh_A06G1031	3.442	4.827	Tetratricopeptide repeat (TPR)-like superfamily protein	3.669
Gh_A07G1868	2.555	4.386	Tetratricopeptide repeat (TPR)-like superfamily protein	3.776
Gh_D06G1980	2.48	2.193	Tetratricopeptide repeat (TPR)-like superfamily protein	2.498
Gh_A06G1610	2.252	2.126	Tetratricopeptide repeat (TPR)-like superfamily protein	2.294
Gh_D08G1699	2.599	2.068	Tetratricopeptide repeat (TPR)-like superfamily protein	2.625
Gh_A08G1404	1.647	1.396	Tetratricopeptide repeat (TPR)-like superfamily protein	1.955
Gh_D13G1781	1.441	1.256	Tetratricopeptide repeat (TPR)-like superfamily protein	1.37
Gh_A12G1009	2.171	1.146	Tetratricopeptide repeat (TPR)-like superfamily protein	2.077
Gh_A13G1427	1.118	1.132	Tetratricopeptide repeat (TPR)-like superfamily protein	1.179
Gh_D04G1030	1.46	1.087	Tetratricopeptide repeat (TPR)-like superfamily protein	1.538
Gh_D01G0592	1.484	1.559	thiazole biosynthetic enzyme, chloroplast (ARA6) (THI1) (THI4)	1.46
Gh_A05G0320	1.248	1.699	Thioredoxin superfamily protein	1.162
Gh_D06G1695	1.272	2	tonoplast dicarboxylate transporter	1.471
Gh_A06G1962	1.846	1.585	tonoplast dicarboxylate transporter	2.531
Gh_D07G0458	2.611	1.987	Transducin family protein / WD-40 repeat family protein	2.208
Gh_D04G1713	5.016	6.997	Transducin/WD40 repeat-like superfamily protein	6.846
Gh_D06G0094	6.776	5.097	Transducin/WD40 repeat-like superfamily protein	8.014
Gh_A04G1105	2.329	3.598	Transducin/WD40 repeat-like superfamily protein	3.55
Gh_A03G1898	3.517	3.12	Transducin/WD40 repeat-like superfamily protein	4.6
Gh_D03G0969	1.739	1.722	Transducin/WD40 repeat-like superfamily protein	1.063
Gh_D03G0016	1.625	1.52	Transducin/WD40 repeat-like superfamily protein	1.825
Gh_A10G0748	2.352	1.48	Transducin/WD40 repeat-like superfamily protein	2.489
Gh_A02G1703	1.352	1.018	Transducin/WD40 repeat-like superfamily protein	1.352
Gh_D07G1802	1.622	2.121	Transmembrane amino acid transporter family protein	1.394
Gh_D09G1548	1.291	1.512	Transmembrane amino acid transporter family protein	1.564
Gh_A07G1599	1.353	1.365	Transmembrane amino acid transporter family protein	1.28
Gh_A08G1399	1.71	1.211	trehalose phosphatase/synthase 5	1.254
Gh_D08G1695	1.765	1.112	trehalose phosphatase/synthase 5	1.7
Gh_D06G1745	1.292	1.889	TRICHOME BIREFRINGENCE-LIKE 38	1.779
Gh_D09G0239	1.361	1.425	TRICHOME BIREFRINGENCE-LIKE 43	1.479
Gh_D03G1454	1.332	2.274	tubulin beta 8	1.776
Gh_D03G1455	1.687	2.093	tubulin beta 8	1.609
Gh_A03G0127	1.314	2.006	tubulin beta 8	1.596
Gh_A03G0126	1.571	1.819	tubulin beta 8	1.465
Gh_A03G0478	2.68	1.148	TUDOR-SN protein 1	1.909
Gh_A08G0223	2.806	2.284	ubiquitin-conjugating enzyme 30	2.311
Gh_D01G0740	1.036	1.308	ubiquitin-protein ligase 2	1.178
Gh_A05G3413	3.819	1.527	UDP-D-glucose/UDP-D-galactose 4-epimerase 2	2.63
Gh_D02G0227	5.051	2.15	UDP-glucosyl transferase 75B2	3.223
Gh_D03G0695	1.506	3.187	UDP-glucosyl transferase 88A1	1.71
Gh_D08G1167	3.07	2.551	UDP-Glycosyltransferase superfamily protein	4.543
Gh_A08G0957	1.604	2.423	UDP-Glycosyltransferase superfamily protein	1.938
Gh_D09G1782	1.232	1.169	UDP-Glycosyltransferase superfamily protein	1.61
Gh_A03G0383	1.756	1.102	UDP-Glycosyltransferase superfamily protein	1.972
Gh_D03G1158	2.149	1.063	UDP-Glycosyltransferase superfamily protein	1.802
Gh_D11G2194	1.212	1.056	VQ motif-containing protein	1.297
Gh_A06G1471	3.441	2.28	XH/XS domain-containing protein	4.262
Gh_D06G1805	2.46	2.277	XH/XS domain-containing protein	3.411
Gh_A03G0438	3.965	3.444	YELLOW STRIPE like 3	3.699
Gh_D03G1106	3.026	2.827	YELLOW STRIPE like 3	2.725
Gh_A09G1671	2.876	2.459	YELLOW STRIPE like 3	2.628
Gh_D09G1766	1.522	1.121	YELLOW STRIPE like 3	1.317
Gh_D09G0320	3.291	2.518	zinc finger (C3HC4-type RING finger) family protein	3.606
Gh_A09G0320	2.591	2.044	zinc finger (C3HC4-type RING finger) family protein	3.483
Gh_A13G1728	2.086	3.075	Zinc finger C-x8-C-x5-C-x3-H type family protein	2.837
Gh_D05G0432	1.022	2.027	zinc transporter 4 precursor	1.207
Gh_D05G0913	4.518	3.695	ZRT/IRT-like protein 2	3.796
Gh_A05G0795	2.505	1.657	ZRT/IRT-like protein 2	1.77
Gh_A13G2341	9.452	3.484	2-oxoglutarate (2OG) and Fe(II)-dependent oxygenase superfamily protein	NS
Gh_A09G2180	1.055	1.027	AMP-dependent synthetase and ligase family protein	NS
Gh_D13G0900	1.65	1.217	Armadillo/beta-catenin-like repeat family protein	NS
Gh_D12G2438	1.091	1.3	beta-carotene hydroxylase 2	NS
Gh_A11G1127	1.439	1.059	copper ion binding;electron carriers	NS
Gh_D01G1909	1.83	1.006	cytochrome P450, family 712, subfamily A, polypeptide 1	NS
Gh_A02G1588	1.949	1.337	DNA glycosylase superfamily protein	NS
Gh_D10G0582	2.995	2.105	DOF zinc finger protein 2	NS
Gh_A10G2162	1.092	1.015	E3 ubiquitin ligase, putative	NS
Gh_A06G1389	1.253	1.161	Fatty acid hydroxylase superfamily	NS
Gh_A08G0657	1.414	1.997	Flavin-containing monooxygenase family protein	NS
Gh_D08G0907	1.601	1.357	Galactosyltransferase family protein	NS
Gh_A12G1168	1.082	1.253	galacturonosyltransferase-like 7	NS
Gh_D13G1617	3.683	1.72	glutathione S-transferase TAU 19	NS
Gh_D10G1343	1.811	1.741	glycerol-3-phosphate acyltransferase 6	NS
Gh_D01G0024	1.047	1.081	HEAT repeat ;HECT-domain (ubiquitin-transferase)	NS
Gh_A08G2388	1.152	1.285	heavy metal atpase 5	NS
Gh_A13G1131	1.522	1.315	Histone superfamily protein	NS
Gh_D10G0496	1.184	1.051	Histone superfamily protein	NS
Gh_A08G1895	2.766	2.828	Homeodomain-like superfamily protein	NS
Gh_D13G1075	1.413	1.079	hydroxyproline-rich glycoprotein family protein	NS
Gh_D05G1364	1.355	1.213	Leucine-rich repeat transmembrane protein kinase	NS
Gh_A02G1481	1.282	1.166	Leucine-rich repeat transmembrane protein kinase	NS
Gh_D11G0345	1.123	1.489	malate dehydrogenase	NS
Gh_A04G0372	1.019	1.361	mechanosensitive channel of small conductance-like 6	NS
Gh_A04G0373	1.152	1.11	mechanosensitive channel of small conductance-like 6	NS
Gh_D09G1693	2.924	3.08	Microtubule associated protein (MAP65/ASE1) family protein	NS
Gh_A13G2154	2.847	2.058	myb domain protein 106	NS
Gh_D08G0613	1.369	2.075	N/A	NS
Gh_A05G1643	1.44	2.001	N/A	NS
Gh_D12G0524	1.386	1.568	N/A	NS
Gh_A09G2252	1.255	1.064	N/A	NS
Gh_A12G0588	1.336	1.04	N/A	NS
Gh_A04G0836	1.202	1.839	nitrate transporter 1.7	NS
Gh_A09G1137	1.026	1.481	Nucleotide-sugar transporter family protein	NS
Gh_D05G0159	2.305	1.328	Nucleotide-sugar transporter family protein	NS
Gh_A03G1567	1.154	1.007	Octicosapeptide/Phox/Bem1p family protein	NS
Gh_D06G1724	1.144	1.201	oligopeptide transporter	NS
Gh_D12G1231	1.206	2.025	Pectin lyase-like superfamily protein	NS
Gh_A07G2033	1.036	1.904	Pectin lyase-like superfamily protein	NS
Gh_A03G0529	1.205	1.306	peptide met sulfoxide reductase 4	NS
Gh_D03G1000	1.274	1.163	peptide met sulfoxide reductase 4	NS
Gh_A12G2370	2.296	3.529	Peroxidase superfamily protein	NS
Gh_D12G2504	2.006	3.063	Peroxidase superfamily protein	NS
Gh_A11G2494	1.279	1.098	phytochrome interacting factor 3	NS
Gh_A01G1234	1.069	1.285	PLANT CADMIUM RESISTANCE 2	NS
Gh_A02G1514	1.598	1.274	PLANT CADMIUM RESISTANCE 2	NS
Gh_D08G2364	2.507	2.132	Protein of unknown function (DUF1218)	NS
Gh_D04G1823	1.512	1.165	Protein of unknown function (DUF579)	NS
Gh_D12G1356	2.254	1.364	Protein of unknown function (DUF604)	NS
Gh_A02G1402	1.501	1.22	Protein of unknown function (duplicated DUF1399)	NS
Gh_D04G0974	1.659	1.738	purple acid phosphatase 22	NS
Gh_D07G0782	1.062	1.332	reversibly glycosylated polypeptide 1	NS
Gh_D07G0243	3.686	2.388	S-adenosyl-L-methionine-dependent methyltransferases superfamily protein	NS
Gh_A08G1138	1.237	1.282	S-adenosyl-L-methionine-dependent methyltransferases superfamily protein	NS
Gh_D11G1913	1.22	1.254	SKU5 similar 16	NS
Gh_A13G1377	1.043	1.998	TatD related DNase	NS
Gh_Sca116966G01	5.769	6.402	TUDOR-SN protein 1	NS
Gh_D05G2525	1.015	1.062	ubiquitin-protein ligase 1	NS
Gh_A05G3765	1.163	1.533	Zinc finger (C3HC4-type RING finger) family protein	NS
Gh_A01G0705	1.711	1.971	zinc transporter 11 precursor	NS
Gh_D01G0723	1.193	1.411	zinc transporter 11 precursor	NS
Gh_D08G1262	-1.551	-1.304	1-aminocyclopropane-1-carboxylic acid (acc) synthase 6	-1.306
Gh_D03G0678	-1.825	-1.557	1-aminocyclopropane-1-carboxylic acid (acc) synthase 6	-1.915
Gh_D11G0221	-3.121	-3.873	1-aminocyclopropane-1-carboxylic acid (acc) synthase 6	-2.991
Gh_A11G0207	-2.821	-4.139	1-aminocyclopropane-1-carboxylic acid (acc) synthase 6	-3.59
Gh_A09G1555	-1.251	-1.888	1-deoxy-D-xylulose 5-phosphate reductoisomerase	-1.81
Gh_D09G1627	-1.348	-2.007	1-deoxy-D-xylulose 5-phosphate reductoisomerase	-1.875
Gh_A08G1512	-1.397	-1.318	2-oxoglutarate (2OG) and Fe(II)-dependent oxygenase superfamily protein	-1.552
Gh_A10G0821	-1.143	-1.52	2-oxoglutarate (2OG) and Fe(II)-dependent oxygenase superfamily protein	-1.105
Gh_D04G1181	-2.158	-1.813	2-oxoglutarate (2OG) and Fe(II)-dependent oxygenase superfamily protein	-1.256
Gh_D07G1858	-1.215	-2.033	2-oxoglutarate (2OG) and Fe(II)-dependent oxygenase superfamily protein	-1.019
Gh_A09G1294	-1.24	-1.511	A20/AN1-like zinc finger family protein	-1.035
Gh_A02G1140	-1.53	-1.76	ABC-2 and Plant PDR ABC-type transporter family protein	-2.751
Gh_Sca006272G01	-1.596	-2.955	ABC-2 and Plant PDR ABC-type transporter family protein	-2.662
Gh_A11G1961	-1.904	-2.36	Acetamidase/Formamidase family protein	-2.13
Gh_D11G2050	-2.036	-1.841	ACT domain repeat 1	-2.304
Gh_D05G2283	-3.541	-4.815	ACT domain repeat 3	-1.289
Gh_Sca004880G01	-1.355	-1.826	ACT domain repeat 4	-1.697
Gh_D09G0383	-1.291	-1.747	ACT domain repeat 6	-1.733
Gh_A09G1738	-1.384	-1.177	ACT domain repeat 8	-1.609
Gh_D13G0205	-1.092	-1.105	ACT domain-containing protein	-1.396
Gh_A01G0015	-4.399	-7.023	ACT-like protein tyrosine kinase family protein	-2.759
Gh_D03G0030	-1.569	-3.476	acyl activating enzyme 1	-2.481
Gh_A03G0228	-1.799	-3.029	Acyl-CoA N-acyltransferases (NAT) superfamily protein	-2.663
Gh_A04G0604	-1.366	-1.38	acylphosphatase family	-1.507
Gh_A03G0386	-1.091	-1.449	Adenine nucleotide alpha hydrolases-like superfamily protein	-1.521
Gh_D11G1128	-2.374	-2.127	ADP-ribosylation factor A1B	-1.81
Gh_A05G0586	-4.076	-6.357	alanine:glyoxylate aminotransferase	-5.314
Gh_D10G2582	-1.264	-1.127	alanine:glyoxylate aminotransferase 2	-1.05
Gh_A10G0770	-1.729	-1.687	alanine:glyoxylate aminotransferase 2	-2.034
Gh_A09G2108	-2.119	-2.28	alanine-tRNA ligases;nucleic acid binding;ligases, forming aminoacyl-tRNA and related compounds;nucleotide binding;ATP binding	-1.719
Gh_D09G2314	-2.617	-2.902	alanine-tRNA ligases;nucleic acid binding;ligases, forming aminoacyl-tRNA and related compounds;nucleotide binding;ATP binding	-2.233
Gh_D05G0773	-1.593	-2.324	aldehyde oxidase 2	-1.541
Gh_D12G0456	-1.351	-1.308	allantoate amidohydrolase	-1.248
Gh_D08G0664	-1.086	-1.15	alpha/beta-Hydrolases superfamily protein	-1.363
Gh_D02G0920	-1.504	-1.232	alpha/beta-Hydrolases superfamily protein	-2.16
Gh_A05G1734	-1.039	-1.356	alpha/beta-Hydrolases superfamily protein	-1.143
Gh_A01G1315	-1.49	-1.386	alpha/beta-Hydrolases superfamily protein	-1.073
Gh_D09G2069	-1.181	-1.712	alpha/beta-Hydrolases superfamily protein	-1.703
Gh_A13G1897	-1.165	-1.754	alpha/beta-Hydrolases superfamily protein	-1.543
Gh_D05G2496	-1.223	-1.82	alpha/beta-Hydrolases superfamily protein	-1.901
Gh_A08G1889	-1.509	-2.313	alpha/beta-Hydrolases superfamily protein	-1.334
Gh_D09G1264	-2.186	-2.147	Aluminium activated malate transporter family protein	-1.633
Gh_A10G0245	-2.041	-2.212	Aluminium induced protein with YGL and LRDR motifs	-2.746
Gh_D09G0700	-2.088	-2.318	Aluminium induced protein with YGL and LRDR motifs	-1.975
Gh_A09G0689	-1.962	-2.787	Aluminium induced protein with YGL and LRDR motifs	-2.286
Gh_D10G0217	-3.984	-5.466	Aluminium induced protein with YGL and LRDR motifs	-3.811
Gh_A10G0238	-4.545	-5.967	Aluminium induced protein with YGL and LRDR motifs	-4.203
Gh_A11G1119	-1.456	-1.645	aluminum-activated, malate transporter 12	-1.303
Gh_D11G2710	-1.887	-5.778	amidase 1	-2.007
Gh_D05G1310	-2.971	-5.678	aminopeptidase M1	-2.976
Gh_D04G1298	-1.38	-2.048	ammonium transporter 2	-2.913
Gh_D01G2240	-1.795	-2.737	ammonium transporter 2	-3.834
Gh_D05G1634	-1.558	-1.368	ankyrin repeat family protein	-1.328
Gh_A05G1460	-1.607	-1.482	ankyrin repeat family protein	-1.628
Gh_D08G2603	-2.257	-1.798	Ankyrin repeat family protein	-1.867
Gh_D10G2202	-2.069	-1.829	Ankyrin repeat family protein	-1.703
Gh_A08G2236	-2.401	-2.675	Ankyrin repeat family protein	-3.122
Gh_A08G2235	-2.506	-3.002	Ankyrin repeat family protein	-2.923
Gh_A11G0857	-2.163	-1.269	arabinogalactan protein 20	-2.793
Gh_A02G0044	-1.079	-1.059	ARM repeat superfamily protein	-1.319
Gh_A12G0548	-1.868	-1.46	armadillo repeat only 2	-1.932
Gh_D08G1646	-1	-1.214	ATP-binding cassette 14	-1.098
Gh_A12G1836	-1.278	-1.261	ATP-binding cassette 14	-1.614
Gh_D12G1760	-1.655	-1.553	atypical CYS HIS rich thioredoxin 5	-1.524
Gh_Sca006915G01	-2.748	-2.478	atypical CYS HIS rich thioredoxin 5	-2.57
Gh_A11G3061	-2.073	-3.012	Auxin-responsive GH3 family protein	-2.181
Gh_D11G2945	-3.14	-3.416	Auxin-responsive GH3 family protein	-6.829
Gh_D02G2286	-8.853	-10.182	basic chitinase	-7.051
Gh_D12G2506	-1.164	-1.104	basic helix-loop-helix (bHLH) DNA-binding superfamily protein	-1.325
Gh_D05G1958	-2.104	-1.512	basic helix-loop-helix (bHLH) DNA-binding superfamily protein	-1.814
Gh_A02G1414	-1.576	-1.656	basic helix-loop-helix (bHLH) DNA-binding superfamily protein	-2.52
Gh_A10G0730	-1.051	-1.711	basic helix-loop-helix (bHLH) DNA-binding superfamily protein	-1.209
Gh_A11G0710	-2.306	-2.409	basic helix-loop-helix (bHLH) DNA-binding superfamily protein	-2.53
Gh_D03G0119	-1.659	-2.29	basic helix-loop-helix (bHLH) DNA-binding superfamily protein	-1.452
Gh_D12G0591	-1.978	-2.397	basic helix-loop-helix (bHLH) DNA-binding superfamily protein	-2.593
Gh_A12G0577	-2.504	-2.864	basic helix-loop-helix (bHLH) DNA-binding superfamily protein	-2.19
Gh_A11G1675	-1.789	-2.255	basic leucine-zipper 2	-2.513
Gh_D13G0320	-2.897	-4.391	basic leucine-zipper 44	-4.519
Gh_A11G3073	-1.331	-1.509	basic region/leucine zipper motif 53	-1.332
Gh_A07G1171	-1.282	-1.545	basic region/leucine zipper motif 53	-1.399
Gh_D07G1271	-1.395	-1.772	basic region/leucine zipper motif 53	-1.413
Gh_D08G1413	-1.357	-1.305	BCL-2-associated athanogene 6	-2.718
Gh_D06G0726	-2.087	-1.168	beta galactosidase 1	-2.261
Gh_D11G3071	-2.256	-2.18	beta glucosidase 42	-2.447
Gh_D02G1986	-2.48	-1.659	beta-D-xylosidase 4	-2.916
Gh_A03G1516	-2.776	-1.883	beta-D-xylosidase 4	-3.678
Gh_A12G1850	-2.028	-2.02	beta-galactosidase 7	-2.147
Gh_A09G2067	-2.701	-1.383	beta-xylosidase 1	-1.541
Gh_D09G2276	-2.776	-2.906	beta-xylosidase 1	-2.571
Gh_D11G0254	-1.863	-1.067	Bifunctional inhibitor/lipid-transfer protein/seed storage 2S albumin superfamily protein	-2.896
Gh_D11G1588	-1.335	-1.109	Bifunctional inhibitor/lipid-transfer protein/seed storage 2S albumin superfamily protein	-1.346
Gh_D08G0973	-2.147	-1.147	Bifunctional inhibitor/lipid-transfer protein/seed storage 2S albumin superfamily protein	-2.022
Gh_A11G0237	-1.076	-1.202	Bifunctional inhibitor/lipid-transfer protein/seed storage 2S albumin superfamily protein	-3.01
Gh_D11G0252	-1.453	-1.3	Bifunctional inhibitor/lipid-transfer protein/seed storage 2S albumin superfamily protein	-3.456
Gh_D13G1963	-3.005	-1.368	Bifunctional inhibitor/lipid-transfer protein/seed storage 2S albumin superfamily protein	-2.607
Gh_A11G0239	-2.555	-1.626	Bifunctional inhibitor/lipid-transfer protein/seed storage 2S albumin superfamily protein	-3.247
Gh_A13G0035	-2.032	-1.687	Bifunctional inhibitor/lipid-transfer protein/seed storage 2S albumin superfamily protein	-2.384
Gh_D04G0626	-1.304	-2.333	Bifunctional inhibitor/lipid-transfer protein/seed storage 2S albumin superfamily protein	-1.842
Gh_D08G1843	-2.154	-2.366	Bifunctional inhibitor/lipid-transfer protein/seed storage 2S albumin superfamily protein	-3.074
Gh_A05G0073	-4.826	-3.545	Bifunctional inhibitor/lipid-transfer protein/seed storage 2S albumin superfamily protein	-3.677
Gh_D05G0131	-5.72	-3.761	Bifunctional inhibitor/lipid-transfer protein/seed storage 2S albumin superfamily protein	-5.733
Gh_D11G0251	-3.106	-4.071	Bifunctional inhibitor/lipid-transfer protein/seed storage 2S albumin superfamily protein	-6.533
Gh_A11G0236	-4.941	-4.45	Bifunctional inhibitor/lipid-transfer protein/seed storage 2S albumin superfamily protein	-7.862
Gh_D10G2617	-3.564	-4.738	bifunctional nuclease i	-4.843
Gh_D03G1465	-1.224	-2.856	BON association protein 2	-1.54
Gh_D05G2052	-1.723	-6.104	branched-chain amino acid transaminase 2	-3.018
Gh_D05G2515	-2.255	-7.452	branched-chain amino acid transaminase 2	-2.907
Gh_D03G0254	-2.319	-1.728	BTB and TAZ domain protein 4	-1.627
Gh_A12G2156	-1.772	-1.244	BTB/POZ domain-containing protein	-1.271
Gh_A08G1911	-1.053	-1.8	bZIP transcription factor family protein	-1.283
Gh_D08G2277	-1.293	-2.626	bZIP transcription factor family protein	-1.134
Gh_D11G2561	-1.923	-3.607	bZIP transcription factor family protein	-2.065
Gh_A11G2244	-2.521	-3.996	bZIP transcription factor family protein	-2.165
Gh_D07G2458	-1.542	-1.014	C2H2-like zinc finger protein	-1.412
Gh_A05G1595	-1.167	-1.798	C2H2-like zinc finger protein	-1.734
Gh_A13G1212	-1.481	-1.072	Calcium-binding EF-hand family protein	-1.452
Gh_A01G0537	-1.157	-1.317	Calcium-binding EF-hand family protein	-1
Gh_D01G0551	-1.571	-1.783	Calcium-binding EF-hand family protein	-1.29
Gh_D03G1708	-1.862	-1.864	Calcium-binding EF-hand family protein	-1.32
Gh_D12G1709	-2.135	-1.943	Calcium-binding EF-hand family protein	-2.181
Gh_D12G1143	-1.706	-2.048	Calcium-binding EF-hand family protein	-1.958
Gh_A08G1624	-2.961	-4.231	Calcium-dependent lipid-binding (CaLB domain) family protein	-5.325
Gh_D06G0177	-7.039	-6.932	Calcium-dependent lipid-binding (CaLB domain) family protein	-8.836
Gh_A06G1503	-1.058	-1.778	calcium-dependent protein kinase 21	-1.521
Gh_D09G0573	-4.579	-3.799	Caleosin-related family protein	-2.047
Gh_D04G0682	-1.861	-2.202	calmodulin binding	-2.324
Gh_A08G0723	-1.613	-1.549	calmodulin-binding family protein	-1.428
Gh_D07G1010	-1.301	-1.12	calmodulin-binding receptor-like cytoplasmic kinase 1	-2.118
Gh_A08G0770	-1.107	-1.096	CAP (Cysteine-rich secretory proteins, Antigen 5, and Pathogenesis-related 1 protein) superfamily protein	-1.29
Gh_A05G0532	-1.946	-1.11	CAP (Cysteine-rich secretory proteins, Antigen 5, and Pathogenesis-related 1 protein) superfamily protein	-2.733
Gh_D05G0873	-3.073	-2.604	cation exchanger 3	-4.254
Gh_A02G1014	-1.675	-3.464	cation/H+ exchanger 18	-2.811
Gh_A08G0773	-1.477	-1.433	CBL-interacting protein kinase 21	-1.257
Gh_D08G0921	-1.505	-1.641	CBL-interacting protein kinase 21	-1.728
Gh_A11G0911	-2.418	-2.833	CBL-interacting protein kinase 9	-1.249
Gh_A05G0346	-1.11	-2.386	CCCH-type zinc finger family protein	-2.043
Gh_A09G1690	-2.124	-2.966	cellulose synthase like G3	-2.093
Gh_A05G1147	-2.166	-1.346	Chaperone DnaJ-domain superfamily protein	-1.16
Gh_D01G0937	-1.947	-2.703	Chaperone DnaJ-domain superfamily protein	-1.703
Gh_D05G1324	-3.669	-2.825	Chaperone DnaJ-domain superfamily protein	-2.008
Gh_D12G1290	-6.35	-5.939	Chaperone DnaJ-domain superfamily protein	-4.725
Gh_D11G1103	-1.514	-1.303	Chitinase family protein	-1.242
Gh_D12G2112	-5.401	-5.761	chloroplast beta-amylase	-4.6
Gh_A12G1931	-8.04	-7.939	chloroplast beta-amylase	-8.04
Gh_D05G0604	-1.671	-1.682	chorismate mutase 2	-1.537
Gh_A03G0238	-3.066	-3.27	CHY-type/CTCHY-type/RING-type Zinc finger protein	-2.691
Gh_A01G0028	-1.951	-1.927	cold shock domain protein 3	-2.053
Gh_D09G1207	-1.639	-3.163	Concanavalin A-like lectin protein kinase family protein	-2.645
Gh_D06G0284	-1.443	-1.678	copper ion binding;electron carriers	-3.195
Gh_A06G0262	-1.54	-2.092	copper ion binding;electron carriers	-3.488
Gh_A13G1450	-1.565	-1.332	copper/zinc superoxide dismutase 1	-1.433
Gh_A05G2424	-1.057	-1.58	CP12 domain-containing protein 3	-1.086
Gh_A13G1663	-1.453	-1.432	CTC-interacting domain 7	-1.104
Gh_D05G1600	-1.165	-1.759	C-terminal cysteine residue is changed to a serine 1	-1.376
Gh_D01G0574	-2.807	-2.226	C-terminal cysteine residue is changed to a serine 1	-1.721
Gh_A01G0565	-3.671	-3.353	C-terminal cysteine residue is changed to a serine 1	-2.895
Gh_A12G0470	-2.078	-2.409	CTP synthase family protein	-1.777
Gh_D12G0472	-2.542	-3.255	CTP synthase family protein	-2.643
Gh_D03G0412	-1.902	-1.397	Cupredoxin superfamily protein	-1.514
Gh_D01G0078	-1.309	-1.295	Cyclase family protein	-2.232
Gh_D11G0828	-1.508	-1.158	cyclin p3;1	-1.493
Gh_A08G1232	-1.392	-1.23	cyclin p3;2	-1.152
Gh_A09G2214	-2.405	-3.834	Cyclopropane-fatty-acyl-phospholipid synthase	-3.111
Gh_D03G0970	-2.177	-2.81	Cysteine proteinases superfamily protein	-5.291
Gh_A07G2002	-1.584	-2.734	Cysteine/Histidine-rich C1 domain family protein	-3.831
Gh_A12G2397	-1.887	-3.08	cytochrome P450, family 706, subfamily A, polypeptide 4	-1.571
Gh_D12G2194	-1.39	-1.215	cytochrome P450, family 706, subfamily A, polypeptide 7	-2.174
Gh_A08G1344	-1.46	-1.433	cytochrome P450, family 707, subfamily A, polypeptide 3	-1.489
Gh_D08G1639	-1.825	-1.603	cytochrome P450, family 707, subfamily A, polypeptide 3	-1.436
Gh_Sca010971G01	-2.288	-2.903	cytochrome P450, family 71, subfamily B, polypeptide 13	-4.098
Gh_A13G0155	-2.502	-2.92	cytochrome P450, family 714, subfamily A, polypeptide 1	-2.746
Gh_A13G0154	-3.701	-4.325	cytochrome P450, family 714, subfamily A, polypeptide 1	-2.47
Gh_A10G0050	-1.398	-2.874	cytochrome P450, family 716, subfamily A, polypeptide 1	-3.698
Gh_D09G2440	-2.189	-1.785	cytochrome P450, family 76, subfamily G, polypeptide 1	-2.461
Gh_D11G3255	-2.332	-3.136	cytochrome P450, family 76, subfamily G, polypeptide 1	-5.569
Gh_A11G2871	-7.649	-7.579	cytochrome P450, family 76, subfamily G, polypeptide 1	-10.034
Gh_A11G0905	-4.613	-6.027	cytochrome P450, family 78, subfamily A, polypeptide 6	-7.18
Gh_A05G1709	-2.931	-4.236	cytochrome P450, family 82, subfamily C, polypeptide 4	-4.87
Gh_A10G1722	-4.735	-4.663	cytochrome P450, family 83, subfamily B, polypeptide 1	-4.474
Gh_D07G0268	-1.559	-2.297	Cytosol aminopeptidase family protein	-1.726
Gh_A04G0821	-1.187	-1.901	D-alanine--D-alanine ligase family	-1.465
Gh_D04G1320	-1.16	-2.001	D-alanine--D-alanine ligase family	-1.397
Gh_A01G1508	-1.478	-1.492	D-aminoacid aminotransferase-like PLP-dependent enzymes superfamily protein	-2.06
Gh_D03G0583	-2.364	-1.803	delta tonoplast integral protein	-1.776
Gh_D10G2009	-2.058	-1.605	deoxyhypusine synthase	-1.833
Gh_D08G0270	-1.588	-1.484	Deoxyxylulose-5-phosphate synthase	-1.854
Gh_A08G0193	-1.875	-2	Deoxyxylulose-5-phosphate synthase	-2.803
Gh_D08G2651	-1.467	-1.174	diacylglycerol kinase 7	-2.123
Gh_D06G1984	-1.136	-1.225	Disease resistance protein (CC-NBS-LRR class) family	-1.318
Gh_D01G0175	-1.199	-1.503	Disease resistance protein (CC-NBS-LRR class) family	-1.821
Gh_D13G2231	-1.355	-1.15	Disease resistance-responsive (dirigent-like protein) family protein	-1.464
Gh_A04G0069	-1.064	-1.491	Disease resistance-responsive (dirigent-like protein) family protein	-1.646
Gh_A12G2689	-1.691	-2.144	Disease resistance-responsive (dirigent-like protein) family protein	-2.506
Gh_D02G0068	-1.438	-1.507	D-mannose binding lectin protein with Apple-like carbohydrate-binding domain	-1.004
Gh_D04G1888	-1.407	-1.19	DNA glycosylase superfamily protein	-2.905
Gh_A12G0130	-1.297	-2.017	DNAJ heat shock family protein	-1.644
Gh_D02G1378	-1.872	-1.298	DNAse I-like superfamily protein	-2.184
Gh_A03G0991	-1.808	-1.47	DNAse I-like superfamily protein	-2.38
Gh_D01G0080	-1.924	-1.09	Domain of unknown function (DUF303)	-2.508
Gh_D05G0887	-2.22	-1.532	Duplicated homeodomain-like superfamily protein	-1.848
Gh_D09G1543	-2.703	-3.871	Duplicated homeodomain-like superfamily protein	-4.297
Gh_D07G1373	-1.158	-2.083	DYNAMIN-like 1B	-1.804
Gh_D10G1249	-1.129	-2.37	electron-transfer flavoprotein:ubiquinone oxidoreductase	-1.222
Gh_A10G1241	-1.056	-2.9	electron-transfer flavoprotein:ubiquinone oxidoreductase	-1.077
Gh_D11G3000	-1.452	-2.012	ERECTA-like 2	-1.664
Gh_A11G0583	-1.986	-2.349	Esterase/lipase/thioesterase family protein	-2.556
Gh_A07G0379	-2.886	-2.007	ethylene responsive element binding factor 1	-3.001
Gh_A08G0537	-1.567	-1.722	ethylene-responsive element binding factor 13	-1.729
Gh_D08G0629	-1.787	-2.202	ethylene-responsive element binding factor 13	-1.938
Gh_D08G1310	-1.638	-1.643	ethylene-responsive element binding protein	-1.378
Gh_A05G2421	-2.091	-1.229	Eukaryotic aspartyl protease family protein	-2.403
Gh_A10G0679	-1.886	-1.349	Eukaryotic aspartyl protease family protein	-1.457
Gh_A05G0509	-1.374	-1.871	Eukaryotic aspartyl protease family protein	-3.051
Gh_D05G2687	-2.437	-1.965	Eukaryotic aspartyl protease family protein	-3.137
Gh_D05G0628	-1.388	-2.003	Eukaryotic aspartyl protease family protein	-2.929
Gh_D06G1552	-3.02	-2.285	Eukaryotic aspartyl protease family protein	-3.88
Gh_A05G2762	-2.058	-2.427	Eukaryotic aspartyl protease family protein	-1.39
Gh_D10G0708	-3.298	-2.743	Eukaryotic aspartyl protease family protein	-2.653
Gh_A06G1230	-2.616	-3.188	Eukaryotic aspartyl protease family protein	-4.846
Gh_D06G1104	-3.151	-6.316	Eukaryotic aspartyl protease family protein	-5.095
Gh_A09G0257	-3.095	-2.489	Exonuclease family protein	-3.853
Gh_D01G0492	-3.793	-2.125	expansin 12	-3.748
Gh_A01G0477	-4.181	-2.323	expansin 12	-3.62
Gh_A07G1208	-1.693	-1.097	expansin A17	-1.169
Gh_A03G2186	-1.993	-3.63	expansin-like A1	-1.683
Gh_D01G1679	-1.161	-1.237	expansin-like A2	-1.11
Gh_A10G0066	-1.431	-1.247	FAD-binding Berberine family protein	-2.346
Gh_D06G1118	-1.841	-1.545	FAD-dependent oxidoreductase family protein	-2.108
Gh_A06G0948	-1.67	-1.58	FAD-dependent oxidoreductase family protein	-1.812
Gh_D07G0424	-1.296	-1.276	Family of unknown function (DUF566)	-1.412
Gh_A09G0998	-1.543	-1.26	FASCICLIN-like arabinogalactan-protein 12	-2.484
Gh_A07G1070	-2.041	-2.379	FASCICLIN-like arabinogalactan-protein 12	-2.186
Gh_D05G0485	-2.39	-1.644	F-box/RNI-like superfamily protein	-1.456
Gh_A05G0370	-2.224	-2.24	F-box/RNI-like superfamily protein	-1.32
Gh_D09G1582	-1.235	-2.239	ferretin 1	-2.326
Gh_A09G2418	-2.956	-2.515	ferretin 1	-2.607
Gh_D12G1525	-1.129	-1.538	flavin-binding, kelch repeat, f box 1	-1.834
Gh_A08G1012	-1.828	-1.626	Flavin-containing monooxygenase family protein	-2.393
Gh_D04G0459	-2.376	-2.385	Galactose mutarotase-like superfamily protein	-2.32
Gh_A10G0706	-1.68	-1.817	Galactose oxidase/kelch repeat superfamily protein	-1.718
Gh_A04G0455	-2.19	-5.071	Galactose oxidase/kelch repeat superfamily protein	-1.625
Gh_D12G1492	-4.032	-6.422	Galactose oxidase/kelch repeat superfamily protein	-6.609
Gh_D12G0567	-2.272	-2.197	GAST1 protein homolog 1	-2.085
Gh_A05G1919	-1.353	-1.292	GDSL-like Lipase/Acylhydrolase superfamily protein	-1.251
Gh_A10G0914	-1.584	-1.594	GDSL-like Lipase/Acylhydrolase superfamily protein	-1.863
Gh_A13G1426	-3.455	-3.743	GDSL-like Lipase/Acylhydrolase superfamily protein	-3.067
Gh_A12G2368	-3.22	-2.239	Glucose-methanol-choline (GMC) oxidoreductase family protein	-2.947
Gh_A08G1891	-1.221	-3.462	glutamate dehydrogenase 3	-1.62
Gh_D08G2256	-1.215	-3.551	glutamate dehydrogenase 3	-1.464
Gh_D05G0637	-1.49	-1.449	glutamine dumper 1	-3.454
Gh_A05G0518	-2.713	-2.845	glutamine dumper 3	-3.366
Gh_D05G1561	-1.28	-1.099	glycine-rich protein	-1.193
Gh_A09G0635	-1.093	-1.522	Glycosyl hydrolase superfamily protein	-1.496
Gh_D09G1436	-1.51	-1.25	glyoxal oxidase-related protein	-1.702
Gh_D11G1500	-1.166	-1.61	glyoxylate reductase 1	-1.308
Gh_D02G1932	-1.655	-1.709	GRAM domain-containing protein / ABA-responsive protein-related	-1.602
Gh_D13G0595	-1.602	-2.334	GRAM domain-containing protein / ABA-responsive protein-related	-1.859
Gh_D12G1331	-2.213	-2.399	GRAM domain-containing protein / ABA-responsive protein-related	-2.227
Gh_D02G1931	-1.716	-2.689	GRAM domain-containing protein / ABA-responsive protein-related	-1.719
Gh_A03G1467	-1.92	-2.925	GRAM domain-containing protein / ABA-responsive protein-related	-1.982
Gh_A13G0536	-2.058	-2.951	GRAM domain-containing protein / ABA-responsive protein-related	-2.235
Gh_A12G1208	-3.504	-3.205	GRAM domain-containing protein / ABA-responsive protein-related	-3.054
Gh_A11G1803	-3.618	-2.696	Granulin repeat cysteine protease family protein	-2.203
Gh_D11G1967	-3.916	-3.211	Granulin repeat cysteine protease family protein	-2.994
Gh_D07G0833	-1.782	-1.133	GRF zinc finger / Zinc knuckle protein	-1.091
Gh_A07G0764	-2.203	-1.666	GRF zinc finger / Zinc knuckle protein	-1.392
Gh_D10G1086	-1.195	-2.362	GroES-like zinc-binding alcohol dehydrogenase family protein	-1.585
Gh_D07G1517	-1.787	-1.019	HAD superfamily, subfamily IIIB acid phosphatase	-1.347
Gh_A12G1807	-1.496	-1.087	Haloacid dehalogenase-like hydrolase (HAD) superfamily protein	-1.407
Gh_D12G1978	-1.438	-1.156	Haloacid dehalogenase-like hydrolase (HAD) superfamily protein	-1.557
Gh_A03G1983	-1.533	-1.424	Haloacid dehalogenase-like hydrolase (HAD) superfamily protein	-1.714
Gh_D03G1545	-2.177	-1.77	Haloacid dehalogenase-like hydrolase (HAD) superfamily protein	-2.177
Gh_D07G1257	-1.329	-2.264	Haloacid dehalogenase-like hydrolase (HAD) superfamily protein	-1.434
Gh_D12G1234	-1.01	-1.172	HCO3- transporter family	-1.196
Gh_A08G0745	-1.39	-1.512	heavy metal atpase 2	-1.122
Gh_D05G0030	-1.415	-1.609	heavy metal atpase 2	-1.082
Gh_D08G2126	-1.019	-1.153	Heavy metal transport/detoxification superfamily protein	-1.09
Gh_D08G1473	-1.097	-1.169	Heavy metal transport/detoxification superfamily protein	-1.123
Gh_A08G1780	-1.331	-1.372	Heavy metal transport/detoxification superfamily protein	-1.251
Gh_D09G1375	-1.274	-2.667	Heavy metal transport/detoxification superfamily protein	-2.403
Gh_D04G1066	-3.098	-3.119	Heavy metal transport/detoxification superfamily protein	-2.946
Gh_A04G0606	-4.219	-4.666	Heavy metal transport/detoxification superfamily protein	-3.716
Gh_D06G1722	-1.723	-4.739	Heavy metal transport/detoxification superfamily protein	-5.12
Gh_A08G2535	-1.154	-1.232	hercules receptor kinase 1	-1.332
Gh_A04G1215	-1.884	-1.312	high-affinity K+ transporter 1	-1.548
Gh_A05G1856	-1.883	-2.983	Homeobox-leucine zipper protein family	-1.897
Gh_A03G0881	-1.487	-1.107	Homeodomain-like superfamily protein	-1.459
Gh_D05G1617	-2.162	-1.322	HSP20-like chaperones superfamily protein	-2.581
Gh_A06G0385	-2.262	-3.228	HSP40/DnaJ peptide-binding protein	-2.569
Gh_A08G2014	-2.025	-2.134	HXXXD-type acyl-transferase family protein	-3.805
Gh_A08G1491	-2.06	-2.272	HXXXD-type acyl-transferase family protein	-2.266
Gh_A12G1822	-3.895	-4.097	HXXXD-type acyl-transferase family protein	-3.713
Gh_A06G1699	-1.841	-2.931	hydroxycinnamoyl-CoA shikimate/quinate hydroxycinnamoyl transferase	-4.235
Gh_A11G2166	-2.355	-1.121	hydroxyproline-rich glycoprotein family protein	-2.6
Gh_A11G2503	-1.428	-2.64	importin alpha isoform 1	-3.009
Gh_D06G2010	-1.342	-1.313	indole-3-acetic acid inducible 19	-1.913
Gh_A06G1191	-2.341	-2.039	inflorescence meristem receptor-like kinase 2	-1.932
Gh_A10G0070	-1.566	-2.136	inflorescence meristem receptor-like kinase 2	-1.714
Gh_D02G0497	-2.236	-2.268	inosine-uridine preferring nucleoside hydrolase family protein	-1.895
Gh_A04G1076	-1.404	-2.607	Inositol monophosphatase family protein	-1.424
Gh_D04G1683	-1.758	-2.931	Inositol monophosphatase family protein	-1.634
Gh_D05G0489	-1.798	-1.367	Integrase-type DNA-binding superfamily protein	-1.712
Gh_D07G0440	-4.179	-5.264	Integrase-type DNA-binding superfamily protein	-5.552
Gh_A06G1397	-1.406	-1.238	IQ-domain 11	-1.132
Gh_A04G0649	-2.31	-2.594	IQ-domain 2	-2.586
Gh_D05G3861	-1.671	-1.051	IQ-domain 26	-1.923
Gh_A08G2199	-1.015	-1.467	jasmonate-zim-domain protein 1	-1.509
Gh_A10G2244	-1.181	-1.562	jasmonate-zim-domain protein 6	-1.383
Gh_D10G0531	-1.598	-2.01	jasmonate-zim-domain protein 6	-1.759
Gh_D05G3842	-2.546	-1.807	jasmonate-zim-domain protein 8	-2.967
Gh_D02G1633	-1.563	-1.679	KNOTTED1-like homeobox gene 6	-1.482
Gh_D04G0197	-1.823	-2.034	Kunitz family trypsin and protease inhibitor protein	-1.659
Gh_D13G0253	-1.851	-1.12	laccase 11	-2.558
Gh_A13G0237	-1.867	-1.37	laccase 11	-2.902
Gh_A05G2115	-2.901	-3.557	laccase 14	-4.496
Gh_D05G2355	-1.549	-3.788	laccase 14	-3.418
Gh_A05G2114	-2.273	-4.034	laccase 14	-4.529
Gh_A04G0744	-2.231	-1.256	laccase 7	-2.328
Gh_A13G2215	-1.855	-2.394	laccase 7	-2.311
Gh_D13G2524	-1.307	-2.577	laccase 7	-3.413
Gh_D04G1243	-1.444	-1.427	Laccase/Diphenol oxidase family protein	-2.456
Gh_D10G0718	-1.424	-2.204	Lactoylglutathione lyase / glyoxalase I family protein	-1.041
Gh_A10G0878	-5.622	-4.719	Lactoylglutathione lyase / glyoxalase I family protein	-4.736
Gh_D10G0875	-5.841	-5.341	Lactoylglutathione lyase / glyoxalase I family protein	-3.865
Gh_D08G1255	-3.203	-2.217	Late embryogenesis abundant (LEA) hydroxyproline-rich glycoprotein family	-2.144
Gh_D07G1169	-3.074	-3.371	Late embryogenesis abundant (LEA) protein-related	-2.298
Gh_D11G0978	-1.742	-1.238	Late embryogenesis abundant protein	-1.973
Gh_D01G0369	-1.563	-3.401	Leucine-rich receptor-like protein kinase family protein	-2.245
Gh_D11G2994	-2.754	-3.242	Leucine-rich repeat protein kinase family protein	-3.853
Gh_A11G1221	-1.29	-1.469	Leucine-rich repeat receptor-like protein kinase family protein	-1.47
Gh_D10G0357	-3.121	-3.283	Leucine-rich repeat receptor-like protein kinase family protein	-3.341
Gh_D05G0478	-1.18	-1.17	Leucine-rich repeat transmembrane protein kinase	-1.397
Gh_A04G1029	-1.252	-1.287	Leucine-rich repeat transmembrane protein kinase	-2.045
Gh_A10G0444	-1.516	-1.29	Leucine-rich repeat transmembrane protein kinase	-1.498
Gh_D13G1725	-1.836	-1.454	Leucine-rich repeat transmembrane protein kinase	-2.53
Gh_A13G1410	-1.843	-1.502	Leucine-rich repeat transmembrane protein kinase	-2.698
Gh_D04G1583	-1.581	-1.522	Leucine-rich repeat transmembrane protein kinase	-2.736
Gh_D01G1046	-1.678	-1.601	Leucine-rich repeat transmembrane protein kinase	-1.84
Gh_A01G0328	-1.075	-2.405	Leucine-rich repeat transmembrane protein kinase	-2.281
Gh_A10G0446	-3.223	-3.819	Leucine-rich repeat transmembrane protein kinase	-3.659
Gh_A11G2604	-3.846	-4.052	Leucine-rich repeat transmembrane protein kinase	-6.225
Gh_A05G0844	-4.757	-4.963	Leucine-rich repeat transmembrane protein kinase protein	-5.376
Gh_A05G3105	-3.658	-2.283	LOB domain-containing protein 25	-2.508
Gh_A09G0469	-2.861	-1.889	LOB domain-containing protein 42	-1.919
Gh_D11G2949	-1.296	-1.07	LRR and NB-ARC domains-containing disease resistance protein	-1.303
Gh_D06G0864	-1.804	-2.572	lysine-ketoglutarate reductase/saccharopine dehydrogenase bifunctional enzyme	-1.615
Gh_A03G2141	-1.314	-1.13	Major facilitator superfamily protein	-1.211
Gh_D06G0051	-1.675	-1.45	Major facilitator superfamily protein	-1.796
Gh_A02G0445	-2.453	-2.298	Major facilitator superfamily protein	-1.822
Gh_D03G0234	-1.321	-1.304	Malectin/receptor-like protein kinase family protein	-1.598
Gh_A03G1748	-1.49	-1.086	MATE efflux family protein	-1.469
Gh_A05G1449	-1.423	-1.377	MATE efflux family protein	-2.216
Gh_D01G0358	-2.071	-1.003	mechanosensitive channel of small conductance-like 6	-1.775
Gh_A05G1688	-1.659	-2.373	metalloendopeptidases;zinc ion binding	-1.542
Gh_A11G0422	-1.568	-1.712	methyl esterase 10	-1.813
Gh_A11G0421	-1.853	-1.882	methyl esterase 10	-2.563
Gh_A05G2377	-1.683	-2.525	methyl esterase 17	-2.795
Gh_A11G1551	-2.126	-1.659	Methylenetetrahydrofolate reductase family protein	-3.402
Gh_D11G1706	-2.057	-1.837	Methylenetetrahydrofolate reductase family protein	-3.168
Gh_A06G1279	-1.351	-2.847	methylesterase PCR A	-1.955
Gh_A11G2355	-1.591	-1.788	Methyltransferase-related protein	-1.563
Gh_D11G2667	-1.747	-1.868	Methyltransferase-related protein	-1.537
Gh_D02G1527	-1.071	-1.094	microtubule-associated protein 65-8	-1.474
Gh_A03G1102	-1.36	-1.318	microtubule-associated protein 65-8	-1.624
Gh_Sca039726G01	-4.188	-4.59	mitochondrial F0-ATPase subunit 9	-2.968
Gh_D02G1447	-1.393	-1.007	MLP-like protein 28	-1.671
Gh_Sca005880G01	-1.687	-1.547	MLP-like protein 28	-2.044
Gh_A06G0678	-1.139	-1.347	Mob1/phocein family protein	-1.987
Gh_D06G0778	-2.149	-2.145	Mob1/phocein family protein	-2.001
Gh_D04G1809	-1.185	-1.154	multidrug resistance-associated protein 3	-1.234
Gh_A08G2408	-1.475	-1.07	myb domain protein 111	-1.183
Gh_D07G2291	-1.507	-2.019	myb domain protein 40	-2.481
Gh_A13G1994	-3.484	-4.835	myb domain protein 48	-3.655
Gh_D13G2393	-3.895	-5.423	myb domain protein 48	-3.014
Gh_A08G1517	-1.316	-1.069	myb domain protein 4r1	-1.212
Gh_A05G1721	-1.721	-1.596	myb domain protein 4r1	-1.405
Gh_D05G2051	-1.366	-1.307	myb domain protein 68	-1.197
Gh_A05G1854	-2.034	-1.886	myb domain protein 68	-1.85
Gh_D05G1106	-1.631	-1.438	myb-like HTH transcriptional regulator family protein	-1.205
Gh_A12G1550	-1.479	-2.147	myb-like transcription factor family protein	-1.196
Gh_A06G0608	-3.029	-4.147	myo-inositol oxygenase 4	-3.535
Gh_D06G0690	-3.998	-4.809	myo-inositol oxygenase 4	-4.432
Gh_Sca004857G03	-7.705	-8.996	myo-inositol oxygenase 4	-2.633
Gh_D03G1637	-5.199	-7.034	myo-inositol oxygenase 5	-4.643
Gh_A05G1615	-1.976	-1.062	N/A	-1.441
Gh_D01G2159	-1.288	-1.066	N/A	-1.998
Gh_D06G1640	-2.439	-1.095	N/A	-2.463
Gh_A02G1403	-1.219	-1.099	N/A	-1.113
Gh_D02G2168	-1.876	-1.12	N/A	-1.617
Gh_A11G2139	-2.115	-1.14	N/A	-2.054
Gh_D05G1035	-1.136	-1.149	N/A	-1.207
Gh_A05G3102	-1.067	-1.187	N/A	-1.311
Gh_D12G1737	-1.005	-1.196	N/A	-1.397
Gh_A09G0686	-1.27	-1.203	N/A	-2.114
Gh_A01G0464	-1.171	-1.211	N/A	-1.541
Gh_A13G0810	-1.702	-1.213	N/A	-2.744
Gh_D13G1050	-1.996	-1.234	N/A	-2.736
Gh_Sca024656G01	-1.304	-1.263	N/A	-1.583
Gh_A01G1657	-1.393	-1.265	N/A	-1.427
Gh_D11G2521	-1.629	-1.273	N/A	-1.562
Gh_D07G1914	-3.054	-1.301	N/A	-2.07
Gh_A13G0821	-1.638	-1.312	N/A	-1.557
Gh_D08G0456	-1.432	-1.341	N/A	-2.281
Gh_A02G1523	-1.108	-1.344	N/A	-1.858
Gh_A05G3657	-2.113	-1.354	N/A	-1.11
Gh_D01G0316	-1.324	-1.368	N/A	-1.176
Gh_A01G2058	-1.156	-1.376	N/A	-1.438
Gh_A01G2059	-1.727	-1.4	N/A	-1.568
Gh_D02G1738	-1.151	-1.408	N/A	-1.096
Gh_D01G1906	-2.061	-1.43	N/A	-1.959
Gh_D04G0537	-1.557	-1.477	N/A	-2.101
Gh_A08G0358	-1.564	-1.498	N/A	-1.874
Gh_A04G0040	-1.499	-1.551	N/A	-1.32
Gh_A08G1330	-1.199	-1.575	N/A	-1.036
Gh_A02G1750	-1.817	-1.588	N/A	-1.23
Gh_D12G1233	-1.322	-1.59	N/A	-1.236
Gh_A13G2296	-1.865	-1.591	N/A	-1.727
Gh_D13G1911	-1.948	-1.593	N/A	-2.071
Gh_A03G1300	-1.149	-1.604	N/A	-1.073
Gh_A11G1773	-1.237	-1.628	N/A	-2.466
Gh_D07G0846	-1.676	-1.644	N/A	-2.16
Gh_D05G1621	-1.514	-1.681	N/A	-1.436
Gh_D13G1751	-1.29	-1.691	N/A	-1.384
Gh_A13G0809	-2.173	-1.695	N/A	-2.379
Gh_A12G0550	-2.453	-1.765	N/A	-2.502
Gh_D03G0401	-1.685	-1.804	N/A	-1.335
Gh_A05G1347	-1.743	-1.818	N/A	-2.151
Gh_D08G2497	-1.396	-1.84	N/A	-1.273
Gh_A08G2549	-1.42	-1.854	N/A	-1.876
Gh_A01G0930	-1.516	-1.864	N/A	-1.712
Gh_D05G3810	-1.609	-1.881	N/A	-1.79
Gh_D11G1495	-1.812	-1.919	N/A	-1.503
Gh_D09G0494	-1.845	-1.986	N/A	-1.108
Gh_D07G0732	-1.298	-1.992	N/A	-1.306
Gh_A08G2125	-1.634	-2.032	N/A	-1.839
Gh_D08G1585	-2.892	-2.12	N/A	-2.532
Gh_Sca010800G01	-1.091	-2.124	N/A	-1.45
Gh_A12G2583	-1.164	-2.138	N/A	-1.213
Gh_D02G1335	-1.191	-2.163	N/A	-1.644
Gh_D07G2262	-2.566	-2.202	N/A	-1.25
Gh_D11G3529	-1.983	-2.251	N/A	-3.162
Gh_A07G2049	-3.064	-2.357	N/A	-1.527
Gh_D04G0571	-3.899	-2.363	N/A	-2.706
Gh_A08G1293	-3.115	-2.388	N/A	-2.736
Gh_A05G0950	-2.586	-2.591	N/A	-2.711
Gh_A02G0791	-2.293	-2.684	N/A	-3.061
Gh_D06G1358	-4.636	-2.7	N/A	-1.924
Gh_A03G0003	-2.258	-2.704	N/A	-2.557
Gh_A06G1774	-3.473	-2.764	N/A	-3.477
Gh_D13G2057	-1.57	-2.819	N/A	-2.125
Gh_A01G0284	-2.803	-2.831	N/A	-2.832
Gh_D05G2008	-4.38	-2.897	N/A	-3.926
Gh_A13G1763	-1.369	-2.995	N/A	-1.582
Gh_D05G2288	-1.989	-3.169	N/A	-3.218
Gh_Sca006959G01	-3.857	-3.18	N/A	-3.249
Gh_D12G0905	-2.307	-3.215	N/A	-2.072
Gh_D02G2158	-2.042	-3.236	N/A	-2.59
Gh_A05G1288	-2.643	-3.321	N/A	-2.718
Gh_A13G1708	-1.554	-3.395	N/A	-2.606
Gh_A02G0378	-2.918	-3.456	N/A	-2.388
Gh_D05G3826	-2.958	-3.489	N/A	-3.121
Gh_A13G1481	-4.543	-3.496	N/A	-3.499
Gh_D05G2195	-1.511	-3.53	N/A	-1.944
Gh_D13G0324	-4.041	-3.625	N/A	-3.081
Gh_A02G0379	-2.686	-3.66	N/A	-4.054
Gh_D07G0161	-1.885	-3.889	N/A	-1.461
Gh_A13G2098	-4.48	-3.931	N/A	-3.283
Gh_A07G2349	-2.004	-4.414	N/A	-1.195
Gh_D10G0699	-2.822	-4.502	N/A	-3.679
Gh_A03G1726	-2.877	-4.605	N/A	-3.085
Gh_D06G2027	-1.629	-4.75	N/A	-2.982
Gh_D03G0192	-2.051	-4.929	N/A	-4.017
Gh_A13G1483	-4.002	-5.384	N/A	-7.053
Gh_D04G0351	-2.031	-5.399	N/A	-3.61
Gh_A06G1529	-2.738	-5.73	N/A	-4.186
Gh_D04G0824	-5.119	-6.274	N/A	-4.089
Gh_A03G0002	-3.993	-7.374	N/A	-3.992
Gh_D02G0122	-1.713	-2.135	NAC 014	-3.115
Gh_D07G1437	-1.386	-1.404	NAD(P)-binding Rossmann-fold superfamily protein	-1.14
Gh_A07G2139	-1.53	-1.406	NAD(P)-binding Rossmann-fold superfamily protein	-1.847
Gh_A05G0783	-1.41	-1.576	NAD(P)-binding Rossmann-fold superfamily protein	-2.021
Gh_Sca005107G01	-1.34	-1.595	NAD(P)-binding Rossmann-fold superfamily protein	-2.033
Gh_D01G2260	-1.282	-1.651	NAD(P)-binding Rossmann-fold superfamily protein	-1.688
Gh_D08G1234	-1.966	-1.659	NAD(P)-binding Rossmann-fold superfamily protein	-3.701
Gh_D11G1920	-3.186	-2.746	NAD(P)-binding Rossmann-fold superfamily protein	-4.783
Gh_A03G1620	-4.531	-6.103	NAD(P)-binding Rossmann-fold superfamily protein	-6.796
Gh_D02G2034	-5.316	-6.269	NAD(P)-binding Rossmann-fold superfamily protein	-5.941
Gh_D08G2273	-3.046	-3.163	NAD(P)-linked oxidoreductase superfamily protein	-2.339
Gh_D04G1630	-2.953	-4.667	NAD(P)-linked oxidoreductase superfamily protein	-3.988
Gh_A06G0827	-1.263	-1.493	NADP-malic enzyme 3	-1.14
Gh_D06G0959	-1.55	-2.038	NADP-malic enzyme 3	-1.604
Gh_D05G3410	-2.162	-2.136	NB-ARC domain-containing disease resistance protein	-2.723
Gh_A11G2836	-1.363	-2.203	NB-ARC domain-containing disease resistance protein	-1.579
Gh_A04G0287	-4.127	-3.637	NB-ARC domain-containing disease resistance protein	-3.243
Gh_A07G0494	-1.591	-1.875	nitrate transmembrane transporters	-1.955
Gh_A03G0028	-3.077	-3.019	nitrate transporter 1.5	-2.346
Gh_A05G1715	-6.105	-9.015	nitrate transporter 1:2	-4.308
Gh_D06G0925	-1.448	-1.837	N-MYC downregulated-like 1	-1.209
Gh_D11G0733	-2.814	-1.771	NOD26-like intrinsic protein 4;2	-1.442
Gh_D11G0716	-1.307	-2.219	nodulin MtN21 /EamA-like transporter family protein	-1.481
Gh_A04G0684	-1.923	-2.234	nodulin MtN21 /EamA-like transporter family protein	-3.205
Gh_A06G0361	-1.215	-2.343	nodulin MtN21 /EamA-like transporter family protein	-3.023
Gh_D06G0391	-3.416	-4.422	nodulin MtN21 /EamA-like transporter family protein	-4.213
Gh_D05G0061	-3.966	-4.625	nodulin MtN21 /EamA-like transporter family protein	-3.867
Gh_D13G1900	-4.398	-5.176	nodulin MtN21 /EamA-like transporter family protein	-6.74
Gh_D05G2224	-4.507	-6.084	nodulin MtN21 /EamA-like transporter family protein	-6.486
Gh_D11G1347	-6.588	-6.66	nodulin MtN21 /EamA-like transporter family protein	-8.384
Gh_A13G1563	-5.792	-6.762	nodulin MtN21 /EamA-like transporter family protein	-8.205
Gh_A01G1590	-9.77	-11.935	nodulin MtN21 /EamA-like transporter family protein	-9.77
Gh_D01G1867	-10.71	-12.368	nodulin MtN21 /EamA-like transporter family protein	-10.71
Gh_D10G1709	-1.647	-1.454	Nodulin MtN3 family protein	-1.915
Gh_A03G0461	-2.416	-1.628	Nodulin MtN3 family protein	-1.272
Gh_D02G0542	-2.32	-2.009	Nodulin MtN3 family protein	-5.767
Gh_A10G1468	-3.503	-2.894	Nodulin MtN3 family protein	-2.976
Gh_D12G2692	-6.627	-8.442	Nodulin MtN3 family protein	-6.627
Gh_D06G0179	-1.943	-3.264	N-terminal nucleophile aminohydrolases (Ntn hydrolases) superfamily protein	-2.211
Gh_A06G0183	-3.304	-5.354	N-terminal nucleophile aminohydrolases (Ntn hydrolases) superfamily protein	-4.241
Gh_A04G0876	-1.4	-1.583	nudix hydrolase homolog 13	-1.18
Gh_D04G1377	-1.53	-2.165	nudix hydrolase homolog 13	-1.869
Gh_A10G0281	-1.523	-1.076	nudix hydrolase homolog 15	-1.237
Gh_D10G0282	-1.623	-1.107	nudix hydrolase homolog 15	-1.536
Gh_A08G1504	-1.573	-1.837	nudix hydrolase homolog 8	-1.971
Gh_D08G1802	-1.034	-1.958	nudix hydrolase homolog 8	-1.406
Gh_D06G1329	-2.51	-2.505	Octicosapeptide/Phox/Bem1p family protein	-2.219
Gh_A06G2074	-3.222	-3.467	Octicosapeptide/Phox/Bem1p family protein	-2.795
Gh_A08G0738	-1.356	-1.355	O-Glycosyl hydrolases family 17 protein	-1.085
Gh_D05G0263	-5.845	-5.051	O-Glycosyl hydrolases family 17 protein	-8.433
Gh_D11G0148	-3.327	-3.156	oligopeptide transporter 1	-3.31
Gh_D10G1979	-1.606	-2.276	O-methyltransferase 1	-2.343
Gh_A13G1059	-2.774	-2.066	organic cation/carnitine transporter 3	-3.008
Gh_Sca024064G01	-3.247	-2.693	organic cation/carnitine transporter 3	-3.241
Gh_D13G1325	-3.336	-2.791	organic cation/carnitine transporter 3	-3.79
Gh_D12G2583	-3.767	-5.028	organic cation/carnitine transporter1	-5.423
Gh_D07G0057	-4.192	-2.87	ovate family protein 8	-3.224
Gh_D07G0906	-2.993	-2.354	Oxidoreductase, zinc-binding dehydrogenase family protein	-3.425
Gh_D05G0339	-1.002	-1.638	oxophytodienoate-reductase 3	-1.174
Gh_A03G0854	-1.507	-1.838	PAS/LOV protein B	-1.025
Gh_D11G0495	-1.419	-1.878	PATATIN-like protein 4	-2.554
Gh_A11G0425	-2.033	-2.334	PATATIN-like protein 4	-2.197
Gh_D11G0237	-1.571	-1.27	Pectin lyase-like superfamily protein	-2.003
Gh_A11G0223	-1.575	-1.648	Pectin lyase-like superfamily protein	-2.031
Gh_D05G2792	-1.339	-1.704	Pectin lyase-like superfamily protein	-2.214
Gh_A05G2514	-1.874	-1.756	Pectin lyase-like superfamily protein	-1.831
Gh_D08G1272	-1.644	-2.349	Pectin lyase-like superfamily protein	-1.014
Gh_A08G0999	-1.341	-2.368	Pectin lyase-like superfamily protein	-1.221
Gh_D12G1238	-3.966	-2.662	Pectin lyase-like superfamily protein	-3.349
Gh_A05G1180	-2.066	-1.623	pectin methylesterase 3	-1.557
Gh_D06G0865	-3.118	-2.215	pectin methylesterase 44	-2.306
Gh_D11G1110	-2.316	-1.472	Pectinacetylesterase family protein	-2.036
Gh_D02G0459	-1.913	-3.482	peptide transporter 3	-2.444
Gh_A11G3132	-2.765	-1.783	peroxidase 2	-1.797
Gh_D11G2183	-2.662	-3.42	peroxidase 2	-2.555
Gh_A09G1202	-3.723	-4.48	peroxidase 2	-4.349
Gh_D08G2420	-2.906	-5.195	peroxidase 2	-2.48
Gh_D07G0019	-1.979	-1.975	Peroxidase family protein	-1.737
Gh_D10G1644	-1.472	-1.707	Peroxidase superfamily protein	-1.401
Gh_D11G2151	-1.604	-1.821	Peroxidase superfamily protein	-1.948
Gh_A12G0056	-1.833	-2.513	Peroxidase superfamily protein	-3.721
Gh_A05G3239	-2.172	-2.898	Peroxidase superfamily protein	-3.393
Gh_D04G1506	-1.705	-4.42	Peroxidase superfamily protein	-2.008
Gh_D02G1345	-3.311	-4.448	Peroxidase superfamily protein	-6.711
Gh_D04G1593	-3.567	-6.147	Peroxidase superfamily protein	-5.002
Gh_A04G1453	-5.589	-7.575	Peroxidase superfamily protein	-8.6
Gh_A07G1461	-1.446	-1.868	peroxisomal 3-ketoacyl-CoA thiolase 3	-2.047
Gh_D07G1557	-2.027	-2.377	peroxisomal 3-ketoacyl-CoA thiolase 3	-3.042
Gh_A04G0235	-1.255	-1.668	Peroxisomal membrane 22 kDa (Mpv17/PMP22) family protein	-1.249
Gh_A06G0580	-1.079	-1.672	P-glycoprotein 18	-1.219
Gh_D12G2223	-2.385	-1.625	PGR5-LIKE A	-3.017
Gh_D06G1523	-1.397	-2.506	phloem protein 2-A10	-1.46
Gh_D12G2486	-1.955	-2.521	phloem protein 2-A12	-3.233
Gh_D05G2690	-2.754	-2.935	phloem protein 2-A12	-3.247
Gh_A05G2423	-6.833	-8.096	phloem protein 2-A12	-3.098
Gh_A12G2603	-3.034	-6.303	phloem protein 2-A13	-2.094
Gh_D10G1565	-1.061	-2.336	phosphate 1	-1.962
Gh_A10G0984	-1.054	-2.85	phosphate 1	-1.268
Gh_D05G2079	-1.004	-1.088	Phosphoglycerate mutase family protein	-1.883
Gh_A05G3760	-2.115	-2.243	Phosphoglycerate mutase family protein	-2.988
Gh_A02G1525	-1.803	-1.808	phospholipase A 2A	-1.704
Gh_D07G1048	-1.311	-1.24	Phototropic-responsive NPH3 family protein	-1.114
Gh_D12G1363	-1.357	-2.187	Phototropic-responsive NPH3 family protein	-2.335
Gh_A11G1922	-1.324	-1.978	phytosulfokine 5 precursor	-1.967
Gh_D13G0643	-1.684	-1.319	pinoid-binding protein 1	-1.355
Gh_D08G1661	-1.402	-1.914	pinoresinol reductase 1	-3.305
Gh_A08G1366	-1.266	-2.454	pinoresinol reductase 1	-3
Gh_D10G2613	-1.19	-1.006	PLAC8 family protein	-1.578
Gh_A10G0189	-1.432	-1.26	PLAC8 family protein	-1.307
Gh_A11G0052	-1.626	-1.472	PLAC8 family protein	-1.982
Gh_D11G0056	-5.085	-4.935	PLAC8 family protein	-5.625
Gh_D13G1971	-1.862	-3.981	plant natriuretic peptide A	-2.026
Gh_A12G0031	-1.555	-1.021	Plant protein of unknown function (DUF828)	-1.371
Gh_A04G0794	-1.651	-1.255	Plant protein of unknown function (DUF828)	-2.347
Gh_A05G2880	-1.699	-1.417	Plant protein of unknown function (DUF828)	-1.801
Gh_A03G0660	-1.619	-1.026	Plant protein of unknown function (DUF868)	-1.781
Gh_D03G0958	-1.723	-1.388	Plant protein of unknown function (DUF868)	-1.997
Gh_A05G3717	-1.078	-1.351	Plant protein of unknown function (DUF869)	-1.242
Gh_D08G0007	-1.183	-1.762	plasma membrane intrinsic protein 2	-1.849
Gh_A08G2559	-1.915	-2.322	plasma membrane intrinsic protein 2	-3.293
Gh_A05G0889	-1.235	-1.165	plasma membrane intrinsic protein 2;4	-1.921
Gh_D12G1974	-1.884	-2.415	plasma membrane intrinsic protein 2;4	-3.506
Gh_A01G1406	-1.425	-1.079	plasma membrane intrinsic protein 3	-1.732
Gh_D08G1578	-1.042	-1.287	Plasma-membrane choline transporter family protein	-1.246
Gh_A07G2133	-2.871	-3.155	PLC-like phosphodiesterases superfamily protein	-2.73
Gh_D07G2342	-4.025	-4.903	PLC-like phosphodiesterases superfamily protein	-2.817
Gh_A10G1018	-1.157	-1.671	P-loop containing nucleoside triphosphate hydrolases superfamily protein	-2.532
Gh_A05G2293	-2.424	-1.803	Pollen Ole e 1 allergen and extensin family protein	-2.069
Gh_D10G2388	-2.932	-2.678	Polyketide cyclase/dehydrase and lipid transport superfamily protein	-3.669
Gh_A05G1881	-1.265	-1.159	Predicted AT-hook DNA-binding family protein	-1.12
Gh_D10G0463	-2.231	-3.375	Protein kinase family protein with leucine-rich repeat domain	-4.684
Gh_D04G0569	-1.41	-1.224	Protein kinase superfamily protein	-1.321
Gh_A02G1701	-1.302	-1.504	Protein kinase superfamily protein	-1.445
Gh_A03G2181	-1.208	-1.735	Protein kinase superfamily protein	-2.531
Gh_A01G1533	-1.15	-1.78	Protein kinase superfamily protein	-1.311
Gh_A13G1685	-1.669	-2.077	Protein kinase superfamily protein	-1.972
Gh_D07G0026	-1.656	-2.177	Protein kinase superfamily protein	-1.684
Gh_A11G0474	-1.966	-2.565	Protein kinase superfamily protein	-1.661
Gh_A06G0085	-2.65	-2.485	Protein of unknown function (DUF1195)	-2.219
Gh_D07G1375	-1.335	-1.81	Protein of unknown function (DUF1442)	-2.63
Gh_D08G1032	-1.504	-2.427	Protein of unknown function (DUF1666)	-1.606
Gh_A08G0854	-1.906	-2.762	Protein of unknown function (DUF1666)	-1.307
Gh_A10G2237	-1.329	-1.161	Protein of unknown function (DUF1677)	-1.297
Gh_D10G0934	-1.125	-2.036	Protein of unknown function (DUF1685)	-1.462
Gh_D11G3464	-1.381	-2.335	Protein of unknown function (DUF1685)	-1.896
Gh_A11G3109	-2.723	-2.662	Protein of unknown function (DUF1685)	-4.411
Gh_D07G0031	-2.905	-2.368	Protein of unknown function (DUF2921)	-4.942
Gh_A02G0415	-1.083	-1.525	Protein of unknown function (DUF3527)	-1.31
Gh_A08G1639	-1.866	-1.626	Protein of unknown function (DUF3741)	-2.669
Gh_D10G0238	-1.424	-2.317	Protein of unknown function (DUF506)	-1.689
Gh_Sca006201G01	-1.298	-2.842	Protein of unknown function (DUF506)	-1.254
Gh_D12G1396	-1.964	-3.526	Protein of unknown function (DUF506)	-2.521
Gh_A12G1274	-2.088	-4.007	Protein of unknown function (DUF506)	-2.177
Gh_D09G0706	-3.607	-5.548	Protein of unknown function (DUF506)	-3.589
Gh_Sca005409G01	-3.589	-5.953	Protein of unknown function (DUF506)	-3.814
Gh_A09G0888	-1.307	-1.383	Protein of unknown function (DUF567)	-1.758
Gh_D08G1944	-1.115	-1.939	Protein of unknown function (DUF567)	-1.088
Gh_D09G0912	-1.646	-2.122	Protein of unknown function (DUF567)	-2.696
Gh_D08G0609	-1.307	-1.266	Protein of unknown function (DUF581)	-1.074
Gh_D11G0787	-1.591	-1.348	Protein of unknown function (DUF581)	-1.377
Gh_D05G1062	-1.31	-1.307	Protein of unknown function (DUF640)	-1.379
Gh_A12G1017	-1.35	-2.269	Protein of unknown function (DUF688)	-1.369
Gh_D12G1136	-2.045	-2.823	Protein of unknown function (DUF688)	-1.994
Gh_A11G1023	-1.344	-1.16	Protein of unknown function (DUF789)	-1.246
Gh_D11G2912	-1.63	-1.987	Protein of unknown function, DUF538	-2.123
Gh_A01G1989	-2.538	-3.117	Protein of unknown function, DUF538	-4.086
Gh_D06G0117	-1.241	-1.116	Protein of unknown function, DUF547	-1.407
Gh_D09G0670	-1.728	-1.328	Protein of unknown function, DUF584	-1.425
Gh_D12G2718	-1.852	-1.787	Protein of unknown function, DUF599	-2.156
Gh_A07G2099	-1.59	-1.598	Protein of unknown function, DUF642	-1.338
Gh_D07G2313	-2.497	-2.541	Protein of unknown function, DUF642	-3.054
Gh_D11G2776	-1.519	-1.135	Protein phosphatase 2C family protein	-1.131
Gh_A11G2459	-1.889	-1.298	Protein phosphatase 2C family protein	-1.739
Gh_A04G0881	-1.405	-1.435	Protein phosphatase 2C family protein	-1.873
Gh_A06G1270	-1.215	-1.166	protein serine/threonine kinases;protein kinases;ATP binding;sugar binding;kinases;carbohydrate binding	-1.287
Gh_A06G1784	-1.536	-2.839	protein serine/threonine kinases;protein kinases;ATP binding;sugar binding;kinases;carbohydrate binding	-1.172
Gh_D01G0549	-2.337	-3.271	protein serine/threonine kinases;protein kinases;ATP binding;sugar binding;kinases;carbohydrate binding	-3.817
Gh_D05G1603	-3.663	-3.475	protein serine/threonine kinases;protein kinases;ATP binding;sugar binding;kinases;carbohydrate binding	-6.695
Gh_A01G2077	-2.016	-2.837	purine permease 3	-6.276
Gh_A02G1579	-1.611	-1.651	Putative methyltransferase family protein	-1.852
Gh_D03G0144	-2.169	-1.945	Putative methyltransferase family protein	-2.021
Gh_A01G1990	-1.832	-1.846	PYR1-like 4	-2.598
Gh_D01G2250	-2.485	-2.595	PYR1-like 4	-2.679
Gh_A09G2421	-2.656	-2.827	PYR1-like 4	-3.018
Gh_D09G1585	-3.157	-3.166	PYR1-like 4	-2.985
Gh_D05G2920	-4.842	-4.614	PYR1-like 4	-5.189
Gh_A05G2630	-6.183	-6.652	PYR1-like 4	-7.994
Gh_A10G2142	-1.808	-1.434	PYR1-like 6	-2.641
Gh_A06G1418	-3.852	-3.835	PYR1-like 6	-4.332
Gh_D06G1764	-7.704	-7.343	PYR1-like 6	-7.202
Gh_D11G2838	-1.048	-1.813	Pyridoxal phosphate (PLP)-dependent transferases superfamily protein	-1.576
Gh_D13G1067	-2.111	-1.224	Pyruvate kinase family protein	-1.334
Gh_D11G1046	-1.673	-1.125	RAB GTPase homolog A3	-1.805
Gh_A05G0160	-1.281	-1.437	RAB homolog 1	-1.283
Gh_Sca006742G01	-1.631	-1.179	RAC-like 2	-1.962
Gh_D11G1207	-1.852	-1.797	ralf-like 33	-2.212
Gh_A11G1052	-1.864	-2.137	ralf-like 33	-2.781
Gh_A04G0939	-1.049	-1.985	receptor like protein 15	-1.778
Gh_D02G1153	-2.499	-3.665	related to ABI3/VP1 1	-2.456
Gh_D05G1963	-1.08	-1.063	related to AP2 1	-1.526
Gh_D11G0923	-1.865	-1.103	Remorin family protein	-1.897
Gh_A12G2610	-1.397	-1.245	Remorin family protein	-1.432
Gh_A11G0792	-1.397	-1.329	Remorin family protein	-2.219
Gh_D08G0530	-1.055	-1.013	Rhodanese/Cell cycle control phosphatase superfamily protein	-1.281
Gh_A11G0394	-1.413	-2.272	Rhodanese/Cell cycle control phosphatase superfamily protein	-1.281
Gh_D13G1280	-1.538	-3.053	Rhodanese/Cell cycle control phosphatase superfamily protein	-2.278
Gh_A12G0538	-2.339	-5.189	Rhodanese/Cell cycle control phosphatase superfamily protein	-1.815
Gh_D12G0554	-4.224	-7.559	Rhodanese/Cell cycle control phosphatase superfamily protein	-3.859
Gh_A05G0830	-1.368	-1.241	Ribosomal protein S8 family protein	-1.077
Gh_D03G1402	-3.23	-2.545	Ribulose bisphosphate carboxylase (small chain) family protein	-2.526
Gh_D10G0229	-2.025	-1.765	RING membrane-anchor 1	-1.01
Gh_A06G0015	-1.008	-1.125	RING/U-box superfamily protein	-1.087
Gh_D06G1777	-2.032	-1.267	RING/U-box superfamily protein	-1.081
Gh_A01G0302	-1.945	-1.457	RING/U-box superfamily protein	-2.236
Gh_D07G0079	-1.018	-1.581	RING/U-box superfamily protein	-1.656
Gh_A01G1587	-2.264	-1.748	RING/U-box superfamily protein	-2.069
Gh_A05G0277	-1.582	-2.024	RING/U-box superfamily protein	-1.752
Gh_D06G0303	-1.161	-1.044	RNA-binding (RRM/RBD/RNP motifs) family protein	-2.177
Gh_A08G0921	-1.146	-1.73	RNA-binding (RRM/RBD/RNP motifs) family protein	-1.283
Gh_A07G1145	-1.583	-1.059	root hair specific 13	-1.744
Gh_D05G0807	-1.131	-1.187	root hair specific 18	-1.595
Gh_A08G1738	-1.056	-1.069	RPM1 interacting protein 4	-1.18
Gh_D08G2088	-1.064	-1.133	RPM1 interacting protein 4	-1.335
Gh_A11G0774	-1.772	-1.224	S-adenosyl-L-methionine-dependent methyltransferases superfamily protein	-1.709
Gh_D06G0889	-1.437	-1.671	S-adenosyl-L-methionine-dependent methyltransferases superfamily protein	-1.081
Gh_A06G0743	-1.6	-1.883	S-adenosyl-L-methionine-dependent methyltransferases superfamily protein	-1.54
Gh_D05G1800	-1.362	-1.675	salt tolerance homolog2	-1.679
Gh_A10G1322	-1.374	-2.365	saposin B domain-containing protein	-2.331
Gh_D02G2213	-2.9	-1.997	SAUR-like auxin-responsive protein family	-4.223
Gh_A12G1686	-3.392	-5.262	seed imbibition 1	-1.806
Gh_D12G1848	-2.258	-3.833	seed imbibition 2	-2.005
Gh_A12G1687	-3.597	-5.812	seed imbibition 2	-2.939
Gh_A06G1407	-1.937	-1.193	senescence associated gene 20	-1.87
Gh_D04G1360	-3.444	-2.809	senescence-associated gene 29	-6.979
Gh_A05G3216	-2.504	-2.088	serine carboxypeptidase-like 25	-2.362
Gh_D11G0414	-1.572	-1.377	serine carboxypeptidase-like 45	-1.393
Gh_A09G2482	-1.484	-1.451	serine carboxypeptidase-like 51	-1.31
Gh_A11G1179	-3.024	-3.854	Serine protease inhibitor, potato inhibitor I-type family protein	-2.89
Gh_A13G0144	-1.401	-1.069	SGNH hydrolase-type esterase superfamily protein	-1.055
Gh_D12G0344	-2.328	-1.873	SKU5 similar 5	-2.54
Gh_D06G1648	-2.078	-2.976	SLAC1 homologue 1	-3.014
Gh_D06G2353	-3.431	-3.731	somatic embryogenesis receptor-like kinase 1	-2.576
Gh_D12G2756	-4.863	-6.543	SPIRAL1-like5	-7.444
Gh_D05G3653	-1.742	-2.591	Stabilizer of iron transporter SufD / Polynucleotidyl transferase	-2.362
Gh_A05G1971	-1.322	-1.578	STAS domain / Sulfate transporter family	-1.871
Gh_A08G1601	-6.083	-5.007	subtilase 4.12	-6.074
Gh_D12G2367	-1.029	-1.452	Subtilase family protein	-1.335
Gh_D03G0815	-1.975	-1.72	Subtilase family protein	-1.261
Gh_A12G0941	-2.075	-2.293	subtilase family protein	-2.396
Gh_D12G1031	-1.893	-2.648	subtilase family protein	-3.09
Gh_D12G1029	-2.69	-3.549	subtilase family protein	-3.235
Gh_A07G1757	-1.591	-1.403	Subtilisin-like serine endopeptidase family protein	-1.023
Gh_D05G0363	-1.217	-1.391	sucrose synthase 4	-1.381
Gh_D02G2392	-3.091	-2.961	sucrose-proton symporter 2	-3.216
Gh_A02G0626	-3.372	-3.786	sucrose-proton symporter 2	-3.601
Gh_D05G1581	-1.033	-1.018	sugar transporter 1	-1.008
Gh_D10G0190	-1.387	-1.674	sugar transporter 1	-1.837
Gh_A05G1416	-1.562	-1.692	sugar transporter 1	-1.461
Gh_A10G0210	-2.416	-3.104	sugar transporter 1	-3.898
Gh_A12G0022	-1.827	-2.212	sulfate transporter 3;1	-2.335
Gh_D12G0026	-2.938	-3.462	sulfate transporter 3;1	-3.526
Gh_A05G0386	-1.444	-1.804	Sulfite exporter TauE/SafE family protein	-1.252
Gh_A04G0761	-1.072	-1.254	sulfoquinovosyldiacylglycerol 2	-1.158
Gh_D03G0378	-1.277	-1.39	sulfotransferase 16	-1.302
Gh_D03G0383	-2.343	-2.816	sulfotransferase 16	-4.447
Gh_D03G0384	-2.237	-3.299	sulfotransferase 16	-3.3
Gh_D11G2357	-1.091	-1.284	sulfotransferase 2A	-1.252
Gh_D04G1950	-1.202	-1.786	sulfotransferase 2A	-1.705
Gh_A11G0076	-1.482	-1.599	sulfotransferase 4A	-1.721
Gh_D06G0740	-3.429	-2.113	Survival protein SurE-like phosphatase/nucleotidase	-2.025
Gh_A09G0258	-1.702	-1.098	Tetratricopeptide repeat (TPR)-like superfamily protein	-1.951
Gh_D11G0457	-2.588	-3.154	thaumatin superfamily protein	-1.98
Gh_A11G0393	-2.276	-4.032	thaumatin superfamily protein	-1.784
Gh_A05G1594	-1.555	-1.492	Thaumatin-like protein 1	-1.556
Gh_D04G0277	-1.515	-2.809	Thiamin diphosphate-binding fold (THDP-binding) superfamily protein	-1.47
Gh_A05G3323	-1.666	-2.992	Thiamin diphosphate-binding fold (THDP-binding) superfamily protein	-2.206
Gh_D02G0660	-1.087	-1.094	Thioesterase superfamily protein	-1.186
Gh_A02G0603	-1.03	-1.271	Thioesterase superfamily protein	-1.072
Gh_D13G2394	-1.804	-1.091	tonoplast intrinsic protein 1;3	-1.642
Gh_A05G1638	-2.025	-2.126	TRAM, LAG1 and CLN8 (TLC) lipid-sensing domain containing protein	-2.771
Gh_D01G1566	-2.083	-2.519	Transducin/WD40 repeat-like superfamily protein	-3.105
Gh_A01G1303	-4.225	-4.418	Transducin/WD40 repeat-like superfamily protein	-4.921
Gh_D01G2251	-2.068	-2.379	TRICHOME BIREFRINGENCE-LIKE 34	-2.838
Gh_D10G0293	-2.038	-1.183	TRICHOME BIREFRINGENCE-LIKE 38	-2.035
Gh_D06G2148	-1.963	-1.212	TRICHOME BIREFRINGENCE-LIKE 38	-1.766
Gh_D05G3289	-1.035	-1.185	Ubiquitin domain-containing protein	-1.047
Gh_D08G1510	-1.358	-2.43	Ubiquitin-like superfamily protein	-1.584
Gh_A08G1623	-1.483	-2.201	UDP-D-glucose/UDP-D-galactose 4-epimerase 1	-1.475
Gh_D08G1936	-1.862	-2.723	UDP-D-glucose/UDP-D-galactose 4-epimerase 1	-1.085
Gh_D02G0251	-1.205	-1.722	UDP-D-glucuronate 4-epimerase 6	-1.22
Gh_A07G0920	-4.044	-3.478	UDP-glucosyl transferase 76E2	-5.034
Gh_D07G0996	-4.329	-3.774	UDP-glucosyl transferase 76E2	-4.569
Gh_A12G0965	-1.669	-1.186	UDP-Glycosyltransferase superfamily protein	-1.675
Gh_D12G1077	-2.168	-1.418	UDP-Glycosyltransferase superfamily protein	-1.669
Gh_A12G2646	-1.649	-1.507	UDP-Glycosyltransferase superfamily protein	-1.835
Gh_D07G1002	-1.965	-5.756	UDP-Glycosyltransferase superfamily protein	-3.325
Gh_A10G1937	-1.57	-1.054	UDP-XYL synthase 6	-1.408
Gh_Sca004851G03	-1.386	-1.067	UDP-XYL synthase 6	-1.358
Gh_D06G0754	-4.538	-4.371	Uncharacterized membrane protein	-2.649
Gh_D13G0851	-1.102	-1.078	ureide permease 1	-1.683
Gh_A04G0955	-1.338	-2.594	Vacuolar iron transporter (VIT) family protein	-1.772
Gh_D04G1498	-2.561	-3.907	Vacuolar iron transporter (VIT) family protein	-1.611
Gh_A05G0072	-1.441	-1.711	vesicle-associated membrane protein 711	-1.597
Gh_D05G0571	-1.42	-1.737	vesicle-associated membrane protein 711	-2.344
Gh_A09G0180	-1.381	-2.031	Wall-associated kinase family protein	-2.218
Gh_A12G2378	-1.832	-1.181	Wound-responsive family protein	-1.629
Gh_D06G2344	-2.644	-4.874	Wound-responsive family protein	-3.766
Gh_D12G1614	-2.825	-2.033	WRKY DNA-binding protein 57	-5.245
Gh_D12G1734	-2.12	-3.731	WRKY DNA-binding protein 61	-3.859
Gh_A13G0630	-5.004	-7.133	WRKY DNA-binding protein 72	-7.573
Gh_A11G0757	-1.563	-2.403	xylem serine peptidase 1	-2.855
Gh_A02G1729	-1.809	-1.693	xyloglucan endotransglucosylase/hydrolase 16	-2.653
Gh_D02G0220	-2.836	-2.415	xyloglucan endotransglucosylase/hydrolase 16	-3.674
Gh_A11G1910	-2.561	-4.301	xyloglucan endotransglucosylase/hydrolase 6	-5.659
Gh_A02G1426	-4.727	-4.708	xyloglucan endotransglucosylase/hydrolase 6	-5.917
Gh_A03G1432	-1.179	-1.018	xyloglucan endotransglucosylase/hydrolase 9	-1.327
Gh_D13G0639	-2.539	-3.195	xyloglucan endotransglucosylase/hydrolase 9	-2.704
Gh_A13G0500	-1.946	-3.216	xyloglucan endotransglucosylase/hydrolase 9	-2.682
Gh_D08G0272	-2.263	-2.19	Xyloglucan endotransglucosylase/hydrolase family protein	-3.279
Gh_A08G0195	-1.877	-1.356	xyloglucan endotransglycosylase 6	-2.621
Gh_D03G1327	-1.318	-1.054	xyloglucan endo-transglycosylase-related 8	-1.393
Gh_A07G1955	-1.402	-1.147	Ypt/Rab-GAP domain of gyp1p superfamily protein	-1.061
Gh_A01G0562	-1.506	-1.607	zinc finger protein-related	-1.502
Gh_D01G0570	-1.083	-1.626	zinc finger protein-related	-2.042
Gh_A01G0801	-1.427	-1.429	zinc transporter 1 precursor	-1.302
Gh_A01G0872	-1.264	-1.168	Zinc-binding alcohol dehydrogenase family protein	-1.05
Gh_D01G0907	-1.638	-1.417	Zinc-binding alcohol dehydrogenase family protein	-1.715
Gh_D05G3116	-1.418	-2.456	Major facilitator superfamily protein	1.276
Gh_A12G1913	-1.172	-1.082	2-oxoglutarate (2OG) and Fe(II)-dependent oxygenase superfamily protein	NS
Gh_A12G0593	-1.303	-1.942	4-phosphopantetheine adenylyltransferase	NS
Gh_A08G0825	-1.007	-1.606	AFG1-like ATPase family protein	NS
Gh_D11G0268	-2.268	-3.475	alpha/beta-Hydrolases superfamily protein	NS
Gh_A11G1043	-1.364	-1.358	alpha/beta-Hydrolases superfamily protein	NS
Gh_A02G0276	-1.069	-1.026	alpha/beta-Hydrolases superfamily protein	NS
Gh_A05G3566	-1.381	-1.174	Armadillo/beta-catenin repeat family protein / kinesin motor family protein	NS
Gh_D08G0665	-1.606	-1.546	AUX/IAA transcriptional regulator family protein	NS
Gh_D07G0403	-1.08	-1.085	basic helix-loop-helix (bHLH) DNA-binding superfamily protein	NS
Gh_D11G1147	-1.114	-1.212	basic region/leucine zipper motif 53	NS
Gh_D04G1297	-1.098	-1.016	BCL-2-associated athanogene 4	NS
Gh_D11G1293	-1.012	-1.049	Bifunctional inhibitor/lipid-transfer protein/seed storage 2S albumin superfamily protein	NS
Gh_D12G2332	-1.419	-1.055	BTB/POZ domain-containing protein	NS
Gh_A11G0955	-1.559	-1.02	Chitinase family protein	NS
Gh_A11G0260	-5.719	-8.434	chloroplast beta-amylase	NS
Gh_A10G2270	-1.041	-1.066	CHY-type/CTCHY-type/RING-type Zinc finger protein	NS
Gh_A03G0492	-1.475	-2.568	Copper amine oxidase family protein	NS
Gh_D03G1043	-1.384	-1.641	Copper amine oxidase family protein	NS
Gh_D05G2691	-1.342	-1.217	CP12 domain-containing protein 3	NS
Gh_D04G0931	-1.515	-1.194	cytochrome oxidase	NS
Gh_D01G1930	-2.286	-2.948	cytochrome P450, family 98, subfamily A, polypeptide 3	NS
Gh_A06G1685	-1.227	-1.48	Disease resistance protein (CC-NBS-LRR class) family	NS
Gh_D13G2122	-1.672	-1.402	DnaJ/Hsp40 cysteine-rich domain superfamily protein	NS
Gh_A05G2241	-1.216	-1.029	Domain of unknown function (DUF303)	NS
Gh_D02G1190	-1.182	-1.145	Endosomal targeting BRO1-like domain-containing protein	NS
Gh_D09G2285	-1.459	-1.109	ethylene-responsive element binding protein	NS
Gh_A11G3199	-1.243	-1.686	exocyst complex component sec3A	NS
Gh_A06G1604	-1.044	-1.192	FAD-binding Berberine family protein	NS
Gh_A09G1038	-1.247	-2.013	F-box family protein	NS
Gh_A12G1368	-3.295	-4.715	Galactose oxidase/kelch repeat superfamily protein	NS
Gh_D02G0959	-1.77	-1.675	G-box binding factor 6	NS
Gh_A04G0465	-1.799	-1.945	Glutaredoxin family protein	NS
Gh_D06G2208	-1.433	-1.582	glyoxalase I homolog	NS
Gh_A09G0377	-1.028	-1.197	GroES-like zinc-binding alcohol dehydrogenase family protein	NS
Gh_A02G0020	-1.634	-1.965	HAD superfamily, subfamily IIIB acid phosphatase	NS
Gh_A07G1285	-1.039	-1.15	Heavy metal transport/detoxification superfamily protein	NS
Gh_A11G3156	-1.095	-1.153	Homeobox-leucine zipper protein family	NS
Gh_D11G1364	-1.148	-1.055	Immunoglobulin E-set superfamily protein	NS
Gh_A05G2151	-3.368	-4	Integrase-type DNA-binding superfamily protein	NS
Gh_D11G1852	-1.196	-1.317	Major facilitator superfamily protein	NS
Gh_A11G2371	-1.035	-1.04	Major facilitator superfamily protein	NS
Gh_D07G1410	-1.143	-1.066	MAP kinase 4	NS
Gh_D06G0667	-2.254	-1.279	MATE efflux family protein	NS
Gh_D05G1913	-2.028	-1.85	myb domain protein 4r1	NS
Gh_D08G1815	-1.061	-1.067	myb domain protein 4r1	NS
Gh_D07G0301	-3.645	-5.29	N/A	NS
Gh_A07G2117	-2.112	-4.287	N/A	NS
Gh_D07G0948	-2.608	-3.405	N/A	NS
Gh_A10G0688	-1.255	-2.505	N/A	NS
Gh_D07G0997	-1.567	-2.328	N/A	NS
Gh_A07G0655	-1.359	-2.257	N/A	NS
Gh_A11G1735	-2.131	-2.107	N/A	NS
Gh_D11G1894	-2.226	-1.906	N/A	NS
Gh_D02G2017	-1.427	-1.863	N/A	NS
Gh_D08G1741	-1.214	-1.773	N/A	NS
Gh_D03G0421	-1.328	-1.771	N/A	NS
Gh_D10G0330	-1.211	-1.742	N/A	NS
Gh_A07G1419	-2.005	-1.679	N/A	NS
Gh_A11G0941	-1.259	-1.673	N/A	NS
Gh_A06G0592	-1.139	-1.645	N/A	NS
Gh_D12G0644	-1.763	-1.607	N/A	NS
Gh_D05G0149	-1.053	-1.399	N/A	NS
Gh_A06G0664	-1.119	-1.33	N/A	NS
Gh_D08G1408	-1.015	-1.285	N/A	NS
Gh_A02G0668	-1.162	-1.199	N/A	NS
Gh_A07G0036	-1.135	-1.191	N/A	NS
Gh_D01G1143	-1.071	-1.14	N/A	NS
Gh_A11G1591	-1.024	-1.103	N/A	NS
Gh_D06G0322	-1.296	-1.102	N/A	NS
Gh_Sca116205G01	-1.808	-1.095	N/A	NS
Gh_D02G0714	-1.408	-1.068	N/A	NS
Gh_D05G1372	-1.074	-1.008	N/A	NS
Gh_A10G0627	-1.03	-1.057	NAC domain containing protein 83	NS
Gh_D07G0734	-1.476	-1.018	NAD(P)-binding Rossmann-fold superfamily protein	NS
Gh_D03G1011	-1.76	-2.134	NAD(P)-linked oxidoreductase superfamily protein	NS
Gh_D03G1623	-1.876	-2.108	nitrate transporter 1.5	NS
Gh_A05G3754	-2.564	-5.102	nodulin MtN21 /EamA-like transporter family protein	NS
Gh_A11G3026	-1.085	-2.264	nodulin MtN21 /EamA-like transporter family protein	NS
Gh_A05G1435	-1.139	-1.146	NTF2-like	NS
Gh_A11G0134	-1.238	-1.757	oligopeptide transporter 1	NS
Gh_A03G1391	-1.015	-1.307	O-methyltransferase family protein	NS
Gh_D07G0552	-1.097	-1.396	peptidemethionine sulfoxide reductase 1	NS
Gh_A07G0012	-1.476	-1.071	Peroxidase family protein	NS
Gh_D09G1420	-1.133	-2.417	Peroxidase superfamily protein	NS
Gh_D10G2064	-1.735	-2.122	Phosphorylase superfamily protein	NS
Gh_A08G0609	-2.363	-1.838	photosystem I subunit D-2	NS
Gh_D08G2080	-1.288	-1.025	Phototropic-responsive NPH3 family protein	NS
Gh_A05G0266	-1.118	-1.25	Plant invertase/pectin methylesterase inhibitor superfamily protein	NS
Gh_A10G1648	-1.34	-1.63	Protein kinase superfamily protein	NS
Gh_D02G0951	-1.01	-1.207	Protein kinase superfamily protein	NS
Gh_Sca005670G01	-1.197	-2.638	Protein of unknown function (DUF1068)	NS
Gh_Sca006021G01	-1.694	-1.608	Protein of unknown function (DUF1068)	NS
Gh_D10G0526	-1.258	-1.317	Protein of unknown function (DUF1677)	NS
Gh_D04G0081	-1.506	-1.39	Protein of unknown function (DUF3511)	NS
Gh_A12G0826	-1.152	-1.175	Protein of unknown function (DUF688)	NS
Gh_D11G2759	-1.604	-1.549	Protein of unknown function, DUF538	NS
Gh_D10G0156	-1.805	-3.911	protein serine/threonine kinases;protein kinases;ATP binding;sugar binding;kinases;carbohydrate binding	NS
Gh_A13G0731	-1.005	-1.154	Purple acid phosphatases superfamily protein	NS
Gh_D10G0577	-1.455	-1.39	Pyridoxal phosphate phosphatase-related protein	NS
Gh_D01G1268	-1.629	-1.36	RAB GTPase homolog C2A	NS
Gh_A05G0110	-2.921	-2.808	Ran BP2/NZF zinc finger-like superfamily protein	NS
Gh_D12G1060	-1.07	-1.116	Remorin family protein	NS
Gh_D07G2412	-2.124	-2.076	Reticulon family protein	NS
Gh_A10G0721	-1.331	-1.291	RHO guanyl-nucleotide exchange factor 12	NS
Gh_A05G1872	-8.299	-6.723	ribosomal protein 5B	NS
Gh_D10G1209	-1.113	-1.425	RING/FYVE/PHD zinc finger superfamily protein	NS
Gh_D10G1153	-1.175	-1.117	saposin B domain-containing protein	NS
Gh_A06G1984	-1.505	-1.073	SBP (S-ribonuclease binding protein) family protein	NS
Gh_A13G1088	-1.148	-2.306	seed imbibition 1	NS
Gh_D02G0243	-1.607	-2.068	selenium-binding protein 2	NS
Gh_A05G3466	-1.045	-1.246	sequence-specific DNA binding transcription factors	NS
Gh_D06G0583	-1.201	-1.353	serine-rich protein-related	NS
Gh_A10G0286	-1.228	-1.66	SGNH hydrolase-type esterase superfamily protein	NS
Gh_D08G1273	-1.458	-1.207	SPIRAL1-like5	NS
Gh_D12G1030	-1.251	-1.173	subtilase family protein	NS
Gh_A07G0525	-1.155	-1.035	sulphotransferase 12	NS
Gh_D07G0639	-1.01	-1.397	TEOSINTE BRANCHED, cycloidea and PCF (TCP) 14	NS
Gh_D06G1003	-1.879	-1.539	Tetraspanin family protein	NS
Gh_A07G1464	-1.517	-1.641	Tetratricopeptide repeat (TPR)-like superfamily protein	NS
Gh_D06G1748	-1.048	-1.225	Transmembrane amino acid transporter family protein	NS
Gh_D04G0442	-1.896	-2.065	Transmembrane amino acid transporter family protein	NS
Gh_A01G0747	-1.08	-1.603	uridine kinase-like 4	NS
Gh_A09G1293	-1.087	-1.103	uridine-ribohydrolase 1	NS
Gh_D01G1277	-2.102	-1.271	xyloglucan endotransglucosylase/hydrolase 32	NS
Gh_A03G0243	-2.704	-1.868	xyloglucan endo-transglycosylase-related 8	NS
Gh_D03G1102	-1.329	-1.857	Yippee family putative zinc-binding protein	NS
