# Supplementary material for: Comparative Transcriptomics Reveal Metabolic Rather than Genetic Control of Divergent Antioxidant Metabolism in the Primary Root Elongation Zone of Water-Stressed Cotton and Maize
Source: Antioxidants (Basel). 2023 Jan 27;12(2):287. doi: 10.3390/antiox12020287 (PMC9952253; doi:10.3390/antiox12020287)
Supplement: Supplementary file 1 [file antioxidants-12-00287-s001.zip › Table S2.xlsx]

## Sheet: Table S2
Supplemental Table S2. Ratios of transcript abundance in each comparison of DATs that significantly changed in maize primary roots in response to water-deficit stress.DATs have to be significantly increased or decreased in comparisons of WS48/WW24 and WS48/WW48 to be included. Yellow cells indicate the abundance was increased in the water-stressed treatment. Blue cells indicate the abundance was …
Maize ID	WS48/WW24log2FC	WS48/WW48log2FC	Function	WS24/WW24log2FC
Zm00001d039566	5.699	4.746	17.6 kDa class II heat shock protein	6.192
Zm00001d021360	1.441	1.553	2 iron, 2 sulfur cluster binding	1.833
Zm00001d049926	3.466	2.697	2-oxoglutarate (2OG) and Fe(II)-dependent oxygenase superfamily protein	3.852
Zm00001d029391	3.798	2.876	3-deoxy-D-arabino-heptulosonate 7-phosphate synthase 1	3.551
Zm00001d028406	1.22	1.775	3-ketoacyl-CoA synthase 1	2.672
Zm00001d014168	3.21	3.149	3-ketoacyl-CoA synthase 11	4.005
Zm00001d048953	4.922	3.735	3-ketoacyl-CoA synthase 2	6.424
Zm00001d037328	8.114	8.151	3-ketoacyl-CoA synthase 6	9.871
Zm00001d028241	9.286	6.888	3-ketoacyl-CoA synthase 6	10.419
Zm00001d018847	2.736	1.366	3-oxo-5-alpha-steroid 4-dehydrogenase family protein	2.902
Zm00001d009472	1.857	2.091	5\'-3\' exoribonuclease 3	1.915
Zm00001d004534	3.327	4.121	AAA-ATPase 1	3.469
Zm00001d049905	1.164	1.555	ABC transporter family protein	1.347
Zm00001d028689	6.569	6.607	ABC-2 type transporter family protein	8.057
Zm00001d012438	6.191	6.203	ABC-2 type transporter family protein	8.376
Zm00001d042953	4.83	5.384	ABC-2 type transporter family protein	6.548
Zm00001d044476	6.569	4.242	ABC-2 type transporter family protein	8.416
Zm00001d038068	3.384	2.508	ABC-2 type transporter family protein	4.907
Zm00001d022069	1.405	1.425	ABI five binding protein 3	1.749
Zm00001d037170	2.695	2.847	abscisic acid responsive elements-binding factor 2	3.524
Zm00001d044940	2.065	2.244	abscisic acid responsive elements-binding factor 2	2.785
Zm00001d031790	1.833	1.751	abscisic acid responsive elements-binding factor 2	2.037
Zm00001d050018	1.411	1.42	abscisic acid responsive elements-binding factor 2	1.513
Zm00001d020711	2.129	1.785	abscisic acid responsive elements-binding factor 2	2.64
Zm00001d043348	1.367	1.392	Acetamidase/Formamidase family protein	1.398
Zm00001d006476	6.171	7.634	aconitase 3	7.275
Zm00001d029656	1.452	1.483	actin depolymerizing factor 6	2.274
Zm00001d001849	2.026	1.396	acyl activating enzyme 5	2.695
Zm00001d048407	1.274	1.358	Acyl-CoA N-acyltransferases (NAT) superfamily protein	1.406
Zm00001d045606	1.204	1.436	acyl-CoA oxidase 1	1.373
Zm00001d045669	1.488	1.692	acylphosphatase family	1.327
Zm00001d051584	1.491	1.513	Adenine nucleotide alpha hydrolases-like superfamily protein	1.82
Zm00001d023737	1.033	1.467	Adenine nucleotide alpha hydrolases-like superfamily protein	1.346
Zm00001d033169	1.248	1.382	Adenine nucleotide alpha hydrolases-like superfamily protein	1.504
Zm00001d043912	1.374	1.309	Adenine nucleotide alpha hydrolases-like superfamily protein	2.016
Zm00001d003108	1.74	1.837	adenine phosphoribosyl transferase 2	1.711
Zm00001d003017	1.84	1.952	adenosine kinase 2	1.969
Zm00001d048785	2.333	1.843	adenosine-5\'-phosphosulfate (APS) kinase 3	2.887
Zm00001d035053	2.954	2.09	AGAMOUS-like 12	3.144
Zm00001d032218	3.604	4.841	AGAMOUS-like 15	3.485
Zm00001d032219	2.699	3.018	AGAMOUS-like 16	2.424
Zm00001d020927	1.382	1.602	AGC (cAMP-dependent, cGMP-dependent and protein kinase C) kinase family protein	1.887
Zm00001d030557	1.733	1.686	alanine aminotransferase 2	1.698
Zm00001d007937	1.351	1.127	alanine-2-oxoglutarate aminotransferase 2	1.683
Zm00001d050428	1.948	1.292	aldehyde dehydrogenase 11A3	2.084
Zm00001d017418	1.886	1.606	aldehyde dehydrogenase 3F1	1.683
Zm00001d015406	1.843	1.791	aldehyde dehydrogenase 5F1	2.265
Zm00001d015404	1.885	1.553	aldehyde dehydrogenase 5F1	2.477
Zm00001d015405	1.703	1.525	aldehyde dehydrogenase 5F1	2.218
Zm00001d020008	1.388	3.06	Aldolase-type TIM barrel family protein	1.972
Zm00001d038469	2.16	3.81	allergen-related	2.202
Zm00001d017785	5.002	4.565	alpha/beta-Hydrolases superfamily protein	6.067
Zm00001d013406	4.291	4.252	alpha/beta-Hydrolases superfamily protein	4.505
Zm00001d029715	3.106	2.572	alpha/beta-Hydrolases superfamily protein	4.912
Zm00001d028440	1.889	1.836	alpha/beta-Hydrolases superfamily protein	1.757
Zm00001d003800	1.288	1.735	alpha/beta-Hydrolases superfamily protein	1.838
Zm00001d021490	1.844	1.379	alpha/beta-Hydrolases superfamily protein	1.957
Zm00001d032036	1.638	1.042	alpha/beta-Hydrolases superfamily protein	1.83
Zm00001d043662	1.874	1.543	alpha-amylase-like 3	1.886
Zm00001d032608	6.575	7.22	alpha-galactosidase 1	7.2
Zm00001d039994	2.253	2.176	alpha-xylosidase 1	2.629
Zm00001d004705	6.537	5.832	amino acid permease 2	7.412
Zm00001d053143	3.452	3.138	amino acid permease 2	3.78
Zm00001d023593	1.503	1.222	amino acid permease 2	1.93
Zm00001d025665	3.428	4.326	amino acid permease 7	3.688
Zm00001d042636	1.809	1.714	amino acid permease 8	1.423
Zm00001d029314	1.738	1.399	Amino acid permease family protein	1.628
Zm00001d034713	1.849	2.267	anthranilate synthase 2	1.803
Zm00001d011745	1.466	1.705	AP2/B3-like transcriptional factor family protein	1.602
Zm00001d049094	1.235	1.289	AP2/B3-like transcriptional factor family protein	1.103
Zm00001d017112	1.103	1.19	AP2/B3-like transcriptional factor family protein	1.608
Zm00001d025933	1.314	1.676	Arabidopsis thaliana protein of unknown function (DUF821)	1.267
Zm00001d045470	1.086	1.154	arginine decarboxylase 2	1.375
Zm00001d012146	2.253	1.551	ARM repeat superfamily protein	2.121
Zm00001d029179	1.084	1.203	Aspartate kinase family protein	1.392
Zm00001d053049	2.216	1.768	ATP-binding casette family G25	2.603
Zm00001d026253	2.145	2.029	autoinhibited Ca2+ -ATPase, isoform 8	2.687
Zm00001d006111	5.712	8.683	Auxin-responsive family protein	7.581
Zm00001d010697	2.041	2.335	Auxin-responsive GH3 family protein	2.246
Zm00001d034663	1.739	1.606	Barwin-like endoglucanases superfamily protein	2.218
Zm00001d036366	3.66	5.456	basic chitinase	4.455
Zm00001d027525	3.135	4.658	basic chitinase	3.859
Zm00001d036370	2.616	3.774	basic chitinase	3.693
Zm00001d020790	3.059	2.457	basic helix-loop-helix (bHLH) DNA-binding superfamily protein	3.345
Zm00001d003604	3.158	3.108	basic helix-loop-helix (bHLH) DNA-binding superfamily protein	3.531
Zm00001d028085	1.578	1.981	basic helix-loop-helix (bHLH) DNA-binding superfamily protein	2.794
Zm00001d016070	4.501	4.209	BCL-2-associated athanogene 6	5.511
Zm00001d038577	1.724	1.327	beta-1,3-glucanase 2	3.286
Zm00001d014083	7.645	6.968	beta-amylase 1	8.831
Zm00001d053225	1.759	3.849	beta-galactosidase 11	2.306
Zm00001d006243	2.999	3.056	beta-galactosidase 11	3.026
Zm00001d048469	1.811	2.516	beta-hydroxylase 1	2.109
Zm00001d027443	1.661	1.876	beta-hydroxylase 1	2.288
Zm00001d029190	2.062	1.701	beta-ketoacyl reductase 1	2.56
Zm00001d003757	5.614	6.702	Bifunctional inhibitor/lipid-transfer protein/seed storage 2S albumin superfamily protein	5.958
Zm00001d004614	6.791	6.562	Bifunctional inhibitor/lipid-transfer protein/seed storage 2S albumin superfamily protein	7.926
Zm00001d034416	5.322	5.87	Bifunctional inhibitor/lipid-transfer protein/seed storage 2S albumin superfamily protein	6.791
Zm00001d034415	7.678	5.723	Bifunctional inhibitor/lipid-transfer protein/seed storage 2S albumin superfamily protein	8.694
Zm00001d018926	5.606	5.19	Bifunctional inhibitor/lipid-transfer protein/seed storage 2S albumin superfamily protein	6.615
Zm00001d038913	5.439	4.239	Bifunctional inhibitor/lipid-transfer protein/seed storage 2S albumin superfamily protein	5.243
Zm00001d042862	5.767	4.191	Bifunctional inhibitor/lipid-transfer protein/seed storage 2S albumin superfamily protein	4.799
Zm00001d033595	4.49	3.785	Bifunctional inhibitor/lipid-transfer protein/seed storage 2S albumin superfamily protein	5.432
Zm00001d003760	3.535	3.307	Bifunctional inhibitor/lipid-transfer protein/seed storage 2S albumin superfamily protein	3.042
Zm00001d013598	2.095	2.879	Bifunctional inhibitor/lipid-transfer protein/seed storage 2S albumin superfamily protein	3.158
Zm00001d007832	3.705	2.699	Bifunctional inhibitor/lipid-transfer protein/seed storage 2S albumin superfamily protein	4.398
Zm00001d036452	2.399	2.677	Bifunctional inhibitor/lipid-transfer protein/seed storage 2S albumin superfamily protein	3.266
Zm00001d038911	3.728	2.312	Bifunctional inhibitor/lipid-transfer protein/seed storage 2S albumin superfamily protein	3.369
Zm00001d019100	2.114	1.621	Bifunctional inhibitor/lipid-transfer protein/seed storage 2S albumin superfamily protein	2.62
Zm00001d013089	2.884	1.578	Bifunctional inhibitor/lipid-transfer protein/seed storage 2S albumin superfamily protein	3.69
Zm00001d042777	1.908	1.316	bZIP transcription factor family protein	2.521
Zm00001d053006	1.701	1.744	C2H2-like zinc finger protein	2.254
Zm00001d014325	5.722	6.04	Calcium-binding EF-hand family protein	6.722
Zm00001d028428	2.514	1.976	Calcium-binding EF-hand family protein	2.653
Zm00001d036830	1.3	1.596	Calcium-dependent ARF-type GTPase activating protein family	1.554
Zm00001d051389	6.311	6.354	Calcium-dependent lipid-binding (CaLB domain) plant phosphoribosyltransferase family protein	7.592
Zm00001d028252	3.756	3.388	Caleosin-related family protein	3.568
Zm00001d027676	1.674	1.289	calmodulin-binding receptor-like cytoplasmic kinase 1	1.924
Zm00001d034195	1.251	1.386	calmodulin-like 41	1.336
Zm00001d018738	4.52	7.986	CAP (Cysteine-rich secretory proteins, Antigen 5, and Pathogenesis-related 1 protein) superfamily protein	5.909
Zm00001d019364	1.65	1.447	CAP (Cysteine-rich secretory proteins, Antigen 5, and Pathogenesis-related 1 protein) superfamily protein	1.001
Zm00001d018323	1.438	1.439	CAP (Cysteine-rich secretory proteins, Antigen 5, and Pathogenesis-related 1 protein) superfamily protein	1.134
Zm00001d032519	8.685	10.584	CAP160 protein	9.628
Zm00001d013900	6.012	6.423	CAP160 protein	6.302
Zm00001d013903	5.106	6.274	CAP160 protein	5.573
Zm00001d012313	4.959	5.21	Carbohydrate-binding-like fold	4.973
Zm00001d007258	4.217	4.225	carboxyesterase 18	4.687
Zm00001d053835	1.283	1.491	casein kinase I	1.462
Zm00001d014038	2.239	2.168	casein kinase I-like 6	1.981
Zm00001d054044	2.74	2.86	catalase 1	3.218
Zm00001d027511	2.847	2.408	catalase 2	4.75
Zm00001d025983	3.744	2.966	cationic amino acid transporter 7	3.601
Zm00001d005748	4.146	5.569	CBL-interacting protein kinase 5	4.591
Zm00001d003281	1.37	1.305	Cellulase (glycosyl hydrolase family 5) protein	1.857
Zm00001d052673	6.254	1.705	Chalcone and stilbene synthase family protein	4.37
Zm00001d012972	3.888	2.945	Chalcone-flavanone isomerase family protein	4.743
Zm00001d045036	2.349	2.347	Chaperone DnaJ-domain superfamily protein	2.287
Zm00001d013412	1.047	1.075	CHASE domain containing histidine kinase protein	1.232
Zm00001d013507	1.725	1.889	chloroplast heat shock protein 70-2	2.005
Zm00001d043613	1.158	1.227	CHY-type/CTCHY-type/RING-type Zinc finger protein	1.317
Zm00001d019669	4.167	2.97	cinnamoyl coa reductase 1	5.285
Zm00001d039364	3.692	4.068	Class I glutamine amidotransferase-like superfamily protein	4.602
Zm00001d026438	1.683	2.381	Coatomer epsilon subunit	1.885
Zm00001d039039	1.174	1.322	cold regulated 314 thylakoid membrane 2	1.203
Zm00001d017547	4.157	4.6	cold-regulated 47	4.765
Zm00001d024200	1.975	1.551	CONSTANS-like 4	2.414
Zm00001d015468	2.68	2.668	CONSTANS-like 5	2.687
Zm00001d051684	1.369	1.282	CONSTANS-like 9	1.499
Zm00001d008568	2.165	1.996	Core-2/I-branching beta-1,6-N-acetylglucosaminyltransferase family protein	1.732
Zm00001d046935	3.414	2.214	cryptochrome 3	4.157
Zm00001d009631	2.104	2.387	CTP synthase family protein	2.175
Zm00001d002773	6.459	6.14	Cupredoxin superfamily protein	7.33
Zm00001d029134	1.633	1.418	CW-type Zinc Finger	1.645
Zm00001d034076	4.6	4.316	Cyclic nucleotide-regulated ion channel family protein	6.616
Zm00001d050475	1.398	1.15	CYCLIN D4;1	1.541
Zm00001d028092	3.224	2.953	cyclin d5;1	3.045
Zm00001d015239	1.625	1.904	cycloartenol synthase 1	1.603
Zm00001d014695	2.926	1.534	cycloartenol synthase 1	2.943
Zm00001d044124	6.459	5.159	Cystathionine beta-synthase (CBS) protein	7.451
Zm00001d049054	1.2	1.115	Cysteine proteinases superfamily protein	1.327
Zm00001d007624	2.455	2.024	Cysteine/Histidine-rich C1 domain family protein	2.56
Zm00001d017425	1.762	1.909	cytochrome B5 isoform E	1.788
Zm00001d032042	4.927	5.224	cytochrome p450 78a9	6.497
Zm00001d003349	1.295	1.17	Cytochrome P450 superfamily protein	1.439
Zm00001d002610	1.827	2.214	cytochrome P450, family 704, subfamily A, polypeptide 2	2.164
Zm00001d048703	1.455	1.877	cytochrome P450, family 71, subfamily A, polypeptide 24	2.791
Zm00001d048702	3.669	4.838	cytochrome P450, family 71, subfamily B, polypeptide 10	4.685
Zm00001d014121	5.633	10.578	cytochrome p450, family 71, subfamily B, polypeptide 11	6.514
Zm00001d014134	2.046	2.872	cytochrome P450, family 71, subfamily B, polypeptide 14	2.715
Zm00001d033152	1.609	1.324	cytochrome P450, family 71, subfamily B, polypeptide 34	2.776
Zm00001d048710	3.898	8.237	cytochrome P450, family 71, subfamily B, polypeptide 37	6.074
Zm00001d030851	1.67	1.683	cytochrome P450, family 81, subfamily D, polypeptide 3	1.876
Zm00001d034097	7.678	10.376	cytochrome P450, family 81, subfamily D, polypeptide 8	8.263
Zm00001d034096	4.241	5.817	cytochrome P450, family 81, subfamily D, polypeptide 8	5.624
Zm00001d034095	4.358	4.115	cytochrome P450, family 81, subfamily D, polypeptide 8	5.871
Zm00001d017528	4.315	4.737	cytochrome P450, family 86, subfamily A, polypeptide 2	5.753
Zm00001d002687	7.269	9.959	cytochrome P450, family 86, subfamily A, polypeptide 4	8.856
Zm00001d013979	7.013	7.697	cytochrome P450, family 86, subfamily B, polypeptide 1	8.074
Zm00001d032651	3.866	3.14	cytochrome P450, family 86, subfamily B, polypeptide 1	4.573
Zm00001d039453	1.357	1.023	cytochrome P450, family 90, subfamily D, polypeptide 1	1.649
Zm00001d012591	4.83	4.439	DC1 domain-containing protein	5.218
Zm00001d011144	1.735	1.281	DCD (Development and Cell Death) domain protein	2.393
Zm00001d045321	5.041	9.157	Dehydrin family protein	7.58
Zm00001d010094	1.777	2.002	Dehydrin family protein	3.21
Zm00001d051420	1.805	1.664	Dehydrin family protein	2.012
Zm00001d013647	1.523	1.357	dehydrin family protein	1.86
Zm00001d037894	6.46	8.851	Dehydrin family protein	8.48
Zm00001d012391	3.254	3.459	delta 1-pyrroline-5-carboxylate synthase 2	3.423
Zm00001d019060	2.878	1.929	Deoxyxylulose-5-phosphate synthase	3.342
Zm00001d037687	1.254	1.255	DERLIN-1	1.458
Zm00001d031254	1.643	1.404	DHBP synthase RibB-like alpha/beta domain;GTP cyclohydrolase II	1.569
Zm00001d043263	1.546	1.911	diacylglycerol kinase 5	1.61
Zm00001d029550	2.33	1.741	diacylglycerol kinase1	2.643
Zm00001d027667	3.486	3.645	Divalent ion symporter	3.162
Zm00001d047726	1.132	1.136	DNAJ heat shock N-terminal domain-containing protein	1.37
Zm00001d052947	2.168	2.154	DNAJ heat shock N-terminal domain-containing protein	2.27
Zm00001d039582	3.855	3.647	DNAse I-like superfamily protein	4.038
Zm00001d035614	2.655	2.305	DNAse I-like superfamily protein	1.937
Zm00001d035612	2.365	2.24	DNAse I-like superfamily protein	1.775
Zm00001d020837	1.597	1.555	DOF zinc finger protein 1	1.777
Zm00001d019763	1.765	1.617	Domain of unknown function (DUF966)	1.52
Zm00001d020607	2.676	2.835	Dormancy/auxin associated family protein	2.956
Zm00001d005804	1.592	2.295	Dormancy/auxin associated family protein	2.565
Zm00001d024885	5.037	3.37	DPP6 N-terminal domain-like protein	5.079
Zm00001d040292	2.1	2.487	drought-induced 21	1.751
Zm00001d038999	1.325	1.325	Drought-responsive family protein	1.694
Zm00001d044693	1.282	1.316	dual specificity protein phosphatase (DsPTP1) family protein	1.242
Zm00001d040504	1.442	1.318	early nodulin-like protein 18	1.037
Zm00001d014463	1.795	1.987	early nodulin-like protein 9	2.077
Zm00001d025903	1.081	1.48	Endosomal targeting BRO1-like domain-containing protein	1.118
Zm00001d043205	1.626	1.306	erf domain protein 9	1.678
Zm00001d022461	1.663	2.059	ethylene-responsive element binding protein	2.257
Zm00001d028591	2.572	1.991	Eukaryotic aspartyl protease family protein	2.656
Zm00001d042898	1.148	1.356	Eukaryotic aspartyl protease family protein	1.321
Zm00001d006525	1.165	1.18	Eukaryotic aspartyl protease family protein	1.454
Zm00001d037868	7.201	6.739	eukaryotic release factor 1-3	7.113
Zm00001d027718	1.233	1.201	expansin 11	2.096
Zm00001d043047	1.62	2.267	expansin A1	2.028
Zm00001d018031	1.579	1.543	expansin A1	1.943
Zm00001d052264	1.433	1.534	expansin A1	1.906
Zm00001d047353	1.926	2.79	expansin A7	3.863
Zm00001d038476	1.322	1.669	expansin A8	1.548
Zm00001d026170	10.725	8.855	expansin B2	8.597
Zm00001d029913	3.457	4.385	expansin B2	4.369
Zm00001d027283	2.577	2.974	expansin B2	3.047
Zm00001d029906	1.792	2.064	expansin B2	1.665
Zm00001d047096	1.509	1.361	expansin B2	1.861
Zm00001d027520	2.368	1.855	expansin-like A1	2.853
Zm00001d049539	1.569	1.406	FAD-binding Berberine family protein	2.035
Zm00001d011673	5.189	6.05	farnesyl diphosphate synthase 1	5.424
Zm00001d014055	4.779	4.507	Fatty acid hydroxylase superfamily	4.015
Zm00001d017251	2.945	3.541	Fatty acid hydroxylase superfamily	2.944
Zm00001d019850	3.684	3.084	fatty acid reductase 1	5.637
Zm00001d000107	3.902	2.926	fatty acid reductase 1	3.818
Zm00001d005148	4.352	3.558	fatty acyl-ACP thioesterases B	5.249
Zm00001d009918	1.483	1.474	F-box family protein	1.367
Zm00001d000224	2.337	2.578	F-box/RNI-like superfamily protein	2.379
Zm00001d025352	2.719	2.776	ferredoxin 3	3.578
Zm00001d028588	2.73	2.609	Fes1A	3.425
Zm00001d001960	5.031	1.931	flavanone 3-hydroxylase	5.54
Zm00001d010698	1.872	1.727	flavodoxin-like quinone reductase 1	1.557
Zm00001d023559	1.365	1.589	fructose-bisphosphate aldolase 2	2.179
Zm00001d046342	1.349	1.848	GA requiring 3	1.771
Zm00001d016066	1.485	1.389	Galactose oxidase/kelch repeat superfamily protein	1.78
Zm00001d007571	1.418	1.84	galacturonosyltransferase 4	1.825
Zm00001d022349	2.745	2.686	galacturonosyltransferase-like 4	3.374
Zm00001d040500	1.761	1.95	G-box binding factor 2	2.329
Zm00001d043992	2.312	2.412	G-box binding factor 3	2.752
Zm00001d039065	1.839	1.737	G-box binding factor 3	2.562
Zm00001d020025	1.001	1.082	G-box binding factor 6	1.256
Zm00001d032572	1.538	1.656	GCR2-like 2	1.799
Zm00001d022496	6.238	10.345	GDSL-like Lipase/Acylhydrolase superfamily protein	8.07
Zm00001d007351	7.202	8.021	GDSL-like Lipase/Acylhydrolase superfamily protein	8.614
Zm00001d043458	6.518	6.932	GDSL-like Lipase/Acylhydrolase superfamily protein	7.984
Zm00001d033079	4.16	6.146	GDSL-like Lipase/Acylhydrolase superfamily protein	4.719
Zm00001d044821	4.548	3.012	GDSL-like Lipase/Acylhydrolase superfamily protein	6.017
Zm00001d017989	2.087	1.892	GDSL-like Lipase/Acylhydrolase superfamily protein	2.176
Zm00001d037025	2.007	1.721	GDSL-like Lipase/Acylhydrolase superfamily protein	2.511
Zm00001d045264	1.767	1.263	GDSL-like Lipase/Acylhydrolase superfamily protein	1.714
Zm00001d036341	1.278	1.782	general regulatory factor 11	1.308
Zm00001d048868	1.851	1.735	general regulatory factor 9	1.982
Zm00001d021929	1.65	1.293	geranylgeranyl pyrophosphate synthase 1	1.426
Zm00001d033369	6.253	5.793	Gibberellin-regulated family protein	7.244
Zm00001d006750	1.093	1.128	Gibberellin-regulated family protein	1.394
Zm00001d039131	2.863	3.265	Glucose-1-phosphate adenylyltransferase family protein	3.51
Zm00001d039258	1.201	1.195	Glucose-6-phosphate/phosphate translocator-related	1.657
Zm00001d031749	2.557	3.021	glutamate decarboxylase	3.034
Zm00001d033747	3.461	2.71	glutamine synthase clone R1	3.932
Zm00001d037079	1.082	1.006	glutathione peroxidase 1	1.096
Zm00001d010520	4.314	5.602	glycerol-3-phosphate acyltransferase 5	5.646
Zm00001d038366	5.111	4.836	glycerol-3-phosphate acyltransferase 5	6.56
Zm00001d045436	1.186	1.263	Glycine cleavage T-protein family	1.481
Zm00001d017032	4.254	6.929	Glycine-rich protein family	5.109
Zm00001d045261	1.282	1.375	Glycogen/starch synthases, ADP-glucose type	1.399
Zm00001d028398	2.157	2.366	Glycosyl hydrolase family 10 protein	2.314
Zm00001d042140	3.027	2.813	Glycosyl hydrolase superfamily protein	5.127
Zm00001d040214	2.499	1.927	Glycosyltransferase family 61 protein	2.735
Zm00001d023664	3.446	3.295	GRAM domain family protein	4.011
Zm00001d043048	1.138	1.233	Granulin repeat cysteine protease family protein	1.243
Zm00001d006744	1.574	1.305	GRAS family transcription factor	1.698
Zm00001d005498	1.131	1.316	guanosine nucleotide diphosphate dissociation inhibitor 1	1.467
Zm00001d033552	3.287	4.36	H(+)-ATPase 11	4.509
Zm00001d045122	2.8	2.976	H(+)-ATPase 6	4.246
Zm00001d032298	3.816	3.412	Haloacid dehalogenase-like hydrolase (HAD) superfamily protein	4.109
Zm00001d007085	1.348	1.474	Haloacid dehalogenase-like hydrolase (HAD) superfamily protein	1.423
Zm00001d007752	4.461	4.401	hAT dimerisation domain-containing protein / transposase-related	4.679
Zm00001d047799	4.54	4.034	heat shock cognate protein 70-1	5.596
Zm00001d038806	1.833	1.644	heat shock protein 101	2.087
Zm00001d031325	2.253	1.939	heat shock protein 21	2.387
Zm00001d042922	4.417	4.142	heat shock protein 70	4.577
Zm00001d012420	2.597	2.343	heat shock protein 70	2.797
Zm00001d024903	4.079	3.691	heat shock protein 90.1	4.41
Zm00001d032923	1.72	1.888	heat shock transcription factor A6B	1.852
Zm00001d016255	5.407	6.384	heat shock transcription factor C1	6.484
Zm00001d046299	1.948	1.735	heat shock transcription factor C1	2.07
Zm00001d044168	1.846	1.372	heat shock transcription factor C1	2.152
Zm00001d002558	1.808	2.108	Heavy metal transport/detoxification superfamily protein	1.903
Zm00001d034978	2.894	1.832	Heavy metal transport/detoxification superfamily protein	3.455
Zm00001d040839	1.726	1.238	Heavy metal transport/detoxification superfamily protein	1.387
Zm00001d038718	1.024	1.74	hemoglobin 1	1.499
Zm00001d036750	1.728	1.401	heptahelical transmembrane protein1	2.767
Zm00001d020100	4.913	4.347	highly ABA-induced PP2C gene 2	5.564
Zm00001d042886	2.324	2.427	highly ABA-induced PP2C gene 2	2.788
Zm00001d028574	3.701	2.351	highly ABA-induced PP2C gene 2	4.356
Zm00001d012401	1.888	1.941	highly ABA-induced PP2C gene 2	2.382
Zm00001d009626	6.413	6.262	highly ABA-induced PP2C gene 3	7.324
Zm00001d011495	5.241	4.589	highly ABA-induced PP2C gene 3	5.686
Zm00001d005609	1.513	1.53	highly ABA-induced PP2C gene 3	1.991
Zm00001d045478	2.78	2.48	histone H1-3	3.241
Zm00001d016456	1.358	1.337	HMG (high mobility group) box protein with ARID/BRIGHT DNA-binding domain	1.616
Zm00001d033791	1.913	2.122	homeobox protein 33	2.74
Zm00001d013409	1.683	2.068	homeobox protein 33	2.085
Zm00001d017422	2.996	1.815	homeobox protein 5	3.407
Zm00001d031019	1.133	1.123	homocysteine methyltransferase 2	1.15
Zm00001d045610	1.233	1.005	homogentisate 1,2-dioxygenase	1.732
Zm00001d025753	6.265	5.032	homolog of carrot EP3-3 chitinase	6.29
Zm00001d003190	2.17	3.781	homolog of carrot EP3-3 chitinase	3.609
Zm00001d003188	2.901	3.757	homolog of carrot EP3-3 chitinase	3.636
Zm00001d003191	1.031	2.116	homolog of carrot EP3-3 chitinase	2.883
Zm00001d050266	3.724	4.545	homolog of CFIM-25	4.406
Zm00001d038846	2.006	1.711	homology to ABI1	2.361
Zm00001d011131	1.13	1.113	homology to ABI1	1.636
Zm00001d044301	1.755	1.656	homology to ABI2	2.224
Zm00001d011202	1.279	1.132	homology to ABI2	1.685
Zm00001d041678	2.559	2.295	HOPZ-ACTIVATED RESISTANCE 1	2.942
Zm00001d044728	4.003	4.902	HSP20-like chaperones superfamily protein	3.695
Zm00001d039941	5.145	3.986	HSP20-like chaperones superfamily protein	5.742
Zm00001d018298	4.182	3.762	HSP20-like chaperones superfamily protein	4.146
Zm00001d052194	1.044	1.184	HSP20-like chaperones superfamily protein	1.025
Zm00001d007341	2.183	1.4	HVA22 homologue E	2.806
Zm00001d026268	7.418	5.79	HXXXD-type acyl-transferase family protein	8.861
Zm00001d051334	4.636	3.712	HXXXD-type acyl-transferase family protein	5.566
Zm00001d036197	3.604	3.575	HXXXD-type acyl-transferase family protein	3.979
Zm00001d042723	2.323	1.952	HXXXD-type acyl-transferase family protein	2.886
Zm00001d033989	1.325	1.552	HXXXD-type acyl-transferase family protein	1.896
Zm00001d024432	1.658	1	HXXXD-type acyl-transferase family protein	1.763
Zm00001d003856	2.564	4.137	hydroxycinnamoyl-CoA shikimate/quinate hydroxycinnamoyl transferase	3.121
Zm00001d027946	4.62	3.125	hydroxycinnamoyl-CoA shikimate/quinate hydroxycinnamoyl transferase	5.236
Zm00001d006774	7.253	7.795	hydroxyproline-rich glycoprotein family protein	8.876
Zm00001d022057	8.531	6.892	hydroxyproline-rich glycoprotein family protein	9.988
Zm00001d022053	6.039	4.147	hydroxyproline-rich glycoprotein family protein	7.241
Zm00001d013588	2.718	3.03	hydroxyproline-rich glycoprotein family protein	2.559
Zm00001d020133	3.726	2.76	hydroxyproline-rich glycoprotein family protein	4.099
Zm00001d022516	3.767	2.061	hydroxyproline-rich glycoprotein family protein	4.645
Zm00001d028998	1.693	1.55	hydroxyproline-rich glycoprotein family protein	1.865
Zm00001d022420	3.054	1.006	hydroxyproline-rich glycoprotein family protein	3.228
Zm00001d007345	5.795	5.27	hydroxysteroid dehydrogenase 1	7.105
Zm00001d010397	4.077	4.32	Immunoglobulin E-set superfamily protein	4.534
Zm00001d038897	2.136	1.621	indole-3-butyric acid response 1	1.955
Zm00001d053727	4.1	3.808	Inorganic H pyrophosphatase family protein	3.992
Zm00001d033300	4.798	4.769	inositol polyphosphate 5-phosphatase 11	4.916
Zm00001d011193	2.13	2.243	integral membrane protein	2.441
Zm00001d016623	7.387	5.041	Integrase-type DNA-binding superfamily protein	7.291
Zm00001d003871	3.334	2.329	Integrase-type DNA-binding superfamily protein	3.512
Zm00001d026486	1.242	2.071	Integrase-type DNA-binding superfamily protein	1.958
Zm00001d045120	1.361	1.768	Integrase-type DNA-binding superfamily protein	1.655
Zm00001d028017	1.135	1.28	Integrase-type DNA-binding superfamily protein	1.739
Zm00001d026182	1.763	2.273	Integrase-type DNA-binding superfamily protein	2.456
Zm00001d013112	1.278	1.468	IQ-domain 5	1.546
Zm00001d026289	1.293	1.111	K+ uptake permease 11	1.511
Zm00001d039434	6.07	7.028	K-box region and MADS-box transcription factor family protein	4.824
Zm00001d040611	1.944	1.853	KNOTTED1-like homeobox gene 6	1.79
Zm00001d012477	5.808	6.328	laccase 12	7.392
Zm00001d043019	4.248	4.373	laccase 12	5.462
Zm00001d042905	2.37	1.655	laccase 17	2.463
Zm00001d048759	2.036	2.076	laccase 7	2.69
Zm00001d042848	2.34	1.665	laccase 7	2.965
Zm00001d037915	5.008	4.71	Late embryogenesis abundant (LEA) hydroxyproline-rich glycoprotein family	4.692
Zm00001d009382	5.004	2.285	Late embryogenesis abundant protein	7.331
Zm00001d038870	6.185	6.877	Late embryogenesis abundant protein (LEA) family protein	7.173
Zm00001d047331	5.008	2.241	late embryogenesis abundant protein-related / LEA protein-related	3.283
Zm00001d052527	1.901	1.576	late embryogenesis abundant protein-related / LEA protein-related	1.725
Zm00001d029585	2.138	1.232	late embryogenesis abundant protein-related / LEA protein-related	1.815
Zm00001d013625	2.101	1.901	Lateral organ boundaries (LOB) domain family protein	2.643
Zm00001d009971	1.488	1.884	Lateral root primordium (LRP) protein-related	2.454
Zm00001d048962	3.306	1.296	Leucine-rich receptor-like protein kinase family protein	2.791
Zm00001d051102	3.286	2.753	Leucine-rich repeat (LRR) family protein	2.897
Zm00001d017203	2.134	1.549	Leucine-rich repeat family protein	2.437
Zm00001d022044	1.35	2.132	Leucine-rich repeat protein kinase family protein	1.695
Zm00001d020171	1.827	2.237	Leucine-rich repeat transmembrane protein kinase	1.673
Zm00001d020172	1.868	1.84	Leucine-rich repeat transmembrane protein kinase	1.738
Zm00001d015853	1.129	1.031	Leucine-rich repeat transmembrane protein kinase	1.47
Zm00001d049171	2.251	1.819	Lipase/lipooxygenase, PLAT/LH2 family protein	2.307
Zm00001d033623	2.833	2.383	lipoxygenase 1	3.745
Zm00001d028718	6.329	5.685	Low temperature and salt responsive protein family	6.6
Zm00001d049525	3.408	4.169	lsd one like 1	3.945
Zm00001d029053	1.442	1.283	Lung seven transmembrane receptor family protein	1.445
Zm00001d003403	4.415	3.049	lysine histidine transporter 1	5.054
Zm00001d024777	7.01	5.972	MADS-box transcription factor family protein	6.378
Zm00001d017453	5.935	5.97	Major facilitator superfamily protein	6.247
Zm00001d030464	4.28	5.49	Major facilitator superfamily protein	5.743
Zm00001d033273	4.448	3.784	Major facilitator superfamily protein	4.676
Zm00001d016982	4.298	3.721	Major facilitator superfamily protein	4.751
Zm00001d038186	5.07	3.71	Major facilitator superfamily protein	6.102
Zm00001d038181	2.894	3.134	Major facilitator superfamily protein	3.381
Zm00001d000072	1.267	2.138	Major facilitator superfamily protein	1.739
Zm00001d045667	1.712	2.077	Major facilitator superfamily protein	1.735
Zm00001d044513	1.801	1.812	Major facilitator superfamily protein	1.966
Zm00001d038179	2.036	1.747	Major facilitator superfamily protein	2.653
Zm00001d038180	1.599	1.736	Major facilitator superfamily protein	1.963
Zm00001d053334	1.555	1.59	Major facilitator superfamily protein	1.542
Zm00001d007785	1.148	1.323	Major facilitator superfamily protein	1.577
Zm00001d033272	1.216	1.244	Major facilitator superfamily protein	1.56
Zm00001d002614	2.997	2.815	Major Facilitator Superfamily with SPX (SYG1/Pho81/XPR1) domain-containing protein	3.434
Zm00001d002175	1.336	1.219	Malectin/receptor-like protein kinase family protein	1.712
Zm00001d035562	2.724	3.332	Mannose-binding lectin superfamily protein	3.055
Zm00001d035561	1.747	3.173	Mannose-binding lectin superfamily protein	1.855
Zm00001d043672	1.295	1.238	MAP kinase kinase 9	1.293
Zm00001d000195	2.934	2.893	MATE efflux family protein	4.305
Zm00001d053234	3.731	2.733	MATE efflux family protein	4.23
Zm00001d015964	1.498	1.992	MATE efflux family protein	1.588
Zm00001d004055	1.335	1.844	MATE efflux family protein	1.496
Zm00001d035115	1.833	1.538	MATE efflux family protein	1.067
Zm00001d051415	4.447	4.36	mechanosensitive channel of small conductance-like 4	4.357
Zm00001d017539	1.141	1.25	mechanosensitive channel of small conductance-like 5	1.437
Zm00001d023715	2.362	2.585	Melibiase family protein	3.087
Zm00001d008620	1.278	1.251	metallothionein 2A	2.196
Zm00001d008974	3.678	3.564	Mitochondrial substrate carrier family protein	3.848
Zm00001d035600	1.694	1.351	mitogen-activated protein kinase phosphatase 1	1.044
Zm00001d019895	1.595	1.146	MLP-like protein 423	1.539
Zm00001d048329	2.226	2.489	multidrug resistance-associated protein 3	2.52
Zm00001d027623	5.846	6.539	myb domain protein 305	6.183
Zm00001d048383	2.036	2.389	myb domain protein 305	2.27
Zm00001d004744	1.344	1.029	myb domain protein 4	1.663
Zm00001d051520	2.211	1.805	myb domain protein 63	2.255
Zm00001d045560	2.554	1.475	myb domain protein 9	3.372
Zm00001d001936	2.26	2.365	myb-like HTH transcriptional regulator family protein	1.926
Zm00001d008808	2.748	1.834	myb-like transcription factor family protein	3.138
Zm00001d008198	1.179	1.639	myb-like transcription factor family protein	1.518
Zm00001d039492	1.933	1.327	myb-like transcription factor family protein	2.046
Zm00001d048201	1.272	1.614	myo-inositol-1-phosphate synthase 2	1.734
Zm00001d044748	6.892	6.93	N/A	7.225
Zm00001d043226	1.229	1.388	N/A	1.664
Zm00001d034433	1.494	1.373	N/A	1.699
Zm00001d009088	1.097	2.053	N/A	1.11
Zm00001d029489	1.511	1.173	N/A	1.07
Zm00001d044078	7.053	11.057	N/A	8.583
Zm00001d031161	6.463	9.138	N/A	7.701
MSTRG.3281	7.958	8.883	N/A	8.32
MSTRG.6372	6.528	7.86	N/A	7.648
REL-sp|P12810|HS16A_WHEAT:sp|P27777|HS16A_ORYSJ:sp|Q943E6|HS16B_ORYSJ:	6.697	7.833	N/A	7.752
MSTRG.35564	6.842	7.655	N/A	7.942
MSTRG.12079	5.565	7.567	N/A	6.685
Zm00001d019704	6.569	7.504	N/A	7.33
Zm00001d037404	7.914	7.444	N/A	8.604
Zm00001d029349	6.894	6.929	N/A	8.426
Zm00001d039935	7.979	6.706	N/A	8.873
Zm00001d029185	6.811	6.649	N/A	6.906
Zm00001d025229	5.67	5.922	N/A	6.594
Zm00001d022222	5.051	5.89	N/A	6.248
Zm00001d016098	4.004	5.828	N/A	4.465
Zm00001d029835	5.965	5.597	N/A	6.365
Zm00001d039786	6.689	5.438	N/A	6.938
Zm00001d022217	5.25	5.302	N/A	6.302
Zm00001d032307	4.503	5.026	N/A	4.396
Zm00001d047259	3.674	4.803	N/A	5.158
Zm00001d000229	3.525	4.342	N/A	4.462
MSTRG.38551	5.399	4.301	N/A	7.085
REL-sp|Q9SKY8|HSP7H_ARATH:	4.985	4.21	N/A	5.435
Zm00001d030498	4.224	4.086	N/A	5.538
REL-sp|Q942D6|HFC1B_ORYSJ:	5.741	3.908	N/A	6.126
Zm00001d020417	4.041	3.902	N/A	4.037
Zm00001d031822	3.743	3.786	N/A	4.89
Zm00001d024403	3.962	3.755	N/A	4.136
Zm00001d014268	3.449	3.669	N/A	3.74
Zm00001d032138	3.789	3.315	N/A	3.698
MSTRG.32039	3.114	3.184	N/A	2.878
MSTRG.7956	3.857	3.167	N/A	4.57
Zm00001d028778	3.205	2.976	N/A	3.491
Zm00001d016076	2.919	2.921	N/A	3.59
MSTRG.4875	3.383	2.918	N/A	3.441
Zm00001d024471	4.958	2.901	N/A	4.089
Zm00001d028389	2.904	2.851	N/A	2.667
Zm00001d015387	2.644	2.79	N/A	3.873
Zm00001d018746	3.801	2.677	N/A	3.183
Zm00001d035659	3.528	2.677	N/A	3.658
Zm00001d020976	3.432	2.571	N/A	3.692
Zm00001d006950	1.82	2.54	N/A	1.907
MSTRG.22217	3.732	2.516	N/A	4.195
Zm00001d027619	2.257	2.466	N/A	3.211
Zm00001d029078	1.934	2.448	N/A	2.058
Zm00001d041634	2.089	2.436	N/A	2.221
MSTRG.8199	2.257	2.393	N/A	2.825
Zm00001d010540	2.053	2.372	N/A	2.095
Zm00001d021075	1.738	2.302	N/A	3.269
Zm00001d052967	1.121	2.278	N/A	1.385
Zm00001d041662	2.604	2.237	N/A	3.139
Zm00001d010632	1.534	2.21	N/A	1.752
Zm00001d009196	2.266	2.182	N/A	2.386
Zm00001d010039	2.209	2.119	N/A	2.338
MSTRG.46557	3.758	2.076	N/A	3.537
Zm00001d009958	2.219	2.011	N/A	2.203
MSTRG.16643	1.912	1.992	N/A	2.371
Zm00001d006608	1.657	1.927	N/A	1.955
Zm00001d038925	1.851	1.921	N/A	1.973
Zm00001d016799	1.579	1.879	N/A	1.543
Zm00001d039335	1.359	1.858	N/A	1.249
MSTRG.45280	1.692	1.851	N/A	1.826
Zm00001d003003	1.616	1.796	N/A	1.436
Zm00001d047723	1.428	1.773	N/A	1.475
Zm00001d004496	1.987	1.764	N/A	1.433
Zm00001d016570	1.875	1.735	N/A	1.964
Zm00001d045030	1.987	1.731	N/A	1.975
MSTRG.43334	1.73	1.65	N/A	1.965
MSTRG.37774	1.066	1.648	N/A	1.296
Zm00001d007593	1.768	1.647	N/A	1.596
MSTRG.22882	1.594	1.62	N/A	1.813
Zm00001d025859	2.427	1.617	N/A	2.341
Zm00001d033797	1.828	1.597	N/A	2.281
Zm00001d020620	1.849	1.583	N/A	2.15
Zm00001d050297	1.195	1.575	N/A	1.054
Zm00001d010912	1.55	1.572	N/A	1.706
Zm00001d026507	1.506	1.569	N/A	1.507
Zm00001d008844	1.236	1.551	N/A	1.773
Zm00001d003158	1.739	1.541	N/A	1.847
Zm00001d030697	1.429	1.513	N/A	1.442
MSTRG.35271	1.306	1.507	N/A	1.309
Zm00001d052409	1.352	1.485	N/A	2.262
Zm00001d029377	1.442	1.484	N/A	1.676
MSTRG.27237	2.572	1.481	N/A	2.602
Zm00001d049028	1.274	1.479	N/A	2.408
Zm00001d039351	1.703	1.478	N/A	1.931
Zm00001d003004	1.423	1.461	N/A	1.72
Zm00001d042853	1.624	1.441	N/A	2.261
Zm00001d017943	1.514	1.432	N/A	1.806
MSTRG.11684	1.15	1.419	N/A	1.548
Zm00001d048135	2.281	1.412	N/A	2.658
Zm00001d029488	1.765	1.404	N/A	1.286
MSTRG.23992	1.052	1.399	N/A	1.205
REL-sp|Q2R1D5|14338_ORYSJ:	1.575	1.382	N/A	1.632
Zm00001d021812	1.065	1.377	N/A	1.274
Zm00001d019793	1.269	1.359	N/A	1.167
Zm00001d007820	1.804	1.348	N/A	1.691
Zm00001d028696	1.504	1.336	N/A	1.414
Zm00001d025414	1.744	1.334	N/A	2.122
Zm00001d022211	1.919	1.334	N/A	2.483
Zm00001d029507	1.065	1.322	N/A	1.118
Zm00001d047913	1.427	1.322	N/A	1.609
Zm00001d008208	2.142	1.308	N/A	2.06
Zm00001d033675	1.19	1.264	N/A	1.256
Zm00001d012050	1.072	1.249	N/A	1.523
Zm00001d018104	1.429	1.244	N/A	2.569
MSTRG.2098	1.035	1.24	N/A	1.302
MSTRG.13502	1.328	1.21	N/A	1.178
MSTRG.41360	1.296	1.202	N/A	1.188
Zm00001d038678	1.499	1.193	N/A	1.821
Zm00001d019792	1.049	1.145	N/A	1.198
Zm00001d018868	1.428	1.138	N/A	1.559
MSTRG.11019	1.079	1.129	N/A	1.221
Zm00001d010343	1.288	1.116	N/A	1.205
Zm00001d013210	2.09	1.115	N/A	1.726
Zm00001d039135	1.64	1.115	N/A	1.895
Zm00001d016080	1.567	1.112	N/A	1.292
Zm00001d015945	1.287	1.101	N/A	1.456
Zm00001d035815	1.209	1.098	N/A	1.243
Zm00001d038593	1.006	1.066	N/A	1.245
Zm00001d021247	1.044	1.057	N/A	1.04
Zm00001d048136	2.127	1.024	N/A	2.371
Zm00001d025091	1.229	1.01	N/A	1.379
MSTRG.25032	7.643	8.237	N/A	8.867
Zm00001d045883	6.099	6.148	Na+/H+ (sodium hydrogen) exchanger 3	6.518
Zm00001d038221	2.712	2.351	NAC (No Apical Meristem) domain transcriptional regulator superfamily protein	3.044
Zm00001d013003	1.714	1.152	NAC (No Apical Meristem) domain transcriptional regulator superfamily protein	1.849
Zm00001d014481	2.347	2.312	NAD(P)-binding Rossmann-fold superfamily protein	2.549
Zm00001d040954	1.962	1.666	NAD(P)-binding Rossmann-fold superfamily protein	1.92
Zm00001d040953	1.934	1.637	NAD(P)-binding Rossmann-fold superfamily protein	2.032
Zm00001d031802	1.45	1.604	NAD(P)-binding Rossmann-fold superfamily protein	1.483
Zm00001d011446	2.034	1.484	NAD(P)-binding Rossmann-fold superfamily protein	1.797
Zm00001d039848	6.334	5.892	NAD(P)-binding Rossmann-fold superfamily protein	6.11
Zm00001d031808	1.956	2.331	NAD(P)-binding Rossmann-fold superfamily protein	2.67
Zm00001d011069	1.225	1.099	NAD(P)-binding Rossmann-fold superfamily protein	1.274
Zm00001d036557	1.657	1.531	NAD(P)H dehydrogenase B1	1.923
Zm00001d038365	2.638	2.73	NAD(P)-linked oxidoreductase superfamily protein	2.311
Zm00001d012764	6.914	7.735	NADP-malic enzyme 3	9.16
Zm00001d015133	3.648	2.304	natural resistance-associated macrophage protein 1	2.361
Zm00001d019327	1.016	1.315	natural resistance-associated macrophage protein 1	1.524
Zm00001d007630	1.039	1.385	NB-ARC domain-containing disease resistance protein	1.078
Zm00001d024975	1.197	1.052	NB-ARC domain-containing disease resistance protein	1.424
Zm00001d013947	2.137	1.607	NDR1/HIN1-like 25	3.264
Zm00001d033222	3.811	2.88	nine-cis-epoxycarotenoid dioxygenase 9	3.832
Zm00001d018206	7.838	5.865	nitrate reductase 1	6.198
Zm00001d046383	1.534	1.522	nitrate transporter 1:2	2.223
Zm00001d018161	2.102	2.101	nitrite reductase 1	2.214
Zm00001d018037	3.842	2.057	NOD26-like intrinsic protein 5;1	4.071
Zm00001d052261	1.867	1.221	NOD26-like intrinsic protein 5;1	2.736
Zm00001d021656	4.12	2.74	nodulin MtN21 /EamA-like transporter family protein	3.716
Zm00001d030507	3.114	2.574	nodulin MtN21 /EamA-like transporter family protein	2.582
Zm00001d020555	1.211	1.204	nodulin MtN21 /EamA-like transporter family protein	1.316
Zm00001d029135	5.57	9.553	Nodulin MtN3 family protein	6.536
Zm00001d029098	2.688	1.484	Nodulin MtN3 family protein	3.274
Zm00001d007397	1.846	1.182	NRAMP metal ion transporter 6	2.172
Zm00001d033625	1.04	1.034	NRAMP metal ion transporter family protein	1.504
Zm00001d006835	2.483	2.459	nuclear factor Y, subunit A3	2.394
Zm00001d013501	4.008	4.616	nuclear factor Y, subunit A9	4.557
Zm00001d033602	1.914	1.864	nuclear factor Y, subunit A9	1.598
Zm00001d024470	3.146	2.217	nuclear RNA polymerase D2A	2.961
Zm00001d022468	3.23	2.579	Nucleic acid-binding proteins superfamily	3.911
Zm00001d044750	1.305	2.851	Nucleic acid-binding, OB-fold-like protein	1.293
Zm00001d033585	3.837	3.384	nucleobase-ascorbate transporter 7	4.595
Zm00001d038263	2.069	1.85	O-fucosyltransferase family protein	2.449
Zm00001d047399	4.412	3.383	O-Glycosyl hydrolases family 17 protein	4.923
Zm00001d029313	3.043	2.537	O-Glycosyl hydrolases family 17 protein	3.351
Zm00001d034035	1.573	1.083	oligopeptide transporter	1.313
Zm00001d049181	1.52	2.87	O-methyltransferase family protein	2.989
Zm00001d013610	2.236	8.209	osmotin 34	4.249
Zm00001d031158	2.841	6.869	osmotin 34	5.24
Zm00001d043121	4.285	6.455	osmotin 34	6.626
Zm00001d033455	3.224	5.898	osmotin 34	5.116
Zm00001d049218	4.416	5.058	Outward rectifying potassium channel protein	5.252
Zm00001d010798	1.715	1.603	oxidative stress 3	2.394
Zm00001d036483	1.446	1.021	PA-domain containing subtilase family protein	1.763
Zm00001d037968	1.277	2.254	PAR1 protein	1.276
Zm00001d010586	8.393	10.754	PEBP (phosphatidylethanolamine-binding protein) family protein	9.265
Zm00001d040725	4.442	5.387	Pectin lyase-like superfamily protein	5.032
Zm00001d009667	5.36	5.046	Pectin lyase-like superfamily protein	4.918
Zm00001d044110	2.833	4.251	Pectin lyase-like superfamily protein	3.212
Zm00001d004448	2.467	2.459	Pectin lyase-like superfamily protein	3.118
Zm00001d020572	1.423	1.081	pentatricopeptide (PPR) repeat-containing protein / CBS domain-containing protein	1.361
Zm00001d027375	1.341	1.467	peptidoglycan-binding LysM domain-containing protein	1.995
Zm00001d049071	11.102	9.239	Peroxidase superfamily protein	11.461
Zm00001d037359	6.545	7.824	Peroxidase superfamily protein	8.035
Zm00001d014341	2.421	2.819	Peroxidase superfamily protein	2.701
Zm00001d029604	1.553	2.077	Peroxidase superfamily protein	1.479
Zm00001d009140	2.265	1.226	Peroxidase superfamily protein	2.566
Zm00001d034900	1.342	1.176	PGR5-LIKE A	1.252
Zm00001d042026	3.389	2.97	Pheophorbide a oxygenase family protein with Rieske [2Fe-2S] domain	3.147
Zm00001d024572	3.095	2.902	phosphate starvation-induced gene 3	3.057
Zm00001d002940	3.391	3.246	phosphatidylinositol-4-phosphate 5-kinase family protein	4.166
Zm00001d018429	2.06	2.166	phosphoenolpyruvate carboxylase kinase 2	2.565
Zm00001d025659	4.279	4.961	phosphofructokinase 2	5.17
Zm00001d039499	3.295	2.49	phosphofructokinase 3	3.913
Zm00001d044211	1.784	1.848	phosphoglucomutase	1.839
Zm00001d029025	4.208	3.144	Phosphoglycerate mutase, 2,3-bisphosphoglycerate-independent	5.659
Zm00001d003297	1.891	1.533	Phototropic-responsive NPH3 family protein	1.889
Zm00001d001858	1.025	1.341	Phototropic-responsive NPH3 family protein	1.495
Zm00001d032353	2.313	2.279	phototropin 2	2.101
Zm00001d044142	2.718	3.1	phy rapidly regulated 2	3.25
Zm00001d015356	1.312	1.322	phytoene desaturation 1	1.18
Zm00001d021410	2.129	1.933	PHYTOENE SYNTHASE	2.104
Zm00001d046493	1.218	1.396	Plant haem oxygenase (decyclizing) family protein	1.259
Zm00001d016740	5.37	4.733	Plant invertase/pectin methylesterase inhibitor superfamily protein	5.623
Zm00001d025821	3.842	3.077	Plant protein of unknown function (DUF828)	5.291
Zm00001d002000	3.766	1.927	PLAT/LH2 domain-containing lipoxygenase family protein	3.845
Zm00001d047074	1.057	1.021	pleckstrin homology (PH) domain-containing protein	1.305
Zm00001d011315	1.977	1.651	pleiotropic drug resistance 12	1.595
Zm00001d008983	5.515	6.469	P-loop containing nucleoside triphosphate hydrolases superfamily protein	6.409
Zm00001d039315	2.255	2.171	P-loop containing nucleoside triphosphate hydrolases superfamily protein	1.985
Zm00001d016273	1.464	1.594	P-loop containing nucleoside triphosphate hydrolases superfamily protein	1.584
Zm00001d042065	1.264	1.503	P-loop containing nucleoside triphosphate hydrolases superfamily protein	1.101
Zm00001d026334	1.669	1.004	polyamine oxidase 2	1.229
Zm00001d036513	1.88	1.217	polyamine oxidase 3	1.246
Zm00001d043596	6.824	8.647	Polyketide cyclase/dehydrase and lipid transport superfamily protein	6.541
Zm00001d010007	1.788	1.367	Polyketide cyclase/dehydrase and lipid transport superfamily protein	2.182
Zm00001d048178	3.984	2.507	polyol/monosaccharide transporter 5	3.822
Zm00001d048776	2.12	2	polyol/monosaccharide transporter 5	3.084
Zm00001d028151	2.753	1.747	polyol/monosaccharide transporter 5	2.719
Zm00001d021943	1.24	1.614	polyol/monosaccharide transporter 5	1.653
Zm00001d033098	3.344	2.205	post-illumination chlorophyll fluorescence increase	4.1
Zm00001d038252	1.737	1.607	potassium transport 2/3	2.795
Zm00001d022449	1.138	1.015	potassium transporter 2	1.204
Zm00001d010060	1.197	2.305	POX (plant homeobox) family protein	1.545
Zm00001d008285	1.559	1.56	PQ-loop repeat family protein / transmembrane family protein	1.738
Zm00001d019337	1.084	1.121	PRLI-interacting factor, putative	1.263
Zm00001d021418	1.357	1.104	PRLI-interacting factor, putative	1.279
Zm00001d016979	1.132	1.235	prohibitin 3	1.521
Zm00001d012761	1.097	1.402	Protein kinase family protein	1.286
Zm00001d017613	1.308	1.19	protein kinase family protein / peptidoglycan-binding LysM domain-containing protein	1.814
Zm00001d047220	2.704	2.708	Protein kinase superfamily protein	3.135
Zm00001d042500	1.847	2.394	Protein kinase superfamily protein	2.317
Zm00001d018352	1.853	2.341	Protein kinase superfamily protein	1.834
Zm00001d030942	2.216	1.583	Protein kinase superfamily protein	2.386
Zm00001d003212	1.466	1.539	Protein kinase superfamily protein	2.476
Zm00001d011628	1.555	1.531	Protein kinase superfamily protein	1.608
Zm00001d011458	1.397	1.201	Protein kinase superfamily protein	1.243
Zm00001d030941	1.85	1.184	Protein kinase superfamily protein	2.031
Zm00001d029975	1.944	1.135	Protein kinase superfamily protein	1.886
Zm00001d036879	2.039	1.121	Protein kinase superfamily protein	1.615
Zm00001d040094	1.129	1.027	Protein kinase superfamily protein	1.128
Zm00001d045124	1.388	1.346	Protein kinase superfamily protein with octicosapeptide/Phox/Bem1p domain	1.192
Zm00001d035818	1.397	1.299	Protein kinase superfamily protein with octicosapeptide/Phox/Bem1p domain	1.654
Zm00001d040784	1.126	1.051	Protein of unknown function (DUF1399)	1.098
Zm00001d011041	2.265	1.859	Protein of unknown function (DUF1635)	3.11
Zm00001d035603	1.063	1.046	Protein of unknown function (DUF1635)	1.093
Zm00001d024004	1.026	1.021	Protein of unknown function (DUF1685)	1.398
Zm00001d029461	3.406	3.366	Protein of unknown function (DUF300)	3.154
Zm00001d016342	1.731	1.14	Protein of unknown function (DUF3511)	2.13
Zm00001d042376	1.593	2.021	Protein of unknown function (DUF506)	1.833
Zm00001d012069	1.322	1.737	Protein of unknown function (DUF506)	1.311
Zm00001d018962	1.614	1.134	Protein of unknown function (DUF506)	1.705
Zm00001d041782	1.626	1.648	Protein of unknown function (DUF579)	1.828
Zm00001d023950	1.604	1.263	Protein of unknown function (DUF579)	1.886
Zm00001d047260	1.948	2.007	Protein of unknown function (DUF581)	2.135
Zm00001d004547	1.037	1.068	Protein of unknown function (DUF594)	1.469
Zm00001d024937	1.189	1.009	Protein of unknown function (DUF594)	1.234
Zm00001d002579	1.713	1.771	Protein of unknown function (DUF604)	2.042
Zm00001d028576	1.481	1.655	Protein of unknown function (DUF604)	1.734
Zm00001d013847	1.066	1.207	Protein of unknown function (DUF604)	1.024
Zm00001d016530	1.195	1.039	Protein of unknown function (DUF803)	1.555
Zm00001d032443	2.785	2.65	Protein of unknown function, DUF538	4.035
Zm00001d013177	1.711	2.016	Protein of unknown function, DUF547	1.546
Zm00001d034191	1.086	1.038	Protein of unknown function, DUF547	1.146
Zm00001d006254	2.149	2.024	Protein phosphatase 2A regulatory B subunit family protein	2.523
Zm00001d025055	7.611	9.038	Protein phosphatase 2C family protein	8.2
Zm00001d053313	2.69	2.23	protein serine/threonine phosphatases;protein kinases;catalytics;cAMP-dependent protein kinase regulators;ATP binding;protein serine/threonine phosphatases	2.922
Zm00001d041049	1.247	1.066	Protein with RING/U-box and TRAF-like domains	1.252
Zm00001d007240	2.021	1.443	pseudo-response regulator 7	1.337
Zm00001d026042	2.384	2.204	purine permease 11	3.383
Zm00001d034839	1.13	1.752	purple acid phosphatase 15	1.031
Zm00001d050026	1.414	1.08	purple acid phosphatase 23	1.328
Zm00001d030765	2	1.428	purple acid phosphatase 27	1.736
Zm00001d046766	1.704	2.373	Putative glycosyl hydrolase of unknown function (DUF1680)	1.81
Zm00001d011246	1.264	1.221	Putative lysine decarboxylase family protein	1.628
Zm00001d046970	1.466	1.688	putative recombination initiation defect 1	1.436
Zm00001d013992	2.133	2.27	Pyridoxal phosphate (PLP)-dependent transferases superfamily protein	2.084
Zm00001d016720	1.657	1.746	Pyridoxal phosphate (PLP)-dependent transferases superfamily protein	1.778
Zm00001d029285	1.369	1.258	pyruvate dehydrogenase kinase	1.603
Zm00001d037059	1.045	1.182	Pyruvate phosphate dikinase, PEP/pyruvate binding domain	1.193
Zm00001d039685	4.644	4.8	Raffinose synthase family protein	5.515
Zm00001d011123	5.084	5.583	Ran BP2/NZF zinc finger-like superfamily protein	4.234
Zm00001d006509	2.376	2.193	Ras-related small GTP-binding family protein	2.488
Zm00001d043595	1	1.077	Regulator of chromosome condensation (RCC1) family protein	1.352
Zm00001d048208	1.637	1.212	related to AP2 4	1.992
Zm00001d032295	1.523	1.049	related to AP2 4	1.989
Zm00001d031993	1.62	1.958	Rhamnogalacturonate lyase family protein	2.038
Zm00001d008444	1.337	1.871	RHD SIX-LIKE 1	1.113
Zm00001d011763	1.19	1.07	RING/FYVE/PHD zinc finger superfamily protein	1.287
Zm00001d017645	4.799	6.357	RING/U-box superfamily protein	5.506
Zm00001d006879	3.484	2.234	RING/U-box superfamily protein	4.806
Zm00001d032550	2.042	1.906	RING/U-box superfamily protein	2.635
Zm00001d027308	1.524	1.888	RING/U-box superfamily protein	1.496
Zm00001d032557	1.567	1.586	RING/U-box superfamily protein	1.917
Zm00001d020861	1.37	1.584	RING/U-box superfamily protein	1.654
Zm00001d051501	1.971	1.563	RING/U-box superfamily protein	2.081
Zm00001d013716	1.108	1.287	RING/U-box superfamily protein	1.103
Zm00001d018028	2.248	1.2	RING/U-box superfamily protein	2.084
Zm00001d037095	1.39	1.137	RING/U-box superfamily protein	2.038
Zm00001d032925	1.041	1.141	RmlC-like cupins superfamily protein	1.052
Zm00001d040997	2.942	1.261	RmlC-like cupins superfamily protein	2.85
Zm00001d051139	1.918	1.704	RNA-binding (RRM/RBD/RNP motifs) family protein	1.809
Zm00001d047847	1.273	1.212	RNA-binding (RRM/RBD/RNP motifs) family protein	1.439
Zm00001d023299	1.198	1.087	RNA-binding (RRM/RBD/RNP motifs) family protein	1.246
Zm00001d024252	2.709	2.994	RNI-like superfamily protein	2.899
Zm00001d052961	4.028	4.201	Root hair defective 3 GTP-binding protein (RHD3)	4.964
Zm00001d004243	2.559	3.182	rotamase FKBP 1	2.693
Zm00001d048598	2.549	3.233	ROTUNDIFOLIA like 2	2.515
Zm00001d032606	1.185	1.309	RPA70-kDa subunit B	1.079
Zm00001d007135	3.24	3.134	Rubber elongation factor protein (REF)	3.237
Zm00001d038891	4.93	3.94	S-adenosyl-L-methionine-dependent methyltransferases superfamily protein	5.482
Zm00001d007592	2.153	1.745	S-adenosyl-L-methionine-dependent methyltransferases superfamily protein	2.358
Zm00001d043771	1.864	1.327	S-adenosyl-L-methionine-dependent methyltransferases superfamily protein	1.772
Zm00001d049097	1.468	1.157	saposin B domain-containing protein	1.333
Zm00001d025539	1.253	1.042	saposin B domain-containing protein	1.236
Zm00001d005802	3.836	3.166	SAUR-like auxin-responsive protein family	4.369
Zm00001d005803	1.966	2.339	SAUR-like auxin-responsive protein family	2.242
Zm00001d045434	1.313	1.108	Sec1/munc18-like (SM) proteins superfamily	1.374
Zm00001d042275	2.048	1.819	Sec14p-like phosphatidylinositol transfer family protein	2.052
Zm00001d042274	1.837	1.666	Sec14p-like phosphatidylinositol transfer family protein	2.36
Zm00001d048066	1.701	1.603	Sec14p-like phosphatidylinositol transfer family protein	1.4
Zm00001d019163	3.503	3.538	seed imbibition 2	4.246
Zm00001d040660	2.384	1.872	senescence-associated gene 21	3.331
Zm00001d040659	2.196	1.801	senescence-associated gene 21	2.346
Zm00001d050577	6.343	6.158	senescence-associated gene 29	7.335
Zm00001d016590	4.558	4.671	senescence-associated gene 29	4.747
Zm00001d048690	2.127	3.243	serine carboxypeptidase-like 50	2.408
Zm00001d047531	1.536	1.458	serine/threonine protein kinase 2	1.559
Zm00001d040672	2.563	2.441	SERINE-ARGININE PROTEIN 30	2.615
Zm00001d040245	2.456	5.594	serine-type endopeptidase inhibitors	3.473
Zm00001d029664	1.108	1.113	shaggy-like protein kinase 32	1.541
Zm00001d026290	1.263	1.044	short-chain dehydrogenase-reductase B	1.285
Zm00001d012208	1.13	1.671	S-locus lectin protein kinase family protein	1.447
Zm00001d045945	1.15	1.343	S-locus lectin protein kinase family protein	1.213
Zm00001d002174	1.383	1.161	S-locus lectin protein kinase family protein	1.181
Zm00001d047403	1.397	1.3	SNARE associated Golgi protein family	1.493
Zm00001d012019	1.129	1.141	SNF1-related protein kinase regulatory subunit gamma 1	1.199
Zm00001d022504	1.616	1.246	sodium hydrogen exchanger 2	1.608
Zm00001d007363	1.768	1.636	somatic embryogenesis receptor-like kinase 1	3.298
Zm00001d039378	2.374	1.578	sporocyteless (SPL)	1.939
Zm00001d016684	2.579	4.307	starch branching enzyme 2.2	3.06
Zm00001d003817	1.415	1.822	starch branching enzyme 2.2	1.625
Zm00001d000002	1.408	2.104	starch synthase 3	2.253
Zm00001d002256	1.135	1.203	starch synthase 3	1.295
Zm00001d013035	1.53	1.349	sterol methyltransferase 1	1.183
Zm00001d026414	2.296	1.156	stress enhanced protein 2	2.719
Zm00001d037985	6.627	4.613	Stress induced protein	6.568
Zm00001d022155	2.863	1.984	STRUBBELIG-receptor family 6	3.336
Zm00001d039129	1.616	3.295	subtilase 4.13	3.419
Zm00001d050125	1.503	1.337	sucrose phosphate synthase 1F	1.417
Zm00001d042353	1.916	2.469	sucrose phosphate synthase 3F	2.544
Zm00001d029087	2.579	2.727	sucrose synthase 1	3.315
Zm00001d029091	2.818	2.765	sucrose synthase 3	3.434
Zm00001d027749	2.177	1.614	sulfate transporter 3;1	2.441
Zm00001d000204	1.233	1.184	sulfate transporter 3;4	1.759
Zm00001d005736	1.406	1.28	TBP-associated factor 2	1.235
Zm00001d003785	1.486	1.662	TCP-1/cpn60 chaperonin family protein	1.569
Zm00001d015221	1.392	1.603	TCP-1/cpn60 chaperonin family protein	1.279
Zm00001d024211	6.321	12.541	Terpenoid cyclases/Protein prenyltransferases superfamily protein	6.535
Zm00001d024207	6.229	10.059	Terpenoid cyclases/Protein prenyltransferases superfamily protein	6.329
Zm00001d024210	6.186	7.644	Terpenoid cyclases/Protein prenyltransferases superfamily protein	6.553
Zm00001d029648	2.386	6.206	Terpenoid cyclases/Protein prenyltransferases superfamily protein	2.726
Zm00001d041082	1.653	2.299	Terpenoid cyclases/Protein prenyltransferases superfamily protein	2.708
Zm00001d046530	4.594	3.558	Tetratricopeptide repeat (TPR)-like superfamily protein	4.38
Zm00001d005359	1.67	1.62	Tetratricopeptide repeat (TPR)-like superfamily protein	1.925
Zm00001d016802	1.675	2.023	thylakoidal ascorbate peroxidase	1.729
Zm00001d015985	1.071	1.174	tocopherol cyclase, chloroplast / vitamin E deficient 1 (VTE1) / sucrose export defective 1 (SXD1)	1.146
Zm00001d008305	3.692	3.304	TRAM, LAG1 and CLN8 (TLC) lipid-sensing domain containing protein	3.862
Zm00001d017573	1.23	1.361	transcription factor-related	1.276
Zm00001d024671	1.516	2.073	Transducin/WD40 repeat-like superfamily protein	1.554
Zm00001d002658	1.708	1.856	Transducin/WD40 repeat-like superfamily protein	1.841
Zm00001d037932	1.309	1.531	Transducin/WD40 repeat-like superfamily protein	1.396
Zm00001d041449	2.248	1.375	Transducin/WD40 repeat-like superfamily protein	1.508
Zm00001d004171	6.12	7.45	Transketolase	7.121
Zm00001d052063	1.721	1.728	Transmembrane amino acid transporter family protein	1.946
Zm00001d037248	6.538	7.885	TRICHOME BIREFRINGENCE-LIKE 22	7.76
Zm00001d025827	1.801	1.761	triglyceride lipases;triglyceride lipases	2.065
Zm00001d010856	4.901	5.971	TSPO(outer membrane tryptophan-rich sensory protein)-related	6.569
Zm00001d046377	1.674	2.056	type one serine/threonine protein phosphatase 2	1.843
Zm00001d007462	2.969	3.6	Tyrosine transaminase family protein	3.545
Zm00001d012109	2.411	2.89	Ubiquitin-like superfamily protein	2.296
Zm00001d045230	1.326	1.131	U-box domain-containing protein kinase family protein	1.735
Zm00001d036940	2.316	1.818	UDP-galactose transporter 1	2.622
Zm00001d004248	4.702	3.225	UDP-glucosyl transferase 85A2	5.132
Zm00001d000237	4.465	4.189	UDP-glycosyltransferase 73B4	5.105
Zm00001d019265	4.503	3.072	UDP-Glycosyltransferase superfamily protein	3.487
Zm00001d045055	1.418	1.276	UDP-Glycosyltransferase superfamily protein	1.527
Zm00001d043166	1.174	1.212	UDP-Glycosyltransferase superfamily protein	1.361
Zm00001d010038	2.723	2.042	Uncharacterised protein family (UPF0497)	4.106
Zm00001d046916	1.642	1.742	Uncharacterised protein family (UPF0497)	2.051
Zm00001d023936	1.817	1.442	Uncharacterised protein family (UPF0497)	2.149
Zm00001d026285	1.25	1.32	Uncharacterized conserved protein (DUF2358)	1.404
Zm00001d015246	1.143	1.126	Uncharacterized protein	1.201
Zm00001d029620	1.162	1.208	Uridine diphosphate glycosyltransferase 74E2	1.192
Zm00001d035875	1.066	1.031	Vacuolar iron transporter (VIT) family protein	1.095
Zm00001d019298	2.131	2.735	vesicle-associated membrane protein 724	2.256
Zm00001d037453	3.765	4.162	VIRB2-interacting protein 2	4.071
Zm00001d032644	1.353	1.638	Vps52 / Sac2 family	1.194
Zm00001d013550	5.791	5.816	VQ motif-containing protein	6.292
Zm00001d002160	1.013	1.277	Wound-responsive family protein	1.452
Zm00001d012789	9.02	4.328	WRKY DNA-binding protein 24	10.829
Zm00001d011413	2.257	2.082	WRKY DNA-binding protein 28	2.396
Zm00001d038761	7.397	7.431	WRKY DNA-binding protein 56	9.032
Zm00001d005622	1.798	1.777	WRKY family transcription factor	1.961
Zm00001d028986	4.278	3.768	WUSCHEL related homeobox 11	5.137
Zm00001d022524	1.325	1.072	WUSCHEL related homeobox 11	1.784
Zm00001d027313	2.637	3.065	xyloglucan endotransglucosylase/hydrolase 32	2.408
Zm00001d007113	1.313	1.111	xylose isomerase family protein	1.5
Zm00001d013498	1.503	1.062	Yippee family putative zinc-binding protein	1.458
Zm00001d003512	1.648	1.664	zeaxanthin epoxidase (ZEP) (ABA1)	1.816
Zm00001d024886	5.182	4.968	Zinc finger (C3HC4-type RING finger) family protein	5.206
Zm00001d024014	5.064	4.584	Zinc finger (C3HC4-type RING finger) family protein	4.985
Zm00001d036068	2.323	2.812	Zinc finger (C3HC4-type RING finger) family protein	1.924
Zm00001d037769	5.855	6.452	Zinc finger C-x8-C-x5-C-x3-H type family protein	6.427
Zm00001d010380	3.562	4.242	Zinc finger C-x8-C-x5-C-x3-H type family protein	4.367
Zm00001d020954	1.05	1.065	Zinc finger C-x8-C-x5-C-x3-H type family protein	1.143
Zm00001d043296	1.756	2.209	zinc knuckle (CCHC-type) family protein	2.125
Zm00001d036965	2.657	2.125	zinc transporter 4 precursor	2.225
Zm00001d020932	1.02	1.136	basic helix-loop-helix (bHLH) DNA-binding superfamily protein	NS
Zm00001d027448	1.181	1.146	CBS domain-containing protein with a domain of unknown function (DUF21)	NS
Zm00001d017495	1.525	1.695	expansin B4	NS
Zm00001d009028	1.498	1.153	Glucose-6-phosphate/phosphate translocator-related	NS
Zm00001d034725	2.258	2.416	Haloacid dehalogenase-like hydrolase (HAD) superfamily protein	NS
Zm00001d048740	1.347	1.201	Leucine-rich repeat (LRR) family protein	NS
Zm00001d017597	1.395	2.328	Major Facilitator Superfamily with SPX (SYG1/Pho81/XPR1) domain-containing protein	NS
Zm00001d007697	1.999	2.784	N/A	NS
Zm00001d047231	2.71	1.717	N/A	NS
MSTRG.32188	1.727	1.628	N/A	NS
Zm00001d053406	1.267	1.282	N/A	NS
Zm00001d019794	1.048	1.226	N/A	NS
MSTRG.8097	1	1.089	N/A	NS
Zm00001d050775	1.183	1.18	NAD(P)-binding Rossmann-fold superfamily protein	NS
Zm00001d051870	1.109	1.239	O-methyltransferase family protein	NS
Zm00001d031157	5.619	7.387	osmotin 34	NS
Zm00001d034551	2.886	3.684	Pectin lyase-like superfamily protein	NS
Zm00001d011734	1.76	5.055	phosphate starvation-induced gene 2	NS
Zm00001d006293	1.207	1.293	Plant regulator RWP-RK family protein	NS
Zm00001d042695	1.081	1.264	Protein kinase superfamily protein	NS
Zm00001d051180	1.161	1.203	Protein of unknown function (DUF3755)	NS
Zm00001d012522	1.04	1.166	Protein of unknown function (DUF607)	NS
Zm00001d003185	1.571	1.016	Protein of unknown function, DUF642	NS
Zm00001d017307	1.02	1.436	response regulator 3	NS
Zm00001d052189	1.353	1.391	RING/U-box superfamily protein	NS
Zm00001d032428	1.062	1.069	Serinc-domain containing serine and sphingolipid biosynthesis protein	NS
Zm00001d029460	1.6	2.149	SPX domain gene 3	NS
Zm00001d012036	2.4	4.45	sucrose phosphate synthase 3F	NS
Zm00001d044228	1.827	1.401	thiazole biosynthetic enzyme, chloroplast (ARA6) (THI1) (THI4)	NS
Zm00001d051976	1.193	1.501	UDP-Glycosyltransferase superfamily protein	NS
Zm00001d031736	1.2	1.416	winged-helix DNA-binding transcription factor family protein	NS
Zm00001d036072	1.246	2.637	Zinc finger (C3HC4-type RING finger) family protein	NS
Zm00001d011097	-1.565	-2.66	12-oxophytodienoate reductase 1	-2.796
Zm00001d033862	-2.405	-2.985	1-amino-cyclopropane-1-carboxylate synthase 8	-3.058
Zm00001d026060	-2.603	-3.338	1-aminocyclopropane-1-carboxylic acid (acc) synthase 6	-4.155
Zm00001d045383	-1.068	-1.02	1-deoxy-D-xylulose 5-phosphate synthase 3	-1.347
Zm00001d009503	-1.33	-1.686	2-oxoglutarate (2OG) and Fe(II)-dependent oxygenase superfamily protein	-1.523
Zm00001d024853	-1.898	-2.346	2-oxoglutarate (2OG) and Fe(II)-dependent oxygenase superfamily protein	-4.761
Zm00001d042996	-1.199	-1.141	2-oxoglutarate (2OG) and Fe(II)-dependent oxygenase superfamily protein	-1.195
Zm00001d046537	-4.07	-4.347	ABC-2 type transporter family protein	-3.65
Zm00001d016811	-2.549	-2.431	ACT domain repeat 3	-2.181
Zm00001d013873	-1.265	-1.182	actin 7	-1.217
Zm00001d032480	-2.05	-1.984	actin 7	-2.298
Zm00001d027534	-2.036	-2.309	acyl activating enzyme 1	-1.448
Zm00001d037529	-1.394	-1.534	Acyl-CoA N-acyltransferase with RING/FYVE/PHD-type zinc finger protein	-1.384
Zm00001d034418	-1.358	-2.088	Acyl-CoA N-acyltransferases (NAT) superfamily protein	-1.875
Zm00001d027861	-2.329	-2.692	alanine:glyoxylate aminotransferase 2	-2.818
Zm00001d026635	-1.558	-2.467	allantoinase	-1.594
Zm00001d047340	-1.142	-1.142	allene oxide cyclase 3	-1.267
Zm00001d050011	-1.887	-2.095	alpha carbonic anhydrase 7	-2.933
Zm00001d031779	-1.99	-3.861	alpha carbonic anhydrase 7	-2.761
Zm00001d027434	-1.496	-2.019	Alpha/beta hydrolase related protein	-1.502
Zm00001d018848	-1.223	-1.147	alpha/beta-Hydrolases superfamily protein	-1.283
Zm00001d010463	-1.798	-2.108	alpha/beta-Hydrolases superfamily protein	-1.345
Zm00001d044947	-1.554	-2.116	alpha/beta-Hydrolases superfamily protein	-1.218
Zm00001d000037	-1.869	-2.612	alpha/beta-Hydrolases superfamily protein	-2.024
Zm00001d002436	-1.791	-1.944	alternative oxidase 1A	-1.773
Zm00001d046029	-1.388	-1.614	Aluminium activated malate transporter family protein	-1.444
Zm00001d026632	-2.972	-3.437	Aluminium induced protein with YGL and LRDR motifs	-1.491
Zm00001d011001	-3.098	-3.171	aluminum sensitive 3	-3.157
Zm00001d035243	-1.091	-2.195	amino acid permease 6	-1.889
Zm00001d028649	-1.805	-2.073	Ankyrin repeat family protein	-1.851
Zm00001d028680	-3.097	-2.895	Ankyrin repeat family protein	-2.863
Zm00001d042111	-1.734	-2.448	Ankyrin repeat family protein / BTB/POZ domain-containing protein	-1.162
Zm00001d023298	-2.392	-2.724	apyrase 2	-2.648
Zm00001d041608	-1.175	-1.224	Arabidopsis Inositol phosphorylceramide synthase 1	-1.121
Zm00001d002671	-1.007	-1.298	Arabidopsis protein of unknown function (DUF241)	-1.19
Zm00001d004862	-2.038	-2.015	Arabidopsis protein of unknown function (DUF241)	-2.54
Zm00001d010434	-1.751	-1.568	arabinogalactan protein 16	-1.941
Zm00001d007728	-7.106	-9.554	ATP-dependent caseinolytic (Clp) protease/crotonase family protein	-4.448
Zm00001d022518	-2.408	-2.52	atypical CYS HIS rich thioredoxin 4	-1.711
Zm00001d038576	-1.568	-1.617	autoinhibited Ca(2+)-ATPase, isoform 4	-1.59
Zm00001d048191	-1.117	-1.442	Auxin-responsive family protein	-1.112
Zm00001d043737	-1.429	-1.921	AWPM-19-like family protein	-2.366
Zm00001d039240	-1.771	-2.284	AWPM-19-like family protein	-2.327
Zm00001d011657	-1.598	-2.495	AWPM-19-like family protein	-2.246
Zm00001d000434	-1.264	-2.314	AZA-guanine resistant1	-1.277
Zm00001d019358	-1.023	-1.065	B12D protein	-1.052
Zm00001d044272	-2.536	-3.254	basic helix-loop-helix (bHLH) DNA-binding family protein	-2.088
Zm00001d017138	-3.762	-3.725	basic helix-loop-helix (bHLH) DNA-binding superfamily protein	-4.022
Zm00001d046937	-4.978	-5.011	basic leucine zipper 9	-4.647
Zm00001d035440	-1.245	-1.155	basic region/leucine zipper motif 53	-1.27
Zm00001d033898	-2.39	-2.072	BEL1-like homeodomain 4	-2.747
Zm00001d044099	-1.776	-1.754	beta carbonic anhydrase 4	-2.201
Zm00001d041168	-1.665	-2.032	beta glucosidase 13	-2.163
Zm00001d024000	-1.928	-2.064	beta glucosidase 13	-2.467
Zm00001d007732	-2.724	-2.939	beta-hydroxyisobutyryl-CoA hydrolase 1	-3.581
Zm00001d007726	-5.95	-8.722	beta-hydroxyisobutyryl-CoA hydrolase 1	-4.156
Zm00001d004700	-1.781	-2.38	Bifunctional inhibitor/lipid-transfer protein/seed storage 2S albumin superfamily protein	-2.791
Zm00001d022195	-2.971	-2.914	Bifunctional inhibitor/lipid-transfer protein/seed storage 2S albumin superfamily protein	-3.548
Zm00001d017508	-3.71	-3.488	Bifunctional inhibitor/lipid-transfer protein/seed storage 2S albumin superfamily protein	-6.076
Zm00001d017612	-1.115	-1.894	brassinosteroid-responsive RING-H2	-1.702
Zm00001d025707	-1.834	-2.161	BTB and TAZ domain protein 2	-2.157
Zm00001d026505	-1.851	-2.052	BTB-POZ and MATH domain 4	-2.239
Zm00001d030997	-1.26	-1.724	BURP domain-containing protein	-2.137
Zm00001d052543	-1.002	-1.626	bZIP transcription factor family protein	-1.197
Zm00001d040196	-2.472	-2.892	C-8,7 sterol isomerase	-1.883
Zm00001d009844	-1.123	-1.117	Calcineurin-like metallo-phosphoesterase superfamily protein	-1.343
Zm00001d037477	-1.206	-1.201	Calcium-binding EF-hand family protein	-1.411
Zm00001d053926	-1.162	-1.295	Calcium-binding EF-hand family protein	-1.411
Zm00001d037173	-1.029	-1.338	Calcium-binding EF-hand family protein	-1.778
Zm00001d022234	-1.161	-1.566	Calcium-binding EF-hand family protein	-1.873
Zm00001d014491	-1.163	-1.826	Calcium-binding EF-hand family protein	-1.618
Zm00001d007015	-1.313	-1.844	Calcium-binding EF-hand family protein	-1.804
Zm00001d005766	-1.018	-2.268	Calcium-binding EF-hand family protein	-1.506
Zm00001d047638	-1.05	-1.496	Calcium-dependent phosphotriesterase superfamily protein	-1.529
Zm00001d030670	-2.317	-2.594	Caleosin-related family protein	-1.348
Zm00001d025799	-1.222	-1.588	calmodulin-binding receptor-like cytoplasmic kinase 3	-1.189
Zm00001d026018	-1.067	-1.406	calmodulin-domain protein kinase 5	-1.177
Zm00001d002540	-1.199	-1.585	calmodulin-domain protein kinase 5	-1.285
Zm00001d041430	-1.358	-1.663	calmodulin-like 11	-1.892
Zm00001d005895	-2.001	-2.469	calmodulin-like 11	-1.315
Zm00001d018322	-1.242	-1.103	CAP (Cysteine-rich secretory proteins, Antigen 5, and Pathogenesis-related 1 protein) superfamily protein	-1.17
Zm00001d029558	-2.322	-3.538	CAP (Cysteine-rich secretory proteins, Antigen 5, and Pathogenesis-related 1 protein) superfamily protein	-2.81
Zm00001d002736	-1.946	-3.317	carotenoid cleavage dioxygenase 7	-4.308
Zm00001d006944	-1.357	-1.664	CBL-interacting protein kinase 1	-1.191
Zm00001d022547	-1.431	-1.499	CBL-interacting protein kinase 3	-1.9
Zm00001d017375	-3.538	-4.141	CBS domain-containing protein	-2.375
Zm00001d003709	-1.61	-1.03	cell wall / vacuolar inhibitor of fructosidase 2	-1.354
Zm00001d025354	-2.039	-4.055	cell wall invertase 2	-3.631
Zm00001d010442	-1.534	-1.561	cell wall-associated kinase	-1.779
Zm00001d052915	-1.622	-1.984	Chalcone and stilbene synthase family protein	-2.227
Zm00001d014790	-2.673	-3.138	Chaperone DnaJ-domain superfamily protein	-1.781
Zm00001d032084	-6.361	-6.244	Chaperone DnaJ-domain superfamily protein	-7.712
Zm00001d048016	-4.77	-6.832	chitin elicitor receptor kinase 1	-4.993
Zm00001d016855	-1.378	-1.179	chloride channel C	-2.071
Zm00001d029983	-2.848	-2.956	chloroplast beta-amylase	-1.085
Zm00001d008587	-2.353	-2.614	Class I glutamine amidotransferase-like superfamily protein	-3.984
Zm00001d030759	-1.385	-1.298	Concanavalin A-like lectin protein kinase family protein	-1.146
Zm00001d006638	-1.26	-1.633	Copper amine oxidase family protein	-1.871
Zm00001d044604	-2.003	-2.948	CRINKLY4 related 3	-1.451
Zm00001d011486	-1.818	-1.152	CTP synthase family protein	-1.557
Zm00001d032504	-2.3	-1.357	Cupredoxin superfamily protein	-2.295
Zm00001d017441	-1.075	-1.249	cyclin p4;3	-1.005
Zm00001d006098	-2.422	-1.899	Cyclopropane-fatty-acyl-phospholipid synthase	-1.282
Zm00001d049103	-1.317	-1.564	Cysteine/Histidine-rich C1 domain family protein	-1.096
Zm00001d021698	-2.745	-2.882	cysteine-rich RLK (RECEPTOR-like protein kinase) 10	-2.705
Zm00001d021684	-1.842	-1.87	cysteine-rich RLK (RECEPTOR-like protein kinase) 20	-1.404
Zm00001d021699	-4.821	-4.85	cysteine-rich RLK (RECEPTOR-like protein kinase) 6	-5.448
Zm00001d039650	-1.135	-1.28	Cytochrome P450 superfamily protein	-1.306
Zm00001d022351	-2.133	-2.796	Cytochrome P450 superfamily protein	-2.408
Zm00001d005823	-2.572	-3.598	Cytochrome P450 superfamily protein	-3.243
Zm00001d046603	-1.385	-1.466	cytochrome P450, family 71, subfamily A, polypeptide 25	-1.138
Zm00001d015589	-2.164	-2.466	cytochrome P450, family 71, subfamily B, polypeptide 37	-2.198
Zm00001d039384	-1.689	-1.629	cytochrome P450, family 710, subfamily A, polypeptide 1	-1.67
Zm00001d039697	-1.528	-2.243	cytochrome P450, family 711, subfamily A, polypeptide 1	-1.088
Zm00001d044146	-1.659	-2.848	cytochrome P450, family 72, subfamily A, polypeptide 14	-4.494
Zm00001d028419	-1.106	-1.109	cytochrome P450, family 76, subfamily C, polypeptide 1	-1.526
Zm00001d006649	-1.709	-1.173	cytochrome P450, family 87, subfamily A, polypeptide 6	-1.22
Zm00001d013230	-1.409	-2.039	cytochrome P450, family 91, subfamily A, polypeptide 2	-1.775
Zm00001d044703	-1.321	-2.13	cytochrome P450, family 94, subfamily C, polypeptide 1	-1.565
Zm00001d052530	-2.13	-3.124	cytochrome P450, family 94, subfamily C, polypeptide 1	-4.511
Zm00001d004804	-1.712	-1.817	cytosolic invertase 2	-1.581
Zm00001d049683	-4.5	-5.015	D-arabinono-1,4-lactone oxidase family protein	-3.069
Zm00001d003994	-6.049	-7.99	deoxyhypusine synthase	-7.691
Zm00001d038321	-1.177	-1.096	DHHC-type zinc finger family protein	-1.251
Zm00001d004451	-1.369	-2.256	D-isomer specific 2-hydroxyacid dehydrogenase family protein	-1.97
Zm00001d005767	-2.997	-3.677	DNA glycosylase superfamily protein	-3.136
Zm00001d042653	-1.846	-1.797	DNAJ heat shock family protein	-1.374
Zm00001d020973	-1.378	-1.214	DNAJ heat shock N-terminal domain-containing protein	-1.276
Zm00001d028366	-1.532	-1.755	DNAse I-like superfamily protein	-1.615
Zm00001d001824	-3.104	-3.435	Dof-type zinc finger DNA-binding family protein	-2.842
Zm00001d041965	-1.437	-1.235	Drought-responsive family protein	-1.742
Zm00001d038270	-1.288	-1.496	Duplicated homeodomain-like superfamily protein	-1.188
Zm00001d042108	-1.063	-1.255	EF hand calcium-binding protein family	-1.041
Zm00001d020400	-1.943	-2.877	elicitor-activated gene 3-1	-2.071
Zm00001d028694	-3.362	-3.704	ent-kaurenoic acid hydroxylase 2	-2.353
Zm00001d047830	-3.314	-6.264	ent-kaurenoic acid hydroxylase 2	-5.76
Zm00001d002748	-1.246	-1.169	ERF family protein 38	-1.568
Zm00001d019734	-2.585	-3.554	ethylene response factor 1	-3.65
Zm00001d002762	-1.817	-2.235	ethylene responsive element binding factor 1	-2.011
Zm00001d026191	-1.351	-2.3	ethylene responsive element binding factor 1	-1.572
Zm00001d017462	-1.329	-2.355	ethylene responsive element binding factor 1	-2.071
Zm00001d039910	-1.207	-1.142	Eukaryotic aspartyl protease family protein	-1.072
Zm00001d012633	-1.061	-1.409	Eukaryotic aspartyl protease family protein	-1.095
Zm00001d038969	-1.679	-1.652	Eukaryotic aspartyl protease family protein	-1.584
Zm00001d010722	-1.351	-1.778	Eukaryotic aspartyl protease family protein	-1.607
Zm00001d021677	-1.089	-2.512	Eukaryotic aspartyl protease family protein	-1.335
Zm00001d037155	-2.975	-3.748	Eukaryotic aspartyl protease family protein	-2.225
Zm00001d042276	-1.027	-1.315	Exostosin family protein	-1.096
Zm00001d035111	-3.482	-5.189	expansin 11	-3.985
Zm00001d047091	-2.429	-2.585	expansin B2	-1.162
Zm00001d049169	-5.179	-5.331	FAD-binding Berberine family protein	-4.493
Zm00001d020984	-1.345	-1.168	FAD-dependent oxidoreductase family protein	-1.673
Zm00001d048662	-1.508	-1.966	Family of unknown function (DUF716)	-1.427
Zm00001d019994	-1.605	-1.977	FASCICLIN-like arabinogalactan 2	-2.212
Zm00001d039010	-1.255	-1.052	FASCICLIN-like arabinogalactan 6	-1.319
Zm00001d002607	-1.752	-1.929	FASCICLIN-like arabinogalactan-protein 10	-1.775
Zm00001d027471	-2.71	-2.699	FASCICLIN-like arabinogalactan-protein 10	-2.729
Zm00001d009566	-1.375	-1.151	FASCICLIN-like arabinogalactan-protein 11	-1.479
Zm00001d043929	-1.734	-1.703	FASCICLIN-like arabinogalactan-protein 11	-1.651
Zm00001d020903	-1.312	-1.107	FASCICLIN-like arabinoogalactan 7	-1.7
Zm00001d006009	-1.837	-1.493	FASCICLIN-like arabinoogalactan 7	-2.246
Zm00001d051936	-1.357	-1.296	F-box family protein	-1.473
Zm00001d016306	-1.95	-2.711	F-box family protein with a domain of unknown function (DUF295)	-2.13
Zm00001d004007	-1.797	-2.054	FER-like regulator of iron uptake	-1.24
Zm00001d025547	-2.799	-3.296	fucosyltransferase 1	-1.598
Zm00001d018716	-1.607	-1.365	fucosyltransferase 8	-1.135
Zm00001d019221	-1.175	-1.401	Galactose oxidase/kelch repeat superfamily protein	-1.326
Zm00001d022428	-1.079	-1.139	galacturonosyltransferase 7	-1.064
Zm00001d025917	-1.992	-1.916	galacturonosyltransferase-like 4	-1.908
Zm00001d033822	-1.097	-1.269	gamma histone variant H2AX	-1.224
Zm00001d001852	-3.844	-4.586	GAST1 protein homolog 3	-3.245
Zm00001d041725	-1.329	-1.193	GATA type zinc finger transcription factor family protein	-1.708
Zm00001d019985	-1.045	-1.163	GDSL-like Lipase/Acylhydrolase superfamily protein	-2.01
Zm00001d045302	-1.138	-1.409	GDSL-like Lipase/Acylhydrolase superfamily protein	-1.351
Zm00001d016130	-1.315	-1.57	GDSL-like Lipase/Acylhydrolase superfamily protein	-1.652
Zm00001d038645	-2.429	-1.911	GDSL-like Lipase/Acylhydrolase superfamily protein	-1.025
Zm00001d014818	-2.425	-2.261	GDSL-like Lipase/Acylhydrolase superfamily protein	-2.512
Zm00001d014817	-1.975	-2.799	GDSL-like Lipase/Acylhydrolase superfamily protein	-1.753
Zm00001d014244	-2.235	-4.421	GDSL-like Lipase/Acylhydrolase superfamily protein	-3.038
Zm00001d031688	-1.095	-1.007	general regulatory factor 7	-1.096
Zm00001d003401	-1.552	-1.599	general regulatory factor 7	-1.61
Zm00001d002295	-6.409	-9.455	germin-like protein 2	-6.409
Zm00001d020238	-3.125	-2.819	Glucose-methanol-choline (GMC) oxidoreductase family protein	-2.475
Zm00001d018404	-1.497	-1.552	glucuronidase 1	-1.65
Zm00001d041511	-1.098	-1.592	glucuronidase 2	-1.402
Zm00001d034420	-1.638	-1.679	glutamate dehydrogenase 1	-2.002
Zm00001d025984	-1.422	-1.223	glutamate dehydrogenase 2	-1.27
Zm00001d020563	-1.147	-1.601	glutamate receptor 2.7	-1.008
Zm00001d050079	-1.83	-2.247	glutamine dumper 3	-2.683
Zm00001d032115	-1.932	-2.333	glutamine dumper 3	-2.413
Zm00001d015670	-1.589	-3.045	glutamine dumper 4	-1.767
Zm00001d022312	-1.224	-1.52	Glutathione S-transferase family protein	-1.598
Zm00001d024839	-1.105	-1.603	Glutathione S-transferase family protein	-1.969
Zm00001d027557	-1.078	-1.78	Glutathione S-transferase family protein	-3.484
Zm00001d048558	-1.36	-1.784	Glutathione S-transferase family protein	-1.962
Zm00001d029700	-1.828	-2.36	Glutathione S-transferase family protein	-2.143
Zm00001d029696	-2.208	-2.778	glutathione S-transferase TAU 18	-4.944
Zm00001d042104	-4.309	-5.446	glutathione S-transferase TAU 8	-3.353
Zm00001d041596	-4.269	-4.528	glycerol-3-phosphate acyltransferase 1	-4.249
Zm00001d000117	-1.162	-1.289	Glycosyl hydrolase superfamily protein	-1.377
Zm00001d030361	-2.086	-1.734	Glycosyl hydrolase superfamily protein	-2.354
Zm00001d038049	-2.49	-3.964	Glycosyl hydrolase superfamily protein	-1.789
Zm00001d025943	-6.114	-6.13	Glycosyl hydrolases family 32 protein	-5.795
Zm00001d014722	-1.363	-1.678	Glycosyltransferase family 61 protein	-1.517
Zm00001d009328	-1.754	-2.569	Glycosyltransferase family 61 protein	-1.922
Zm00001d025901	-1.996	-1.762	GRAM domain-containing protein / ABA-responsive protein-related	-1.748
Zm00001d009646	-7.695	-8.239	GRAS family transcription factor family protein	-5.442
Zm00001d005658	-1.698	-1.326	Haloacid dehalogenase-like hydrolase (HAD) superfamily protein	-2.147
Zm00001d047110	-2.139	-1.832	Haloacid dehalogenase-like hydrolase (HAD) superfamily protein	-2.165
Zm00001d020272	-2.752	-3.276	Haloacid dehalogenase-like hydrolase (HAD) superfamily protein	-2.684
Zm00001d017502	-3.046	-3.36	Haloacid dehalogenase-like hydrolase (HAD) superfamily protein	-2.607
Zm00001d007205	-2.026	-1.809	Heat shock protein DnaJ with tetratricopeptide repeat	-1.865
Zm00001d022474	-1.327	-1.461	Heavy metal transport/detoxification superfamily protein	-1.209
Zm00001d029126	-1.46	-1.557	Heavy metal transport/detoxification superfamily protein	-1.326
Zm00001d048411	-1.886	-1.889	Heavy metal transport/detoxification superfamily protein	-2.459
Zm00001d001915	-1.356	-2.144	Heavy metal transport/detoxification superfamily protein	-1.339
Zm00001d037689	-2.849	-2.833	hexokinase 2	-2.78
Zm00001d031777	-1.161	-1.129	Histone H3 K4-specific methyltransferase SET7/9 family protein	-1.153
Zm00001d003889	-1.046	-1.523	Homeodomain-like superfamily protein	-1.033
Zm00001d021634	-3.181	-2.855	HSP20-like chaperones superfamily protein	-3.525
Zm00001d009960	-1.029	-1.087	HXXXD-type acyl-transferase family protein	-1.151
Zm00001d035064	-1.044	-1.4	HXXXD-type acyl-transferase family protein	-1.204
Zm00001d052042	-1.755	-1.991	HXXXD-type acyl-transferase family protein	-2.871
Zm00001d032527	-1.822	-2.274	HXXXD-type acyl-transferase family protein	-2.25
Zm00001d042826	-1.394	-2.576	HXXXD-type acyl-transferase family protein	-1.266
Zm00001d008756	-2.74	-3.521	HXXXD-type acyl-transferase family protein	-2.964
Zm00001d039615	-2.561	-4.891	HXXXD-type acyl-transferase family protein	-5.353
Zm00001d036839	-1.365	-1.464	Hypoxia-responsive family protein	-1.153
Zm00001d014562	-1.697	-1.924	IAA-leucine resistant (ILR)-like gene 6	-1.678
Zm00001d052480	-1.237	-1.323	indole-3-acetate beta-D-glucosyltransferase	-1.311
Zm00001d027585	-1.006	-1.039	inhibitor/interactor with cyclin-dependent kinase	-1.063
Zm00001d037165	-1.741	-1.727	Integrase-type DNA-binding superfamily protein	-1.582
Zm00001d027925	-2.044	-2.252	Integrase-type DNA-binding superfamily protein	-1.37
Zm00001d044950	-2.072	-2.634	Integrase-type DNA-binding superfamily protein	-2.202
Zm00001d027901	-1.46	-1.886	jasmonate-zim-domain protein 1	-1.891
Zm00001d020614	-2.191	-3.171	jasmonate-zim-domain protein 1	-2.934
Zm00001d021674	-1.158	-1.538	Late embryogenesis abundant (LEA) hydroxyproline-rich glycoprotein family	-2.109
Zm00001d044700	-1.159	-1.575	Late embryogenesis abundant (LEA) hydroxyproline-rich glycoprotein family	-1.337
Zm00001d041984	-1.942	-2.606	late embryogenesis abundant protein-related / LEA protein-related	-1.635
Zm00001d041985	-1.973	-2.828	late embryogenesis abundant protein-related / LEA protein-related	-1.422
Zm00001d014555	-1.758	-2.361	Leucine-rich receptor-like protein kinase family protein	-1.09
Zm00001d002287	-3.616	-3.764	Leucine-rich receptor-like protein kinase family protein	-2.775
Zm00001d009952	-1.407	-1.24	Leucine-rich repeat (LRR) family protein	-1.192
Zm00001d007830	-1.138	-1.272	Leucine-rich repeat (LRR) family protein	-1.048
Zm00001d013080	-1.031	-1.561	Leucine-rich repeat (LRR) family protein	-1.126
Zm00001d038522	-1.881	-2.449	Leucine-rich repeat protein kinase family protein	-1.662
Zm00001d041773	-2.327	-2.456	Leucine-rich repeat protein kinase family protein	-2.253
Zm00001d045785	-1.92	-3.028	Leucine-rich repeat protein kinase family protein	-2.063
Zm00001d037666	-1.103	-1.247	Leucine-rich repeat transmembrane protein kinase	-1.424
Zm00001d002313	-1.184	-1.492	Leucine-rich repeat transmembrane protein kinase	-1.392
Zm00001d026306	-1.811	-2.493	Leucine-rich repeat transmembrane protein kinase	-2.21
Zm00001d021784	-2.198	-2.022	light-harvesting chlorophyll B-binding protein 3	-2.017
Zm00001d038908	-2.14	-2.636	lipid phosphate phosphatase 2	-1.325
Zm00001d053675	-1.808	-2.05	lipoxygenase 2	-1.828
Zm00001d040004	-6.569	-6.106	LOB domain-containing protein 41	-2.838
Zm00001d038334	-1.993	-1.876	Major facilitator superfamily protein	-2.055
Zm00001d017714	-1.473	-2.014	Major facilitator superfamily protein	-1.26
Zm00001d035558	-8.066	-11.099	Mannose-binding lectin superfamily protein	-8.066
Zm00001d009494	-1.13	-1.063	MATE efflux family protein	-1.093
Zm00001d027982	-1.354	-1.301	MATE efflux family protein	-1.198
Zm00001d013810	-1.246	-1.693	MATE efflux family protein	-1.122
Zm00001d006171	-3.378	-3.216	MATE efflux family protein	-2.504
Zm00001d044771	-1.352	-1.634	matrix metalloproteinase	-1.448
Zm00001d010675	-2.289	-2.429	metacaspase 5	-2.473
Zm00001d042382	-2.182	-2.109	Metal-dependent protein hydrolase	-1.938
Zm00001d000294	-1.821	-2.448	methionine gamma-lyase	-2.063
Zm00001d012603	-1.597	-1.331	methyl esterase 1	-1.645
Zm00001d047124	-4.404	-4.215	Methylenetetrahydrofolate reductase family protein	-6.545
Zm00001d029853	-5.412	-5.527	Methylenetetrahydrofolate reductase family protein	-6.658
Zm00001d044662	-5.833	-5.886	mini zinc finger 2	-7.411
Zm00001d011656	-1.029	-2.08	mitogen-activated protein kinase kinase kinase 15	-2.053
Zm00001d012898	-1.795	-1.562	Mono-/di-acylglycerol lipase, N-terminal;Lipase, class 3	-1.749
Zm00001d016842	-1.633	-2.814	monooxygenase 1	-1.201
Zm00001d035605	-3.713	-3.744	myb domain protein 48	-3.785
Zm00001d043729	-1.49	-1.683	myb domain protein 61	-2.372
Zm00001d053220	-2.255	-2.887	myb domain protein 7	-1.787
Zm00001d043837	-2.467	-3.284	myb domain protein 84	-2.108
Zm00001d039700	-8.658	-9.124	myb domain protein 86	-8.611
Zm00001d046234	-6.26	-6.152	myo-inositol oxygenase 1	-5.701
Zm00001d013276	-1.14	-1.253	myosin-like protein XIF	-1.501
Zm00001d025402	-1.121	-1.385	N/A	-1.992
Zm00001d031167	-1.471	-1.909	N/A	-1.287
Zm00001d017147	-2.048	-1.675	N/A	-2.283
Zm00001d028129	-2.602	-1.726	N/A	-1.184
REL-sp|Q8LPF3|PME68_ARATH:	-1.189	-1.015	N/A	-1.574
Zm00001d013178	-1.236	-1.022	N/A	-1.356
MSTRG.24078	-1.224	-1.041	N/A	-1.316
Zm00001d044674	-1.154	-1.044	N/A	-1.089
ZeamMp073	-1.111	-1.055	N/A	-1.704
Zm00001d013875	-1.164	-1.084	N/A	-1.222
Zm00001d042599	-1.207	-1.092	N/A	-1.253
Zm00001d040027	-1.874	-1.125	N/A	-1.611
Zm00001d038626	-1.12	-1.129	N/A	-1.455
Zm00001d026295	-1.176	-1.132	N/A	-1.149
Zm00001d037197	-1.054	-1.21	N/A	-1.61
MSTRG.11345	-1.388	-1.214	N/A	-1.203
Zm00001d052985	-1.095	-1.243	N/A	-1.073
Zm00001d015918	-1.325	-1.25	N/A	-1.484
Zm00001d043703	-1.246	-1.256	N/A	-1.274
Zm00001d044254	-1.021	-1.264	N/A	-1.63
Zm00001d053352	-1.045	-1.268	N/A	-1.899
MSTRG.11346	-1.365	-1.271	N/A	-1.05
Zm00001d009525	-1.283	-1.359	N/A	-3.126
Zm00001d040028	-1.638	-1.372	N/A	-1.296
Zm00001d017535	-1.588	-1.373	N/A	-1.776
Zm00001d005885	-1.12	-1.373	N/A	-1.37
MSTRG.3610	-1.389	-1.412	N/A	-1.533
Zm00001d041743	-1.577	-1.436	N/A	-1.354
MSTRG.24075	-1.23	-1.449	N/A	-2.193
Zm00001d042270	-2.095	-1.471	N/A	-1.95
Zm00001d044270	-1.769	-1.481	N/A	-1.033
Zm00001d017968	-1.007	-1.498	N/A	-1.385
Zm00001d008453	-2.025	-1.5	N/A	-1.374
Zm00001d026406	-1.48	-1.507	N/A	-1.637
Zm00001d017814	-1.51	-1.526	N/A	-1.828
Zm00001d021816	-1.636	-1.533	N/A	-2.066
MSTRG.4232	-1.411	-1.533	N/A	-1.647
Zm00001d020042	-1.706	-1.543	N/A	-1.986
Zm00001d049120	-1.294	-1.547	N/A	-1.167
MSTRG.3315	-1.371	-1.553	N/A	-1.339
MSTRG.46255	-1.372	-1.555	N/A	-1.614
Zm00001d039297	-1.637	-1.579	N/A	-1.763
Zm00001d028917	-1.856	-1.59	N/A	-1.934
MSTRG.40730	-1.174	-1.611	N/A	-1.964
Zm00001d047478	-1.415	-1.623	N/A	-1.987
Zm00001d023477	-1.202	-1.629	N/A	-1.544
Zm00001d003508	-1.208	-1.644	N/A	-1.067
Zm00001d043830	-1.463	-1.685	N/A	-1.7
Zm00001d034673	-1.535	-1.706	N/A	-1.646
Zm00001d037743	-1.318	-1.73	N/A	-1.649
Zm00001d006881	-1.429	-1.757	N/A	-1.434
Zm00001d041518	-1.449	-1.82	N/A	-1.991
Zm00001d033402	-1.078	-1.857	N/A	-1.294
Zm00001d045210	-1.111	-1.894	N/A	-2.064
Zm00001d026509	-2.125	-1.91	N/A	-2.101
Zm00001d045931	-1.159	-1.915	N/A	-2.864
Zm00001d008501	-1.332	-1.95	N/A	-1.53
Zm00001d008523	-2.13	-1.97	N/A	-2.207
Zm00001d016756	-1.641	-1.995	N/A	-2.174
REL-sp|Q9MB95|1A11_PRUMU:	-1.323	-2.033	N/A	-2.743
Zm00001d046999	-1.511	-2.034	N/A	-1.971
MSTRG.24894	-1.755	-2.037	N/A	-2.4
Zm00001d048728	-1.787	-2.06	N/A	-1.713
Zm00001d016271	-1.518	-2.074	N/A	-2.373
Zm00001d037631	-2.055	-2.204	N/A	-1.942
Zm00001d031677	-1.966	-2.27	N/A	-1.847
Zm00001d018006	-1.44	-2.308	N/A	-1.648
Zm00001d053410	-1.101	-2.317	N/A	-1.372
Zm00001d004729	-1.738	-2.329	N/A	-1.82
Zm00001d018117	-2.231	-2.375	N/A	-2.469
MSTRG.39347	-1.199	-2.438	N/A	-2.628
MSTRG.21045	-2.252	-2.516	N/A	-2.283
Zm00001d004730	-2.028	-2.634	N/A	-2.598
Zm00001d048727	-2.39	-2.728	N/A	-1.926
Zm00001d032447	-2.519	-2.744	N/A	-4.994
Zm00001d032947	-2.704	-2.767	N/A	-2.359
Zm00001d009487	-2.563	-2.834	N/A	-2.435
Zm00001d011434	-1.658	-2.89	N/A	-1.694
Zm00001d002500	-2.976	-2.891	N/A	-2.168
Zm00001d052122	-3.228	-2.922	N/A	-2.316
Zm00001d029172	-2.385	-3.04	N/A	-1.889
Zm00001d053445	-3.537	-3.199	N/A	-4.329
Zm00001d016083	-2.004	-3.216	N/A	-2.946
Zm00001d004728	-2.696	-3.321	N/A	-2.352
Zm00001d034382	-2.189	-3.431	N/A	-1.365
Zm00001d043479	-3.118	-3.439	N/A	-2.514
Zm00001d012091	-2.636	-3.548	N/A	-2.484
Zm00001d022032	-1.768	-3.608	N/A	-1.641
Zm00001d002133	-4.278	-4.041	N/A	-5.122
Zm00001d038382	-3.649	-4.048	N/A	-4.237
Zm00001d004721	-3.697	-4.093	N/A	-2.919
Zm00001d043702	-4.335	-4.259	N/A	-5.154
Zm00001d039648	-3.725	-4.297	N/A	-2.915
Zm00001d005879	-3.329	-4.367	N/A	-4.309
Zm00001d005657	-4.435	-4.884	N/A	-4.359
Zm00001d003865	-4.287	-4.998	N/A	-3.971
Zm00001d009957	-4.732	-5.01	N/A	-4.11
Zm00001d004725	-4.368	-5.129	N/A	-4.705
Zm00001d042307	-5.24	-5.544	N/A	-5.428
Zm00001d041640	-3.12	-5.731	N/A	-2.348
Zm00001d012090	-4.501	-7.974	N/A	-3.161
Zm00001d032535	-10.593	-10.758	N/A	-10.593
Zm00001d012527	-1.806	-2.089	NAC (No Apical Meristem) domain transcriptional regulator superfamily protein	-2.601
Zm00001d041791	-1.897	-2.769	NAC (No Apical Meristem) domain transcriptional regulator superfamily protein	-2.635
Zm00001d035084	-3.02	-3.252	NAC (No Apical Meristem) domain transcriptional regulator superfamily protein	-4.509
Zm00001d025861	-2.667	-3.275	NAC domain containing protein 74	-2.589
Zm00001d034731	-1.02	-1.119	NAD(P)-binding Rossmann-fold superfamily protein	-1.294
Zm00001d003841	-1.143	-2.662	NAD(P)-binding Rossmann-fold superfamily protein	-1.648
Zm00001d020958	-2.981	-3.686	NAD(P)-binding Rossmann-fold superfamily protein	-4.101
Zm00001d007700	-3.68	-1.413	NAD(P)-binding Rossmann-fold superfamily protein	-1.584
Zm00001d049597	-1.142	-1.174	NAD(P)H dehydrogenase B2	-1.362
Zm00001d031666	-3.267	-4.375	NAD(P)-linked oxidoreductase superfamily protein	-5.023
Zm00001d006365	-2.64	-4.279	NAD(P)-linked oxidoreductase superfamily protein	-4.069
Zm00001d047441	-1.545	-2.847	NADPH:quinone oxidoreductase	-3.543
Zm00001d052393	-1.333	-1.453	NB-ARC domain-containing disease resistance protein	-1.227
Zm00001d023923	-1.408	-1.697	NB-ARC domain-containing disease resistance protein	-1.394
Zm00001d003048	-1.213	-1.941	NB-ARC domain-containing disease resistance protein	-1.024
Zm00001d049121	-1.788	-2.208	NB-ARC domain-containing disease resistance protein	-1.885
Zm00001d051759	-1.435	-1.271	NHL domain-containing protein	-1.283
Zm00001d014976	-3.95	-4.923	nitrate transporter 2.4	-2.861
Zm00001d035714	-2.097	-1.666	nodulin MtN21 /EamA-like transporter family protein	-2.319
Zm00001d033284	-3.307	-3.249	nodulin MtN21 /EamA-like transporter family protein	-2.245
Zm00001d018195	-2.962	-4.809	nodulin MtN21 /EamA-like transporter family protein	-4.361
Zm00001d009071	-1.414	-1.342	Nodulin MtN3 family protein	-1.786
Zm00001d000222	-1.304	-1.411	Nodulin MtN3 family protein	-1.039
Zm00001d004021	-1.018	-1.38	non-photochemical quenching 1	-1.16
Zm00001d052041	-2.134	-2.342	Nucleotide-diphospho-sugar transferases superfamily protein	-2.887
Zm00001d050600	-3.379	-3.211	nudix hydrolase homolog 12	-4.069
Zm00001d052667	-2.193	-2.818	nudix hydrolase homolog 13	-2.443
Zm00001d002759	-1.322	-1.521	nudix hydrolase homolog 8	-1.143
Zm00001d021400	-1.126	-1.195	Octicosapeptide/Phox/Bem1p (PB1) domain-containing protein / tetratricopeptide repeat (TPR)-containing protein	-1.262
Zm00001d021746	-4.599	-4.553	Octicosapeptide/Phox/Bem1p family protein	-4.218
Zm00001d038373	-1.45	-1.344	O-fucosyltransferase family protein	-1.016
Zm00001d004763	-1.911	-1.885	O-Glycosyl hydrolases family 17 protein	-2.018
Zm00001d007896	-1.387	-2.39	O-Glycosyl hydrolases family 17 protein	-1.53
Zm00001d010736	-1.543	-1.322	O-methyltransferase family protein	-1.609
Zm00001d049265	-1.188	-2.227	O-methyltransferase family protein	-1.154
Zm00001d032083	-1.531	-2.415	O-methyltransferase family protein	-1.716
Zm00001d029359	-2.256	-2.436	O-methyltransferase family protein	-2.136
Zm00001d038700	-1.936	-2.618	O-methyltransferase family protein	-2.173
Zm00001d029356	-3.241	-3.362	O-methyltransferase family protein	-3.195
Zm00001d004921	-3.911	-4.222	O-methyltransferase family protein	-3.661
Zm00001d053156	-6.211	-6.618	O-methyltransferase family protein	-3.636
Zm00001d021781	-2.493	-2.512	organic cation/carnitine transporter 2	-2.368
Zm00001d022226	-1.14	-1.067	origin recognition complex protein 6	-1.057
Zm00001d026661	-1.228	-1.967	ovate family protein 13	-2.242
Zm00001d026012	-1.621	-1.89	oxidative stress 3	-1.252
Zm00001d017622	-4.802	-4.746	oxidative stress 3	-2.624
Zm00001d018788	-2.576	-1.984	patatin-like protein 6	-2.301
Zm00001d007448	-2.049	-1.847	pathogenesis-related gene 1	-2.809
Zm00001d010793	-2.898	-2.801	Pectin lyase-like superfamily protein	-2.499
Zm00001d030158	-1.412	-1.302	peptide transporter 2	-1.256
Zm00001d017531	-1.421	-1.497	permease, cytosine/purines, uracil, thiamine, allantoin family protein	-1.533
Zm00001d014603	-1.837	-2.198	Peroxidase family protein	-1.95
Zm00001d040702	-1.009	-1.381	Peroxidase superfamily protein	-1.049
Zm00001d024735	-1.653	-1.812	Peroxidase superfamily protein	-1.371
Zm00001d009138	-1.802	-1.859	Peroxidase superfamily protein	-1.739
Zm00001d024738	-1.64	-2.418	Peroxidase superfamily protein	-1.072
Zm00001d040581	-2.471	-2.471	Peroxidase superfamily protein	-2.402
Zm00001d041827	-3.623	-3.137	Peroxidase superfamily protein	-3.468
Zm00001d002898	-3.216	-3.144	Peroxidase superfamily protein	-1.507
Zm00001d045846	-2.85	-3.524	Peroxidase superfamily protein	-1.846
Zm00001d035055	-7.442	-8.952	Peroxidase superfamily protein	-7.442
Zm00001d016185	-1.081	-1.029	Peroxidase superfamily protein	-1.418
Zm00001d022456	-1.359	-1.677	Peroxidase superfamily protein	-1.624
Zm00001d022458	-1.725	-1.749	Peroxidase superfamily protein	-1.952
Zm00001d053839	-2.015	-2.143	Peroxidase superfamily protein	-1.902
Zm00001d052335	-1.937	-2.331	Peroxidase superfamily protein	-2.272
Zm00001d007160	-2.332	-3.37	Peroxidase superfamily protein	-2.414
Zm00001d046186	-4.41	-4.437	Peroxidase superfamily protein	-2.534
Zm00001d022457	-3.265	-5.95	Peroxidase superfamily protein	-5.043
Zm00001d032854	-6.974	-9.42	Peroxidase superfamily protein	-6.974
Zm00001d033091	-1.559	-1.794	Peroxisomal membrane 22 kDa (Mpv17/PMP22) family protein	-1.11
Zm00001d027361	-2.258	-2.403	phloem protein 2-A13	-1.923
Zm00001d027700	-2.034	-2.353	phosphate transporter 1;7	-3.673
Zm00001d018107	-1.443	-1.614	Phosphate-responsive 1 family protein	-1.179
Zm00001d013046	-1.864	-2.098	Phosphatidic acid phosphatase (PAP2) family protein	-2.149
Zm00001d047893	-1.734	-1.955	phosphoenolpyruvate carboxykinase 1	-1.258
Zm00001d024796	-1.213	-1.391	Phosphoglycerate mutase family protein	-1.225
Zm00001d031815	-2.25	-2.147	phospholipase A 2A	-1.853
Zm00001d050470	-1.251	-1.375	phospholipase D beta 1	-1.538
Zm00001d045558	-2.236	-2.698	Phosphorylase superfamily protein	-2.266
Zm00001d036535	-6.032	-5.718	photosystem II subunit O-2	-6.493
Zm00001d017079	-1.084	-1.175	Phototropic-responsive NPH3 family protein	-1.357
Zm00001d039639	-1.117	-1.179	Phototropic-responsive NPH3 family protein	-1.119
Zm00001d039513	-1.547	-2.192	phytochrome-associated protein 1	-1.477
Zm00001d023228	-3.094	-2.787	PLAC8 family protein	-3.784
Zm00001d034745	-1.355	-1.752	PLANT CADMIUM RESISTANCE 2	-1.002
Zm00001d025807	-1.081	-1.343	Plant protein of unknown function (DUF247)	-1.022
Zm00001d045130	-2.047	-2.614	Plant protein of unknown function (DUF247)	-3.051
Zm00001d024489	-5.66	-7.75	Plant protein of unknown function (DUF247)	-8.303
Zm00001d021900	-1.717	-2.188	Plant protein of unknown function (DUF946)	-1.87
Zm00001d019563	-1.208	-1.424	plasma membrane intrinsic protein 2	-1.016
Zm00001d015921	-1.68	-1.566	plasma-membrane associated cation-binding protein 1	-1.614
Zm00001d009010	-2.172	-2.218	plasma-membrane associated cation-binding protein 1	-1.927
Zm00001d047293	-1.39	-1.053	plasmodesmata callose-binding protein 4	-1.573
Zm00001d041204	-2.515	-2.614	PLAT/LH2 domain-containing lipoxygenase family protein	-4.168
Zm00001d006231	-1.437	-1.376	PLC-like phosphodiesterases superfamily protein	-1.221
Zm00001d034940	-1.092	-1.174	pleiotropic drug resistance 11	-1.089
Zm00001d044442	-2.248	-2.582	pleiotropic drug resistance 12	-2.552
Zm00001d009702	-1.251	-1.102	P-loop containing nucleoside triphosphate hydrolases superfamily protein	-1.232
Zm00001d034501	-2.002	-2.017	P-loop containing nucleoside triphosphate hydrolases superfamily protein	-1.421
Zm00001d013834	-1.45	-2.128	P-loop containing nucleoside triphosphate hydrolases superfamily protein	-1.833
Zm00001d007157	-2.132	-3.243	Pollen Ole e 1 allergen and extensin family protein	-2.622
Zm00001d038436	-1.818	-1.44	Polyketide cyclase/dehydrase and lipid transport superfamily protein	-2.156
Zm00001d028793	-4.306	-4.059	Polyketide cyclase/dehydrase and lipid transport superfamily protein	-4.667
Zm00001d047705	-4.223	-4.129	Polyketide cyclase/dehydrase and lipid transport superfamily protein	-4.198
Zm00001d001774	-1.336	-2.77	Polynucleotidyl transferase, ribonuclease H-like superfamily protein	-1.607
Zm00001d026657	-2.412	-3.581	Polynucleotidyl transferase, ribonuclease H-like superfamily protein	-2.794
Zm00001d023941	-1.981	-1.762	polyol/monosaccharide transporter 5	-1.357
Zm00001d049521	-1.302	-1.135	Predicted AT-hook DNA-binding family protein	-1.313
Zm00001d011185	-1.434	-1.314	Preprotein translocase Sec, Sec61-beta subunit protein	-1.467
Zm00001d043523	-1.63	-1.583	profilin 5	-1.903
Zm00001d043480	-1.112	-1.58	proline extensin-like receptor kinase 1	-1.017
Zm00001d030314	-2.755	-2.515	proline-rich protein 2	-3.92
Zm00001d046561	-1.29	-1.046	Protein kinase superfamily protein	-1.476
Zm00001d029143	-1.418	-1.278	Protein kinase superfamily protein	-1.529
Zm00001d025959	-1.579	-1.696	Protein kinase superfamily protein	-1.674
Zm00001d039920	-1.542	-2.079	Protein kinase superfamily protein	-1.401
Zm00001d011912	-2.436	-2.182	Protein kinase superfamily protein	-2.834
Zm00001d026126	-1.696	-2.182	Protein kinase superfamily protein	-1.358
Zm00001d002283	-2.054	-2.382	Protein kinase superfamily protein	-2.044
Zm00001d020429	-1.492	-2.391	Protein kinase superfamily protein	-1.678
Zm00001d011626	-1.877	-2.559	Protein kinase superfamily protein	-1.493
Zm00001d040210	-1.452	-2.39	Protein of unknown function (DUF 3339)	-1.402
Zm00001d036246	-1.074	-1.323	Protein of unknown function (DUF1191)	-1.522
Zm00001d038325	-4.438	-4.771	Protein of unknown function (DUF1218)	-2.224
Zm00001d029566	-1.229	-1.386	Protein of unknown function (DUF1336)	-1.649
Zm00001d036417	-1.306	-1.346	Protein of unknown function (DUF1640)	-1.304
Zm00001d011331	-1.268	-1.475	Protein of unknown function (DUF1644)	-1.382
Zm00001d044100	-1.374	-1.542	Protein of unknown function (DUF1645)	-1.181
Zm00001d043444	-1.752	-2.183	Protein of unknown function (DUF506)	-1.389
Zm00001d043318	-2.644	-2.712	Protein of unknown function (DUF567)	-3.269
Zm00001d026029	-1.2	-1.03	Protein of unknown function (DUF581)	-1.051
Zm00001d002521	-1.955	-2.04	Protein of unknown function (DUF581)	-2.189
Zm00001d050285	-2.912	-3.185	Protein of unknown function (DUF581)	-4.635
Zm00001d052937	-2.198	-1.839	Protein of unknown function (DUF594)	-2.036
Zm00001d052939	-7.693	-7.774	Protein of unknown function (DUF594)	-7.376
Zm00001d010596	-2.003	-1.888	Protein of unknown function (DUF640)	-1.877
Zm00001d034995	-1.349	-1.997	Protein of unknown function (DUF679)	-1
Zm00001d032285	-2.094	-1.966	Protein of unknown function (DUF761)	-2.092
Zm00001d032287	-3.278	-3.53	Protein of unknown function (DUF761)	-4.814
Zm00001d013958	-1.724	-1.58	Protein of unknown function (DUF789)	-1.723
Zm00001d006489	-1.126	-1.055	Protein of unknown function, DUF584	-1.487
Zm00001d007503	-1.268	-1.757	Protein of unknown function, DUF593	-1.374
Zm00001d004513	-1.248	-1.252	Pseudouridine synthase/archaeosine transglycosylase-like family protein	-1.308
Zm00001d031657	-1.605	-1.715	purple acid phosphatase 27	-1.226
Zm00001d016294	-1.285	-1.175	PYR1-like 2	-1.096
Zm00001d029083	-1.669	-2.73	PYRIMIDINE 4	-1.859
Zm00001d010171	-1.706	-1.689	pyrophosphorylase 3	-1.299
Zm00001d038163	-4.837	-2.934	pyruvate orthophosphate dikinase	-2.972
Zm00001d037480	-1.838	-1.642	Raffinose synthase family protein	-1.732
Zm00001d003280	-2.375	-2.656	Raffinose synthase family protein	-3.077
Zm00001d009247	-1.304	-1.395	ralf-like 33	-1.52
Zm00001d043478	-1.698	-1.644	receptor like protein 51	-1.397
Zm00001d048053	-1.176	-1.137	receptor-like kinase 1	-1.056
Zm00001d006534	-2.017	-2.071	Receptor-like protein kinase-related family protein	-1.55
Zm00001d043782	-2.85	-2.906	related to ABI3/VP1 2	-2.249
Zm00001d044857	-1.169	-1.102	related to AP2 4	-1.157
Zm00001d027330	-2.387	-2.629	Remorin family protein	-2.806
Zm00001d043386	-4.249	-4.435	RHO guanyl-nucleotide exchange factor 11	-3.707
Zm00001d002632	-1.115	-1.446	RHOMBOID-like 1	-1.066
Zm00001d022228	-1.155	-1.528	ribonuclease 3	-1.264
Zm00001d018393	-1.128	-1.16	RING/U-box superfamily protein	-1.765
Zm00001d050798	-2.495	-3.602	RING/U-box superfamily protein	-5.019
Zm00001d016697	-1.156	-1.054	RmlC-like cupins superfamily protein	-1.132
Zm00001d041609	-1.266	-1.508	RNA polymerases M/15 Kd subunit	-1.246
Zm00001d052212	-1.3	-1.278	RNA-binding (RRM/RBD/RNP motifs) family protein	-1.182
Zm00001d046716	-1.258	-1.426	RNA-binding (RRM/RBD/RNP motifs) family protein	-1.179
Zm00001d018103	-1.515	-1.444	RNA-binding (RRM/RBD/RNP motifs) family protein	-1.335
Zm00001d047753	-2.034	-1.724	RNA-binding (RRM/RBD/RNP motifs) family protein	-1.851
Zm00001d037209	-1.822	-1.936	RNA-binding (RRM/RBD/RNP motifs) family protein	-1.801
Zm00001d005072	-2.564	-2.937	RNI-like superfamily protein	-2.029
Zm00001d034836	-1.264	-1.984	ROP-interactive CRIB motif-containing protein 4	-1.752
Zm00001d037623	-1.521	-1.724	ROTUNDIFOLIA like 12	-1.736
Zm00001d009961	-1.7	-1.807	ROTUNDIFOLIA like 12	-2.069
Zm00001d039695	-1.445	-2.001	S-adenosyl-L-methionine-dependent methyltransferases superfamily protein	-1.237
Zm00001d044762	-5.636	-4.891	S-adenosyl-L-methionine-dependent methyltransferases superfamily protein	-5.236
Zm00001d031146	-2.74	-3.875	SAUR-like auxin-responsive protein family	-4.563
Zm00001d013571	-1.323	-1.297	SBP (S-ribonuclease binding protein) family protein	-1.259
Zm00001d042664	-1.108	-1.168	SEC14 cytosolic factor family protein / phosphoglyceride transfer family protein	-1.037
Zm00001d012254	-1.076	-1.181	SEC14 cytosolic factor family protein / phosphoglyceride transfer family protein	-1.175
Zm00001d046538	-1.294	-1.297	Sec14p-like phosphatidylinositol transfer family protein	-1.597
Zm00001d046995	-2.261	-2.264	Sec14p-like phosphatidylinositol transfer family protein	-2.301
Zm00001d031300	-1.452	-1.494	seed imbibition 1	-1.469
Zm00001d031303	-1.407	-1.496	seed imbibition 1	-1.583
Zm00001d003277	-3.446	-3.335	seed imbibition 2	-3.608
Zm00001d013261	-9.512	-8.211	senescence-associated gene 12	-7.653
Zm00001d016588	-1.19	-1.291	senescence-related gene 3	-2.001
Zm00001d028154	-1.008	-1.369	serine acetyltransferase 2;1	-2.981
Zm00001d042975	-1.358	-1.389	serine carboxypeptidase-like 26	-1.741
Zm00001d007073	-1.705	-1.863	serine carboxypeptidase-like 40	-1.429
Zm00001d022374	-1.993	-2.16	serine carboxypeptidase-like 40	-1.203
Zm00001d043136	-1.146	-1.134	serine protease inhibitor, Kazal-type family protein	-1.485
Zm00001d035684	-2.875	-2.314	Serine protease inhibitor, potato inhibitor I-type family protein	-1.602
Zm00001d011080	-4.324	-4.854	Serine protease inhibitor, potato inhibitor I-type family protein	-2.482
Zm00001d002128	-1.183	-1.177	shikimate kinase 1	-1.957
Zm00001d041653	-1.756	-2.274	SLAC1 homologue 3	-2.189
Zm00001d039173	-1.738	-2.513	SPFH/Band 7/PHB domain-containing membrane-associated protein family	-1.55
Zm00001d012015	-1.204	-1.305	Squamosa promoter-binding protein-like (SBP domain) transcription factor family protein	-1.001
Zm00001d023395	-1.926	-1.446	Stress responsive A/B Barrel Domain	-1.716
Zm00001d024821	-2.046	-2.613	Sucrose-6F-phosphate phosphohydrolase family protein	-2.479
Zm00001d018627	-1.919	-2.061	sugar transporter 1	-1.575
Zm00001d005594	-1.361	-1.215	sugar transporter 14	-1.064
Zm00001d002038	-3.026	-2.164	sulfate transporter 91	-2.865
Zm00001d054093	-2.374	-3.045	sulfurtransferase 18	-1.807
Zm00001d053020	-1.461	-1.443	TCP family transcription factor	-1.194
Zm00001d018045	-1.435	-1.333	TEOSINTE BRANCHED, cycloidea and PCF (TCP) 14	-1.336
Zm00001d052256	-1.082	-1.095	TEOSINTE BRANCHED, cycloidea and PCF (TCP) 14	-1.413
Zm00001d004509	-1.914	-1.755	Terpenoid cyclases/Protein prenyltransferases superfamily protein	-2.2
Zm00001d011769	-1.011	-1.105	tetraspanin6	-1.149
Zm00001d028399	-1.036	-1.214	thaumatin superfamily protein	-1.05
Zm00001d022637	-3.243	-5.228	thaumatin superfamily protein	-2.568
Zm00001d052034	-2.708	-3.512	thioredoxin 2	-1.609
Zm00001d003058	-1.109	-1.333	threonine aldolase 1	-1.293
Zm00001d022139	-1.647	-1.802	TIFY domain/Divergent CCT motif family protein	-2.069
Zm00001d048520	-3.514	-3.304	tonoplast intrinsic protein 1;3	-2.634
Zm00001d025375	-1.792	-2.055	Transducin/WD40 repeat-like superfamily protein	-2.375
Zm00001d013786	-1.618	-1.981	transferases;folic acid binding	-1.223
Zm00001d018704	-6.75	-7.307	Transmembrane amino acid transporter family protein	-5.08
Zm00001d018342	-2.067	-2.176	trehalose phosphatase/synthase 11	-1.182
Zm00001d012748	-1.205	-1.36	trehalose-phosphatase/synthase 7	-1.079
Zm00001d012983	-1.107	-1.905	TRICHOME BIREFRINGENCE-LIKE 34	-2.126
Zm00001d021891	-1.28	-1.263	tubulin alpha-5	-1.163
Zm00001d006651	-1.521	-1.523	tubulin alpha-5	-1.474
Zm00001d034022	-1.97	-1.98	tubulin beta-5 chain	-1.968
Zm00001d043998	-1.184	-1.508	ubiquitin conjugating enzyme 9	-1.171
Zm00001d031257	-1.826	-2.309	uclacyanin 1	-1.747
Zm00001d021026	-2.615	-2.445	UDP-D-glucuronate 4-epimerase 6	-1.703
Zm00001d007486	-1.421	-2.017	UDP-glucosyl transferase 72B3	-1.803
Zm00001d039642	-3.291	-3.346	UDP-glucosyl transferase 73D1	-3.736
Zm00001d006683	-1.588	-2.149	UDP-glucosyl transferase 78D2	-1.756
Zm00001d032222	-1.876	-1.865	UDP-glucosyl transferase 85A2	-1.697
Zm00001d016896	-1.624	-1.933	UDP-glucosyl transferase 85A3	-1.711
Zm00001d038764	-1.141	-1.901	UDP-glucosyl transferase 88A1	-1.849
Zm00001d020396	-1.795	-2.272	UDP-Glycosyltransferase / trehalose-phosphatase family protein	-1.238
Zm00001d053514	-2.091	-2.442	UDP-Glycosyltransferase superfamily protein	-2.451
Zm00001d049925	-1.465	-2.644	UDP-Glycosyltransferase superfamily protein	-2.143
Zm00001d019259	-3.328	-2.978	UDP-Glycosyltransferase superfamily protein	-3.117
Zm00001d008963	-3.539	-3.022	Uncharacterized protein family (UPF0016)	-2.986
Zm00001d020395	-1.525	-1.665	vacuolar iron transporter 1	-1.066
Zm00001d049584	-1.603	-2.1	wall-associated kinase 2	-2.054
Zm00001d038023	-1.003	-1.528	WRKY DNA-binding protein 33	-1.094
Zm00001d010399	-1.348	-1.98	WRKY DNA-binding protein 33	-1.111
Zm00001d015515	-1.683	-2.653	WRKY DNA-binding protein 40	-2.784
Zm00001d053746	-2.755	-3.93	WRKY DNA-binding protein 40	-4.433
Zm00001d010617	-1.41	-2.164	WRKY DNA-binding protein 62	-1.628
Zm00001d014617	-1.798	-2.223	xyloglucan endotransglucosylase/hydrolase 25	-1.128
Zm00001d020392	-1.342	-1.358	xyloglucan endotransglucosylase/hydrolase 28	-1.337
Zm00001d047970	-1.931	-1.821	xyloglucan endotransglucosylase/hydrolase 28	-1.824
Zm00001d017699	-1.379	-1.576	xyloglucan endotransglucosylase/hydrolase 30	-1.346
Zm00001d014613	-1.341	-1.369	Xyloglucan endotransglucosylase/hydrolase family protein	-1.601
Zm00001d009309	-1.783	-1.749	Xyloglucan endotransglucosylase/hydrolase family protein	-1.723
Zm00001d005698	-1.232	-1.976	zinc finger (AN1-like) family protein	-2.519
Zm00001d035455	-1.003	-1.544	zinc finger (CCCH-type) family protein	-1.082
Zm00001d052385	-1.432	-1.156	Zinc finger (CCCH-type) family protein / RNA recognition motif (RRM)-containing protein	-1.403
Zm00001d047330	-2.979	-4.294	zinc finger of Arabidopsis thaliana 6	-5.686
Zm00001d007285	-2.558	-3.807	Zinc-binding dehydrogenase family protein	-2.435
Zm00001d049032	-2.006	-4.705	Zinc-binding dehydrogenase family protein	-4.68
Zm00001d049031	-1.469	-2.646	Zinc-binding dehydrogenase family protein	-5.234
Zm00001d040670	-1.004	-1.254	2-oxoacid dehydrogenases acyltransferase family protein	NS
Zm00001d047931	-1.585	-2.07	3-ketoacyl-CoA synthase 1	NS
Zm00001d031222	-1.104	-1.282	AAA-ATPase 1	NS
Zm00001d003931	-1.81	-2.544	ACT domain repeat 6	NS
Zm00001d006267	-1.007	-1.453	ACT-like protein tyrosine kinase family protein	NS
Zm00001d049059	-1.486	-1.583	alcohol dehydrogenase 1	NS
Zm00001d048565	-1.132	-1.113	alpha/beta-Hydrolases superfamily protein	NS
Zm00001d028988	-1.579	-1.948	aminophospholipid ATPase 1	NS
Zm00001d028987	-1.156	-1.557	aminophospholipid ATPase 1	NS
Zm00001d037386	-1.21	-1.5	Ankyrin repeat family protein	NS
Zm00001d014166	-1.45	-1.442	ATPase E1-E2 type family protein / haloacid dehalogenase-like hydrolase family protein	NS
Zm00001d035999	-1.029	-1.03	BCL-2-associated athanogene 3	NS
Zm00001d011454	-1.611	-1.953	beta carbonic anhydrase 4	NS
Zm00001d028199	-1.261	-1.46	beta glucosidase 40	NS
Zm00001d001943	-2.786	-2.879	beta-fructofuranosidase 5	NS
Zm00001d010212	-1.836	-1.274	beta-galactosidase 16	NS
Zm00001d006915	-1.207	-1.272	Bifunctional inhibitor/lipid-transfer protein/seed storage 2S albumin superfamily protein	NS
Zm00001d019750	-1.128	-1.766	Calcium-dependent lipid-binding (CaLB domain) family protein	NS
Zm00001d046749	-1.081	-1.019	Calcium-dependent lipid-binding (CaLB domain) plant phosphoribosyltransferase family protein	NS
Zm00001d043144	-1.095	-1.299	calmodulin 5	NS
Zm00001d047535	-1.383	-1.978	calmodulin like 42	NS
Zm00001d019089	-1.564	-1.66	catalytics	NS
Zm00001d041972	-1.184	-1.755	cellulose synthase A9	NS
Zm00001d032810	-1.581	-1.683	CHY-type/CTCHY-type/RING-type Zinc finger protein	NS
Zm00001d020401	-1.501	-2.221	cinnamyl alcohol dehydrogenase homolog 2	NS
Zm00001d002536	-1.735	-1.572	Concanavalin A-like lectin protein kinase family protein	NS
Zm00001d035035	-1.546	-1.752	CRINKLY4 related 4	NS
Zm00001d002788	-1.232	-1.565	cyclin p4;3	NS
Zm00001d031971	-2.087	-2.008	Cysteine proteinases superfamily protein	NS
Zm00001d012304	-1.043	-1.158	cytochrome P450, family 94, subfamily C, polypeptide 1	NS
Zm00001d008730	-1.089	-1.209	Embryo-specific protein 3, (ATS3)	NS
Zm00001d032881	-1.458	-1.98	expansin 11	NS
Zm00001d029783	-1.385	-1.659	expansin-like A1	NS
Zm00001d020651	-1.141	-1.595	Family of unknown function (DUF716)	NS
Zm00001d021779	-1.293	-1.158	F-box family protein	NS
Zm00001d025205	-1.018	-1.189	FER-like regulator of iron uptake	NS
Zm00001d036237	-1.158	-1.573	GDSL-like Lipase/Acylhydrolase superfamily protein	NS
Zm00001d007076	-1.414	-1.962	Glycosyltransferase family 61 protein	NS
Zm00001d034763	-1.079	-1.321	Late embryogenesis abundant (LEA) hydroxyproline-rich glycoprotein family	NS
Zm00001d041236	-1.116	-1.183	Leucine-rich receptor-like protein kinase family protein	NS
Zm00001d044373	-1.091	-1.067	Leucine-rich repeat (LRR) family protein	NS
Zm00001d005252	-1.445	-1.414	Leucine-rich repeat protein kinase family protein	NS
Zm00001d035157	-1.043	-1.187	lysine histidine transporter 1	NS
Zm00001d052079	-1.057	-1.789	lysine-ketoglutarate reductase/saccharopine dehydrogenase bifunctional enzyme	NS
Zm00001d021752	-1.162	-1.557	Major facilitator superfamily protein	NS
Zm00001d034175	-1.226	-1.68	maternal effect embryo arrest 14	NS
Zm00001d047758	-1.159	-1.644	mitogen-activated protein kinase 3	NS
Zm00001d030915	-2.277	-2.944	N/A	NS
Zm00001d011789	-1.25	-2.562	N/A	NS
MSTRG.27035	-1.863	-2.354	N/A	NS
Zm00001d021006	-1.609	-1.869	N/A	NS
Zm00001d044660	-1.975	-1.867	N/A	NS
Zm00001d035310	-1.109	-1.682	N/A	NS
Zm00001d023280	-2.292	-1.647	N/A	NS
Zm00001d009365	-1.097	-1.623	N/A	NS
Zm00001d033909	-1.243	-1.556	N/A	NS
Zm00001d012532	-1.197	-1.464	N/A	NS
Zm00001d042581	-1.117	-1.323	N/A	NS
Zm00001d006059	-1.112	-1.296	N/A	NS
Zm00001d037903	-1.06	-1.289	N/A	NS
Zm00001d012480	-1.008	-1.045	N/A	NS
Zm00001d016950	-1.037	-1.31	NAC domain containing protein 100	NS
Zm00001d023294	-4.158	-3.836	NAC domain containing protein 47	NS
Zm00001d008397	-1.234	-2.33	nodulin-related protein 1	NS
Zm00001d022569	-1.088	-1.293	Nuclear transport factor 2 (NTF2) family protein	NS
Zm00001d006574	-1.094	-1.398	Octicosapeptide/Phox/Bem1p family protein	NS
Zm00001d051939	-1.046	-1.057	Octicosapeptide/Phox/Bem1p family protein	NS
Zm00001d012321	-2.389	-3.494	ortholog of sugar beet HS1 PRO-1 2	NS
Zm00001d006937	-1.766	-1.3	Peroxidase superfamily protein	NS
Zm00001d006933	-1.295	-1.292	Peroxidase superfamily protein	NS
Zm00001d006936	-1.42	-1.101	Peroxidase superfamily protein	NS
Zm00001d040399	-1.185	-1.096	Peroxidase superfamily protein	NS
Zm00001d050899	-1.604	-1.826	PLANT CADMIUM RESISTANCE 2	NS
Zm00001d045680	-1.613	-2.01	plantacyanin	NS
Zm00001d051174	-1.329	-1.344	plasma membrane intrinsic protein 2	NS
Zm00001d014625	-1.486	-1.832	P-loop containing nucleoside triphosphate hydrolases superfamily protein	NS
Zm00001d014960	-1.115	-1.213	protein binding	NS
Zm00001d043512	-1.311	-1.177	Protein kinase family protein with leucine-rich repeat domain	NS
Zm00001d023588	-1.294	-1.29	Protein kinase protein with adenine nucleotide alpha hydrolases-like domain	NS
Zm00001d003962	-1.113	-1.011	Protein of unknown function (DUF 3339)	NS
Zm00001d034221	-1.265	-1.025	Protein of unknown function (DUF1005)	NS
Zm00001d029119	-2.357	-4.054	Protein of unknown function (DUF567)	NS
Zm00001d005193	-1.054	-1.338	Protein of unknown function (DUF567)	NS
Zm00001d031329	-1.199	-1.155	Protein phosphatase 2C family protein	NS
Zm00001d029419	-1.242	-1.135	Protein phosphatase 2C family protein	NS
Zm00001d043256	-1.453	-1.64	receptor kinase 3	NS
Zm00001d012609	-1.296	-1.249	receptor kinase 3	NS
Zm00001d034217	-1.149	-1.566	receptor lectin kinase	NS
Zm00001d027685	-1.073	-1.541	RING/U-box superfamily protein	NS
Zm00001d002535	-1.071	-1.188	RING/U-box superfamily protein	NS
Zm00001d024406	-1.036	-1.116	RING/U-box superfamily protein	NS
Zm00001d032363	-1.589	-1.681	RmlC-like cupins superfamily protein	NS
Zm00001d034145	-1.03	-1.818	salt tolerance zinc finger	NS
Zm00001d025195	-1.05	-2.446	serine carboxypeptidase-like 20	NS
Zm00001d035683	-3.91	-1.854	Serine protease inhibitor, potato inhibitor I-type family protein	NS
Zm00001d020703	-1.234	-2.022	S-locus lectin protein kinase family protein	NS
Zm00001d016783	-1.122	-1.09	SNF1-related protein kinase 2.10	NS
Zm00001d027548	-1.066	-1.021	sterol methyltransferase 2	NS
Zm00001d045042	-1.267	-1.24	sucrose synthase 4	NS
Zm00001d024512	-1.322	-2.464	Terpenoid cyclases/Protein prenyltransferases superfamily protein	NS
Zm00001d052060	-1.176	-1.487	trehalose phosphate synthase	NS
Zm00001d039366	-1.156	-1.613	TRICHOME BIREFRINGENCE-LIKE 38	NS
Zm00001d017107	-1.08	-1.315	Ubiquitin-like superfamily protein	NS
Zm00001d019254	-1.006	-1.092	UDP-Glycosyltransferase superfamily protein	NS
Zm00001d018431	-1.204	-1.275	wall associated kinase 3	NS
Zm00001d039532	-1.47	-2.097	WRKY DNA-binding protein 72	NS
