# Supplementary material for: Comparative Transcriptomics Reveal Metabolic Rather than Genetic Control of Divergent Antioxidant Metabolism in the Primary Root Elongation Zone of Water-Stressed Cotton and Maize
Source: Antioxidants (Basel). 2023 Jan 27;12(2):287. doi: 10.3390/antiox12020287 (PMC9952253; doi:10.3390/antiox12020287)
Supplement: Supplementary file 1 [file antioxidants-12-00287-s001.zip › Table S3.xlsx]

## Sheet: Table S3
Supplemental Table S3. Numbers of increased and decreased DATs assigned to KEGG pathways in cotton and maize primary root elongation zone in response to water-deficit stress.
Super Pathway	Pathway	Cotton		Maize
		Increased DATs	Decreased DATs	Increased DATs	Decreased DATs
Carbohydrate metabolism	Starch and sucrose metabolism	37	18	22	24
	Glycolysis	2	7	11	6
	TCA Cycle	1	0	2	1
	Pentose phosphate pathway	0	2	9	0
	Fructose and mannose metabolism	0	2	4	1
	Pentose and glucuronate interconversions	16	8	7	3
	Amino sugar and nucleotide sugar metabolism	9	15	10	3
	Ascorbate and aldarate metabolism	0	4	7	5
Amino acid metabolism	Alanine, aspartate and glutamate metabolism	0	7	9	4
	Arginine biosynthesis	0	2	3	2
	Arginine and proline metabolism	5	3	8	2
	Glycine, serine and threonine metabolism	0	7	2	5
	Cysteine and methionine metabolism	3	7	4	9
	Glutathione metabolism	1	0	2	7
	Phenylalanine, tyrosine and tryptophan biosynthesis	0	1	4	1
	Phenylalanine metabolism	0	3	2	1
	Tyrosine metabolism	1	5	4	2
	Tryptophan metabolism	11	9	2	0
	Valine, leucine and isoleucine degradation	0	7	4	5
	Valine, leucine and isoleucine biosynthesis	1	0	0	0
	Lysine degradation	0	3	4	2
	Histidine metabolism	0	0	6	0
Metabolism of cofactors and vitamins	Thiamine metabolism	0	2	2	1
	Riboflavin metabolism	4	0	0	0
	Nicotinate and nicotinamide metabolism	0	1	3	4
	Flavonoid biosynthesis	0	0	3	1
	Vitamin B6 metabolism	0	1	0	0
	Pantothenate and CoA biosynthesis	0	1	6	0
	Ubiquinone and other terpenoid-quinone biosynthesis	1	2	4	0
Nucleotide metabolism	Purine metabolism	0	2	3	2
	Pyrimidine metabolism	0	3	2	1
Lipid metabolism	Glycerophospholipid metabolism	0	2	9	6
	Glycerolipid metabolism	4	12	18	9
	Steroid biosynthesis	0	0	18	15
	Fatty acid biosynthesis	1	0	1	0
	Fatty acid elongation	0	0	6	1
	Fatty acid degradation	1	4	7	1
	Biosynthesis of unsaturated fatty acids	0	2	2	0
	alpha-Linolenic acid metabolism	3	2	3	4
Nutrient metabolism	Sulfur metabolism	1	3	3	4
	Nitrogen metabolism	1	3	5	6
Biosynthesis of other secondary metabolites	Phenylpropanoid biosynthesis	9	19	6	27
Metabolism of terpenoids and polyketides	Carotenoid biosynthesis	10	13	5	2
Glycan biosynthesis and metabolism	Various types of N-glycan biosynthesis	1	0	0	0
