# Supplementary material for: Comparative Transcriptomics Reveal Metabolic Rather than Genetic Control of Divergent Antioxidant Metabolism in the Primary Root Elongation Zone of Water-Stressed Cotton and Maize
Source: Antioxidants (Basel). 2023 Jan 27;12(2):287. doi: 10.3390/antiox12020287 (PMC9952253; doi:10.3390/antiox12020287)
Supplement: Supplementary file 1 [file antioxidants-12-00287-s001.zip › Table S4.xlsx]

## Sheet: Table S4
Supplemental Table S4. Primary comparison (left columns): Ratios of transcript abundance of DATs related to ROS metabolism that significantly changed in the elongation zone of maize primary roots in response to water stress at 48 after water stress imposition. DATs had to be significantly increased or decreased in comparisons of WS48/WW24 (developmental control) and WS48/WW48 (temporal control) t…
Maize ID	WS48/WW24log2FC	WS48/WW48log2FC	Function	WS24/WW24log2FC
Zm00001d039566	5.699	4.746	17.6 kDa class II heat shock protein	6.192
Zm00001d021360	1.441	1.553	2 iron, 2 sulfur cluster binding	1.833
Zm00001d049926	3.466	2.697	2-oxoglutarate (2OG) and Fe(II)-dependent oxygenase superfamily protein	3.852
Zm00001d018847	2.736	1.366	3-oxo-5-alpha-steroid 4-dehydrogenase family protein	2.902
Zm00001d006476	6.171	7.634	aconitase 3	7.275
Zm00001d045606	1.204	1.436	acyl-CoA oxidase 1	1.373
Zm00001d050428	1.948	1.292	aldehyde dehydrogenase 11A3	2.084
Zm00001d017418	1.886	1.606	aldehyde dehydrogenase 3F1	1.683
Zm00001d015406	1.843	1.791	aldehyde dehydrogenase 5F1	2.265
Zm00001d015404	1.885	1.553	aldehyde dehydrogenase 5F1	2.477
Zm00001d015405	1.703	1.525	aldehyde dehydrogenase 5F1	2.218
Zm00001d048469	1.811	2.516	beta-hydroxylase 1	2.109
Zm00001d027443	1.661	1.876	beta-hydroxylase 1	2.288
Zm00001d029190	2.062	1.701	beta-ketoacyl reductase 1	2.56
Zm00001d028252	3.756	3.388	Caleosin-related family protein	3.568
Zm00001d054044	2.74	2.86	catalase 1	3.218
Zm00001d027511	2.847	2.408	catalase 2	4.75
Zm00001d019669	4.167	2.97	cinnamoyl coa reductase 1	5.285
Zm00001d002773	6.459	6.14	Cupredoxin superfamily protein	7.33
Zm00001d032042	4.927	5.224	cytochrome p450 78a9	6.497
Zm00001d003349	1.295	1.17	Cytochrome P450 superfamily protein	1.439
Zm00001d002610	1.827	2.214	cytochrome P450, family 704, subfamily A, polypeptide 2	2.164
Zm00001d048703	1.455	1.877	cytochrome P450, family 71, subfamily A, polypeptide 24	2.791
Zm00001d048702	3.669	4.838	cytochrome P450, family 71, subfamily B, polypeptide 10	4.685
Zm00001d014121	5.633	10.578	cytochrome p450, family 71, subfamily B, polypeptide 11	6.514
Zm00001d014134	2.046	2.872	cytochrome P450, family 71, subfamily B, polypeptide 14	2.715
Zm00001d033152	1.609	1.324	cytochrome P450, family 71, subfamily B, polypeptide 34	2.776
Zm00001d048710	3.898	8.237	cytochrome P450, family 71, subfamily B, polypeptide 37	6.074
Zm00001d030851	1.67	1.683	cytochrome P450, family 81, subfamily D, polypeptide 3	1.876
Zm00001d034097	7.678	10.376	cytochrome P450, family 81, subfamily D, polypeptide 8	8.263
Zm00001d034096	4.241	5.817	cytochrome P450, family 81, subfamily D, polypeptide 8	5.624
Zm00001d034095	4.358	4.115	cytochrome P450, family 81, subfamily D, polypeptide 8	5.871
Zm00001d017528	4.315	4.737	cytochrome P450, family 86, subfamily A, polypeptide 2	5.753
Zm00001d002687	7.269	9.959	cytochrome P450, family 86, subfamily A, polypeptide 4	8.856
Zm00001d013979	7.013	7.697	cytochrome P450, family 86, subfamily B, polypeptide 1	8.074
Zm00001d032651	3.866	3.14	cytochrome P450, family 86, subfamily B, polypeptide 1	4.573
Zm00001d039453	1.357	1.023	cytochrome P450, family 90, subfamily D, polypeptide 1	1.649
Zm00001d012391	3.254	3.459	delta 1-pyrroline-5-carboxylate synthase 2	3.423
Zm00001d047726	1.132	1.136	DNAJ heat shock N-terminal domain-containing protein	1.37
Zm00001d040504	1.442	1.318	early nodulin-like protein 18	1.037
Zm00001d014463	1.795	1.987	early nodulin-like protein 9	2.077
Zm00001d049539	1.569	1.406	FAD-binding Berberine family protein	2.035
Zm00001d014055	4.779	4.507	Fatty acid hydroxylase superfamily	4.015
Zm00001d017251	2.945	3.541	Fatty acid hydroxylase superfamily	2.944
Zm00001d019850	3.684	3.084	fatty acid reductase 1	5.637
Zm00001d000107	3.902	2.926	fatty acid reductase 1	3.818
Zm00001d025352	2.719	2.776	ferredoxin 3	3.578
Zm00001d001960	5.031	1.931	flavanone 3-hydroxylase	5.54
Zm00001d010698	1.872	1.727	flavodoxin-like quinone reductase 1	1.557
Zm00001d046342	1.349	1.848	GA requiring 3	1.771
Zm00001d039131	2.863	3.265	Glucose-1-phosphate adenylyltransferase family protein	3.51
Zm00001d037079	1.082	1.006	glutathione peroxidase 1	1.096
Zm00001d045610	1.233	1.005	homogentisate 1,2-dioxygenase	1.732
Zm00001d044728	4.003	4.902	HSP20-like chaperones superfamily protein	3.695
Zm00001d039941	5.145	3.986	HSP20-like chaperones superfamily protein	5.742
Zm00001d018298	4.182	3.762	HSP20-like chaperones superfamily protein	4.146
Zm00001d007345	5.795	5.27	hydroxysteroid dehydrogenase 1	7.105
Zm00001d038897	2.136	1.621	indole-3-butyric acid response 1	1.955
Zm00001d012477	5.808	6.328	laccase 12	7.392
Zm00001d043019	4.248	4.373	laccase 12	5.462
Zm00001d042905	2.37	1.655	laccase 17	2.463
Zm00001d048759	2.036	2.076	laccase 7	2.69
Zm00001d042848	2.34	1.665	laccase 7	2.965
Zm00001d033623	2.833	2.383	lipoxygenase 1	3.745
Zm00001d044748	6.892	6.93	N/A	7.225
Zm00001d043226	1.229	1.388	N/A	1.664
Zm00001d014481	2.347	2.312	NAD(P)-binding Rossmann-fold superfamily protein	2.549
Zm00001d040954	1.962	1.666	NAD(P)-binding Rossmann-fold superfamily protein	1.92
Zm00001d040953	1.934	1.637	NAD(P)-binding Rossmann-fold superfamily protein	2.032
Zm00001d031802	1.45	1.604	NAD(P)-binding Rossmann-fold superfamily protein	1.483
Zm00001d011446	2.034	1.484	NAD(P)-binding Rossmann-fold superfamily protein	1.797
Zm00001d036557	1.657	1.531	NAD(P)H dehydrogenase B1	1.923
Zm00001d038365	2.638	2.73	NAD(P)-linked oxidoreductase superfamily protein	2.311
Zm00001d012764	6.914	7.735	NADP-malic enzyme 3	9.16
Zm00001d033222	3.811	2.88	nine-cis-epoxycarotenoid dioxygenase 9	3.832
Zm00001d018206	7.838	5.865	nitrate reductase 1	6.198
Zm00001d018161	2.102	2.101	nitrite reductase 1	2.214
Zm00001d049071	11.102	9.239	Peroxidase superfamily protein	11.461
Zm00001d037359	6.545	7.824	Peroxidase superfamily protein	8.035
Zm00001d014341	2.421	2.819	Peroxidase superfamily protein	2.701
Zm00001d029604	1.553	2.077	Peroxidase superfamily protein	1.479
Zm00001d009140	2.265	1.226	Peroxidase superfamily protein	2.566
Zm00001d034900	1.342	1.176	PGR5-LIKE A	1.252
Zm00001d042026	3.389	2.97	Pheophorbide a oxygenase family protein with Rieske [2Fe-2S] domain	3.147
Zm00001d044211	1.784	1.848	phosphoglucomutase	1.839
Zm00001d015356	1.312	1.322	phytoene desaturation 1	1.18
Zm00001d046493	1.218	1.396	Plant haem oxygenase (decyclizing) family protein	1.259
Zm00001d002000	3.766	1.927	PLAT/LH2 domain-containing lipoxygenase family protein	3.845
Zm00001d026334	1.669	1.004	polyamine oxidase 2	1.229
Zm00001d036513	1.88	1.217	polyamine oxidase 3	1.246
Zm00001d033098	3.344	2.205	post-illumination chlorophyll fluorescence increase	4.1
Zm00001d039685	4.644	4.8	Raffinose synthase family protein	5.515
Zm00001d032925	1.041	1.141	RmlC-like cupins superfamily protein	1.052
Zm00001d040245	2.456	5.594	serine-type endopeptidase inhibitors	3.473
Zm00001d016684	2.579	4.307	starch branching enzyme 2.2	3.06
Zm00001d003817	1.415	1.822	starch branching enzyme 2.2	1.625
Zm00001d016802	1.675	2.023	thylakoidal ascorbate peroxidase	1.729
Zm00001d015985	1.071	1.174	tocopherol cyclase, chloroplast / vitamin E deficient 1 (VTE1) / sucrose export defective 1 (SXD1)	1.146
Zm00001d003512	1.648	1.664	zeaxanthin epoxidase (ZEP) (ABA1)	1.816
Zm00001d050775	1.183	1.18	NAD(P)-binding Rossmann-fold superfamily protein	NS
Zm00001d011097	-1.565	-2.66	12-oxophytodienoate reductase 1	-2.796
Zm00001d009503	-1.33	-1.686	2-oxoglutarate (2OG) and Fe(II)-dependent oxygenase superfamily protein	-1.523
Zm00001d024853	-1.898	-2.346	2-oxoglutarate (2OG) and Fe(II)-dependent oxygenase superfamily protein	-4.761
Zm00001d002436	-1.791	-1.944	alternative oxidase 1A	-1.773
Zm00001d007728	-7.106	-9.554	ATP-dependent caseinolytic (Clp) protease/crotonase family protein	-4.448
Zm00001d048191	-1.117	-1.442	Auxin-responsive family protein	-1.112
Zm00001d007732	-2.724	-2.939	beta-hydroxyisobutyryl-CoA hydrolase 1	-3.581
Zm00001d007726	-5.95	-8.722	beta-hydroxyisobutyryl-CoA hydrolase 1	-4.156
Zm00001d030670	-2.317	-2.594	Caleosin-related family protein	-1.348
Zm00001d002736	-1.946	-3.317	carotenoid cleavage dioxygenase 7	-4.308
Zm00001d006638	-1.26	-1.633	Copper amine oxidase family protein	-1.871
Zm00001d032504	-2.3	-1.357	Cupredoxin superfamily protein	-2.295
Zm00001d006098	-2.422	-1.899	Cyclopropane-fatty-acyl-phospholipid synthase	-1.282
Zm00001d039650	-1.135	-1.28	Cytochrome P450 superfamily protein	-1.306
Zm00001d022351	-2.133	-2.796	Cytochrome P450 superfamily protein	-2.408
Zm00001d005823	-2.572	-3.598	Cytochrome P450 superfamily protein	-3.243
Zm00001d046603	-1.385	-1.466	cytochrome P450, family 71, subfamily A, polypeptide 25	-1.138
Zm00001d015589	-2.164	-2.466	cytochrome P450, family 71, subfamily B, polypeptide 37	-2.198
Zm00001d039384	-1.689	-1.629	cytochrome P450, family 710, subfamily A, polypeptide 1	-1.67
Zm00001d039697	-1.528	-2.243	cytochrome P450, family 711, subfamily A, polypeptide 1	-1.088
Zm00001d044146	-1.659	-2.848	cytochrome P450, family 72, subfamily A, polypeptide 14	-4.494
Zm00001d028419	-1.106	-1.109	cytochrome P450, family 76, subfamily C, polypeptide 1	-1.526
Zm00001d006649	-1.709	-1.173	cytochrome P450, family 87, subfamily A, polypeptide 6	-1.22
Zm00001d013230	-1.409	-2.039	cytochrome P450, family 91, subfamily A, polypeptide 2	-1.775
Zm00001d044703	-1.321	-2.13	cytochrome P450, family 94, subfamily C, polypeptide 1	-1.565
Zm00001d052530	-2.13	-3.124	cytochrome P450, family 94, subfamily C, polypeptide 1	-4.511
Zm00001d049683	-4.5	-5.015	D-arabinono-1,4-lactone oxidase family protein	-3.069
Zm00001d004451	-1.369	-2.256	D-isomer specific 2-hydroxyacid dehydrogenase family protein	-1.97
Zm00001d020400	-1.943	-2.877	elicitor-activated gene 3-1	-2.071
Zm00001d028694	-3.362	-3.704	ent-kaurenoic acid hydroxylase 2	-2.353
Zm00001d047830	-3.314	-6.264	ent-kaurenoic acid hydroxylase 2	-5.76
Zm00001d049169	-5.179	-5.331	FAD-binding Berberine family protein	-4.493
Zm00001d020984	-1.345	-1.168	FAD-dependent oxidoreductase family protein	-1.673
Zm00001d020238	-3.125	-2.819	Glucose-methanol-choline (GMC) oxidoreductase family protein	-2.475
Zm00001d034420	-1.638	-1.679	glutamate dehydrogenase 1	-2.002
Zm00001d025984	-1.422	-1.223	glutamate dehydrogenase 2	-1.27
Zm00001d009646	-7.695	-8.239	GRAS family transcription factor family protein	-5.442
Zm00001d021634	-3.181	-2.855	HSP20-like chaperones superfamily protein	-3.525
Zm00001d053675	-1.808	-2.05	lipoxygenase 2	-1.828
Zm00001d047124	-4.404	-4.215	Methylenetetrahydrofolate reductase family protein	-6.545
Zm00001d029853	-5.412	-5.527	Methylenetetrahydrofolate reductase family protein	-6.658
Zm00001d016842	-1.633	-2.814	monooxygenase 1	-1.201
Zm00001d046234	-6.26	-6.152	myo-inositol oxygenase 1	-5.701
Zm00001d025402	-1.121	-1.385	N/A	-1.992
Zm00001d034731	-1.02	-1.119	NAD(P)-binding Rossmann-fold superfamily protein	-1.294
Zm00001d003841	-1.143	-2.662	NAD(P)-binding Rossmann-fold superfamily protein	-1.648
Zm00001d020958	-2.981	-3.686	NAD(P)-binding Rossmann-fold superfamily protein	-4.101
Zm00001d049597	-1.142	-1.174	NAD(P)H dehydrogenase B2	-1.362
Zm00001d031666	-3.267	-4.375	NAD(P)-linked oxidoreductase superfamily protein	-5.023
Zm00001d047441	-1.545	-2.847	NADPH:quinone oxidoreductase	-3.543
Zm00001d004021	-1.018	-1.38	non-photochemical quenching 1	-1.16
Zm00001d014603	-1.837	-2.198	Peroxidase family protein	-1.95
Zm00001d040702	-1.009	-1.381	Peroxidase superfamily protein	-1.049
Zm00001d024735	-1.653	-1.812	Peroxidase superfamily protein	-1.371
Zm00001d009138	-1.802	-1.859	Peroxidase superfamily protein	-1.739
Zm00001d024738	-1.64	-2.418	Peroxidase superfamily protein	-1.072
Zm00001d040581	-2.471	-2.471	Peroxidase superfamily protein	-2.402
Zm00001d041827	-3.623	-3.137	Peroxidase superfamily protein	-3.468
Zm00001d002898	-3.216	-3.144	Peroxidase superfamily protein	-1.507
Zm00001d045846	-2.85	-3.524	Peroxidase superfamily protein	-1.846
Zm00001d035055	-7.442	-8.952	Peroxidase superfamily protein	-7.442
Zm00001d016185	-1.081	-1.029	Peroxidase superfamily protein	-1.418
Zm00001d022456	-1.359	-1.677	Peroxidase superfamily protein	-1.624
Zm00001d022458	-1.725	-1.749	Peroxidase superfamily protein	-1.952
Zm00001d053839	-2.015	-2.143	Peroxidase superfamily protein	-1.902
Zm00001d052335	-1.937	-2.331	Peroxidase superfamily protein	-2.272
Zm00001d007160	-2.332	-3.37	Peroxidase superfamily protein	-2.414
Zm00001d046186	-4.41	-4.437	Peroxidase superfamily protein	-2.534
Zm00001d022457	-3.265	-5.95	Peroxidase superfamily protein	-5.043
Zm00001d032854	-6.974	-9.42	Peroxidase superfamily protein	-6.974
Zm00001d036535	-6.032	-5.718	photosystem II subunit O-2	-6.493
Zm00001d041204	-2.515	-2.614	PLAT/LH2 domain-containing lipoxygenase family protein	-4.168
Zm00001d037480	-1.838	-1.642	Raffinose synthase family protein	-1.732
Zm00001d052034	-2.708	-3.512	thioredoxin 2	-1.609
Zm00001d031257	-1.826	-2.309	uclacyanin 1	-1.747
Zm00001d007285	-2.558	-3.807	Zinc-binding dehydrogenase family protein	-2.435
Zm00001d049032	-2.006	-4.705	Zinc-binding dehydrogenase family protein	-4.68
Zm00001d049059	-1.486	-1.583	alcohol dehydrogenase 1	NS
Zm00001d043144	-1.095	-1.299	calmodulin 5	NS
Zm00001d020401	-1.501	-2.221	cinnamyl alcohol dehydrogenase homolog 2	NS
Zm00001d012304	-1.043	-1.158	cytochrome P450, family 94, subfamily C, polypeptide 1	NS
Zm00001d052079	-1.057	-1.789	lysine-ketoglutarate reductase/saccharopine dehydrogenase bifunctional enzyme	NS
Zm00001d006937	-1.766	-1.3	Peroxidase superfamily protein	NS
Zm00001d006933	-1.295	-1.292	Peroxidase superfamily protein	NS
Zm00001d006936	-1.42	-1.101	Peroxidase superfamily protein	NS
Zm00001d040399	-1.185	-1.096	Peroxidase superfamily protein	NS
Zm00001d045680	-1.613	-2.01	plantacyanin	NS
