# Supplementary material for: Comparative Transcriptomics Reveal Metabolic Rather than Genetic Control of Divergent Antioxidant Metabolism in the Primary Root Elongation Zone of Water-Stressed Cotton and Maize
Source: Antioxidants (Basel). 2023 Jan 27;12(2):287. doi: 10.3390/antiox12020287 (PMC9952253; doi:10.3390/antiox12020287)
Supplement: Supplementary file 1 [file antioxidants-12-00287-s001.zip › Table S5.xlsx]

## Sheet: Table S5
Supplemental Table S5. DATs in KEGG pathways that had distinguished differences between cotton and maize primary roots in response to water-deficit stress with their KEGG Orthology IDs. Yellow bars indicate the increased DATs. Blue bars indicate the decreased DATs.
Pathway	Cotton ID	WS48/WW24log2FC	WS48/WW48log2FC	KEGG Orthology ID	Function	Maize ID	WS48/WW24log2FC	WS48/WW48log2FC	KEGG Orthology ID	Function
Sulfur metabolism	Gh_D10G0693	1.46	1.151	K24175	sulfate transmembrane transporters	Zm00001d048785	2.333	1.843	K00860	adenosine-5\'-phosphosulfate (APS) kinase 3
	Gh_D12G0026	-2.938	-3.462	K17471	sulfate transporter 3;1	Zm00001d004513	-1.248	-1.252	K13811	Pseudouridine synthase/archaeosine transglycosylase-like family protein
	Gh_A12G0022	-1.827	-2.212	K17471	sulfate transporter 3;1	Zm00001d028154	-1.008	-1.369	K00640	serine acetyltransferase 2;1
	Gh_A05G0386	-1.444	-1.804	K01101	Sulfite exporter TauE/SafE family protein	Zm00001d027749	2.177	1.614	K17471	sulfate transporter 3;1
						Zm00001d000204	1.233	1.184	K17471	sulfate transporter 3;4
						Zm00001d002038	-3.026	-2.164	K17471	sulfate transporter 91
						Zm00001d054093	-2.374	-3.045	K02439	sulfurtransferase 18
Glutahione metabolism	Gh_D13G1617	3.683	1.72	K00799	glutathione S-transferase TAU 19	Zm00001d037079	1.082	1.006	K00432	glutathione peroxidase 1
						Zm00001d022312	-1.224	-1.52	K00799	Glutathione S-transferase family protein
						Zm00001d024839	-1.105	-1.603	K00799	Glutathione S-transferase family protein
						Zm00001d027557	-1.078	-1.78	K00799	Glutathione S-transferase family protein
						Zm00001d048558	-1.36	-1.784	K00799	Glutathione S-transferase family protein
						Zm00001d029700	-1.828	-2.36	K00799	Glutathione S-transferase family protein
						Zm00001d029696	-2.208	-2.778	K00799	glutathione S-transferase TAU 18
						Zm00001d042104	-4.309	-5.446	K00799	glutathione S-transferase TAU 8
						Zm00001d016802	1.675	2.023	K00434	thylakoidal ascorbate peroxidase
Fatty acid elongation						Zm00001d028406	1.22	1.775	K15397	3-ketoacyl-CoA synthase 1
						Zm00001d047931	-1.585	-2.07	K15397	3-ketoacyl-CoA synthase 1
						Zm00001d014168	3.21	3.149	K15397	3-ketoacyl-CoA synthase 11
						Zm00001d048953	4.922	3.735	K15397	3-ketoacyl-CoA synthase 2
						Zm00001d028241	9.286	6.888	K15397	3-ketoacyl-CoA synthase 6
						Zm00001d037328	8.114	8.151	K15397	3-ketoacyl-CoA synthase 6
						Zm00001d029190	2.062	1.701	K10251	beta-ketoacyl reductase 1
Fatty acid degradation	Gh_D11G0606	2.472	2.831	K18857	alcohol dehydrogenase 1	Zm00001d050428	1.948	1.292	K00131	aldehyde dehydrogenase 11A3
	Gh_D07G1557	-2.027	-2.377	K07513	peroxisomal 3-ketoacyl-CoA thiolase 3	Zm00001d017418	1.886	1.606	K00128	aldehyde dehydrogenase 3F1
	Gh_A07G1461	-1.446	-1.868	K00632	peroxisomal 3-ketoacyl-CoA thiolase 3	Zm00001d015404	1.885	1.553	K17761	aldehyde dehydrogenase 5F1
	Gh_D01G0907	-1.638	-1.417	K00121	Zinc-binding alcohol dehydrogenase family protein	Zm00001d015406	1.843	1.791	K17761	aldehyde dehydrogenase 5F1
	Gh_A01G0872	-1.264	-1.168	K00121	Zinc-binding alcohol dehydrogenase family protein	Zm00001d015405	1.703	1.525	K17761	aldehyde dehydrogenase 5F1
						Zm00001d045606	1.204	1.436	K00232	acyl-CoA oxidase 1
						Zm00001d049059	-1.486	-1.583	K18857	alcohol dehydrogenase 1
						Zm00001d017418	1.886	1.606	K00128	aldehyde dehydrogenase 3F1
Steroid biosynthesis						Zm00001d040196	-2.472	-2.892	K01824	C-8,7 sterol isomerase
						Zm00001d032042	4.927	5.224	K20619	cytochrome p450 78a9
						Zm00001d003349	1.295	1.17	K12639	Cytochrome P450 superfamily protein
						Zm00001d039650	-1.135	-1.28	K15639	Cytochrome P450 superfamily protein
						Zm00001d022351	-2.133	-2.796	K15639	Cytochrome P450 superfamily protein
						Zm00001d005823	-2.572	-3.598	K20623	Cytochrome P450 superfamily protein
						Zm00001d002610	1.827	2.214	K14040	cytochrome P450, family 704, subfamily A, polypeptide 2
						Zm00001d048703	1.455	1.877	K13225	cytochrome P450, family 71, subfamily A, polypeptide 24
						Zm00001d046603	-1.385	-1.466	K15472	cytochrome P450, family 71, subfamily A, polypeptide 25
						Zm00001d048702	3.669	4.838	K13224	cytochrome P450, family 71, subfamily B, polypeptide 10
						Zm00001d014134	2.046	2.872	K23134	cytochrome P450, family 71, subfamily B, polypeptide 14
						Zm00001d033152	1.609	1.324	K13223	cytochrome P450, family 71, subfamily B, polypeptide 34
						Zm00001d048710	3.898	8.237	K13223	cytochrome P450, family 71, subfamily B, polypeptide 37
						Zm00001d015589	-2.164	-2.466	K15472	cytochrome P450, family 71, subfamily B, polypeptide 37
						Zm00001d039697	-1.528	-2.243	K01832	cytochrome P450, family 711, subfamily A, polypeptide 1
						Zm00001d044146	-1.659	-2.848	K07424	cytochrome P450, family 72, subfamily A, polypeptide 14
						Zm00001d028419	-1.106	-1.109	K15099	cytochrome P450, family 76, subfamily C, polypeptide 1
						Zm00001d030851	1.67	1.683	K13260	cytochrome P450, family 81, subfamily D, polypeptide 3
						Zm00001d034097	7.678	10.376	K13260	cytochrome P450, family 81, subfamily D, polypeptide 8
						Zm00001d034095	4.358	4.115	K13260	cytochrome P450, family 81, subfamily D, polypeptide 8
						Zm00001d034096	4.241	5.817	K13260	cytochrome P450, family 81, subfamily D, polypeptide 8
						Zm00001d017528	4.315	4.737	K15398	cytochrome P450, family 86, subfamily A, polypeptide 2
						Zm00001d002687	7.269	9.959	K15398	cytochrome P450, family 86, subfamily A, polypeptide 4
						Zm00001d013979	7.013	7.697	K15402	cytochrome P450, family 86, subfamily B, polypeptide 1
						Zm00001d032651	3.866	3.14	K15402	cytochrome P450, family 86, subfamily B, polypeptide 1
						Zm00001d006649	-1.709	-1.173	K15402	cytochrome P450, family 87, subfamily A, polypeptide 6
						Zm00001d039453	1.357	1.023	K09589	cytochrome P450, family 90, subfamily D, polypeptide 1
						Zm00001d013230	-1.409	-2.039	K09589	cytochrome P450, family 91, subfamily A, polypeptide 2
						Zm00001d044703	-1.321	-2.13	K20624	cytochrome P450, family 94, subfamily C, polypeptide 1
						Zm00001d052530	-2.13	-3.124	K20624	cytochrome P450, family 94, subfamily C, polypeptide 1
						Zm00001d012304	-1.043	-1.158	K20624	cytochrome P450, family 94, subfamily C, polypeptide 1
						Zm00001d013035	1.53	1.349	K00559	sterol methyltransferase 1
						Zm00001d027548	-1.066	-1.021	K08242	sterol methyltransferase 2
Riboflavin metabolism	Gh_A06G1838	3.773	3.429	K01078	purple acid phosphatase 10
	Gh_A05G1622	2.064	2.272	K01078	purple acid phosphatase 12
	Gh_D11G0018	3.234	2.021	K14379	purple acid phosphatase 17
	Gh_D04G0974	1.659	1.738	K22390	purple acid phosphatase 22
