# Supplementary material for: Comparative Transcriptomics Reveal Metabolic Rather than Genetic Control of Divergent Antioxidant Metabolism in the Primary Root Elongation Zone of Water-Stressed Cotton and Maize
Source: Antioxidants (Basel). 2023 Jan 27;12(2):287. doi: 10.3390/antiox12020287 (PMC9952253; doi:10.3390/antiox12020287)
Supplement: Supplementary file 1 [file antioxidants-12-00287-s001.zip › Table S6.xlsx]

## Sheet: Table S6
Supplemental Table S6. Ortholog matches that contain DATs in cotton and maize primary roots in response to water-deficit stress identified with both ortholog analysis methods with the ortholog group IDs. Blue cells indicate DATs in cotton. Yellow cells indicate DATs in maize.The three Function columns corespond to the IDs of cotton and maize transcripts in column 3, 4, 5.
#	Orthogroup	NBI_Gossypium_hirsutum_v1.1	Zea_mays.B73_RefGen_v4_orthofinder	Zea_mays.B73_RefGen_v4_OMA	Function Cotton	Function Maize 1	Function Maize 2
1	OG0000000	Gh_A01G0533	Zm00001d043257	Zm00001d002174	protein serine/threonine kinases;protein kinases;ATP binding;sugar binding;kinases;carbohydrate binding	S-locus lectin protein kinase family protein	S-locus lectin protein kinase family protein
2	OG0000000	Gh_A04G0204	Zm00001d043257	Zm00001d002174	protein serine/threonine kinases;protein kinases;ATP binding;sugar binding;kinases;carbohydrate binding	S-locus lectin protein kinase family protein	S-locus lectin protein kinase family protein
3	OG0000000	Gh_A10G0169	Zm00001d043253	Zm00001d043256	protein serine/threonine kinases;protein kinases;ATP binding;sugar binding;kinases;carbohydrate binding	receptor kinase 3	receptor kinase 3
4	OG0000000	Gh_A10G0169	Zm00001d043256	Zm00001d032408	protein serine/threonine kinases;protein kinases;ATP binding;sugar binding;kinases;carbohydrate binding	receptor kinase 3	receptor kinase 3
5	OG0000000	Gh_A10G0169	Zm00001d043256	Zm00001d043256	protein serine/threonine kinases;protein kinases;ATP binding;sugar binding;kinases;carbohydrate binding	receptor kinase 3	receptor kinase 3
6	OG0000000	Gh_A10G0169	Zm00001d032408	Zm00001d043256	protein serine/threonine kinases;protein kinases;ATP binding;sugar binding;kinases;carbohydrate binding	receptor kinase 3	receptor kinase 3
7	OG0000000	Gh_A10G0169	Zm00001d021726	Zm00001d043256	protein serine/threonine kinases;protein kinases;ATP binding;sugar binding;kinases;carbohydrate binding	receptor kinase 3	receptor kinase 3
8	OG0000000	Gh_A10G0169	Zm00001d010700	Zm00001d043256	protein serine/threonine kinases;protein kinases;ATP binding;sugar binding;kinases;carbohydrate binding	receptor kinase 3	receptor kinase 3
9	OG0000000	Gh_A10G0169	Zm00001d012609	Zm00001d032408	protein serine/threonine kinases;protein kinases;ATP binding;sugar binding;kinases;carbohydrate binding	receptor kinase 3	receptor kinase 3
10	OG0000000	Gh_A10G0169	Zm00001d012609	Zm00001d043256	protein serine/threonine kinases;protein kinases;ATP binding;sugar binding;kinases;carbohydrate binding	receptor kinase 3	receptor kinase 3
11	OG0000000	Gh_A10G0169	Zm00001d043252	Zm00001d043256	protein serine/threonine kinases;protein kinases;ATP binding;sugar binding;kinases;carbohydrate binding	receptor kinase 3	receptor kinase 3
12	OG0000000	Gh_A10G0170	Zm00001d021727	Zm00001d002174	protein serine/threonine kinases;protein kinases;ATP binding;sugar binding;kinases;carbohydrate binding	S-locus lectin protein kinase family protein	S-locus lectin protein kinase family protein
13	OG0000000	Gh_A10G0170	Zm00001d021729	Zm00001d002174	protein serine/threonine kinases;protein kinases;ATP binding;sugar binding;kinases;carbohydrate binding	S-locus lectin protein kinase family protein	S-locus lectin protein kinase family protein
14	OG0000000	Gh_D01G0255	Zm00001d021727	Zm00001d002174	protein serine/threonine kinases;protein kinases;ATP binding;sugar binding;kinases;carbohydrate binding	S-locus lectin protein kinase family protein	S-locus lectin protein kinase family protein
15	OG0000000	Gh_D01G0255	Zm00001d021729	Zm00001d002174	protein serine/threonine kinases;protein kinases;ATP binding;sugar binding;kinases;carbohydrate binding	S-locus lectin protein kinase family protein	S-locus lectin protein kinase family protein
16	OG0000000	Gh_D01G0265	Zm00001d021727	Zm00001d002174	protein serine/threonine kinases;protein kinases;ATP binding;sugar binding;kinases;carbohydrate binding	S-locus lectin protein kinase family protein	S-locus lectin protein kinase family protein
17	OG0000000	Gh_D01G0265	Zm00001d021729	Zm00001d002174	protein serine/threonine kinases;protein kinases;ATP binding;sugar binding;kinases;carbohydrate binding	S-locus lectin protein kinase family protein	S-locus lectin protein kinase family protein
18	OG0000000	Gh_D01G0268	Zm00001d021727	Zm00001d002174	protein serine/threonine kinases;protein kinases;ATP binding;sugar binding;kinases;carbohydrate binding	S-locus lectin protein kinase family protein	S-locus lectin protein kinase family protein
19	OG0000000	Gh_D01G0268	Zm00001d021729	Zm00001d002174	protein serine/threonine kinases;protein kinases;ATP binding;sugar binding;kinases;carbohydrate binding	S-locus lectin protein kinase family protein	S-locus lectin protein kinase family protein
20	OG0000000	Gh_D01G0546	Zm00001d043257	Zm00001d002174	protein serine/threonine kinases;protein kinases;ATP binding;sugar binding;kinases;carbohydrate binding	S-locus lectin protein kinase family protein	S-locus lectin protein kinase family protein
21	OG0000000	Gh_D10G0184	Zm00001d043253	Zm00001d043256	protein serine/threonine kinases;protein kinases;ATP binding;sugar binding;kinases;carbohydrate binding	receptor kinase 3	receptor kinase 3
22	OG0000000	Gh_D10G0184	Zm00001d043256	Zm00001d032408	protein serine/threonine kinases;protein kinases;ATP binding;sugar binding;kinases;carbohydrate binding	receptor kinase 3	receptor kinase 3
23	OG0000000	Gh_D10G0184	Zm00001d043256	Zm00001d043256	protein serine/threonine kinases;protein kinases;ATP binding;sugar binding;kinases;carbohydrate binding	receptor kinase 3	receptor kinase 3
24	OG0000000	Gh_D10G0184	Zm00001d032408	Zm00001d043256	protein serine/threonine kinases;protein kinases;ATP binding;sugar binding;kinases;carbohydrate binding	receptor kinase 3	receptor kinase 3
25	OG0000000	Gh_D10G0184	Zm00001d021726	Zm00001d043256	protein serine/threonine kinases;protein kinases;ATP binding;sugar binding;kinases;carbohydrate binding	receptor kinase 3	receptor kinase 3
26	OG0000000	Gh_D10G0184	Zm00001d010700	Zm00001d043256	protein serine/threonine kinases;protein kinases;ATP binding;sugar binding;kinases;carbohydrate binding	receptor kinase 3	receptor kinase 3
27	OG0000000	Gh_D10G0184	Zm00001d012609	Zm00001d032408	protein serine/threonine kinases;protein kinases;ATP binding;sugar binding;kinases;carbohydrate binding	receptor kinase 3	receptor kinase 3
28	OG0000000	Gh_D10G0184	Zm00001d012609	Zm00001d043256	protein serine/threonine kinases;protein kinases;ATP binding;sugar binding;kinases;carbohydrate binding	receptor kinase 3	receptor kinase 3
29	OG0000000	Gh_D10G0184	Zm00001d043252	Zm00001d043256	protein serine/threonine kinases;protein kinases;ATP binding;sugar binding;kinases;carbohydrate binding	receptor kinase 3	receptor kinase 3
30	OG0000002	Gh_D01G0258	Zm00001d002167	Zm00001d012609	protein serine/threonine kinases;protein kinases;ATP binding;sugar binding;kinases;carbohydrate binding	S-locus lectin protein kinase family protein	receptor kinase 3
31	OG0000002	Gh_D08G0400	Zm00001d045945	NA	protein serine/threonine kinases;protein kinases;ATP binding;sugar binding;kinases;carbohydrate binding	S-locus lectin protein kinase family protein	N/A
32	OG0000002	Gh_D10G0156	Zm00001d021686	NA	protein serine/threonine kinases;protein kinases;ATP binding;sugar binding;kinases;carbohydrate binding	cysteine-rich RLK (RECEPTOR-like protein kinase) 10	N/A
33	OG0000002	Gh_D10G0156	Zm00001d006793	NA	protein serine/threonine kinases;protein kinases;ATP binding;sugar binding;kinases;carbohydrate binding	cysteine-rich RLK (RECEPTOR-like protein kinase) 25	N/A
34	OG0000002	Gh_D10G0156	Zm00001d021688	NA	protein serine/threonine kinases;protein kinases;ATP binding;sugar binding;kinases;carbohydrate binding	cysteine-rich RLK (RECEPTOR-like protein kinase) 10	N/A
35	OG0000002	Gh_D10G0156	Zm00001d035401	NA	protein serine/threonine kinases;protein kinases;ATP binding;sugar binding;kinases;carbohydrate binding	cysteine-rich RLK (RECEPTOR-like protein kinase) 10	N/A
36	OG0000002	Gh_D10G0156	Zm00001d035400	NA	protein serine/threonine kinases;protein kinases;ATP binding;sugar binding;kinases;carbohydrate binding	cysteine-rich RLK (RECEPTOR-like protein kinase) 25	N/A
37	OG0000002	Gh_D10G0156	Zm00001d021689	NA	protein serine/threonine kinases;protein kinases;ATP binding;sugar binding;kinases;carbohydrate binding	cysteine-rich RLK (RECEPTOR-like protein kinase) 10	N/A
38	OG0000002	Gh_D10G0156	Zm00001d006535	NA	protein serine/threonine kinases;protein kinases;ATP binding;sugar binding;kinases;carbohydrate binding	cysteine-rich RLK (RECEPTOR-like protein kinase) 10	N/A
39	OG0000002	Gh_D10G0156	Zm00001d021692	NA	protein serine/threonine kinases;protein kinases;ATP binding;sugar binding;kinases;carbohydrate binding	cysteine-rich RLK (RECEPTOR-like protein kinase) 25	N/A
40	OG0000002	Gh_D10G0156	Zm00001d006536	NA	protein serine/threonine kinases;protein kinases;ATP binding;sugar binding;kinases;carbohydrate binding	cysteine-rich RLK (RECEPTOR-like protein kinase) 25	N/A
41	OG0000002	Gh_D10G0156	Zm00001d013572	NA	protein serine/threonine kinases;protein kinases;ATP binding;sugar binding;kinases;carbohydrate binding	cysteine-rich RLK (RECEPTOR-like protein kinase) 6	N/A
42	OG0000003	Gh_A01G0358	Zm00001d039922	Zm00001d039920	Protein kinase superfamily protein	Protein kinase superfamily protein	Protein kinase superfamily protein
43	OG0000003	Gh_A01G0358	Zm00001d008586	Zm00001d039920	Protein kinase superfamily protein	Protein kinase superfamily protein	Protein kinase superfamily protein
44	OG0000003	Gh_A01G0358	Zm00001d039929	Zm00001d039920	Protein kinase superfamily protein	Protein kinase superfamily protein	Protein kinase superfamily protein
45	OG0000003	Gh_A01G0358	Zm00001d039923	Zm00001d039920	Protein kinase superfamily protein	suppressor of npr1-1 constitutive 4	Protein kinase superfamily protein
46	OG0000003	Gh_A01G0358	Zm00001d039921	Zm00001d039920	Protein kinase superfamily protein	Protein kinase superfamily protein	Protein kinase superfamily protein
47	OG0000003	Gh_A01G0358	Zm00001d008585	Zm00001d039920	Protein kinase superfamily protein	Protein kinase superfamily protein	Protein kinase superfamily protein
48	OG0000003	Gh_A01G0358	Zm00001d011628	Zm00001d039920	Protein kinase superfamily protein	Protein kinase superfamily protein	Protein kinase superfamily protein
49	OG0000003	Gh_A01G0358	Zm00001d011628	Zm00001d011629	Protein kinase superfamily protein	Protein kinase superfamily protein	Protein kinase superfamily protein
50	OG0000003	Gh_A01G0358	Zm00001d011629	Zm00001d039920	Protein kinase superfamily protein	Protein kinase superfamily protein	Protein kinase superfamily protein
51	OG0000003	Gh_A01G0359	Zm00001d011628	NA	Protein kinase superfamily protein	Protein kinase superfamily protein	N/A
52	OG0000003	Gh_A09G1584	Zm00001d011628	Zm00001d008585	receptor serine/threonine kinase, putative	Protein kinase superfamily protein	Protein kinase superfamily protein
53	OG0000003	Gh_A09G1584	Zm00001d011628	Zm00001d039923	receptor serine/threonine kinase, putative	Protein kinase superfamily protein	suppressor of npr1-1 constitutive 4
54	OG0000003	Gh_A09G1585	Zm00001d011628	NA	Protein kinase superfamily protein	Protein kinase superfamily protein	N/A
55	OG0000003	Gh_A11G1521	Zm00001d039922	Zm00001d011628	PR5-like receptor kinase	Protein kinase superfamily protein	Protein kinase superfamily protein
56	OG0000003	Gh_A11G1521	Zm00001d008586	Zm00001d011628	PR5-like receptor kinase	Protein kinase superfamily protein	Protein kinase superfamily protein
57	OG0000003	Gh_A11G1521	Zm00001d039929	Zm00001d011628	PR5-like receptor kinase	Protein kinase superfamily protein	Protein kinase superfamily protein
58	OG0000003	Gh_A11G1521	Zm00001d039923	Zm00001d011628	PR5-like receptor kinase	suppressor of npr1-1 constitutive 4	Protein kinase superfamily protein
59	OG0000003	Gh_A11G1521	Zm00001d039921	Zm00001d011628	PR5-like receptor kinase	Protein kinase superfamily protein	Protein kinase superfamily protein
60	OG0000003	Gh_A11G1521	Zm00001d008585	Zm00001d011628	PR5-like receptor kinase	Protein kinase superfamily protein	Protein kinase superfamily protein
61	OG0000003	Gh_A11G1521	Zm00001d011628	Zm00001d011628	PR5-like receptor kinase	Protein kinase superfamily protein	Protein kinase superfamily protein
62	OG0000003	Gh_A11G1521	Zm00001d011629	Zm00001d011628	PR5-like receptor kinase	Protein kinase superfamily protein	Protein kinase superfamily protein
63	OG0000003	Gh_A11G1522	Zm00001d011628	NA	Protein kinase superfamily protein	Protein kinase superfamily protein	N/A
64	OG0000003	Gh_A11G1524	Zm00001d011628	NA	Protein kinase superfamily protein	Protein kinase superfamily protein	N/A
65	OG0000003	Gh_A11G1525	Zm00001d011628	NA	Protein kinase superfamily protein	Protein kinase superfamily protein	N/A
66	OG0000003	Gh_A11G1529	Zm00001d011628	NA	Protein kinase superfamily protein	Protein kinase superfamily protein	N/A
67	OG0000003	Gh_D01G0388	Zm00001d039922	Zm00001d039920	Protein kinase superfamily protein	Protein kinase superfamily protein	Protein kinase superfamily protein
68	OG0000003	Gh_D01G0388	Zm00001d008586	Zm00001d039920	Protein kinase superfamily protein	Protein kinase superfamily protein	Protein kinase superfamily protein
69	OG0000003	Gh_D01G0388	Zm00001d039929	Zm00001d039920	Protein kinase superfamily protein	Protein kinase superfamily protein	Protein kinase superfamily protein
70	OG0000003	Gh_D01G0388	Zm00001d039923	Zm00001d039920	Protein kinase superfamily protein	suppressor of npr1-1 constitutive 4	Protein kinase superfamily protein
71	OG0000003	Gh_D01G0388	Zm00001d039921	Zm00001d039920	Protein kinase superfamily protein	Protein kinase superfamily protein	Protein kinase superfamily protein
72	OG0000003	Gh_D01G0388	Zm00001d008585	Zm00001d039920	Protein kinase superfamily protein	Protein kinase superfamily protein	Protein kinase superfamily protein
73	OG0000003	Gh_D01G0388	Zm00001d011628	Zm00001d039920	Protein kinase superfamily protein	Protein kinase superfamily protein	Protein kinase superfamily protein
74	OG0000003	Gh_D01G0388	Zm00001d011628	Zm00001d011629	Protein kinase superfamily protein	Protein kinase superfamily protein	Protein kinase superfamily protein
75	OG0000003	Gh_D01G0388	Zm00001d011629	Zm00001d039920	Protein kinase superfamily protein	Protein kinase superfamily protein	Protein kinase superfamily protein
76	OG0000003	Gh_D01G0389	Zm00001d011628	NA	Protein kinase superfamily protein	Protein kinase superfamily protein	N/A
77	OG0000003	Gh_D09G0491	Zm00001d011628	NA	Protein kinase superfamily protein	Protein kinase superfamily protein	N/A
78	OG0000003	Gh_D09G0492	Zm00001d011628	Zm00001d039923	PR5-like receptor kinase	Protein kinase superfamily protein	suppressor of npr1-1 constitutive 4
79	OG0000003	Gh_D09G0492	Zm00001d011628	Zm00001d008585	PR5-like receptor kinase	Protein kinase superfamily protein	Protein kinase superfamily protein
80	OG0000003	Gh_D09G1675	Zm00001d011628	NA	Protein kinase superfamily protein	Protein kinase superfamily protein	N/A
81	OG0000003	Gh_D10G1175	Zm00001d011628	Zm00001d043798	Protein kinase superfamily protein	Protein kinase superfamily protein	Protein kinase superfamily protein
82	OG0000003	Gh_D11G1682	Zm00001d011628	Zm00001d008479	suppressor of npr1-1 constitutive 4	Protein kinase superfamily protein	receptor serine/threonine kinase, putative
83	OG0000003	Gh_D11G1685	Zm00001d011628	NA	Protein kinase superfamily protein	Protein kinase superfamily protein	N/A
84	OG0000003	Gh_D11G1689	Zm00001d011628	NA	Protein kinase superfamily protein	Protein kinase superfamily protein	N/A
85	OG0000003	Gh_D11G1690	Zm00001d011628	NA	Protein kinase superfamily protein	Protein kinase superfamily protein	N/A
86	OG0000003	Gh_D11G1691	Zm00001d039922	Zm00001d039920	Protein kinase superfamily protein	Protein kinase superfamily protein	Protein kinase superfamily protein
87	OG0000003	Gh_D11G1691	Zm00001d008586	Zm00001d039920	Protein kinase superfamily protein	Protein kinase superfamily protein	Protein kinase superfamily protein
88	OG0000003	Gh_D11G1691	Zm00001d039929	Zm00001d039920	Protein kinase superfamily protein	Protein kinase superfamily protein	Protein kinase superfamily protein
89	OG0000003	Gh_D11G1691	Zm00001d039923	Zm00001d039920	Protein kinase superfamily protein	suppressor of npr1-1 constitutive 4	Protein kinase superfamily protein
90	OG0000003	Gh_D11G1691	Zm00001d039921	Zm00001d039920	Protein kinase superfamily protein	Protein kinase superfamily protein	Protein kinase superfamily protein
91	OG0000003	Gh_D11G1691	Zm00001d008585	Zm00001d039920	Protein kinase superfamily protein	Protein kinase superfamily protein	Protein kinase superfamily protein
92	OG0000003	Gh_D11G1691	Zm00001d011628	Zm00001d039920	Protein kinase superfamily protein	Protein kinase superfamily protein	Protein kinase superfamily protein
93	OG0000003	Gh_D11G1691	Zm00001d011628	Zm00001d011629	Protein kinase superfamily protein	Protein kinase superfamily protein	Protein kinase superfamily protein
94	OG0000003	Gh_D11G1691	Zm00001d011629	Zm00001d039920	Protein kinase superfamily protein	Protein kinase superfamily protein	Protein kinase superfamily protein
95	OG0000003	Gh_D13G0117	Zm00001d011628	Zm00001d039921	Protein kinase superfamily protein	Protein kinase superfamily protein	Protein kinase superfamily protein
96	OG0000009	Gh_A11G1601	Zm00001d053220	NA	myb domain protein 4	myb domain protein 7	N/A
97	OG0000009	Gh_D11G1759	Zm00001d053220	NA	myb domain protein 4	myb domain protein 7	N/A
98	OG0000012	Gh_A11G1221	Zm00001d032747	Zm00001d032745	Leucine-rich repeat receptor-like protein kinase family protein	Leucine-rich repeat receptor-like protein kinase family protein	Leucine-rich repeat receptor-like protein kinase family protein
99	OG0000012	Gh_A11G1221	Zm00001d032747	Zm00001d014063	Leucine-rich repeat receptor-like protein kinase family protein	Leucine-rich repeat receptor-like protein kinase family protein	Protein kinase family protein with leucine-rich repeat domain
100	OG0000012	Gh_A11G1221	Zm00001d014063	Zm00001d032745	Leucine-rich repeat receptor-like protein kinase family protein	Protein kinase family protein with leucine-rich repeat domain	Leucine-rich repeat receptor-like protein kinase family protein
101	OG0000012	Gh_A11G1221	Zm00001d014063	Zm00001d014063	Leucine-rich repeat receptor-like protein kinase family protein	Protein kinase family protein with leucine-rich repeat domain	Protein kinase family protein with leucine-rich repeat domain
102	OG0000012	Gh_A11G1221	Zm00001d032745	Zm00001d032745	Leucine-rich repeat receptor-like protein kinase family protein	Leucine-rich repeat receptor-like protein kinase family protein	Leucine-rich repeat receptor-like protein kinase family protein
103	OG0000012	Gh_A11G1221	Zm00001d032745	Zm00001d014063	Leucine-rich repeat receptor-like protein kinase family protein	Leucine-rich repeat receptor-like protein kinase family protein	Protein kinase family protein with leucine-rich repeat domain
104	OG0000014	Gh_A07G1257	Zm00001d053249	Zm00001d002295	RmlC-like cupins superfamily protein	RmlC-like cupins superfamily protein	germin-like protein 2
105	OG0000014	Gh_A11G2182	Zm00001d053249	Zm00001d002295	RmlC-like cupins superfamily protein	RmlC-like cupins superfamily protein	germin-like protein 2
106	OG0000014	Gh_A11G2183	Zm00001d053249	Zm00001d002295	RmlC-like cupins superfamily protein	RmlC-like cupins superfamily protein	germin-like protein 2
107	OG0000014	Gh_A11G2188	Zm00001d053249	Zm00001d002295	RmlC-like cupins superfamily protein	RmlC-like cupins superfamily protein	germin-like protein 2
108	OG0000014	Gh_A13G1432	Zm00001d053249	Zm00001d002295	RmlC-like cupins superfamily protein	RmlC-like cupins superfamily protein	germin-like protein 2
109	OG0000014	Gh_D07G1367	Zm00001d053249	Zm00001d002295	RmlC-like cupins superfamily protein	RmlC-like cupins superfamily protein	germin-like protein 2
110	OG0000014	Gh_D11G2491	Zm00001d053249	Zm00001d002295	RmlC-like cupins superfamily protein	RmlC-like cupins superfamily protein	germin-like protein 2
111	OG0000014	Gh_D11G2496	Zm00001d053249	Zm00001d002295	RmlC-like cupins superfamily protein	RmlC-like cupins superfamily protein	germin-like protein 2
112	OG0000014	Gh_D13G1767	Zm00001d053249	Zm00001d002295	RmlC-like cupins superfamily protein	RmlC-like cupins superfamily protein	germin-like protein 2
113	OG0000014	Gh_D13G1770	Zm00001d053249	Zm00001d002295	RmlC-like cupins superfamily protein	RmlC-like cupins superfamily protein	germin-like protein 2
114	OG0000014	Gh_D13G1779	Zm00001d053249	Zm00001d002295	RmlC-like cupins superfamily protein	RmlC-like cupins superfamily protein	germin-like protein 2
115	OG0000014	Gh_Sca007146G01	Zm00001d053249	Zm00001d002295	RmlC-like cupins superfamily protein	RmlC-like cupins superfamily protein	germin-like protein 2
116	OG0000017	Gh_A07G0525	Zm00001d033516	NA	sulphotransferase 12	sulfotransferase 2A	N/A
117	OG0000017	Gh_A07G0525	Zm00001d033514	NA	sulphotransferase 12	sulfotransferase 4A	N/A
118	OG0000017	Gh_A07G0525	Zm00001d042123	NA	sulphotransferase 12	P-loop containing nucleoside triphosphate hydrolases superfamily protein	N/A
119	OG0000017	Gh_A07G0525	Zm00001d042122	NA	sulphotransferase 12	P-loop containing nucleoside triphosphate hydrolases superfamily protein	N/A
120	OG0000017	Gh_A07G0525	Zm00001d042125	NA	sulphotransferase 12	sulfotransferase 4B	N/A
121	OG0000017	Gh_D03G0378	Zm00001d033516	NA	sulfotransferase 16	sulfotransferase 2A	N/A
122	OG0000017	Gh_D03G0378	Zm00001d033514	NA	sulfotransferase 16	sulfotransferase 4A	N/A
123	OG0000017	Gh_D03G0378	Zm00001d042123	NA	sulfotransferase 16	P-loop containing nucleoside triphosphate hydrolases superfamily protein	N/A
124	OG0000017	Gh_D03G0378	Zm00001d042122	NA	sulfotransferase 16	P-loop containing nucleoside triphosphate hydrolases superfamily protein	N/A
125	OG0000017	Gh_D03G0378	Zm00001d042125	NA	sulfotransferase 16	sulfotransferase 4B	N/A
126	OG0000017	Gh_D03G0383	Zm00001d033516	NA	sulfotransferase 16	sulfotransferase 2A	N/A
127	OG0000017	Gh_D03G0383	Zm00001d033514	NA	sulfotransferase 16	sulfotransferase 4A	N/A
128	OG0000017	Gh_D03G0383	Zm00001d042123	NA	sulfotransferase 16	P-loop containing nucleoside triphosphate hydrolases superfamily protein	N/A
129	OG0000017	Gh_D03G0383	Zm00001d042122	NA	sulfotransferase 16	P-loop containing nucleoside triphosphate hydrolases superfamily protein	N/A
130	OG0000017	Gh_D03G0383	Zm00001d042125	NA	sulfotransferase 16	sulfotransferase 4B	N/A
131	OG0000017	Gh_D03G0384	Zm00001d033516	NA	sulfotransferase 16	sulfotransferase 2A	N/A
132	OG0000017	Gh_D03G0384	Zm00001d033514	NA	sulfotransferase 16	sulfotransferase 4A	N/A
133	OG0000017	Gh_D03G0384	Zm00001d042123	NA	sulfotransferase 16	P-loop containing nucleoside triphosphate hydrolases superfamily protein	N/A
134	OG0000017	Gh_D03G0384	Zm00001d042122	NA	sulfotransferase 16	P-loop containing nucleoside triphosphate hydrolases superfamily protein	N/A
135	OG0000017	Gh_D03G0384	Zm00001d042125	NA	sulfotransferase 16	sulfotransferase 4B	N/A
136	OG0000017	Gh_D04G1950	Zm00001d033516	NA	sulfotransferase 2A	sulfotransferase 2A	N/A
137	OG0000017	Gh_D04G1950	Zm00001d033514	NA	sulfotransferase 2A	sulfotransferase 4A	N/A
138	OG0000017	Gh_D04G1950	Zm00001d042123	NA	sulfotransferase 2A	P-loop containing nucleoside triphosphate hydrolases superfamily protein	N/A
139	OG0000017	Gh_D04G1950	Zm00001d042122	NA	sulfotransferase 2A	P-loop containing nucleoside triphosphate hydrolases superfamily protein	N/A
140	OG0000017	Gh_D04G1950	Zm00001d042125	NA	sulfotransferase 2A	sulfotransferase 4B	N/A
141	OG0000017	Gh_D11G2357	Zm00001d033516	NA	sulfotransferase 2A	sulfotransferase 2A	N/A
142	OG0000017	Gh_D11G2357	Zm00001d033514	NA	sulfotransferase 2A	sulfotransferase 4A	N/A
143	OG0000017	Gh_D11G2357	Zm00001d042123	NA	sulfotransferase 2A	P-loop containing nucleoside triphosphate hydrolases superfamily protein	N/A
144	OG0000017	Gh_D11G2357	Zm00001d042122	NA	sulfotransferase 2A	P-loop containing nucleoside triphosphate hydrolases superfamily protein	N/A
145	OG0000017	Gh_D11G2357	Zm00001d042125	NA	sulfotransferase 2A	sulfotransferase 4B	N/A
146	OG0000021	Gh_A01G1903	Zm00001d030759	Zm00001d030759	Concanavalin A-like lectin protein kinase family protein	Concanavalin A-like lectin protein kinase family protein	Concanavalin A-like lectin protein kinase family protein
147	OG0000021	Gh_A04G0718	Zm00001d025921	Zm00001d034217	Concanavalin A-like lectin protein kinase family protein	receptor lectin kinase	receptor lectin kinase
148	OG0000021	Gh_A04G0718	Zm00001d021896	Zm00001d034217	Concanavalin A-like lectin protein kinase family protein	receptor lectin kinase	receptor lectin kinase
149	OG0000021	Gh_A04G0718	Zm00001d028455	Zm00001d034217	Concanavalin A-like lectin protein kinase family protein	Concanavalin A-like lectin protein kinase family protein	receptor lectin kinase
150	OG0000021	Gh_A04G0718	Zm00001d021897	Zm00001d034217	Concanavalin A-like lectin protein kinase family protein	Concanavalin A-like lectin protein kinase family protein	receptor lectin kinase
151	OG0000021	Gh_A04G0718	Zm00001d025920	Zm00001d034217	Concanavalin A-like lectin protein kinase family protein	receptor lectin kinase	receptor lectin kinase
152	OG0000021	Gh_A04G0718	Zm00001d028454	Zm00001d034217	Concanavalin A-like lectin protein kinase family protein	receptor lectin kinase	receptor lectin kinase
153	OG0000021	Gh_A04G0718	Zm00001d032870	Zm00001d034217	Concanavalin A-like lectin protein kinase family protein	receptor lectin kinase	receptor lectin kinase
154	OG0000021	Gh_A04G0718	Zm00001d032868	Zm00001d034217	Concanavalin A-like lectin protein kinase family protein	receptor lectin kinase	receptor lectin kinase
155	OG0000021	Gh_A04G0718	Zm00001d032869	Zm00001d034217	Concanavalin A-like lectin protein kinase family protein	receptor lectin kinase	receptor lectin kinase
156	OG0000021	Gh_A04G0718	Zm00001d019333	Zm00001d034217	Concanavalin A-like lectin protein kinase family protein	receptor lectin kinase	receptor lectin kinase
157	OG0000021	Gh_A04G0718	Zm00001d016009	Zm00001d034217	Concanavalin A-like lectin protein kinase family protein	receptor lectin kinase	receptor lectin kinase
158	OG0000021	Gh_A04G0718	Zm00001d019413	Zm00001d034217	Concanavalin A-like lectin protein kinase family protein	receptor lectin kinase	receptor lectin kinase
159	OG0000021	Gh_A04G0718	Zm00001d045839	Zm00001d034217	Concanavalin A-like lectin protein kinase family protein	Concanavalin A-like lectin protein kinase family protein	receptor lectin kinase
160	OG0000021	Gh_A04G0718	Zm00001d007843	Zm00001d034217	Concanavalin A-like lectin protein kinase family protein	Concanavalin A-like lectin protein kinase family protein	receptor lectin kinase
161	OG0000021	Gh_A04G0718	Zm00001d037398	Zm00001d034217	Concanavalin A-like lectin protein kinase family protein	receptor lectin kinase	receptor lectin kinase
162	OG0000021	Gh_A04G0718	Zm00001d019411	Zm00001d034217	Concanavalin A-like lectin protein kinase family protein	Concanavalin A-like lectin protein kinase family protein	receptor lectin kinase
163	OG0000021	Gh_A04G0718	Zm00001d053322	Zm00001d034217	Concanavalin A-like lectin protein kinase family protein	Concanavalin A-like lectin protein kinase family protein	receptor lectin kinase
164	OG0000021	Gh_A04G0718	Zm00001d045838	Zm00001d034217	Concanavalin A-like lectin protein kinase family protein	Concanavalin A-like lectin protein kinase family protein	receptor lectin kinase
165	OG0000021	Gh_A04G0718	Zm00001d037397	Zm00001d034217	Concanavalin A-like lectin protein kinase family protein	Concanavalin A-like lectin protein kinase family protein	receptor lectin kinase
166	OG0000021	Gh_A04G0718	Zm00001d019334	Zm00001d034217	Concanavalin A-like lectin protein kinase family protein	receptor lectin kinase	receptor lectin kinase
167	OG0000021	Gh_A04G0718	Zm00001d034217	Zm00001d025920	Concanavalin A-like lectin protein kinase family protein	receptor lectin kinase	receptor lectin kinase
168	OG0000021	Gh_A04G0718	Zm00001d034217	Zm00001d028454	Concanavalin A-like lectin protein kinase family protein	receptor lectin kinase	receptor lectin kinase
169	OG0000021	Gh_A04G0718	Zm00001d034217	Zm00001d032868	Concanavalin A-like lectin protein kinase family protein	receptor lectin kinase	receptor lectin kinase
170	OG0000021	Gh_A04G0718	Zm00001d034217	Zm00001d032869	Concanavalin A-like lectin protein kinase family protein	receptor lectin kinase	receptor lectin kinase
171	OG0000021	Gh_A04G0718	Zm00001d034217	Zm00001d032870	Concanavalin A-like lectin protein kinase family protein	receptor lectin kinase	receptor lectin kinase
172	OG0000021	Gh_A04G0718	Zm00001d034217	Zm00001d034217	Concanavalin A-like lectin protein kinase family protein	receptor lectin kinase	receptor lectin kinase
173	OG0000021	Gh_A04G0718	Zm00001d034217	Zm00001d021896	Concanavalin A-like lectin protein kinase family protein	receptor lectin kinase	receptor lectin kinase
174	OG0000021	Gh_A04G0718	Zm00001d034217	Zm00001d021897	Concanavalin A-like lectin protein kinase family protein	receptor lectin kinase	Concanavalin A-like lectin protein kinase family protein
175	OG0000021	Gh_A04G0720	Zm00001d030759	Zm00001d030759	Concanavalin A-like lectin protein kinase family protein	Concanavalin A-like lectin protein kinase family protein	Concanavalin A-like lectin protein kinase family protein
176	OG0000021	Gh_A04G0792	Zm00001d025921	Zm00001d034217	Concanavalin A-like lectin protein kinase family protein	receptor lectin kinase	receptor lectin kinase
177	OG0000021	Gh_A04G0792	Zm00001d021896	Zm00001d034217	Concanavalin A-like lectin protein kinase family protein	receptor lectin kinase	receptor lectin kinase
178	OG0000021	Gh_A04G0792	Zm00001d028455	Zm00001d034217	Concanavalin A-like lectin protein kinase family protein	Concanavalin A-like lectin protein kinase family protein	receptor lectin kinase
179	OG0000021	Gh_A04G0792	Zm00001d021897	Zm00001d034217	Concanavalin A-like lectin protein kinase family protein	Concanavalin A-like lectin protein kinase family protein	receptor lectin kinase
180	OG0000021	Gh_A04G0792	Zm00001d025920	Zm00001d034217	Concanavalin A-like lectin protein kinase family protein	receptor lectin kinase	receptor lectin kinase
181	OG0000021	Gh_A04G0792	Zm00001d028454	Zm00001d034217	Concanavalin A-like lectin protein kinase family protein	receptor lectin kinase	receptor lectin kinase
182	OG0000021	Gh_A04G0792	Zm00001d032870	Zm00001d034217	Concanavalin A-like lectin protein kinase family protein	receptor lectin kinase	receptor lectin kinase
183	OG0000021	Gh_A04G0792	Zm00001d032868	Zm00001d034217	Concanavalin A-like lectin protein kinase family protein	receptor lectin kinase	receptor lectin kinase
184	OG0000021	Gh_A04G0792	Zm00001d032869	Zm00001d034217	Concanavalin A-like lectin protein kinase family protein	receptor lectin kinase	receptor lectin kinase
185	OG0000021	Gh_A04G0792	Zm00001d019333	Zm00001d034217	Concanavalin A-like lectin protein kinase family protein	receptor lectin kinase	receptor lectin kinase
186	OG0000021	Gh_A04G0792	Zm00001d016009	Zm00001d034217	Concanavalin A-like lectin protein kinase family protein	receptor lectin kinase	receptor lectin kinase
187	OG0000021	Gh_A04G0792	Zm00001d019413	Zm00001d034217	Concanavalin A-like lectin protein kinase family protein	receptor lectin kinase	receptor lectin kinase
188	OG0000021	Gh_A04G0792	Zm00001d045839	Zm00001d034217	Concanavalin A-like lectin protein kinase family protein	Concanavalin A-like lectin protein kinase family protein	receptor lectin kinase
189	OG0000021	Gh_A04G0792	Zm00001d007843	Zm00001d034217	Concanavalin A-like lectin protein kinase family protein	Concanavalin A-like lectin protein kinase family protein	receptor lectin kinase
190	OG0000021	Gh_A04G0792	Zm00001d037398	Zm00001d034217	Concanavalin A-like lectin protein kinase family protein	receptor lectin kinase	receptor lectin kinase
191	OG0000021	Gh_A04G0792	Zm00001d019411	Zm00001d034217	Concanavalin A-like lectin protein kinase family protein	Concanavalin A-like lectin protein kinase family protein	receptor lectin kinase
192	OG0000021	Gh_A04G0792	Zm00001d053322	Zm00001d034217	Concanavalin A-like lectin protein kinase family protein	Concanavalin A-like lectin protein kinase family protein	receptor lectin kinase
193	OG0000021	Gh_A04G0792	Zm00001d045838	Zm00001d034217	Concanavalin A-like lectin protein kinase family protein	Concanavalin A-like lectin protein kinase family protein	receptor lectin kinase
194	OG0000021	Gh_A04G0792	Zm00001d037397	Zm00001d034217	Concanavalin A-like lectin protein kinase family protein	Concanavalin A-like lectin protein kinase family protein	receptor lectin kinase
195	OG0000021	Gh_A04G0792	Zm00001d019334	Zm00001d034217	Concanavalin A-like lectin protein kinase family protein	receptor lectin kinase	receptor lectin kinase
196	OG0000021	Gh_A04G0792	Zm00001d034217	Zm00001d025920	Concanavalin A-like lectin protein kinase family protein	receptor lectin kinase	receptor lectin kinase
197	OG0000021	Gh_A04G0792	Zm00001d034217	Zm00001d028454	Concanavalin A-like lectin protein kinase family protein	receptor lectin kinase	receptor lectin kinase
198	OG0000021	Gh_A04G0792	Zm00001d034217	Zm00001d032868	Concanavalin A-like lectin protein kinase family protein	receptor lectin kinase	receptor lectin kinase
199	OG0000021	Gh_A04G0792	Zm00001d034217	Zm00001d032869	Concanavalin A-like lectin protein kinase family protein	receptor lectin kinase	receptor lectin kinase
200	OG0000021	Gh_A04G0792	Zm00001d034217	Zm00001d032870	Concanavalin A-like lectin protein kinase family protein	receptor lectin kinase	receptor lectin kinase
201	OG0000021	Gh_A04G0792	Zm00001d034217	Zm00001d034217	Concanavalin A-like lectin protein kinase family protein	receptor lectin kinase	receptor lectin kinase
202	OG0000021	Gh_A04G0792	Zm00001d034217	Zm00001d021896	Concanavalin A-like lectin protein kinase family protein	receptor lectin kinase	receptor lectin kinase
203	OG0000021	Gh_A04G0792	Zm00001d034217	Zm00001d021897	Concanavalin A-like lectin protein kinase family protein	receptor lectin kinase	Concanavalin A-like lectin protein kinase family protein
204	OG0000021	Gh_A05G2604	Zm00001d030759	NA	Concanavalin A-like lectin protein kinase family protein	Concanavalin A-like lectin protein kinase family protein	N/A
205	OG0000021	Gh_A07G0372	Zm00001d025921	Zm00001d034217	Concanavalin A-like lectin protein kinase family protein	receptor lectin kinase	receptor lectin kinase
206	OG0000021	Gh_A07G0372	Zm00001d021896	Zm00001d034217	Concanavalin A-like lectin protein kinase family protein	receptor lectin kinase	receptor lectin kinase
207	OG0000021	Gh_A07G0372	Zm00001d028455	Zm00001d034217	Concanavalin A-like lectin protein kinase family protein	Concanavalin A-like lectin protein kinase family protein	receptor lectin kinase
208	OG0000021	Gh_A07G0372	Zm00001d021897	Zm00001d034217	Concanavalin A-like lectin protein kinase family protein	Concanavalin A-like lectin protein kinase family protein	receptor lectin kinase
209	OG0000021	Gh_A07G0372	Zm00001d025920	Zm00001d034217	Concanavalin A-like lectin protein kinase family protein	receptor lectin kinase	receptor lectin kinase
210	OG0000021	Gh_A07G0372	Zm00001d028454	Zm00001d034217	Concanavalin A-like lectin protein kinase family protein	receptor lectin kinase	receptor lectin kinase
211	OG0000021	Gh_A07G0372	Zm00001d032870	Zm00001d034217	Concanavalin A-like lectin protein kinase family protein	receptor lectin kinase	receptor lectin kinase
212	OG0000021	Gh_A07G0372	Zm00001d032868	Zm00001d034217	Concanavalin A-like lectin protein kinase family protein	receptor lectin kinase	receptor lectin kinase
213	OG0000021	Gh_A07G0372	Zm00001d032869	Zm00001d034217	Concanavalin A-like lectin protein kinase family protein	receptor lectin kinase	receptor lectin kinase
214	OG0000021	Gh_A07G0372	Zm00001d019333	Zm00001d034217	Concanavalin A-like lectin protein kinase family protein	receptor lectin kinase	receptor lectin kinase
215	OG0000021	Gh_A07G0372	Zm00001d016009	Zm00001d034217	Concanavalin A-like lectin protein kinase family protein	receptor lectin kinase	receptor lectin kinase
216	OG0000021	Gh_A07G0372	Zm00001d019413	Zm00001d034217	Concanavalin A-like lectin protein kinase family protein	receptor lectin kinase	receptor lectin kinase
217	OG0000021	Gh_A07G0372	Zm00001d045839	Zm00001d034217	Concanavalin A-like lectin protein kinase family protein	Concanavalin A-like lectin protein kinase family protein	receptor lectin kinase
218	OG0000021	Gh_A07G0372	Zm00001d007843	Zm00001d034217	Concanavalin A-like lectin protein kinase family protein	Concanavalin A-like lectin protein kinase family protein	receptor lectin kinase
219	OG0000021	Gh_A07G0372	Zm00001d037398	Zm00001d034217	Concanavalin A-like lectin protein kinase family protein	receptor lectin kinase	receptor lectin kinase
220	OG0000021	Gh_A07G0372	Zm00001d019411	Zm00001d034217	Concanavalin A-like lectin protein kinase family protein	Concanavalin A-like lectin protein kinase family protein	receptor lectin kinase
221	OG0000021	Gh_A07G0372	Zm00001d053322	Zm00001d034217	Concanavalin A-like lectin protein kinase family protein	Concanavalin A-like lectin protein kinase family protein	receptor lectin kinase
222	OG0000021	Gh_A07G0372	Zm00001d045838	Zm00001d034217	Concanavalin A-like lectin protein kinase family protein	Concanavalin A-like lectin protein kinase family protein	receptor lectin kinase
223	OG0000021	Gh_A07G0372	Zm00001d037397	Zm00001d034217	Concanavalin A-like lectin protein kinase family protein	Concanavalin A-like lectin protein kinase family protein	receptor lectin kinase
224	OG0000021	Gh_A07G0372	Zm00001d019334	Zm00001d034217	Concanavalin A-like lectin protein kinase family protein	receptor lectin kinase	receptor lectin kinase
225	OG0000021	Gh_A07G0372	Zm00001d034217	Zm00001d021896	Concanavalin A-like lectin protein kinase family protein	receptor lectin kinase	receptor lectin kinase
226	OG0000021	Gh_A07G0372	Zm00001d034217	Zm00001d025920	Concanavalin A-like lectin protein kinase family protein	receptor lectin kinase	receptor lectin kinase
227	OG0000021	Gh_A07G0372	Zm00001d034217	Zm00001d028454	Concanavalin A-like lectin protein kinase family protein	receptor lectin kinase	receptor lectin kinase
228	OG0000021	Gh_A07G0372	Zm00001d034217	Zm00001d032868	Concanavalin A-like lectin protein kinase family protein	receptor lectin kinase	receptor lectin kinase
229	OG0000021	Gh_A07G0372	Zm00001d034217	Zm00001d032869	Concanavalin A-like lectin protein kinase family protein	receptor lectin kinase	receptor lectin kinase
230	OG0000021	Gh_A07G0372	Zm00001d034217	Zm00001d032870	Concanavalin A-like lectin protein kinase family protein	receptor lectin kinase	receptor lectin kinase
231	OG0000021	Gh_A07G0372	Zm00001d034217	Zm00001d034217	Concanavalin A-like lectin protein kinase family protein	receptor lectin kinase	receptor lectin kinase
232	OG0000021	Gh_A07G0372	Zm00001d034217	Zm00001d021897	Concanavalin A-like lectin protein kinase family protein	receptor lectin kinase	Concanavalin A-like lectin protein kinase family protein
233	OG0000021	Gh_A09G1440	Zm00001d025921	Zm00001d034217	Concanavalin A-like lectin protein kinase family protein	receptor lectin kinase	receptor lectin kinase
234	OG0000021	Gh_A09G1440	Zm00001d021896	Zm00001d034217	Concanavalin A-like lectin protein kinase family protein	receptor lectin kinase	receptor lectin kinase
235	OG0000021	Gh_A09G1440	Zm00001d028455	Zm00001d034217	Concanavalin A-like lectin protein kinase family protein	Concanavalin A-like lectin protein kinase family protein	receptor lectin kinase
236	OG0000021	Gh_A09G1440	Zm00001d021897	Zm00001d034217	Concanavalin A-like lectin protein kinase family protein	Concanavalin A-like lectin protein kinase family protein	receptor lectin kinase
237	OG0000021	Gh_A09G1440	Zm00001d025920	Zm00001d034217	Concanavalin A-like lectin protein kinase family protein	receptor lectin kinase	receptor lectin kinase
238	OG0000021	Gh_A09G1440	Zm00001d028454	Zm00001d034217	Concanavalin A-like lectin protein kinase family protein	receptor lectin kinase	receptor lectin kinase
239	OG0000021	Gh_A09G1440	Zm00001d032870	Zm00001d034217	Concanavalin A-like lectin protein kinase family protein	receptor lectin kinase	receptor lectin kinase
240	OG0000021	Gh_A09G1440	Zm00001d032868	Zm00001d034217	Concanavalin A-like lectin protein kinase family protein	receptor lectin kinase	receptor lectin kinase
241	OG0000021	Gh_A09G1440	Zm00001d032869	Zm00001d034217	Concanavalin A-like lectin protein kinase family protein	receptor lectin kinase	receptor lectin kinase
242	OG0000021	Gh_A09G1440	Zm00001d019333	Zm00001d034217	Concanavalin A-like lectin protein kinase family protein	receptor lectin kinase	receptor lectin kinase
243	OG0000021	Gh_A09G1440	Zm00001d016009	Zm00001d034217	Concanavalin A-like lectin protein kinase family protein	receptor lectin kinase	receptor lectin kinase
244	OG0000021	Gh_A09G1440	Zm00001d019413	Zm00001d034217	Concanavalin A-like lectin protein kinase family protein	receptor lectin kinase	receptor lectin kinase
245	OG0000021	Gh_A09G1440	Zm00001d045839	Zm00001d034217	Concanavalin A-like lectin protein kinase family protein	Concanavalin A-like lectin protein kinase family protein	receptor lectin kinase
246	OG0000021	Gh_A09G1440	Zm00001d007843	Zm00001d034217	Concanavalin A-like lectin protein kinase family protein	Concanavalin A-like lectin protein kinase family protein	receptor lectin kinase
247	OG0000021	Gh_A09G1440	Zm00001d037398	Zm00001d034217	Concanavalin A-like lectin protein kinase family protein	receptor lectin kinase	receptor lectin kinase
248	OG0000021	Gh_A09G1440	Zm00001d019411	Zm00001d034217	Concanavalin A-like lectin protein kinase family protein	Concanavalin A-like lectin protein kinase family protein	receptor lectin kinase
249	OG0000021	Gh_A09G1440	Zm00001d053322	Zm00001d034217	Concanavalin A-like lectin protein kinase family protein	Concanavalin A-like lectin protein kinase family protein	receptor lectin kinase
250	OG0000021	Gh_A09G1440	Zm00001d045838	Zm00001d034217	Concanavalin A-like lectin protein kinase family protein	Concanavalin A-like lectin protein kinase family protein	receptor lectin kinase
251	OG0000021	Gh_A09G1440	Zm00001d037397	Zm00001d034217	Concanavalin A-like lectin protein kinase family protein	Concanavalin A-like lectin protein kinase family protein	receptor lectin kinase
252	OG0000021	Gh_A09G1440	Zm00001d019334	Zm00001d034217	Concanavalin A-like lectin protein kinase family protein	receptor lectin kinase	receptor lectin kinase
253	OG0000021	Gh_A09G1440	Zm00001d034217	Zm00001d032869	Concanavalin A-like lectin protein kinase family protein	receptor lectin kinase	receptor lectin kinase
254	OG0000021	Gh_A09G1440	Zm00001d034217	Zm00001d025920	Concanavalin A-like lectin protein kinase family protein	receptor lectin kinase	receptor lectin kinase
255	OG0000021	Gh_A09G1440	Zm00001d034217	Zm00001d028454	Concanavalin A-like lectin protein kinase family protein	receptor lectin kinase	receptor lectin kinase
256	OG0000021	Gh_A09G1440	Zm00001d034217	Zm00001d032868	Concanavalin A-like lectin protein kinase family protein	receptor lectin kinase	receptor lectin kinase
257	OG0000021	Gh_A09G1440	Zm00001d034217	Zm00001d032870	Concanavalin A-like lectin protein kinase family protein	receptor lectin kinase	receptor lectin kinase
258	OG0000021	Gh_A09G1440	Zm00001d034217	Zm00001d034217	Concanavalin A-like lectin protein kinase family protein	receptor lectin kinase	receptor lectin kinase
259	OG0000021	Gh_A09G1440	Zm00001d034217	Zm00001d021896	Concanavalin A-like lectin protein kinase family protein	receptor lectin kinase	receptor lectin kinase
260	OG0000021	Gh_A09G1440	Zm00001d034217	Zm00001d021897	Concanavalin A-like lectin protein kinase family protein	receptor lectin kinase	Concanavalin A-like lectin protein kinase family protein
261	OG0000021	Gh_A10G1990	Zm00001d030759	NA	Concanavalin A-like lectin protein kinase family protein	Concanavalin A-like lectin protein kinase family protein	N/A
262	OG0000021	Gh_A11G2654	Zm00001d034217	NA	Concanavalin A-like lectin protein kinase family protein	receptor lectin kinase	N/A
263	OG0000021	Gh_D01G2163	Zm00001d030759	Zm00001d030759	Concanavalin A-like lectin protein kinase family protein	Concanavalin A-like lectin protein kinase family protein	Concanavalin A-like lectin protein kinase family protein
264	OG0000021	Gh_D01G2164	Zm00001d030759	Zm00001d030759	Concanavalin A-like lectin protein kinase family protein	Concanavalin A-like lectin protein kinase family protein	Concanavalin A-like lectin protein kinase family protein
265	OG0000021	Gh_D02G0279	Zm00001d034217	NA	receptor lectin kinase	receptor lectin kinase	N/A
266	OG0000021	Gh_D04G1185	Zm00001d025921	Zm00001d034217	receptor lectin kinase	receptor lectin kinase	receptor lectin kinase
267	OG0000021	Gh_D04G1185	Zm00001d021896	Zm00001d034217	receptor lectin kinase	receptor lectin kinase	receptor lectin kinase
268	OG0000021	Gh_D04G1185	Zm00001d028455	Zm00001d034217	receptor lectin kinase	Concanavalin A-like lectin protein kinase family protein	receptor lectin kinase
269	OG0000021	Gh_D04G1185	Zm00001d021897	Zm00001d034217	receptor lectin kinase	Concanavalin A-like lectin protein kinase family protein	receptor lectin kinase
270	OG0000021	Gh_D04G1185	Zm00001d025920	Zm00001d034217	receptor lectin kinase	receptor lectin kinase	receptor lectin kinase
271	OG0000021	Gh_D04G1185	Zm00001d028454	Zm00001d034217	receptor lectin kinase	receptor lectin kinase	receptor lectin kinase
272	OG0000021	Gh_D04G1185	Zm00001d032870	Zm00001d034217	receptor lectin kinase	receptor lectin kinase	receptor lectin kinase
273	OG0000021	Gh_D04G1185	Zm00001d032868	Zm00001d034217	receptor lectin kinase	receptor lectin kinase	receptor lectin kinase
274	OG0000021	Gh_D04G1185	Zm00001d032869	Zm00001d034217	receptor lectin kinase	receptor lectin kinase	receptor lectin kinase
275	OG0000021	Gh_D04G1185	Zm00001d019333	Zm00001d034217	receptor lectin kinase	receptor lectin kinase	receptor lectin kinase
276	OG0000021	Gh_D04G1185	Zm00001d016009	Zm00001d034217	receptor lectin kinase	receptor lectin kinase	receptor lectin kinase
277	OG0000021	Gh_D04G1185	Zm00001d019413	Zm00001d034217	receptor lectin kinase	receptor lectin kinase	receptor lectin kinase
278	OG0000021	Gh_D04G1185	Zm00001d045839	Zm00001d034217	receptor lectin kinase	Concanavalin A-like lectin protein kinase family protein	receptor lectin kinase
279	OG0000021	Gh_D04G1185	Zm00001d007843	Zm00001d034217	receptor lectin kinase	Concanavalin A-like lectin protein kinase family protein	receptor lectin kinase
280	OG0000021	Gh_D04G1185	Zm00001d037398	Zm00001d034217	receptor lectin kinase	receptor lectin kinase	receptor lectin kinase
281	OG0000021	Gh_D04G1185	Zm00001d019411	Zm00001d034217	receptor lectin kinase	Concanavalin A-like lectin protein kinase family protein	receptor lectin kinase
282	OG0000021	Gh_D04G1185	Zm00001d053322	Zm00001d034217	receptor lectin kinase	Concanavalin A-like lectin protein kinase family protein	receptor lectin kinase
283	OG0000021	Gh_D04G1185	Zm00001d045838	Zm00001d034217	receptor lectin kinase	Concanavalin A-like lectin protein kinase family protein	receptor lectin kinase
284	OG0000021	Gh_D04G1185	Zm00001d037397	Zm00001d034217	receptor lectin kinase	Concanavalin A-like lectin protein kinase family protein	receptor lectin kinase
285	OG0000021	Gh_D04G1185	Zm00001d019334	Zm00001d034217	receptor lectin kinase	receptor lectin kinase	receptor lectin kinase
286	OG0000021	Gh_D04G1185	Zm00001d034217	Zm00001d028454	receptor lectin kinase	receptor lectin kinase	receptor lectin kinase
287	OG0000021	Gh_D04G1185	Zm00001d034217	Zm00001d025920	receptor lectin kinase	receptor lectin kinase	receptor lectin kinase
288	OG0000021	Gh_D04G1185	Zm00001d034217	Zm00001d032868	receptor lectin kinase	receptor lectin kinase	receptor lectin kinase
289	OG0000021	Gh_D04G1185	Zm00001d034217	Zm00001d032869	receptor lectin kinase	receptor lectin kinase	receptor lectin kinase
290	OG0000021	Gh_D04G1185	Zm00001d034217	Zm00001d032870	receptor lectin kinase	receptor lectin kinase	receptor lectin kinase
291	OG0000021	Gh_D04G1185	Zm00001d034217	Zm00001d034217	receptor lectin kinase	receptor lectin kinase	receptor lectin kinase
292	OG0000021	Gh_D04G1185	Zm00001d034217	Zm00001d021896	receptor lectin kinase	receptor lectin kinase	receptor lectin kinase
293	OG0000021	Gh_D04G1185	Zm00001d034217	Zm00001d021897	receptor lectin kinase	receptor lectin kinase	Concanavalin A-like lectin protein kinase family protein
294	OG0000021	Gh_D04G1187	Zm00001d030759	Zm00001d030759	Concanavalin A-like lectin protein kinase family protein	Concanavalin A-like lectin protein kinase family protein	Concanavalin A-like lectin protein kinase family protein
295	OG0000021	Gh_D04G1285	Zm00001d025921	Zm00001d034217	Concanavalin A-like lectin protein kinase family protein	receptor lectin kinase	receptor lectin kinase
296	OG0000021	Gh_D04G1285	Zm00001d021896	Zm00001d034217	Concanavalin A-like lectin protein kinase family protein	receptor lectin kinase	receptor lectin kinase
297	OG0000021	Gh_D04G1285	Zm00001d028455	Zm00001d034217	Concanavalin A-like lectin protein kinase family protein	Concanavalin A-like lectin protein kinase family protein	receptor lectin kinase
298	OG0000021	Gh_D04G1285	Zm00001d021897	Zm00001d034217	Concanavalin A-like lectin protein kinase family protein	Concanavalin A-like lectin protein kinase family protein	receptor lectin kinase
299	OG0000021	Gh_D04G1285	Zm00001d025920	Zm00001d034217	Concanavalin A-like lectin protein kinase family protein	receptor lectin kinase	receptor lectin kinase
300	OG0000021	Gh_D04G1285	Zm00001d028454	Zm00001d034217	Concanavalin A-like lectin protein kinase family protein	receptor lectin kinase	receptor lectin kinase
301	OG0000021	Gh_D04G1285	Zm00001d032870	Zm00001d034217	Concanavalin A-like lectin protein kinase family protein	receptor lectin kinase	receptor lectin kinase
302	OG0000021	Gh_D04G1285	Zm00001d032868	Zm00001d034217	Concanavalin A-like lectin protein kinase family protein	receptor lectin kinase	receptor lectin kinase
303	OG0000021	Gh_D04G1285	Zm00001d032869	Zm00001d034217	Concanavalin A-like lectin protein kinase family protein	receptor lectin kinase	receptor lectin kinase
304	OG0000021	Gh_D04G1285	Zm00001d019333	Zm00001d034217	Concanavalin A-like lectin protein kinase family protein	receptor lectin kinase	receptor lectin kinase
305	OG0000021	Gh_D04G1285	Zm00001d016009	Zm00001d034217	Concanavalin A-like lectin protein kinase family protein	receptor lectin kinase	receptor lectin kinase
306	OG0000021	Gh_D04G1285	Zm00001d019413	Zm00001d034217	Concanavalin A-like lectin protein kinase family protein	receptor lectin kinase	receptor lectin kinase
307	OG0000021	Gh_D04G1285	Zm00001d045839	Zm00001d034217	Concanavalin A-like lectin protein kinase family protein	Concanavalin A-like lectin protein kinase family protein	receptor lectin kinase
308	OG0000021	Gh_D04G1285	Zm00001d007843	Zm00001d034217	Concanavalin A-like lectin protein kinase family protein	Concanavalin A-like lectin protein kinase family protein	receptor lectin kinase
309	OG0000021	Gh_D04G1285	Zm00001d037398	Zm00001d034217	Concanavalin A-like lectin protein kinase family protein	receptor lectin kinase	receptor lectin kinase
310	OG0000021	Gh_D04G1285	Zm00001d019411	Zm00001d034217	Concanavalin A-like lectin protein kinase family protein	Concanavalin A-like lectin protein kinase family protein	receptor lectin kinase
311	OG0000021	Gh_D04G1285	Zm00001d053322	Zm00001d034217	Concanavalin A-like lectin protein kinase family protein	Concanavalin A-like lectin protein kinase family protein	receptor lectin kinase
312	OG0000021	Gh_D04G1285	Zm00001d045838	Zm00001d034217	Concanavalin A-like lectin protein kinase family protein	Concanavalin A-like lectin protein kinase family protein	receptor lectin kinase
313	OG0000021	Gh_D04G1285	Zm00001d037397	Zm00001d034217	Concanavalin A-like lectin protein kinase family protein	Concanavalin A-like lectin protein kinase family protein	receptor lectin kinase
314	OG0000021	Gh_D04G1285	Zm00001d019334	Zm00001d034217	Concanavalin A-like lectin protein kinase family protein	receptor lectin kinase	receptor lectin kinase
315	OG0000021	Gh_D04G1285	Zm00001d034217	Zm00001d025920	Concanavalin A-like lectin protein kinase family protein	receptor lectin kinase	receptor lectin kinase
316	OG0000021	Gh_D04G1285	Zm00001d034217	Zm00001d028454	Concanavalin A-like lectin protein kinase family protein	receptor lectin kinase	receptor lectin kinase
317	OG0000021	Gh_D04G1285	Zm00001d034217	Zm00001d032868	Concanavalin A-like lectin protein kinase family protein	receptor lectin kinase	receptor lectin kinase
318	OG0000021	Gh_D04G1285	Zm00001d034217	Zm00001d032869	Concanavalin A-like lectin protein kinase family protein	receptor lectin kinase	receptor lectin kinase
319	OG0000021	Gh_D04G1285	Zm00001d034217	Zm00001d032870	Concanavalin A-like lectin protein kinase family protein	receptor lectin kinase	receptor lectin kinase
320	OG0000021	Gh_D04G1285	Zm00001d034217	Zm00001d034217	Concanavalin A-like lectin protein kinase family protein	receptor lectin kinase	receptor lectin kinase
321	OG0000021	Gh_D04G1285	Zm00001d034217	Zm00001d021896	Concanavalin A-like lectin protein kinase family protein	receptor lectin kinase	receptor lectin kinase
322	OG0000021	Gh_D04G1285	Zm00001d034217	Zm00001d021897	Concanavalin A-like lectin protein kinase family protein	receptor lectin kinase	Concanavalin A-like lectin protein kinase family protein
323	OG0000021	Gh_D05G2898	Zm00001d030759	NA	Concanavalin A-like lectin protein kinase family protein	Concanavalin A-like lectin protein kinase family protein	N/A
324	OG0000021	Gh_D07G0434	Zm00001d025921	Zm00001d034217	Concanavalin A-like lectin protein kinase family protein	receptor lectin kinase	receptor lectin kinase
325	OG0000021	Gh_D07G0434	Zm00001d021896	Zm00001d034217	Concanavalin A-like lectin protein kinase family protein	receptor lectin kinase	receptor lectin kinase
326	OG0000021	Gh_D07G0434	Zm00001d028455	Zm00001d034217	Concanavalin A-like lectin protein kinase family protein	Concanavalin A-like lectin protein kinase family protein	receptor lectin kinase
327	OG0000021	Gh_D07G0434	Zm00001d021897	Zm00001d034217	Concanavalin A-like lectin protein kinase family protein	Concanavalin A-like lectin protein kinase family protein	receptor lectin kinase
328	OG0000021	Gh_D07G0434	Zm00001d025920	Zm00001d034217	Concanavalin A-like lectin protein kinase family protein	receptor lectin kinase	receptor lectin kinase
329	OG0000021	Gh_D07G0434	Zm00001d028454	Zm00001d034217	Concanavalin A-like lectin protein kinase family protein	receptor lectin kinase	receptor lectin kinase
330	OG0000021	Gh_D07G0434	Zm00001d032870	Zm00001d034217	Concanavalin A-like lectin protein kinase family protein	receptor lectin kinase	receptor lectin kinase
331	OG0000021	Gh_D07G0434	Zm00001d032868	Zm00001d034217	Concanavalin A-like lectin protein kinase family protein	receptor lectin kinase	receptor lectin kinase
332	OG0000021	Gh_D07G0434	Zm00001d032869	Zm00001d034217	Concanavalin A-like lectin protein kinase family protein	receptor lectin kinase	receptor lectin kinase
333	OG0000021	Gh_D07G0434	Zm00001d019333	Zm00001d034217	Concanavalin A-like lectin protein kinase family protein	receptor lectin kinase	receptor lectin kinase
334	OG0000021	Gh_D07G0434	Zm00001d016009	Zm00001d034217	Concanavalin A-like lectin protein kinase family protein	receptor lectin kinase	receptor lectin kinase
335	OG0000021	Gh_D07G0434	Zm00001d019413	Zm00001d034217	Concanavalin A-like lectin protein kinase family protein	receptor lectin kinase	receptor lectin kinase
336	OG0000021	Gh_D07G0434	Zm00001d045839	Zm00001d034217	Concanavalin A-like lectin protein kinase family protein	Concanavalin A-like lectin protein kinase family protein	receptor lectin kinase
337	OG0000021	Gh_D07G0434	Zm00001d007843	Zm00001d034217	Concanavalin A-like lectin protein kinase family protein	Concanavalin A-like lectin protein kinase family protein	receptor lectin kinase
338	OG0000021	Gh_D07G0434	Zm00001d037398	Zm00001d034217	Concanavalin A-like lectin protein kinase family protein	receptor lectin kinase	receptor lectin kinase
339	OG0000021	Gh_D07G0434	Zm00001d019411	Zm00001d034217	Concanavalin A-like lectin protein kinase family protein	Concanavalin A-like lectin protein kinase family protein	receptor lectin kinase
340	OG0000021	Gh_D07G0434	Zm00001d053322	Zm00001d034217	Concanavalin A-like lectin protein kinase family protein	Concanavalin A-like lectin protein kinase family protein	receptor lectin kinase
341	OG0000021	Gh_D07G0434	Zm00001d045838	Zm00001d034217	Concanavalin A-like lectin protein kinase family protein	Concanavalin A-like lectin protein kinase family protein	receptor lectin kinase
342	OG0000021	Gh_D07G0434	Zm00001d037397	Zm00001d034217	Concanavalin A-like lectin protein kinase family protein	Concanavalin A-like lectin protein kinase family protein	receptor lectin kinase
343	OG0000021	Gh_D07G0434	Zm00001d019334	Zm00001d034217	Concanavalin A-like lectin protein kinase family protein	receptor lectin kinase	receptor lectin kinase
344	OG0000021	Gh_D07G0434	Zm00001d034217	Zm00001d025920	Concanavalin A-like lectin protein kinase family protein	receptor lectin kinase	receptor lectin kinase
345	OG0000021	Gh_D07G0434	Zm00001d034217	Zm00001d028454	Concanavalin A-like lectin protein kinase family protein	receptor lectin kinase	receptor lectin kinase
346	OG0000021	Gh_D07G0434	Zm00001d034217	Zm00001d032868	Concanavalin A-like lectin protein kinase family protein	receptor lectin kinase	receptor lectin kinase
347	OG0000021	Gh_D07G0434	Zm00001d034217	Zm00001d032869	Concanavalin A-like lectin protein kinase family protein	receptor lectin kinase	receptor lectin kinase
348	OG0000021	Gh_D07G0434	Zm00001d034217	Zm00001d032870	Concanavalin A-like lectin protein kinase family protein	receptor lectin kinase	receptor lectin kinase
349	OG0000021	Gh_D07G0434	Zm00001d034217	Zm00001d034217	Concanavalin A-like lectin protein kinase family protein	receptor lectin kinase	receptor lectin kinase
350	OG0000021	Gh_D07G0434	Zm00001d034217	Zm00001d021896	Concanavalin A-like lectin protein kinase family protein	receptor lectin kinase	receptor lectin kinase
351	OG0000021	Gh_D07G0434	Zm00001d034217	Zm00001d021897	Concanavalin A-like lectin protein kinase family protein	receptor lectin kinase	Concanavalin A-like lectin protein kinase family protein
352	OG0000021	Gh_D09G1449	Zm00001d025921	Zm00001d034217	receptor lectin kinase	receptor lectin kinase	receptor lectin kinase
353	OG0000021	Gh_D09G1449	Zm00001d021896	Zm00001d034217	receptor lectin kinase	receptor lectin kinase	receptor lectin kinase
354	OG0000021	Gh_D09G1449	Zm00001d028455	Zm00001d034217	receptor lectin kinase	Concanavalin A-like lectin protein kinase family protein	receptor lectin kinase
355	OG0000021	Gh_D09G1449	Zm00001d021897	Zm00001d034217	receptor lectin kinase	Concanavalin A-like lectin protein kinase family protein	receptor lectin kinase
356	OG0000021	Gh_D09G1449	Zm00001d025920	Zm00001d034217	receptor lectin kinase	receptor lectin kinase	receptor lectin kinase
357	OG0000021	Gh_D09G1449	Zm00001d028454	Zm00001d034217	receptor lectin kinase	receptor lectin kinase	receptor lectin kinase
358	OG0000021	Gh_D09G1449	Zm00001d032870	Zm00001d034217	receptor lectin kinase	receptor lectin kinase	receptor lectin kinase
359	OG0000021	Gh_D09G1449	Zm00001d032868	Zm00001d034217	receptor lectin kinase	receptor lectin kinase	receptor lectin kinase
360	OG0000021	Gh_D09G1449	Zm00001d032869	Zm00001d034217	receptor lectin kinase	receptor lectin kinase	receptor lectin kinase
361	OG0000021	Gh_D09G1449	Zm00001d019333	Zm00001d034217	receptor lectin kinase	receptor lectin kinase	receptor lectin kinase
362	OG0000021	Gh_D09G1449	Zm00001d016009	Zm00001d034217	receptor lectin kinase	receptor lectin kinase	receptor lectin kinase
363	OG0000021	Gh_D09G1449	Zm00001d019413	Zm00001d034217	receptor lectin kinase	receptor lectin kinase	receptor lectin kinase
364	OG0000021	Gh_D09G1449	Zm00001d045839	Zm00001d034217	receptor lectin kinase	Concanavalin A-like lectin protein kinase family protein	receptor lectin kinase
365	OG0000021	Gh_D09G1449	Zm00001d007843	Zm00001d034217	receptor lectin kinase	Concanavalin A-like lectin protein kinase family protein	receptor lectin kinase
366	OG0000021	Gh_D09G1449	Zm00001d037398	Zm00001d034217	receptor lectin kinase	receptor lectin kinase	receptor lectin kinase
367	OG0000021	Gh_D09G1449	Zm00001d019411	Zm00001d034217	receptor lectin kinase	Concanavalin A-like lectin protein kinase family protein	receptor lectin kinase
368	OG0000021	Gh_D09G1449	Zm00001d053322	Zm00001d034217	receptor lectin kinase	Concanavalin A-like lectin protein kinase family protein	receptor lectin kinase
369	OG0000021	Gh_D09G1449	Zm00001d045838	Zm00001d034217	receptor lectin kinase	Concanavalin A-like lectin protein kinase family protein	receptor lectin kinase
370	OG0000021	Gh_D09G1449	Zm00001d037397	Zm00001d034217	receptor lectin kinase	Concanavalin A-like lectin protein kinase family protein	receptor lectin kinase
371	OG0000021	Gh_D09G1449	Zm00001d019334	Zm00001d034217	receptor lectin kinase	receptor lectin kinase	receptor lectin kinase
372	OG0000021	Gh_D09G1449	Zm00001d034217	Zm00001d025920	receptor lectin kinase	receptor lectin kinase	receptor lectin kinase
373	OG0000021	Gh_D09G1449	Zm00001d034217	Zm00001d028454	receptor lectin kinase	receptor lectin kinase	receptor lectin kinase
374	OG0000021	Gh_D09G1449	Zm00001d034217	Zm00001d032868	receptor lectin kinase	receptor lectin kinase	receptor lectin kinase
375	OG0000021	Gh_D09G1449	Zm00001d034217	Zm00001d032869	receptor lectin kinase	receptor lectin kinase	receptor lectin kinase
376	OG0000021	Gh_D09G1449	Zm00001d034217	Zm00001d032870	receptor lectin kinase	receptor lectin kinase	receptor lectin kinase
377	OG0000021	Gh_D09G1449	Zm00001d034217	Zm00001d034217	receptor lectin kinase	receptor lectin kinase	receptor lectin kinase
378	OG0000021	Gh_D09G1449	Zm00001d034217	Zm00001d021896	receptor lectin kinase	receptor lectin kinase	receptor lectin kinase
379	OG0000021	Gh_D09G1449	Zm00001d034217	Zm00001d021897	receptor lectin kinase	receptor lectin kinase	Concanavalin A-like lectin protein kinase family protein
380	OG0000021	Gh_D10G2298	Zm00001d030759	NA	Concanavalin A-like lectin protein kinase family protein	Concanavalin A-like lectin protein kinase family protein	N/A
381	OG0000021	Gh_D11G3041	Zm00001d034217	NA	Concanavalin A-like lectin protein kinase family protein	receptor lectin kinase	N/A
382	OG0000021	Gh_D11G3043	Zm00001d034217	NA	Concanavalin A-like lectin protein kinase family protein	receptor lectin kinase	N/A
383	OG0000021	Gh_D11G3308	Zm00001d030759	NA	Concanavalin A-like lectin protein kinase family protein	Concanavalin A-like lectin protein kinase family protein	N/A
384	OG0000021	Gh_Sca005159G01	Zm00001d025921	Zm00001d034217	Concanavalin A-like lectin protein kinase family protein	receptor lectin kinase	receptor lectin kinase
385	OG0000021	Gh_Sca005159G01	Zm00001d021896	Zm00001d034217	Concanavalin A-like lectin protein kinase family protein	receptor lectin kinase	receptor lectin kinase
386	OG0000021	Gh_Sca005159G01	Zm00001d028455	Zm00001d034217	Concanavalin A-like lectin protein kinase family protein	Concanavalin A-like lectin protein kinase family protein	receptor lectin kinase
387	OG0000021	Gh_Sca005159G01	Zm00001d021897	Zm00001d034217	Concanavalin A-like lectin protein kinase family protein	Concanavalin A-like lectin protein kinase family protein	receptor lectin kinase
388	OG0000021	Gh_Sca005159G01	Zm00001d025920	Zm00001d034217	Concanavalin A-like lectin protein kinase family protein	receptor lectin kinase	receptor lectin kinase
389	OG0000021	Gh_Sca005159G01	Zm00001d028454	Zm00001d034217	Concanavalin A-like lectin protein kinase family protein	receptor lectin kinase	receptor lectin kinase
390	OG0000021	Gh_Sca005159G01	Zm00001d032870	Zm00001d034217	Concanavalin A-like lectin protein kinase family protein	receptor lectin kinase	receptor lectin kinase
391	OG0000021	Gh_Sca005159G01	Zm00001d032868	Zm00001d034217	Concanavalin A-like lectin protein kinase family protein	receptor lectin kinase	receptor lectin kinase
392	OG0000021	Gh_Sca005159G01	Zm00001d032869	Zm00001d034217	Concanavalin A-like lectin protein kinase family protein	receptor lectin kinase	receptor lectin kinase
393	OG0000021	Gh_Sca005159G01	Zm00001d019333	Zm00001d034217	Concanavalin A-like lectin protein kinase family protein	receptor lectin kinase	receptor lectin kinase
394	OG0000021	Gh_Sca005159G01	Zm00001d016009	Zm00001d034217	Concanavalin A-like lectin protein kinase family protein	receptor lectin kinase	receptor lectin kinase
395	OG0000021	Gh_Sca005159G01	Zm00001d019413	Zm00001d034217	Concanavalin A-like lectin protein kinase family protein	receptor lectin kinase	receptor lectin kinase
396	OG0000021	Gh_Sca005159G01	Zm00001d045839	Zm00001d034217	Concanavalin A-like lectin protein kinase family protein	Concanavalin A-like lectin protein kinase family protein	receptor lectin kinase
397	OG0000021	Gh_Sca005159G01	Zm00001d007843	Zm00001d034217	Concanavalin A-like lectin protein kinase family protein	Concanavalin A-like lectin protein kinase family protein	receptor lectin kinase
398	OG0000021	Gh_Sca005159G01	Zm00001d037398	Zm00001d034217	Concanavalin A-like lectin protein kinase family protein	receptor lectin kinase	receptor lectin kinase
399	OG0000021	Gh_Sca005159G01	Zm00001d019411	Zm00001d034217	Concanavalin A-like lectin protein kinase family protein	Concanavalin A-like lectin protein kinase family protein	receptor lectin kinase
400	OG0000021	Gh_Sca005159G01	Zm00001d053322	Zm00001d034217	Concanavalin A-like lectin protein kinase family protein	Concanavalin A-like lectin protein kinase family protein	receptor lectin kinase
401	OG0000021	Gh_Sca005159G01	Zm00001d045838	Zm00001d034217	Concanavalin A-like lectin protein kinase family protein	Concanavalin A-like lectin protein kinase family protein	receptor lectin kinase
402	OG0000021	Gh_Sca005159G01	Zm00001d037397	Zm00001d034217	Concanavalin A-like lectin protein kinase family protein	Concanavalin A-like lectin protein kinase family protein	receptor lectin kinase
403	OG0000021	Gh_Sca005159G01	Zm00001d019334	Zm00001d034217	Concanavalin A-like lectin protein kinase family protein	receptor lectin kinase	receptor lectin kinase
404	OG0000021	Gh_Sca005159G01	Zm00001d034217	Zm00001d025920	Concanavalin A-like lectin protein kinase family protein	receptor lectin kinase	receptor lectin kinase
405	OG0000021	Gh_Sca005159G01	Zm00001d034217	Zm00001d028454	Concanavalin A-like lectin protein kinase family protein	receptor lectin kinase	receptor lectin kinase
406	OG0000021	Gh_Sca005159G01	Zm00001d034217	Zm00001d032868	Concanavalin A-like lectin protein kinase family protein	receptor lectin kinase	receptor lectin kinase
407	OG0000021	Gh_Sca005159G01	Zm00001d034217	Zm00001d032869	Concanavalin A-like lectin protein kinase family protein	receptor lectin kinase	receptor lectin kinase
408	OG0000021	Gh_Sca005159G01	Zm00001d034217	Zm00001d032870	Concanavalin A-like lectin protein kinase family protein	receptor lectin kinase	receptor lectin kinase
409	OG0000021	Gh_Sca005159G01	Zm00001d034217	Zm00001d034217	Concanavalin A-like lectin protein kinase family protein	receptor lectin kinase	receptor lectin kinase
410	OG0000021	Gh_Sca005159G01	Zm00001d034217	Zm00001d021896	Concanavalin A-like lectin protein kinase family protein	receptor lectin kinase	receptor lectin kinase
411	OG0000021	Gh_Sca005159G01	Zm00001d034217	Zm00001d021897	Concanavalin A-like lectin protein kinase family protein	receptor lectin kinase	Concanavalin A-like lectin protein kinase family protein
412	OG0000022	Gh_D11G2949	Zm00001d045512	NA	LRR and NB-ARC domains-containing disease resistance protein	Disease resistance protein (CC-NBS-LRR class) family	N/A
413	OG0000023	Gh_A03G0199	Zm00001d052335	NA	Peroxidase superfamily protein	Peroxidase superfamily protein	N/A
414	OG0000023	Gh_A08G1806	Zm00001d022458	Zm00001d002042	Peroxidase superfamily protein	Peroxidase superfamily protein	Peroxidase superfamily protein
415	OG0000023	Gh_A08G1806	Zm00001d022457	Zm00001d002042	Peroxidase superfamily protein	Peroxidase superfamily protein	Peroxidase superfamily protein
416	OG0000023	Gh_A08G1806	Zm00001d022456	Zm00001d002042	Peroxidase superfamily protein	Peroxidase superfamily protein	Peroxidase superfamily protein
417	OG0000023	Gh_A08G1806	Zm00001d007160	Zm00001d002042	Peroxidase superfamily protein	Peroxidase superfamily protein	Peroxidase superfamily protein
418	OG0000023	Gh_A08G1806	Zm00001d029604	Zm00001d002042	Peroxidase superfamily protein	Peroxidase superfamily protein	Peroxidase superfamily protein
419	OG0000023	Gh_A10G1317	Zm00001d022458	NA	Peroxidase superfamily protein	Peroxidase superfamily protein	N/A
420	OG0000023	Gh_A10G1317	Zm00001d022457	NA	Peroxidase superfamily protein	Peroxidase superfamily protein	N/A
421	OG0000023	Gh_A10G1317	Zm00001d022456	NA	Peroxidase superfamily protein	Peroxidase superfamily protein	N/A
422	OG0000023	Gh_A10G1317	Zm00001d007160	NA	Peroxidase superfamily protein	Peroxidase superfamily protein	N/A
423	OG0000023	Gh_A10G1317	Zm00001d029604	NA	Peroxidase superfamily protein	Peroxidase superfamily protein	N/A
424	OG0000023	Gh_D03G1381	Zm00001d036835	Zm00001d052335	Peroxidase superfamily protein	Peroxidase superfamily protein	Peroxidase superfamily protein
425	OG0000023	Gh_D03G1381	Zm00001d052336	Zm00001d052335	Peroxidase superfamily protein	Peroxidase superfamily protein	Peroxidase superfamily protein
426	OG0000023	Gh_D03G1381	Zm00001d052335	Zm00001d036835	Peroxidase superfamily protein	Peroxidase superfamily protein	Peroxidase superfamily protein
427	OG0000023	Gh_D03G1381	Zm00001d052335	Zm00001d052335	Peroxidase superfamily protein	Peroxidase superfamily protein	Peroxidase superfamily protein
428	OG0000023	Gh_D03G1381	Zm00001d052335	Zm00001d052336	Peroxidase superfamily protein	Peroxidase superfamily protein	Peroxidase superfamily protein
429	OG0000023	Gh_D03G1382	Zm00001d036835	Zm00001d052335	Peroxidase superfamily protein	Peroxidase superfamily protein	Peroxidase superfamily protein
430	OG0000023	Gh_D03G1382	Zm00001d052336	Zm00001d052335	Peroxidase superfamily protein	Peroxidase superfamily protein	Peroxidase superfamily protein
431	OG0000023	Gh_D03G1382	Zm00001d052335	Zm00001d052335	Peroxidase superfamily protein	Peroxidase superfamily protein	Peroxidase superfamily protein
432	OG0000023	Gh_D03G1382	Zm00001d052335	Zm00001d052336	Peroxidase superfamily protein	Peroxidase superfamily protein	Peroxidase superfamily protein
433	OG0000023	Gh_D03G1382	Zm00001d052335	Zm00001d036835	Peroxidase superfamily protein	Peroxidase superfamily protein	Peroxidase superfamily protein
434	OG0000023	Gh_D05G3256	Zm00001d016185	NA	Peroxidase superfamily protein	Peroxidase superfamily protein	N/A
435	OG0000023	Gh_D05G3256	Zm00001d046186	NA	Peroxidase superfamily protein	Peroxidase superfamily protein	N/A
436	OG0000023	Gh_D08G2167	Zm00001d022458	Zm00001d002042	Peroxidase superfamily protein	Peroxidase superfamily protein	Peroxidase superfamily protein
437	OG0000023	Gh_D08G2167	Zm00001d022457	Zm00001d002042	Peroxidase superfamily protein	Peroxidase superfamily protein	Peroxidase superfamily protein
438	OG0000023	Gh_D08G2167	Zm00001d022456	Zm00001d002042	Peroxidase superfamily protein	Peroxidase superfamily protein	Peroxidase superfamily protein
439	OG0000023	Gh_D08G2167	Zm00001d007160	Zm00001d002042	Peroxidase superfamily protein	Peroxidase superfamily protein	Peroxidase superfamily protein
440	OG0000023	Gh_D08G2167	Zm00001d029604	Zm00001d002042	Peroxidase superfamily protein	Peroxidase superfamily protein	Peroxidase superfamily protein
441	OG0000023	Gh_D10G1158	Zm00001d022458	NA	Peroxidase superfamily protein	Peroxidase superfamily protein	N/A
442	OG0000023	Gh_D10G1158	Zm00001d022457	NA	Peroxidase superfamily protein	Peroxidase superfamily protein	N/A
443	OG0000023	Gh_D10G1158	Zm00001d022456	NA	Peroxidase superfamily protein	Peroxidase superfamily protein	N/A
444	OG0000023	Gh_D10G1158	Zm00001d007160	NA	Peroxidase superfamily protein	Peroxidase superfamily protein	N/A
445	OG0000023	Gh_D10G1158	Zm00001d029604	NA	Peroxidase superfamily protein	Peroxidase superfamily protein	N/A
446	OG0000024	Gh_A05G0230	Zm00001d003048	NA	NB-ARC domain-containing disease resistance protein	NB-ARC domain-containing disease resistance protein	N/A
447	OG0000024	Gh_D05G0314	Zm00001d003048	Zm00001d043233	NB-ARC domain-containing disease resistance protein	NB-ARC domain-containing disease resistance protein	NB-ARC domain-containing disease resistance protein
448	OG0000027	Gh_A03G1391	Zm00001d019613	NA	O-methyltransferase family protein	O-methyltransferase family protein	N/A
449	OG0000027	Gh_A03G1391	Zm00001d024120	NA	O-methyltransferase family protein	O-methyltransferase family protein	N/A
450	OG0000027	Gh_A03G1391	Zm00001d032083	NA	O-methyltransferase family protein	O-methyltransferase family protein	N/A
451	OG0000027	Gh_A03G1391	Zm00001d023257	NA	O-methyltransferase family protein	O-methyltransferase family protein	N/A
452	OG0000027	Gh_A03G1391	Zm00001d023254	NA	O-methyltransferase family protein	O-methyltransferase family protein	N/A
453	OG0000027	Gh_A03G1391	Zm00001d049020	NA	O-methyltransferase family protein	O-methyltransferase family protein	N/A
454	OG0000027	Gh_A03G1391	Zm00001d010736	NA	O-methyltransferase family protein	O-methyltransferase family protein	N/A
455	OG0000027	Gh_A03G1391	Zm00001d053156	NA	O-methyltransferase family protein	O-methyltransferase family protein	N/A
456	OG0000027	Gh_A03G1391	Zm00001d038699	NA	O-methyltransferase family protein	O-methyltransferase family protein	N/A
457	OG0000027	Gh_A03G1391	Zm00001d038702	NA	O-methyltransferase family protein	O-methyltransferase family protein	N/A
458	OG0000027	Gh_A03G1391	Zm00001d038703	NA	O-methyltransferase family protein	O-methyltransferase family protein	N/A
459	OG0000027	Gh_A03G1391	Zm00001d049303	NA	O-methyltransferase family protein	O-methyltransferase family protein	N/A
460	OG0000027	Gh_A03G1391	Zm00001d052684	NA	O-methyltransferase family protein	O-methyltransferase family protein	N/A
461	OG0000027	Gh_A03G1391	Zm00001d052683	NA	O-methyltransferase family protein	O-methyltransferase family protein	N/A
462	OG0000027	Gh_A03G1391	Zm00001d038700	NA	O-methyltransferase family protein	O-methyltransferase family protein	N/A
463	OG0000027	Gh_A03G1391	Zm00001d047192	NA	O-methyltransferase family protein	O-methyltransferase family protein	N/A
464	OG0000027	Gh_A03G1391	Zm00001d029359	NA	O-methyltransferase family protein	O-methyltransferase family protein	N/A
465	OG0000027	Gh_A03G1391	Zm00001d029353	NA	O-methyltransferase family protein	O-methyltransferase family protein	N/A
466	OG0000027	Gh_A03G1391	Zm00001d029356	NA	O-methyltransferase family protein	O-methyltransferase family protein	N/A
467	OG0000027	Gh_A03G1391	Zm00001d004921	NA	O-methyltransferase family protein	O-methyltransferase family protein	N/A
468	OG0000027	Gh_A03G1391	Zm00001d047194	NA	O-methyltransferase family protein	O-methyltransferase family protein	N/A
469	OG0000027	Gh_A03G1391	Zm00001d051934	NA	O-methyltransferase family protein	O-methyltransferase family protein	N/A
470	OG0000027	Gh_A03G1391	Zm00001d049265	NA	O-methyltransferase family protein	O-methyltransferase family protein	N/A
471	OG0000027	Gh_A03G1391	Zm00001d049181	NA	O-methyltransferase family protein	O-methyltransferase family protein	N/A
472	OG0000027	Gh_A03G1391	Zm00001d049179	NA	O-methyltransferase family protein	O-methyltransferase family protein	N/A
473	OG0000027	Gh_A03G2147	Zm00001d032083	NA	O-methyltransferase family protein	O-methyltransferase family protein	N/A
474	OG0000027	Gh_A03G2147	Zm00001d010736	NA	O-methyltransferase family protein	O-methyltransferase family protein	N/A
475	OG0000027	Gh_A03G2147	Zm00001d053156	NA	O-methyltransferase family protein	O-methyltransferase family protein	N/A
476	OG0000027	Gh_A03G2147	Zm00001d038700	NA	O-methyltransferase family protein	O-methyltransferase family protein	N/A
477	OG0000027	Gh_A03G2147	Zm00001d029359	NA	O-methyltransferase family protein	O-methyltransferase family protein	N/A
478	OG0000027	Gh_A03G2147	Zm00001d029356	NA	O-methyltransferase family protein	O-methyltransferase family protein	N/A
479	OG0000027	Gh_A03G2147	Zm00001d004921	NA	O-methyltransferase family protein	O-methyltransferase family protein	N/A
480	OG0000027	Gh_A03G2147	Zm00001d049265	NA	O-methyltransferase family protein	O-methyltransferase family protein	N/A
481	OG0000027	Gh_A03G2147	Zm00001d049181	NA	O-methyltransferase family protein	O-methyltransferase family protein	N/A
482	OG0000027	Gh_A03G2148	Zm00001d032083	NA	O-methyltransferase family protein	O-methyltransferase family protein	N/A
483	OG0000027	Gh_A03G2148	Zm00001d010736	NA	O-methyltransferase family protein	O-methyltransferase family protein	N/A
484	OG0000027	Gh_A03G2148	Zm00001d053156	NA	O-methyltransferase family protein	O-methyltransferase family protein	N/A
485	OG0000027	Gh_A03G2148	Zm00001d038700	NA	O-methyltransferase family protein	O-methyltransferase family protein	N/A
486	OG0000027	Gh_A03G2148	Zm00001d029359	NA	O-methyltransferase family protein	O-methyltransferase family protein	N/A
487	OG0000027	Gh_A03G2148	Zm00001d029356	NA	O-methyltransferase family protein	O-methyltransferase family protein	N/A
488	OG0000027	Gh_A03G2148	Zm00001d004921	NA	O-methyltransferase family protein	O-methyltransferase family protein	N/A
489	OG0000027	Gh_A03G2148	Zm00001d049265	NA	O-methyltransferase family protein	O-methyltransferase family protein	N/A
490	OG0000027	Gh_A03G2148	Zm00001d049181	NA	O-methyltransferase family protein	O-methyltransferase family protein	N/A
491	OG0000027	Gh_A04G1460	Zm00001d032083	NA	O-methyltransferase family protein	O-methyltransferase family protein	N/A
492	OG0000027	Gh_A04G1460	Zm00001d010736	NA	O-methyltransferase family protein	O-methyltransferase family protein	N/A
493	OG0000027	Gh_A04G1460	Zm00001d053156	NA	O-methyltransferase family protein	O-methyltransferase family protein	N/A
494	OG0000027	Gh_A04G1460	Zm00001d038700	NA	O-methyltransferase family protein	O-methyltransferase family protein	N/A
495	OG0000027	Gh_A04G1460	Zm00001d029359	NA	O-methyltransferase family protein	O-methyltransferase family protein	N/A
496	OG0000027	Gh_A04G1460	Zm00001d029356	NA	O-methyltransferase family protein	O-methyltransferase family protein	N/A
497	OG0000027	Gh_A04G1460	Zm00001d004921	NA	O-methyltransferase family protein	O-methyltransferase family protein	N/A
498	OG0000027	Gh_A04G1460	Zm00001d049265	NA	O-methyltransferase family protein	O-methyltransferase family protein	N/A
499	OG0000027	Gh_A04G1460	Zm00001d049181	NA	O-methyltransferase family protein	O-methyltransferase family protein	N/A
500	OG0000027	Gh_A04G1461	Zm00001d032083	NA	O-methyltransferase family protein	O-methyltransferase family protein	N/A
501	OG0000027	Gh_A04G1461	Zm00001d010736	NA	O-methyltransferase family protein	O-methyltransferase family protein	N/A
502	OG0000027	Gh_A04G1461	Zm00001d053156	NA	O-methyltransferase family protein	O-methyltransferase family protein	N/A
503	OG0000027	Gh_A04G1461	Zm00001d038700	NA	O-methyltransferase family protein	O-methyltransferase family protein	N/A
504	OG0000027	Gh_A04G1461	Zm00001d029359	NA	O-methyltransferase family protein	O-methyltransferase family protein	N/A
505	OG0000027	Gh_A04G1461	Zm00001d029356	NA	O-methyltransferase family protein	O-methyltransferase family protein	N/A
506	OG0000027	Gh_A04G1461	Zm00001d004921	NA	O-methyltransferase family protein	O-methyltransferase family protein	N/A
507	OG0000027	Gh_A04G1461	Zm00001d049265	NA	O-methyltransferase family protein	O-methyltransferase family protein	N/A
508	OG0000027	Gh_A04G1461	Zm00001d049181	NA	O-methyltransferase family protein	O-methyltransferase family protein	N/A
509	OG0000027	Gh_A04G1462	Zm00001d032083	NA	O-methyltransferase family protein	O-methyltransferase family protein	N/A
510	OG0000027	Gh_A04G1462	Zm00001d010736	NA	O-methyltransferase family protein	O-methyltransferase family protein	N/A
511	OG0000027	Gh_A04G1462	Zm00001d053156	NA	O-methyltransferase family protein	O-methyltransferase family protein	N/A
512	OG0000027	Gh_A04G1462	Zm00001d038700	NA	O-methyltransferase family protein	O-methyltransferase family protein	N/A
513	OG0000027	Gh_A04G1462	Zm00001d029359	NA	O-methyltransferase family protein	O-methyltransferase family protein	N/A
514	OG0000027	Gh_A04G1462	Zm00001d029356	NA	O-methyltransferase family protein	O-methyltransferase family protein	N/A
515	OG0000027	Gh_A04G1462	Zm00001d004921	NA	O-methyltransferase family protein	O-methyltransferase family protein	N/A
516	OG0000027	Gh_A04G1462	Zm00001d049265	NA	O-methyltransferase family protein	O-methyltransferase family protein	N/A
517	OG0000027	Gh_A04G1462	Zm00001d049181	NA	O-methyltransferase family protein	O-methyltransferase family protein	N/A
518	OG0000027	Gh_A04G1463	Zm00001d032083	NA	O-methyltransferase family protein	O-methyltransferase family protein	N/A
519	OG0000027	Gh_A04G1463	Zm00001d010736	NA	O-methyltransferase family protein	O-methyltransferase family protein	N/A
520	OG0000027	Gh_A04G1463	Zm00001d053156	NA	O-methyltransferase family protein	O-methyltransferase family protein	N/A
521	OG0000027	Gh_A04G1463	Zm00001d038700	NA	O-methyltransferase family protein	O-methyltransferase family protein	N/A
522	OG0000027	Gh_A04G1463	Zm00001d029359	NA	O-methyltransferase family protein	O-methyltransferase family protein	N/A
523	OG0000027	Gh_A04G1463	Zm00001d029356	NA	O-methyltransferase family protein	O-methyltransferase family protein	N/A
524	OG0000027	Gh_A04G1463	Zm00001d004921	NA	O-methyltransferase family protein	O-methyltransferase family protein	N/A
525	OG0000027	Gh_A04G1463	Zm00001d049265	NA	O-methyltransferase family protein	O-methyltransferase family protein	N/A
526	OG0000027	Gh_A04G1463	Zm00001d049181	NA	O-methyltransferase family protein	O-methyltransferase family protein	N/A
527	OG0000027	Gh_A11G2625	Zm00001d032083	NA	O-methyltransferase family protein	O-methyltransferase family protein	N/A
528	OG0000027	Gh_A11G2625	Zm00001d010736	NA	O-methyltransferase family protein	O-methyltransferase family protein	N/A
529	OG0000027	Gh_A11G2625	Zm00001d053156	NA	O-methyltransferase family protein	O-methyltransferase family protein	N/A
530	OG0000027	Gh_A11G2625	Zm00001d038700	NA	O-methyltransferase family protein	O-methyltransferase family protein	N/A
531	OG0000027	Gh_A11G2625	Zm00001d029359	NA	O-methyltransferase family protein	O-methyltransferase family protein	N/A
532	OG0000027	Gh_A11G2625	Zm00001d029356	NA	O-methyltransferase family protein	O-methyltransferase family protein	N/A
533	OG0000027	Gh_A11G2625	Zm00001d004921	NA	O-methyltransferase family protein	O-methyltransferase family protein	N/A
534	OG0000027	Gh_A11G2625	Zm00001d049265	NA	O-methyltransferase family protein	O-methyltransferase family protein	N/A
535	OG0000027	Gh_A11G2625	Zm00001d049181	NA	O-methyltransferase family protein	O-methyltransferase family protein	N/A
536	OG0000027	Gh_A12G0326	Zm00001d032083	NA	O-methyltransferase family protein	O-methyltransferase family protein	N/A
537	OG0000027	Gh_A12G0326	Zm00001d010736	NA	O-methyltransferase family protein	O-methyltransferase family protein	N/A
538	OG0000027	Gh_A12G0326	Zm00001d053156	NA	O-methyltransferase family protein	O-methyltransferase family protein	N/A
539	OG0000027	Gh_A12G0326	Zm00001d038700	NA	O-methyltransferase family protein	O-methyltransferase family protein	N/A
540	OG0000027	Gh_A12G0326	Zm00001d029359	NA	O-methyltransferase family protein	O-methyltransferase family protein	N/A
541	OG0000027	Gh_A12G0326	Zm00001d029356	NA	O-methyltransferase family protein	O-methyltransferase family protein	N/A
542	OG0000027	Gh_A12G0326	Zm00001d004921	NA	O-methyltransferase family protein	O-methyltransferase family protein	N/A
543	OG0000027	Gh_A12G0326	Zm00001d049265	NA	O-methyltransferase family protein	O-methyltransferase family protein	N/A
544	OG0000027	Gh_A12G0326	Zm00001d049181	NA	O-methyltransferase family protein	O-methyltransferase family protein	N/A
545	OG0000027	Gh_A12G2531	Zm00001d032083	NA	O-methyltransferase family protein	O-methyltransferase family protein	N/A
546	OG0000027	Gh_A12G2531	Zm00001d010736	NA	O-methyltransferase family protein	O-methyltransferase family protein	N/A
547	OG0000027	Gh_A12G2531	Zm00001d053156	NA	O-methyltransferase family protein	O-methyltransferase family protein	N/A
548	OG0000027	Gh_A12G2531	Zm00001d038700	NA	O-methyltransferase family protein	O-methyltransferase family protein	N/A
549	OG0000027	Gh_A12G2531	Zm00001d029359	NA	O-methyltransferase family protein	O-methyltransferase family protein	N/A
550	OG0000027	Gh_A12G2531	Zm00001d029356	NA	O-methyltransferase family protein	O-methyltransferase family protein	N/A
551	OG0000027	Gh_A12G2531	Zm00001d004921	NA	O-methyltransferase family protein	O-methyltransferase family protein	N/A
552	OG0000027	Gh_A12G2531	Zm00001d049265	NA	O-methyltransferase family protein	O-methyltransferase family protein	N/A
553	OG0000027	Gh_A12G2531	Zm00001d049181	NA	O-methyltransferase family protein	O-methyltransferase family protein	N/A
554	OG0000027	Gh_D02G1848	Zm00001d032083	NA	O-methyltransferase family protein	O-methyltransferase family protein	N/A
555	OG0000027	Gh_D02G1848	Zm00001d010736	NA	O-methyltransferase family protein	O-methyltransferase family protein	N/A
556	OG0000027	Gh_D02G1848	Zm00001d053156	NA	O-methyltransferase family protein	O-methyltransferase family protein	N/A
557	OG0000027	Gh_D02G1848	Zm00001d038700	NA	O-methyltransferase family protein	O-methyltransferase family protein	N/A
558	OG0000027	Gh_D02G1848	Zm00001d029359	NA	O-methyltransferase family protein	O-methyltransferase family protein	N/A
559	OG0000027	Gh_D02G1848	Zm00001d029356	NA	O-methyltransferase family protein	O-methyltransferase family protein	N/A
560	OG0000027	Gh_D02G1848	Zm00001d004921	NA	O-methyltransferase family protein	O-methyltransferase family protein	N/A
561	OG0000027	Gh_D02G1848	Zm00001d049265	NA	O-methyltransferase family protein	O-methyltransferase family protein	N/A
562	OG0000027	Gh_D02G1848	Zm00001d049181	NA	O-methyltransferase family protein	O-methyltransferase family protein	N/A
563	OG0000027	Gh_D02G1849	Zm00001d032083	NA	O-methyltransferase family protein	O-methyltransferase family protein	N/A
564	OG0000027	Gh_D02G1849	Zm00001d010736	NA	O-methyltransferase family protein	O-methyltransferase family protein	N/A
565	OG0000027	Gh_D02G1849	Zm00001d053156	NA	O-methyltransferase family protein	O-methyltransferase family protein	N/A
566	OG0000027	Gh_D02G1849	Zm00001d038700	NA	O-methyltransferase family protein	O-methyltransferase family protein	N/A
567	OG0000027	Gh_D02G1849	Zm00001d029359	NA	O-methyltransferase family protein	O-methyltransferase family protein	N/A
568	OG0000027	Gh_D02G1849	Zm00001d029356	NA	O-methyltransferase family protein	O-methyltransferase family protein	N/A
569	OG0000027	Gh_D02G1849	Zm00001d004921	NA	O-methyltransferase family protein	O-methyltransferase family protein	N/A
570	OG0000027	Gh_D02G1849	Zm00001d049265	NA	O-methyltransferase family protein	O-methyltransferase family protein	N/A
571	OG0000027	Gh_D02G1849	Zm00001d049181	NA	O-methyltransferase family protein	O-methyltransferase family protein	N/A
572	OG0000027	Gh_D02G1850	Zm00001d032083	NA	O-methyltransferase family protein	O-methyltransferase family protein	N/A
573	OG0000027	Gh_D02G1850	Zm00001d010736	NA	O-methyltransferase family protein	O-methyltransferase family protein	N/A
574	OG0000027	Gh_D02G1850	Zm00001d053156	NA	O-methyltransferase family protein	O-methyltransferase family protein	N/A
575	OG0000027	Gh_D02G1850	Zm00001d038700	NA	O-methyltransferase family protein	O-methyltransferase family protein	N/A
576	OG0000027	Gh_D02G1850	Zm00001d029359	NA	O-methyltransferase family protein	O-methyltransferase family protein	N/A
577	OG0000027	Gh_D02G1850	Zm00001d029356	NA	O-methyltransferase family protein	O-methyltransferase family protein	N/A
578	OG0000027	Gh_D02G1850	Zm00001d004921	NA	O-methyltransferase family protein	O-methyltransferase family protein	N/A
579	OG0000027	Gh_D02G1850	Zm00001d049265	NA	O-methyltransferase family protein	O-methyltransferase family protein	N/A
580	OG0000027	Gh_D02G1850	Zm00001d049181	NA	O-methyltransferase family protein	O-methyltransferase family protein	N/A
581	OG0000027	Gh_D02G1851	Zm00001d032083	NA	O-methyltransferase family protein	O-methyltransferase family protein	N/A
582	OG0000027	Gh_D02G1851	Zm00001d010736	NA	O-methyltransferase family protein	O-methyltransferase family protein	N/A
583	OG0000027	Gh_D02G1851	Zm00001d053156	NA	O-methyltransferase family protein	O-methyltransferase family protein	N/A
584	OG0000027	Gh_D02G1851	Zm00001d038700	NA	O-methyltransferase family protein	O-methyltransferase family protein	N/A
585	OG0000027	Gh_D02G1851	Zm00001d029359	NA	O-methyltransferase family protein	O-methyltransferase family protein	N/A
586	OG0000027	Gh_D02G1851	Zm00001d029356	NA	O-methyltransferase family protein	O-methyltransferase family protein	N/A
587	OG0000027	Gh_D02G1851	Zm00001d004921	NA	O-methyltransferase family protein	O-methyltransferase family protein	N/A
588	OG0000027	Gh_D02G1851	Zm00001d049265	NA	O-methyltransferase family protein	O-methyltransferase family protein	N/A
589	OG0000027	Gh_D02G1851	Zm00001d049181	NA	O-methyltransferase family protein	O-methyltransferase family protein	N/A
590	OG0000027	Gh_D04G1661	Zm00001d032083	NA	O-methyltransferase family protein	O-methyltransferase family protein	N/A
591	OG0000027	Gh_D04G1661	Zm00001d010736	NA	O-methyltransferase family protein	O-methyltransferase family protein	N/A
592	OG0000027	Gh_D04G1661	Zm00001d053156	NA	O-methyltransferase family protein	O-methyltransferase family protein	N/A
593	OG0000027	Gh_D04G1661	Zm00001d038700	NA	O-methyltransferase family protein	O-methyltransferase family protein	N/A
594	OG0000027	Gh_D04G1661	Zm00001d029359	NA	O-methyltransferase family protein	O-methyltransferase family protein	N/A
595	OG0000027	Gh_D04G1661	Zm00001d029356	NA	O-methyltransferase family protein	O-methyltransferase family protein	N/A
596	OG0000027	Gh_D04G1661	Zm00001d004921	NA	O-methyltransferase family protein	O-methyltransferase family protein	N/A
597	OG0000027	Gh_D04G1661	Zm00001d049265	NA	O-methyltransferase family protein	O-methyltransferase family protein	N/A
598	OG0000027	Gh_D04G1661	Zm00001d049181	NA	O-methyltransferase family protein	O-methyltransferase family protein	N/A
599	OG0000027	Gh_D04G1662	Zm00001d032083	NA	O-methyltransferase family protein	O-methyltransferase family protein	N/A
600	OG0000027	Gh_D04G1662	Zm00001d010736	NA	O-methyltransferase family protein	O-methyltransferase family protein	N/A
601	OG0000027	Gh_D04G1662	Zm00001d053156	NA	O-methyltransferase family protein	O-methyltransferase family protein	N/A
602	OG0000027	Gh_D04G1662	Zm00001d038700	NA	O-methyltransferase family protein	O-methyltransferase family protein	N/A
603	OG0000027	Gh_D04G1662	Zm00001d029359	NA	O-methyltransferase family protein	O-methyltransferase family protein	N/A
604	OG0000027	Gh_D04G1662	Zm00001d029356	NA	O-methyltransferase family protein	O-methyltransferase family protein	N/A
605	OG0000027	Gh_D04G1662	Zm00001d004921	NA	O-methyltransferase family protein	O-methyltransferase family protein	N/A
606	OG0000027	Gh_D04G1662	Zm00001d049265	NA	O-methyltransferase family protein	O-methyltransferase family protein	N/A
607	OG0000027	Gh_D04G1662	Zm00001d049181	NA	O-methyltransferase family protein	O-methyltransferase family protein	N/A
608	OG0000027	Gh_D04G1663	Zm00001d019613	NA	O-methyltransferase family protein	O-methyltransferase family protein	N/A
609	OG0000027	Gh_D04G1663	Zm00001d024120	NA	O-methyltransferase family protein	O-methyltransferase family protein	N/A
610	OG0000027	Gh_D04G1663	Zm00001d032083	NA	O-methyltransferase family protein	O-methyltransferase family protein	N/A
611	OG0000027	Gh_D04G1663	Zm00001d023257	NA	O-methyltransferase family protein	O-methyltransferase family protein	N/A
612	OG0000027	Gh_D04G1663	Zm00001d023254	NA	O-methyltransferase family protein	O-methyltransferase family protein	N/A
613	OG0000027	Gh_D04G1663	Zm00001d049020	NA	O-methyltransferase family protein	O-methyltransferase family protein	N/A
614	OG0000027	Gh_D04G1663	Zm00001d010736	NA	O-methyltransferase family protein	O-methyltransferase family protein	N/A
615	OG0000027	Gh_D04G1663	Zm00001d053156	NA	O-methyltransferase family protein	O-methyltransferase family protein	N/A
616	OG0000027	Gh_D04G1663	Zm00001d038699	NA	O-methyltransferase family protein	O-methyltransferase family protein	N/A
617	OG0000027	Gh_D04G1663	Zm00001d038702	NA	O-methyltransferase family protein	O-methyltransferase family protein	N/A
618	OG0000027	Gh_D04G1663	Zm00001d038703	NA	O-methyltransferase family protein	O-methyltransferase family protein	N/A
619	OG0000027	Gh_D04G1663	Zm00001d049303	NA	O-methyltransferase family protein	O-methyltransferase family protein	N/A
620	OG0000027	Gh_D04G1663	Zm00001d052684	NA	O-methyltransferase family protein	O-methyltransferase family protein	N/A
621	OG0000027	Gh_D04G1663	Zm00001d052683	NA	O-methyltransferase family protein	O-methyltransferase family protein	N/A
622	OG0000027	Gh_D04G1663	Zm00001d038700	NA	O-methyltransferase family protein	O-methyltransferase family protein	N/A
623	OG0000027	Gh_D04G1663	Zm00001d047192	NA	O-methyltransferase family protein	O-methyltransferase family protein	N/A
624	OG0000027	Gh_D04G1663	Zm00001d029359	NA	O-methyltransferase family protein	O-methyltransferase family protein	N/A
625	OG0000027	Gh_D04G1663	Zm00001d029353	NA	O-methyltransferase family protein	O-methyltransferase family protein	N/A
626	OG0000027	Gh_D04G1663	Zm00001d029356	NA	O-methyltransferase family protein	O-methyltransferase family protein	N/A
627	OG0000027	Gh_D04G1663	Zm00001d004921	NA	O-methyltransferase family protein	O-methyltransferase family protein	N/A
628	OG0000027	Gh_D04G1663	Zm00001d047194	NA	O-methyltransferase family protein	O-methyltransferase family protein	N/A
629	OG0000027	Gh_D04G1663	Zm00001d051934	NA	O-methyltransferase family protein	O-methyltransferase family protein	N/A
630	OG0000027	Gh_D04G1663	Zm00001d049265	NA	O-methyltransferase family protein	O-methyltransferase family protein	N/A
631	OG0000027	Gh_D04G1663	Zm00001d049181	NA	O-methyltransferase family protein	O-methyltransferase family protein	N/A
632	OG0000027	Gh_D04G1663	Zm00001d049179	NA	O-methyltransferase family protein	O-methyltransferase family protein	N/A
633	OG0000027	Gh_D04G1664	Zm00001d032083	NA	O-methyltransferase family protein	O-methyltransferase family protein	N/A
634	OG0000027	Gh_D04G1664	Zm00001d010736	NA	O-methyltransferase family protein	O-methyltransferase family protein	N/A
635	OG0000027	Gh_D04G1664	Zm00001d053156	NA	O-methyltransferase family protein	O-methyltransferase family protein	N/A
636	OG0000027	Gh_D04G1664	Zm00001d038700	NA	O-methyltransferase family protein	O-methyltransferase family protein	N/A
637	OG0000027	Gh_D04G1664	Zm00001d029359	NA	O-methyltransferase family protein	O-methyltransferase family protein	N/A
638	OG0000027	Gh_D04G1664	Zm00001d029356	NA	O-methyltransferase family protein	O-methyltransferase family protein	N/A
639	OG0000027	Gh_D04G1664	Zm00001d004921	NA	O-methyltransferase family protein	O-methyltransferase family protein	N/A
640	OG0000027	Gh_D04G1664	Zm00001d049265	NA	O-methyltransferase family protein	O-methyltransferase family protein	N/A
641	OG0000027	Gh_D04G1664	Zm00001d049181	NA	O-methyltransferase family protein	O-methyltransferase family protein	N/A
642	OG0000027	Gh_D04G1666	Zm00001d032083	NA	O-methyltransferase family protein	O-methyltransferase family protein	N/A
643	OG0000027	Gh_D04G1666	Zm00001d010736	NA	O-methyltransferase family protein	O-methyltransferase family protein	N/A
644	OG0000027	Gh_D04G1666	Zm00001d053156	NA	O-methyltransferase family protein	O-methyltransferase family protein	N/A
645	OG0000027	Gh_D04G1666	Zm00001d038700	NA	O-methyltransferase family protein	O-methyltransferase family protein	N/A
646	OG0000027	Gh_D04G1666	Zm00001d029359	NA	O-methyltransferase family protein	O-methyltransferase family protein	N/A
647	OG0000027	Gh_D04G1666	Zm00001d029356	NA	O-methyltransferase family protein	O-methyltransferase family protein	N/A
648	OG0000027	Gh_D04G1666	Zm00001d004921	NA	O-methyltransferase family protein	O-methyltransferase family protein	N/A
649	OG0000027	Gh_D04G1666	Zm00001d049265	NA	O-methyltransferase family protein	O-methyltransferase family protein	N/A
650	OG0000027	Gh_D04G1666	Zm00001d049181	NA	O-methyltransferase family protein	O-methyltransferase family protein	N/A
651	OG0000027	Gh_D12G0339	Zm00001d032083	NA	O-methyltransferase family protein	O-methyltransferase family protein	N/A
652	OG0000027	Gh_D12G0339	Zm00001d010736	NA	O-methyltransferase family protein	O-methyltransferase family protein	N/A
653	OG0000027	Gh_D12G0339	Zm00001d053156	NA	O-methyltransferase family protein	O-methyltransferase family protein	N/A
654	OG0000027	Gh_D12G0339	Zm00001d038700	NA	O-methyltransferase family protein	O-methyltransferase family protein	N/A
655	OG0000027	Gh_D12G0339	Zm00001d029359	NA	O-methyltransferase family protein	O-methyltransferase family protein	N/A
656	OG0000027	Gh_D12G0339	Zm00001d029356	NA	O-methyltransferase family protein	O-methyltransferase family protein	N/A
657	OG0000027	Gh_D12G0339	Zm00001d004921	NA	O-methyltransferase family protein	O-methyltransferase family protein	N/A
658	OG0000027	Gh_D12G0339	Zm00001d049265	NA	O-methyltransferase family protein	O-methyltransferase family protein	N/A
659	OG0000027	Gh_D12G0339	Zm00001d049181	NA	O-methyltransferase family protein	O-methyltransferase family protein	N/A
660	OG0000027	Gh_Sca005495G01	Zm00001d032083	NA	O-methyltransferase family protein	O-methyltransferase family protein	N/A
661	OG0000027	Gh_Sca005495G01	Zm00001d010736	NA	O-methyltransferase family protein	O-methyltransferase family protein	N/A
662	OG0000027	Gh_Sca005495G01	Zm00001d053156	NA	O-methyltransferase family protein	O-methyltransferase family protein	N/A
663	OG0000027	Gh_Sca005495G01	Zm00001d038700	NA	O-methyltransferase family protein	O-methyltransferase family protein	N/A
664	OG0000027	Gh_Sca005495G01	Zm00001d029359	NA	O-methyltransferase family protein	O-methyltransferase family protein	N/A
665	OG0000027	Gh_Sca005495G01	Zm00001d029356	NA	O-methyltransferase family protein	O-methyltransferase family protein	N/A
666	OG0000027	Gh_Sca005495G01	Zm00001d004921	NA	O-methyltransferase family protein	O-methyltransferase family protein	N/A
667	OG0000027	Gh_Sca005495G01	Zm00001d049265	NA	O-methyltransferase family protein	O-methyltransferase family protein	N/A
668	OG0000027	Gh_Sca005495G01	Zm00001d049181	NA	O-methyltransferase family protein	O-methyltransferase family protein	N/A
669	OG0000027	Gh_Sca005495G02	Zm00001d019613	Zm00001d029356	O-methyltransferase family protein	O-methyltransferase family protein	O-methyltransferase family protein
670	OG0000027	Gh_Sca005495G02	Zm00001d019613	Zm00001d029359	O-methyltransferase family protein	O-methyltransferase family protein	O-methyltransferase family protein
671	OG0000027	Gh_Sca005495G02	Zm00001d019613	Zm00001d004921	O-methyltransferase family protein	O-methyltransferase family protein	O-methyltransferase family protein
672	OG0000027	Gh_Sca005495G02	Zm00001d019613	Zm00001d049181	O-methyltransferase family protein	O-methyltransferase family protein	O-methyltransferase family protein
673	OG0000027	Gh_Sca005495G02	Zm00001d019613	Zm00001d038700	O-methyltransferase family protein	O-methyltransferase family protein	O-methyltransferase family protein
674	OG0000027	Gh_Sca005495G02	Zm00001d019613	Zm00001d010736	O-methyltransferase family protein	O-methyltransferase family protein	O-methyltransferase family protein
675	OG0000027	Gh_Sca005495G02	Zm00001d024120	Zm00001d029356	O-methyltransferase family protein	O-methyltransferase family protein	O-methyltransferase family protein
676	OG0000027	Gh_Sca005495G02	Zm00001d024120	Zm00001d029359	O-methyltransferase family protein	O-methyltransferase family protein	O-methyltransferase family protein
677	OG0000027	Gh_Sca005495G02	Zm00001d024120	Zm00001d004921	O-methyltransferase family protein	O-methyltransferase family protein	O-methyltransferase family protein
678	OG0000027	Gh_Sca005495G02	Zm00001d024120	Zm00001d049181	O-methyltransferase family protein	O-methyltransferase family protein	O-methyltransferase family protein
679	OG0000027	Gh_Sca005495G02	Zm00001d024120	Zm00001d038700	O-methyltransferase family protein	O-methyltransferase family protein	O-methyltransferase family protein
680	OG0000027	Gh_Sca005495G02	Zm00001d024120	Zm00001d010736	O-methyltransferase family protein	O-methyltransferase family protein	O-methyltransferase family protein
681	OG0000027	Gh_Sca005495G02	Zm00001d032083	Zm00001d029356	O-methyltransferase family protein	O-methyltransferase family protein	O-methyltransferase family protein
682	OG0000027	Gh_Sca005495G02	Zm00001d032083	Zm00001d029359	O-methyltransferase family protein	O-methyltransferase family protein	O-methyltransferase family protein
683	OG0000027	Gh_Sca005495G02	Zm00001d032083	Zm00001d004921	O-methyltransferase family protein	O-methyltransferase family protein	O-methyltransferase family protein
684	OG0000027	Gh_Sca005495G02	Zm00001d032083	Zm00001d049179	O-methyltransferase family protein	O-methyltransferase family protein	O-methyltransferase family protein
685	OG0000027	Gh_Sca005495G02	Zm00001d032083	Zm00001d049181	O-methyltransferase family protein	O-methyltransferase family protein	O-methyltransferase family protein
686	OG0000027	Gh_Sca005495G02	Zm00001d032083	Zm00001d051934	O-methyltransferase family protein	O-methyltransferase family protein	O-methyltransferase family protein
687	OG0000027	Gh_Sca005495G02	Zm00001d032083	Zm00001d052683	O-methyltransferase family protein	O-methyltransferase family protein	O-methyltransferase family protein
688	OG0000027	Gh_Sca005495G02	Zm00001d032083	Zm00001d052684	O-methyltransferase family protein	O-methyltransferase family protein	O-methyltransferase family protein
689	OG0000027	Gh_Sca005495G02	Zm00001d032083	Zm00001d038699	O-methyltransferase family protein	O-methyltransferase family protein	O-methyltransferase family protein
690	OG0000027	Gh_Sca005495G02	Zm00001d032083	Zm00001d038700	O-methyltransferase family protein	O-methyltransferase family protein	O-methyltransferase family protein
691	OG0000027	Gh_Sca005495G02	Zm00001d032083	Zm00001d019613	O-methyltransferase family protein	O-methyltransferase family protein	O-methyltransferase family protein
692	OG0000027	Gh_Sca005495G02	Zm00001d032083	Zm00001d010736	O-methyltransferase family protein	O-methyltransferase family protein	O-methyltransferase family protein
693	OG0000027	Gh_Sca005495G02	Zm00001d032083	Zm00001d047192	O-methyltransferase family protein	O-methyltransferase family protein	O-methyltransferase family protein
694	OG0000027	Gh_Sca005495G02	Zm00001d032083	Zm00001d047194	O-methyltransferase family protein	O-methyltransferase family protein	O-methyltransferase family protein
695	OG0000027	Gh_Sca005495G02	Zm00001d023257	Zm00001d029356	O-methyltransferase family protein	O-methyltransferase family protein	O-methyltransferase family protein
696	OG0000027	Gh_Sca005495G02	Zm00001d023257	Zm00001d029359	O-methyltransferase family protein	O-methyltransferase family protein	O-methyltransferase family protein
697	OG0000027	Gh_Sca005495G02	Zm00001d023257	Zm00001d004921	O-methyltransferase family protein	O-methyltransferase family protein	O-methyltransferase family protein
698	OG0000027	Gh_Sca005495G02	Zm00001d023257	Zm00001d049181	O-methyltransferase family protein	O-methyltransferase family protein	O-methyltransferase family protein
699	OG0000027	Gh_Sca005495G02	Zm00001d023257	Zm00001d038700	O-methyltransferase family protein	O-methyltransferase family protein	O-methyltransferase family protein
700	OG0000027	Gh_Sca005495G02	Zm00001d023257	Zm00001d010736	O-methyltransferase family protein	O-methyltransferase family protein	O-methyltransferase family protein
701	OG0000027	Gh_Sca005495G02	Zm00001d023254	Zm00001d029356	O-methyltransferase family protein	O-methyltransferase family protein	O-methyltransferase family protein
702	OG0000027	Gh_Sca005495G02	Zm00001d023254	Zm00001d029359	O-methyltransferase family protein	O-methyltransferase family protein	O-methyltransferase family protein
703	OG0000027	Gh_Sca005495G02	Zm00001d023254	Zm00001d004921	O-methyltransferase family protein	O-methyltransferase family protein	O-methyltransferase family protein
704	OG0000027	Gh_Sca005495G02	Zm00001d023254	Zm00001d049181	O-methyltransferase family protein	O-methyltransferase family protein	O-methyltransferase family protein
705	OG0000027	Gh_Sca005495G02	Zm00001d023254	Zm00001d038700	O-methyltransferase family protein	O-methyltransferase family protein	O-methyltransferase family protein
706	OG0000027	Gh_Sca005495G02	Zm00001d023254	Zm00001d010736	O-methyltransferase family protein	O-methyltransferase family protein	O-methyltransferase family protein
707	OG0000027	Gh_Sca005495G02	Zm00001d049020	Zm00001d029356	O-methyltransferase family protein	O-methyltransferase family protein	O-methyltransferase family protein
708	OG0000027	Gh_Sca005495G02	Zm00001d049020	Zm00001d029359	O-methyltransferase family protein	O-methyltransferase family protein	O-methyltransferase family protein
709	OG0000027	Gh_Sca005495G02	Zm00001d049020	Zm00001d004921	O-methyltransferase family protein	O-methyltransferase family protein	O-methyltransferase family protein
710	OG0000027	Gh_Sca005495G02	Zm00001d049020	Zm00001d049181	O-methyltransferase family protein	O-methyltransferase family protein	O-methyltransferase family protein
711	OG0000027	Gh_Sca005495G02	Zm00001d049020	Zm00001d038700	O-methyltransferase family protein	O-methyltransferase family protein	O-methyltransferase family protein
712	OG0000027	Gh_Sca005495G02	Zm00001d049020	Zm00001d010736	O-methyltransferase family protein	O-methyltransferase family protein	O-methyltransferase family protein
713	OG0000027	Gh_Sca005495G02	Zm00001d010736	Zm00001d029356	O-methyltransferase family protein	O-methyltransferase family protein	O-methyltransferase family protein
714	OG0000027	Gh_Sca005495G02	Zm00001d010736	Zm00001d029359	O-methyltransferase family protein	O-methyltransferase family protein	O-methyltransferase family protein
715	OG0000027	Gh_Sca005495G02	Zm00001d010736	Zm00001d004921	O-methyltransferase family protein	O-methyltransferase family protein	O-methyltransferase family protein
716	OG0000027	Gh_Sca005495G02	Zm00001d010736	Zm00001d049179	O-methyltransferase family protein	O-methyltransferase family protein	O-methyltransferase family protein
717	OG0000027	Gh_Sca005495G02	Zm00001d010736	Zm00001d049181	O-methyltransferase family protein	O-methyltransferase family protein	O-methyltransferase family protein
718	OG0000027	Gh_Sca005495G02	Zm00001d010736	Zm00001d051934	O-methyltransferase family protein	O-methyltransferase family protein	O-methyltransferase family protein
719	OG0000027	Gh_Sca005495G02	Zm00001d010736	Zm00001d052683	O-methyltransferase family protein	O-methyltransferase family protein	O-methyltransferase family protein
720	OG0000027	Gh_Sca005495G02	Zm00001d010736	Zm00001d052684	O-methyltransferase family protein	O-methyltransferase family protein	O-methyltransferase family protein
721	OG0000027	Gh_Sca005495G02	Zm00001d010736	Zm00001d038699	O-methyltransferase family protein	O-methyltransferase family protein	O-methyltransferase family protein
722	OG0000027	Gh_Sca005495G02	Zm00001d010736	Zm00001d038700	O-methyltransferase family protein	O-methyltransferase family protein	O-methyltransferase family protein
723	OG0000027	Gh_Sca005495G02	Zm00001d010736	Zm00001d019613	O-methyltransferase family protein	O-methyltransferase family protein	O-methyltransferase family protein
724	OG0000027	Gh_Sca005495G02	Zm00001d010736	Zm00001d010736	O-methyltransferase family protein	O-methyltransferase family protein	O-methyltransferase family protein
725	OG0000027	Gh_Sca005495G02	Zm00001d010736	Zm00001d047192	O-methyltransferase family protein	O-methyltransferase family protein	O-methyltransferase family protein
726	OG0000027	Gh_Sca005495G02	Zm00001d010736	Zm00001d047194	O-methyltransferase family protein	O-methyltransferase family protein	O-methyltransferase family protein
727	OG0000027	Gh_Sca005495G02	Zm00001d053156	Zm00001d029356	O-methyltransferase family protein	O-methyltransferase family protein	O-methyltransferase family protein
728	OG0000027	Gh_Sca005495G02	Zm00001d053156	Zm00001d029359	O-methyltransferase family protein	O-methyltransferase family protein	O-methyltransferase family protein
729	OG0000027	Gh_Sca005495G02	Zm00001d053156	Zm00001d004921	O-methyltransferase family protein	O-methyltransferase family protein	O-methyltransferase family protein
730	OG0000027	Gh_Sca005495G02	Zm00001d053156	Zm00001d049179	O-methyltransferase family protein	O-methyltransferase family protein	O-methyltransferase family protein
731	OG0000027	Gh_Sca005495G02	Zm00001d053156	Zm00001d049181	O-methyltransferase family protein	O-methyltransferase family protein	O-methyltransferase family protein
732	OG0000027	Gh_Sca005495G02	Zm00001d053156	Zm00001d051934	O-methyltransferase family protein	O-methyltransferase family protein	O-methyltransferase family protein
733	OG0000027	Gh_Sca005495G02	Zm00001d053156	Zm00001d052683	O-methyltransferase family protein	O-methyltransferase family protein	O-methyltransferase family protein
734	OG0000027	Gh_Sca005495G02	Zm00001d053156	Zm00001d052684	O-methyltransferase family protein	O-methyltransferase family protein	O-methyltransferase family protein
735	OG0000027	Gh_Sca005495G02	Zm00001d053156	Zm00001d038699	O-methyltransferase family protein	O-methyltransferase family protein	O-methyltransferase family protein
736	OG0000027	Gh_Sca005495G02	Zm00001d053156	Zm00001d038700	O-methyltransferase family protein	O-methyltransferase family protein	O-methyltransferase family protein
737	OG0000027	Gh_Sca005495G02	Zm00001d053156	Zm00001d019613	O-methyltransferase family protein	O-methyltransferase family protein	O-methyltransferase family protein
738	OG0000027	Gh_Sca005495G02	Zm00001d053156	Zm00001d010736	O-methyltransferase family protein	O-methyltransferase family protein	O-methyltransferase family protein
739	OG0000027	Gh_Sca005495G02	Zm00001d053156	Zm00001d047192	O-methyltransferase family protein	O-methyltransferase family protein	O-methyltransferase family protein
740	OG0000027	Gh_Sca005495G02	Zm00001d053156	Zm00001d047194	O-methyltransferase family protein	O-methyltransferase family protein	O-methyltransferase family protein
741	OG0000027	Gh_Sca005495G02	Zm00001d038699	Zm00001d029356	O-methyltransferase family protein	O-methyltransferase family protein	O-methyltransferase family protein
742	OG0000027	Gh_Sca005495G02	Zm00001d038699	Zm00001d029359	O-methyltransferase family protein	O-methyltransferase family protein	O-methyltransferase family protein
743	OG0000027	Gh_Sca005495G02	Zm00001d038699	Zm00001d004921	O-methyltransferase family protein	O-methyltransferase family protein	O-methyltransferase family protein
744	OG0000027	Gh_Sca005495G02	Zm00001d038699	Zm00001d049181	O-methyltransferase family protein	O-methyltransferase family protein	O-methyltransferase family protein
745	OG0000027	Gh_Sca005495G02	Zm00001d038699	Zm00001d038700	O-methyltransferase family protein	O-methyltransferase family protein	O-methyltransferase family protein
746	OG0000027	Gh_Sca005495G02	Zm00001d038699	Zm00001d010736	O-methyltransferase family protein	O-methyltransferase family protein	O-methyltransferase family protein
747	OG0000027	Gh_Sca005495G02	Zm00001d038702	Zm00001d029356	O-methyltransferase family protein	O-methyltransferase family protein	O-methyltransferase family protein
748	OG0000027	Gh_Sca005495G02	Zm00001d038702	Zm00001d029359	O-methyltransferase family protein	O-methyltransferase family protein	O-methyltransferase family protein
749	OG0000027	Gh_Sca005495G02	Zm00001d038702	Zm00001d004921	O-methyltransferase family protein	O-methyltransferase family protein	O-methyltransferase family protein
750	OG0000027	Gh_Sca005495G02	Zm00001d038702	Zm00001d049181	O-methyltransferase family protein	O-methyltransferase family protein	O-methyltransferase family protein
751	OG0000027	Gh_Sca005495G02	Zm00001d038702	Zm00001d038700	O-methyltransferase family protein	O-methyltransferase family protein	O-methyltransferase family protein
752	OG0000027	Gh_Sca005495G02	Zm00001d038702	Zm00001d010736	O-methyltransferase family protein	O-methyltransferase family protein	O-methyltransferase family protein
753	OG0000027	Gh_Sca005495G02	Zm00001d038703	Zm00001d029356	O-methyltransferase family protein	O-methyltransferase family protein	O-methyltransferase family protein
754	OG0000027	Gh_Sca005495G02	Zm00001d038703	Zm00001d029359	O-methyltransferase family protein	O-methyltransferase family protein	O-methyltransferase family protein
755	OG0000027	Gh_Sca005495G02	Zm00001d038703	Zm00001d004921	O-methyltransferase family protein	O-methyltransferase family protein	O-methyltransferase family protein
756	OG0000027	Gh_Sca005495G02	Zm00001d038703	Zm00001d049181	O-methyltransferase family protein	O-methyltransferase family protein	O-methyltransferase family protein
757	OG0000027	Gh_Sca005495G02	Zm00001d038703	Zm00001d038700	O-methyltransferase family protein	O-methyltransferase family protein	O-methyltransferase family protein
758	OG0000027	Gh_Sca005495G02	Zm00001d038703	Zm00001d010736	O-methyltransferase family protein	O-methyltransferase family protein	O-methyltransferase family protein
759	OG0000027	Gh_Sca005495G02	Zm00001d049303	Zm00001d029356	O-methyltransferase family protein	O-methyltransferase family protein	O-methyltransferase family protein
760	OG0000027	Gh_Sca005495G02	Zm00001d049303	Zm00001d029359	O-methyltransferase family protein	O-methyltransferase family protein	O-methyltransferase family protein
761	OG0000027	Gh_Sca005495G02	Zm00001d049303	Zm00001d004921	O-methyltransferase family protein	O-methyltransferase family protein	O-methyltransferase family protein
762	OG0000027	Gh_Sca005495G02	Zm00001d049303	Zm00001d049181	O-methyltransferase family protein	O-methyltransferase family protein	O-methyltransferase family protein
763	OG0000027	Gh_Sca005495G02	Zm00001d049303	Zm00001d038700	O-methyltransferase family protein	O-methyltransferase family protein	O-methyltransferase family protein
764	OG0000027	Gh_Sca005495G02	Zm00001d049303	Zm00001d010736	O-methyltransferase family protein	O-methyltransferase family protein	O-methyltransferase family protein
765	OG0000027	Gh_Sca005495G02	Zm00001d052684	Zm00001d029356	O-methyltransferase family protein	O-methyltransferase family protein	O-methyltransferase family protein
766	OG0000027	Gh_Sca005495G02	Zm00001d052684	Zm00001d029359	O-methyltransferase family protein	O-methyltransferase family protein	O-methyltransferase family protein
767	OG0000027	Gh_Sca005495G02	Zm00001d052684	Zm00001d004921	O-methyltransferase family protein	O-methyltransferase family protein	O-methyltransferase family protein
768	OG0000027	Gh_Sca005495G02	Zm00001d052684	Zm00001d049181	O-methyltransferase family protein	O-methyltransferase family protein	O-methyltransferase family protein
769	OG0000027	Gh_Sca005495G02	Zm00001d052684	Zm00001d038700	O-methyltransferase family protein	O-methyltransferase family protein	O-methyltransferase family protein
770	OG0000027	Gh_Sca005495G02	Zm00001d052684	Zm00001d010736	O-methyltransferase family protein	O-methyltransferase family protein	O-methyltransferase family protein
771	OG0000027	Gh_Sca005495G02	Zm00001d052683	Zm00001d029356	O-methyltransferase family protein	O-methyltransferase family protein	O-methyltransferase family protein
772	OG0000027	Gh_Sca005495G02	Zm00001d052683	Zm00001d029359	O-methyltransferase family protein	O-methyltransferase family protein	O-methyltransferase family protein
773	OG0000027	Gh_Sca005495G02	Zm00001d052683	Zm00001d004921	O-methyltransferase family protein	O-methyltransferase family protein	O-methyltransferase family protein
774	OG0000027	Gh_Sca005495G02	Zm00001d052683	Zm00001d049181	O-methyltransferase family protein	O-methyltransferase family protein	O-methyltransferase family protein
775	OG0000027	Gh_Sca005495G02	Zm00001d052683	Zm00001d038700	O-methyltransferase family protein	O-methyltransferase family protein	O-methyltransferase family protein
776	OG0000027	Gh_Sca005495G02	Zm00001d052683	Zm00001d010736	O-methyltransferase family protein	O-methyltransferase family protein	O-methyltransferase family protein
777	OG0000027	Gh_Sca005495G02	Zm00001d038700	Zm00001d029356	O-methyltransferase family protein	O-methyltransferase family protein	O-methyltransferase family protein
778	OG0000027	Gh_Sca005495G02	Zm00001d038700	Zm00001d029359	O-methyltransferase family protein	O-methyltransferase family protein	O-methyltransferase family protein
779	OG0000027	Gh_Sca005495G02	Zm00001d038700	Zm00001d004921	O-methyltransferase family protein	O-methyltransferase family protein	O-methyltransferase family protein
780	OG0000027	Gh_Sca005495G02	Zm00001d038700	Zm00001d049179	O-methyltransferase family protein	O-methyltransferase family protein	O-methyltransferase family protein
781	OG0000027	Gh_Sca005495G02	Zm00001d038700	Zm00001d049181	O-methyltransferase family protein	O-methyltransferase family protein	O-methyltransferase family protein
782	OG0000027	Gh_Sca005495G02	Zm00001d038700	Zm00001d051934	O-methyltransferase family protein	O-methyltransferase family protein	O-methyltransferase family protein
783	OG0000027	Gh_Sca005495G02	Zm00001d038700	Zm00001d052683	O-methyltransferase family protein	O-methyltransferase family protein	O-methyltransferase family protein
784	OG0000027	Gh_Sca005495G02	Zm00001d038700	Zm00001d052684	O-methyltransferase family protein	O-methyltransferase family protein	O-methyltransferase family protein
785	OG0000027	Gh_Sca005495G02	Zm00001d038700	Zm00001d038699	O-methyltransferase family protein	O-methyltransferase family protein	O-methyltransferase family protein
786	OG0000027	Gh_Sca005495G02	Zm00001d038700	Zm00001d038700	O-methyltransferase family protein	O-methyltransferase family protein	O-methyltransferase family protein
787	OG0000027	Gh_Sca005495G02	Zm00001d038700	Zm00001d019613	O-methyltransferase family protein	O-methyltransferase family protein	O-methyltransferase family protein
788	OG0000027	Gh_Sca005495G02	Zm00001d038700	Zm00001d010736	O-methyltransferase family protein	O-methyltransferase family protein	O-methyltransferase family protein
789	OG0000027	Gh_Sca005495G02	Zm00001d038700	Zm00001d047192	O-methyltransferase family protein	O-methyltransferase family protein	O-methyltransferase family protein
790	OG0000027	Gh_Sca005495G02	Zm00001d038700	Zm00001d047194	O-methyltransferase family protein	O-methyltransferase family protein	O-methyltransferase family protein
791	OG0000027	Gh_Sca005495G02	Zm00001d047192	Zm00001d029356	O-methyltransferase family protein	O-methyltransferase family protein	O-methyltransferase family protein
792	OG0000027	Gh_Sca005495G02	Zm00001d047192	Zm00001d029359	O-methyltransferase family protein	O-methyltransferase family protein	O-methyltransferase family protein
793	OG0000027	Gh_Sca005495G02	Zm00001d047192	Zm00001d004921	O-methyltransferase family protein	O-methyltransferase family protein	O-methyltransferase family protein
794	OG0000027	Gh_Sca005495G02	Zm00001d047192	Zm00001d049181	O-methyltransferase family protein	O-methyltransferase family protein	O-methyltransferase family protein
795	OG0000027	Gh_Sca005495G02	Zm00001d047192	Zm00001d038700	O-methyltransferase family protein	O-methyltransferase family protein	O-methyltransferase family protein
796	OG0000027	Gh_Sca005495G02	Zm00001d047192	Zm00001d010736	O-methyltransferase family protein	O-methyltransferase family protein	O-methyltransferase family protein
797	OG0000027	Gh_Sca005495G02	Zm00001d029359	Zm00001d029356	O-methyltransferase family protein	O-methyltransferase family protein	O-methyltransferase family protein
798	OG0000027	Gh_Sca005495G02	Zm00001d029359	Zm00001d029359	O-methyltransferase family protein	O-methyltransferase family protein	O-methyltransferase family protein
799	OG0000027	Gh_Sca005495G02	Zm00001d029359	Zm00001d004921	O-methyltransferase family protein	O-methyltransferase family protein	O-methyltransferase family protein
800	OG0000027	Gh_Sca005495G02	Zm00001d029359	Zm00001d049179	O-methyltransferase family protein	O-methyltransferase family protein	O-methyltransferase family protein
801	OG0000027	Gh_Sca005495G02	Zm00001d029359	Zm00001d049181	O-methyltransferase family protein	O-methyltransferase family protein	O-methyltransferase family protein
802	OG0000027	Gh_Sca005495G02	Zm00001d029359	Zm00001d051934	O-methyltransferase family protein	O-methyltransferase family protein	O-methyltransferase family protein
803	OG0000027	Gh_Sca005495G02	Zm00001d029359	Zm00001d052683	O-methyltransferase family protein	O-methyltransferase family protein	O-methyltransferase family protein
804	OG0000027	Gh_Sca005495G02	Zm00001d029359	Zm00001d052684	O-methyltransferase family protein	O-methyltransferase family protein	O-methyltransferase family protein
805	OG0000027	Gh_Sca005495G02	Zm00001d029359	Zm00001d038699	O-methyltransferase family protein	O-methyltransferase family protein	O-methyltransferase family protein
806	OG0000027	Gh_Sca005495G02	Zm00001d029359	Zm00001d038700	O-methyltransferase family protein	O-methyltransferase family protein	O-methyltransferase family protein
807	OG0000027	Gh_Sca005495G02	Zm00001d029359	Zm00001d019613	O-methyltransferase family protein	O-methyltransferase family protein	O-methyltransferase family protein
808	OG0000027	Gh_Sca005495G02	Zm00001d029359	Zm00001d010736	O-methyltransferase family protein	O-methyltransferase family protein	O-methyltransferase family protein
809	OG0000027	Gh_Sca005495G02	Zm00001d029359	Zm00001d047192	O-methyltransferase family protein	O-methyltransferase family protein	O-methyltransferase family protein
810	OG0000027	Gh_Sca005495G02	Zm00001d029359	Zm00001d047194	O-methyltransferase family protein	O-methyltransferase family protein	O-methyltransferase family protein
811	OG0000027	Gh_Sca005495G02	Zm00001d029353	Zm00001d029356	O-methyltransferase family protein	O-methyltransferase family protein	O-methyltransferase family protein
812	OG0000027	Gh_Sca005495G02	Zm00001d029353	Zm00001d029359	O-methyltransferase family protein	O-methyltransferase family protein	O-methyltransferase family protein
813	OG0000027	Gh_Sca005495G02	Zm00001d029353	Zm00001d004921	O-methyltransferase family protein	O-methyltransferase family protein	O-methyltransferase family protein
814	OG0000027	Gh_Sca005495G02	Zm00001d029353	Zm00001d049181	O-methyltransferase family protein	O-methyltransferase family protein	O-methyltransferase family protein
815	OG0000027	Gh_Sca005495G02	Zm00001d029353	Zm00001d038700	O-methyltransferase family protein	O-methyltransferase family protein	O-methyltransferase family protein
816	OG0000027	Gh_Sca005495G02	Zm00001d029353	Zm00001d010736	O-methyltransferase family protein	O-methyltransferase family protein	O-methyltransferase family protein
817	OG0000027	Gh_Sca005495G02	Zm00001d029356	Zm00001d029356	O-methyltransferase family protein	O-methyltransferase family protein	O-methyltransferase family protein
818	OG0000027	Gh_Sca005495G02	Zm00001d029356	Zm00001d029359	O-methyltransferase family protein	O-methyltransferase family protein	O-methyltransferase family protein
819	OG0000027	Gh_Sca005495G02	Zm00001d029356	Zm00001d004921	O-methyltransferase family protein	O-methyltransferase family protein	O-methyltransferase family protein
820	OG0000027	Gh_Sca005495G02	Zm00001d029356	Zm00001d049179	O-methyltransferase family protein	O-methyltransferase family protein	O-methyltransferase family protein
821	OG0000027	Gh_Sca005495G02	Zm00001d029356	Zm00001d049181	O-methyltransferase family protein	O-methyltransferase family protein	O-methyltransferase family protein
822	OG0000027	Gh_Sca005495G02	Zm00001d029356	Zm00001d051934	O-methyltransferase family protein	O-methyltransferase family protein	O-methyltransferase family protein
823	OG0000027	Gh_Sca005495G02	Zm00001d029356	Zm00001d052683	O-methyltransferase family protein	O-methyltransferase family protein	O-methyltransferase family protein
824	OG0000027	Gh_Sca005495G02	Zm00001d029356	Zm00001d052684	O-methyltransferase family protein	O-methyltransferase family protein	O-methyltransferase family protein
825	OG0000027	Gh_Sca005495G02	Zm00001d029356	Zm00001d038699	O-methyltransferase family protein	O-methyltransferase family protein	O-methyltransferase family protein
826	OG0000027	Gh_Sca005495G02	Zm00001d029356	Zm00001d038700	O-methyltransferase family protein	O-methyltransferase family protein	O-methyltransferase family protein
827	OG0000027	Gh_Sca005495G02	Zm00001d029356	Zm00001d019613	O-methyltransferase family protein	O-methyltransferase family protein	O-methyltransferase family protein
828	OG0000027	Gh_Sca005495G02	Zm00001d029356	Zm00001d010736	O-methyltransferase family protein	O-methyltransferase family protein	O-methyltransferase family protein
829	OG0000027	Gh_Sca005495G02	Zm00001d029356	Zm00001d047192	O-methyltransferase family protein	O-methyltransferase family protein	O-methyltransferase family protein
830	OG0000027	Gh_Sca005495G02	Zm00001d029356	Zm00001d047194	O-methyltransferase family protein	O-methyltransferase family protein	O-methyltransferase family protein
831	OG0000027	Gh_Sca005495G02	Zm00001d004921	Zm00001d029356	O-methyltransferase family protein	O-methyltransferase family protein	O-methyltransferase family protein
832	OG0000027	Gh_Sca005495G02	Zm00001d004921	Zm00001d029359	O-methyltransferase family protein	O-methyltransferase family protein	O-methyltransferase family protein
833	OG0000027	Gh_Sca005495G02	Zm00001d004921	Zm00001d004921	O-methyltransferase family protein	O-methyltransferase family protein	O-methyltransferase family protein
834	OG0000027	Gh_Sca005495G02	Zm00001d004921	Zm00001d049179	O-methyltransferase family protein	O-methyltransferase family protein	O-methyltransferase family protein
835	OG0000027	Gh_Sca005495G02	Zm00001d004921	Zm00001d049181	O-methyltransferase family protein	O-methyltransferase family protein	O-methyltransferase family protein
836	OG0000027	Gh_Sca005495G02	Zm00001d004921	Zm00001d051934	O-methyltransferase family protein	O-methyltransferase family protein	O-methyltransferase family protein
837	OG0000027	Gh_Sca005495G02	Zm00001d004921	Zm00001d052683	O-methyltransferase family protein	O-methyltransferase family protein	O-methyltransferase family protein
838	OG0000027	Gh_Sca005495G02	Zm00001d004921	Zm00001d052684	O-methyltransferase family protein	O-methyltransferase family protein	O-methyltransferase family protein
839	OG0000027	Gh_Sca005495G02	Zm00001d004921	Zm00001d038699	O-methyltransferase family protein	O-methyltransferase family protein	O-methyltransferase family protein
840	OG0000027	Gh_Sca005495G02	Zm00001d004921	Zm00001d038700	O-methyltransferase family protein	O-methyltransferase family protein	O-methyltransferase family protein
841	OG0000027	Gh_Sca005495G02	Zm00001d004921	Zm00001d019613	O-methyltransferase family protein	O-methyltransferase family protein	O-methyltransferase family protein
842	OG0000027	Gh_Sca005495G02	Zm00001d004921	Zm00001d010736	O-methyltransferase family protein	O-methyltransferase family protein	O-methyltransferase family protein
843	OG0000027	Gh_Sca005495G02	Zm00001d004921	Zm00001d047192	O-methyltransferase family protein	O-methyltransferase family protein	O-methyltransferase family protein
844	OG0000027	Gh_Sca005495G02	Zm00001d004921	Zm00001d047194	O-methyltransferase family protein	O-methyltransferase family protein	O-methyltransferase family protein
845	OG0000027	Gh_Sca005495G02	Zm00001d047194	Zm00001d029356	O-methyltransferase family protein	O-methyltransferase family protein	O-methyltransferase family protein
846	OG0000027	Gh_Sca005495G02	Zm00001d047194	Zm00001d029359	O-methyltransferase family protein	O-methyltransferase family protein	O-methyltransferase family protein
847	OG0000027	Gh_Sca005495G02	Zm00001d047194	Zm00001d004921	O-methyltransferase family protein	O-methyltransferase family protein	O-methyltransferase family protein
848	OG0000027	Gh_Sca005495G02	Zm00001d047194	Zm00001d049181	O-methyltransferase family protein	O-methyltransferase family protein	O-methyltransferase family protein
849	OG0000027	Gh_Sca005495G02	Zm00001d047194	Zm00001d038700	O-methyltransferase family protein	O-methyltransferase family protein	O-methyltransferase family protein
850	OG0000027	Gh_Sca005495G02	Zm00001d047194	Zm00001d010736	O-methyltransferase family protein	O-methyltransferase family protein	O-methyltransferase family protein
851	OG0000027	Gh_Sca005495G02	Zm00001d051934	Zm00001d029356	O-methyltransferase family protein	O-methyltransferase family protein	O-methyltransferase family protein
852	OG0000027	Gh_Sca005495G02	Zm00001d051934	Zm00001d029359	O-methyltransferase family protein	O-methyltransferase family protein	O-methyltransferase family protein
853	OG0000027	Gh_Sca005495G02	Zm00001d051934	Zm00001d004921	O-methyltransferase family protein	O-methyltransferase family protein	O-methyltransferase family protein
854	OG0000027	Gh_Sca005495G02	Zm00001d051934	Zm00001d049181	O-methyltransferase family protein	O-methyltransferase family protein	O-methyltransferase family protein
855	OG0000027	Gh_Sca005495G02	Zm00001d051934	Zm00001d038700	O-methyltransferase family protein	O-methyltransferase family protein	O-methyltransferase family protein
856	OG0000027	Gh_Sca005495G02	Zm00001d051934	Zm00001d010736	O-methyltransferase family protein	O-methyltransferase family protein	O-methyltransferase family protein
857	OG0000027	Gh_Sca005495G02	Zm00001d049265	Zm00001d029356	O-methyltransferase family protein	O-methyltransferase family protein	O-methyltransferase family protein
858	OG0000027	Gh_Sca005495G02	Zm00001d049265	Zm00001d029359	O-methyltransferase family protein	O-methyltransferase family protein	O-methyltransferase family protein
859	OG0000027	Gh_Sca005495G02	Zm00001d049265	Zm00001d004921	O-methyltransferase family protein	O-methyltransferase family protein	O-methyltransferase family protein
860	OG0000027	Gh_Sca005495G02	Zm00001d049265	Zm00001d049179	O-methyltransferase family protein	O-methyltransferase family protein	O-methyltransferase family protein
861	OG0000027	Gh_Sca005495G02	Zm00001d049265	Zm00001d049181	O-methyltransferase family protein	O-methyltransferase family protein	O-methyltransferase family protein
862	OG0000027	Gh_Sca005495G02	Zm00001d049265	Zm00001d051934	O-methyltransferase family protein	O-methyltransferase family protein	O-methyltransferase family protein
863	OG0000027	Gh_Sca005495G02	Zm00001d049265	Zm00001d052683	O-methyltransferase family protein	O-methyltransferase family protein	O-methyltransferase family protein
864	OG0000027	Gh_Sca005495G02	Zm00001d049265	Zm00001d052684	O-methyltransferase family protein	O-methyltransferase family protein	O-methyltransferase family protein
865	OG0000027	Gh_Sca005495G02	Zm00001d049265	Zm00001d038699	O-methyltransferase family protein	O-methyltransferase family protein	O-methyltransferase family protein
866	OG0000027	Gh_Sca005495G02	Zm00001d049265	Zm00001d038700	O-methyltransferase family protein	O-methyltransferase family protein	O-methyltransferase family protein
867	OG0000027	Gh_Sca005495G02	Zm00001d049265	Zm00001d019613	O-methyltransferase family protein	O-methyltransferase family protein	O-methyltransferase family protein
868	OG0000027	Gh_Sca005495G02	Zm00001d049265	Zm00001d010736	O-methyltransferase family protein	O-methyltransferase family protein	O-methyltransferase family protein
869	OG0000027	Gh_Sca005495G02	Zm00001d049265	Zm00001d047192	O-methyltransferase family protein	O-methyltransferase family protein	O-methyltransferase family protein
870	OG0000027	Gh_Sca005495G02	Zm00001d049265	Zm00001d047194	O-methyltransferase family protein	O-methyltransferase family protein	O-methyltransferase family protein
871	OG0000027	Gh_Sca005495G02	Zm00001d049181	Zm00001d029356	O-methyltransferase family protein	O-methyltransferase family protein	O-methyltransferase family protein
872	OG0000027	Gh_Sca005495G02	Zm00001d049181	Zm00001d029359	O-methyltransferase family protein	O-methyltransferase family protein	O-methyltransferase family protein
873	OG0000027	Gh_Sca005495G02	Zm00001d049181	Zm00001d004921	O-methyltransferase family protein	O-methyltransferase family protein	O-methyltransferase family protein
874	OG0000027	Gh_Sca005495G02	Zm00001d049181	Zm00001d049179	O-methyltransferase family protein	O-methyltransferase family protein	O-methyltransferase family protein
875	OG0000027	Gh_Sca005495G02	Zm00001d049181	Zm00001d049181	O-methyltransferase family protein	O-methyltransferase family protein	O-methyltransferase family protein
876	OG0000027	Gh_Sca005495G02	Zm00001d049181	Zm00001d051934	O-methyltransferase family protein	O-methyltransferase family protein	O-methyltransferase family protein
877	OG0000027	Gh_Sca005495G02	Zm00001d049181	Zm00001d052683	O-methyltransferase family protein	O-methyltransferase family protein	O-methyltransferase family protein
878	OG0000027	Gh_Sca005495G02	Zm00001d049181	Zm00001d052684	O-methyltransferase family protein	O-methyltransferase family protein	O-methyltransferase family protein
879	OG0000027	Gh_Sca005495G02	Zm00001d049181	Zm00001d038699	O-methyltransferase family protein	O-methyltransferase family protein	O-methyltransferase family protein
880	OG0000027	Gh_Sca005495G02	Zm00001d049181	Zm00001d038700	O-methyltransferase family protein	O-methyltransferase family protein	O-methyltransferase family protein
881	OG0000027	Gh_Sca005495G02	Zm00001d049181	Zm00001d019613	O-methyltransferase family protein	O-methyltransferase family protein	O-methyltransferase family protein
882	OG0000027	Gh_Sca005495G02	Zm00001d049181	Zm00001d010736	O-methyltransferase family protein	O-methyltransferase family protein	O-methyltransferase family protein
883	OG0000027	Gh_Sca005495G02	Zm00001d049181	Zm00001d047192	O-methyltransferase family protein	O-methyltransferase family protein	O-methyltransferase family protein
884	OG0000027	Gh_Sca005495G02	Zm00001d049181	Zm00001d047194	O-methyltransferase family protein	O-methyltransferase family protein	O-methyltransferase family protein
885	OG0000027	Gh_Sca005495G02	Zm00001d049179	Zm00001d029356	O-methyltransferase family protein	O-methyltransferase family protein	O-methyltransferase family protein
886	OG0000027	Gh_Sca005495G02	Zm00001d049179	Zm00001d029359	O-methyltransferase family protein	O-methyltransferase family protein	O-methyltransferase family protein
887	OG0000027	Gh_Sca005495G02	Zm00001d049179	Zm00001d004921	O-methyltransferase family protein	O-methyltransferase family protein	O-methyltransferase family protein
888	OG0000027	Gh_Sca005495G02	Zm00001d049179	Zm00001d049181	O-methyltransferase family protein	O-methyltransferase family protein	O-methyltransferase family protein
889	OG0000027	Gh_Sca005495G02	Zm00001d049179	Zm00001d038700	O-methyltransferase family protein	O-methyltransferase family protein	O-methyltransferase family protein
890	OG0000027	Gh_Sca005495G02	Zm00001d049179	Zm00001d010736	O-methyltransferase family protein	O-methyltransferase family protein	O-methyltransferase family protein
891	OG0000039	Gh_A06G1294	Zm00001d019727	NA	Protein kinase superfamily protein	Protein kinase superfamily protein	N/A
892	OG0000039	Gh_A06G1294	Zm00001d010687	NA	Protein kinase superfamily protein	Protein kinase superfamily protein	N/A
893	OG0000039	Gh_A06G1294	Zm00001d012600	NA	Protein kinase superfamily protein	Protein kinase superfamily protein	N/A
894	OG0000039	Gh_A06G1294	Zm00001d043227	NA	Protein kinase superfamily protein	Protein kinase superfamily protein	N/A
895	OG0000040	Gh_A03G0384	Zm00001d042104	NA	glutathione S-transferase tau 7	glutathione S-transferase TAU 8	N/A
896	OG0000040	Gh_A09G1508	Zm00001d042104	NA	glutathione S-transferase TAU 8	glutathione S-transferase TAU 8	N/A
897	OG0000040	Gh_A09G1509	Zm00001d042104	NA	glutathione S-transferase TAU 8	glutathione S-transferase TAU 8	N/A
898	OG0000040	Gh_A09G1510	Zm00001d042104	NA	glutathione S-transferase TAU 8	glutathione S-transferase TAU 8	N/A
899	OG0000040	Gh_D03G1155	Zm00001d042104	NA	glutathione S-transferase tau 7	glutathione S-transferase TAU 8	N/A
900	OG0000040	Gh_D03G1156	Zm00001d042104	NA	glutathione S-transferase tau 7	glutathione S-transferase TAU 8	N/A
901	OG0000040	Gh_D09G1520	Zm00001d042104	NA	glutathione S-transferase TAU 8	glutathione S-transferase TAU 8	N/A
902	OG0000040	Gh_D09G1521	Zm00001d042104	NA	glutathione S-transferase TAU 8	glutathione S-transferase TAU 8	N/A
903	OG0000041	Gh_A05G2514	Zm00001d032806	Zm00001d032806	Pectin lyase-like superfamily protein	Pectin lyase-like superfamily protein	Pectin lyase-like superfamily protein
904	OG0000041	Gh_A05G3634	Zm00001d004448	NA	Pectin lyase-like superfamily protein	Pectin lyase-like superfamily protein	N/A
905	OG0000041	Gh_A07G1458	Zm00001d004448	NA	Pectin lyase-like superfamily protein	Pectin lyase-like superfamily protein	N/A
906	OG0000041	Gh_A09G1803	Zm00001d004448	Zm00001d004448	Pectin lyase-like superfamily protein	Pectin lyase-like superfamily protein	Pectin lyase-like superfamily protein
907	OG0000041	Gh_A09G1803	Zm00001d025067	Zm00001d004448	Pectin lyase-like superfamily protein	Pectin lyase-like superfamily protein	Pectin lyase-like superfamily protein
908	OG0000041	Gh_A10G1075	Zm00001d004448	NA	Pectin lyase-like superfamily protein	Pectin lyase-like superfamily protein	N/A
909	OG0000041	Gh_A11G3082	Zm00001d004448	NA	Pectin lyase-like superfamily protein	Pectin lyase-like superfamily protein	N/A
910	OG0000041	Gh_D05G2792	Zm00001d032806	Zm00001d032806	Pectin lyase-like superfamily protein	Pectin lyase-like superfamily protein	Pectin lyase-like superfamily protein
911	OG0000041	Gh_D05G3049	Zm00001d004448	NA	Pectin lyase-like superfamily protein	Pectin lyase-like superfamily protein	N/A
912	OG0000041	Gh_D09G1925	Zm00001d004448	Zm00001d004448	Pectin lyase-like superfamily protein	Pectin lyase-like superfamily protein	Pectin lyase-like superfamily protein
913	OG0000041	Gh_D09G1925	Zm00001d025067	Zm00001d004448	Pectin lyase-like superfamily protein	Pectin lyase-like superfamily protein	Pectin lyase-like superfamily protein
914	OG0000041	Gh_D10G1437	Zm00001d004448	NA	Pectin lyase-like superfamily protein	Pectin lyase-like superfamily protein	N/A
915	OG0000041	Gh_D11G1400	Zm00001d004448	NA	Pectin lyase-like superfamily protein	Pectin lyase-like superfamily protein	N/A
916	OG0000048	Gh_A05G0988	Zm00001d034940	NA	pleiotropic drug resistance 11	pleiotropic drug resistance 11	N/A
917	OG0000048	Gh_A05G2479	Zm00001d034940	NA	pleiotropic drug resistance 6	pleiotropic drug resistance 11	N/A
918	OG0000048	Gh_A05G3418	Zm00001d034940	NA	pleiotropic drug resistance 6	pleiotropic drug resistance 11	N/A
919	OG0000048	Gh_A09G1286	Zm00001d034940	NA	pleiotropic drug resistance 6	pleiotropic drug resistance 11	N/A
920	OG0000048	Gh_D04G0172	Zm00001d034940	NA	pleiotropic drug resistance 6	pleiotropic drug resistance 11	N/A
921	OG0000048	Gh_D05G1099	Zm00001d034940	NA	pleiotropic drug resistance 11	pleiotropic drug resistance 11	N/A
922	OG0000048	Gh_D09G1331	Zm00001d034940	NA	pleiotropic drug resistance 11	pleiotropic drug resistance 11	N/A
923	OG0000049	Gh_A05G1932	Zm00001d016942	Zm00001d004248	UDP-glucosyl transferase 85A2	UDP-Glycosyltransferase superfamily protein	UDP-glucosyl transferase 85A2
924	OG0000049	Gh_A05G1932	Zm00001d003488	Zm00001d004248	UDP-glucosyl transferase 85A2	UDP-glucosyl transferase 85A2	UDP-glucosyl transferase 85A2
925	OG0000049	Gh_A05G1932	Zm00001d003483	Zm00001d004248	UDP-glucosyl transferase 85A2	UDP-glucosyl transferase 85A2	UDP-glucosyl transferase 85A2
926	OG0000049	Gh_A05G1932	Zm00001d004248	Zm00001d052209	UDP-glucosyl transferase 85A2	UDP-glucosyl transferase 85A2	UDP-glucosyl transferase 85A2
927	OG0000049	Gh_A05G1932	Zm00001d004248	Zm00001d004248	UDP-glucosyl transferase 85A2	UDP-glucosyl transferase 85A2	UDP-glucosyl transferase 85A2
928	OG0000049	Gh_A05G1932	Zm00001d004248	Zm00001d052210	UDP-glucosyl transferase 85A2	UDP-glucosyl transferase 85A2	UDP-Glycosyltransferase superfamily protein
929	OG0000049	Gh_A05G1932	Zm00001d004248	Zm00001d052211	UDP-glucosyl transferase 85A2	UDP-glucosyl transferase 85A2	UDP-glucosyl transferase 85A3
930	OG0000049	Gh_A05G1932	Zm00001d032222	Zm00001d052209	UDP-glucosyl transferase 85A2	UDP-glucosyl transferase 85A2	UDP-glucosyl transferase 85A2
931	OG0000049	Gh_A05G1932	Zm00001d032222	Zm00001d004248	UDP-glucosyl transferase 85A2	UDP-glucosyl transferase 85A2	UDP-glucosyl transferase 85A2
932	OG0000049	Gh_A05G1932	Zm00001d032222	Zm00001d052210	UDP-glucosyl transferase 85A2	UDP-glucosyl transferase 85A2	UDP-Glycosyltransferase superfamily protein
933	OG0000049	Gh_A05G1932	Zm00001d032222	Zm00001d052211	UDP-glucosyl transferase 85A2	UDP-glucosyl transferase 85A2	UDP-glucosyl transferase 85A3
934	OG0000049	Gh_A05G1932	Zm00001d021219	Zm00001d004248	UDP-glucosyl transferase 85A2	UDP-glucosyl transferase 85A2	UDP-glucosyl transferase 85A2
935	OG0000049	Gh_A05G1932	Zm00001d038512	Zm00001d004248	UDP-glucosyl transferase 85A2	UDP-glucosyl transferase 85A2	UDP-glucosyl transferase 85A2
936	OG0000049	Gh_A05G1932	Zm00001d016910	Zm00001d004248	UDP-glucosyl transferase 85A2	UDP-Glycosyltransferase superfamily protein	UDP-glucosyl transferase 85A2
937	OG0000049	Gh_A13G0600	Zm00001d016942	Zm00001d004248	UDP-glucosyl transferase 85A2	UDP-Glycosyltransferase superfamily protein	UDP-glucosyl transferase 85A2
938	OG0000049	Gh_A13G0600	Zm00001d003488	Zm00001d004248	UDP-glucosyl transferase 85A2	UDP-glucosyl transferase 85A2	UDP-glucosyl transferase 85A2
939	OG0000049	Gh_A13G0600	Zm00001d003483	Zm00001d004248	UDP-glucosyl transferase 85A2	UDP-glucosyl transferase 85A2	UDP-glucosyl transferase 85A2
940	OG0000049	Gh_A13G0600	Zm00001d004248	Zm00001d004248	UDP-glucosyl transferase 85A2	UDP-glucosyl transferase 85A2	UDP-glucosyl transferase 85A2
941	OG0000049	Gh_A13G0600	Zm00001d004248	Zm00001d052209	UDP-glucosyl transferase 85A2	UDP-glucosyl transferase 85A2	UDP-glucosyl transferase 85A2
942	OG0000049	Gh_A13G0600	Zm00001d004248	Zm00001d052210	UDP-glucosyl transferase 85A2	UDP-glucosyl transferase 85A2	UDP-Glycosyltransferase superfamily protein
943	OG0000049	Gh_A13G0600	Zm00001d004248	Zm00001d052211	UDP-glucosyl transferase 85A2	UDP-glucosyl transferase 85A2	UDP-glucosyl transferase 85A3
944	OG0000049	Gh_A13G0600	Zm00001d032222	Zm00001d004248	UDP-glucosyl transferase 85A2	UDP-glucosyl transferase 85A2	UDP-glucosyl transferase 85A2
945	OG0000049	Gh_A13G0600	Zm00001d032222	Zm00001d052209	UDP-glucosyl transferase 85A2	UDP-glucosyl transferase 85A2	UDP-glucosyl transferase 85A2
946	OG0000049	Gh_A13G0600	Zm00001d032222	Zm00001d052210	UDP-glucosyl transferase 85A2	UDP-glucosyl transferase 85A2	UDP-Glycosyltransferase superfamily protein
947	OG0000049	Gh_A13G0600	Zm00001d032222	Zm00001d052211	UDP-glucosyl transferase 85A2	UDP-glucosyl transferase 85A2	UDP-glucosyl transferase 85A3
948	OG0000049	Gh_A13G0600	Zm00001d021219	Zm00001d004248	UDP-glucosyl transferase 85A2	UDP-glucosyl transferase 85A2	UDP-glucosyl transferase 85A2
949	OG0000049	Gh_A13G0600	Zm00001d038512	Zm00001d004248	UDP-glucosyl transferase 85A2	UDP-glucosyl transferase 85A2	UDP-glucosyl transferase 85A2
950	OG0000049	Gh_A13G0600	Zm00001d016910	Zm00001d004248	UDP-glucosyl transferase 85A2	UDP-Glycosyltransferase superfamily protein	UDP-glucosyl transferase 85A2
951	OG0000049	Gh_A13G0605	Zm00001d016942	Zm00001d004248	UDP-glucosyl transferase 85A2	UDP-Glycosyltransferase superfamily protein	UDP-glucosyl transferase 85A2
952	OG0000049	Gh_A13G0605	Zm00001d003488	Zm00001d004248	UDP-glucosyl transferase 85A2	UDP-glucosyl transferase 85A2	UDP-glucosyl transferase 85A2
953	OG0000049	Gh_A13G0605	Zm00001d003483	Zm00001d004248	UDP-glucosyl transferase 85A2	UDP-glucosyl transferase 85A2	UDP-glucosyl transferase 85A2
954	OG0000049	Gh_A13G0605	Zm00001d004248	Zm00001d004248	UDP-glucosyl transferase 85A2	UDP-glucosyl transferase 85A2	UDP-glucosyl transferase 85A2
955	OG0000049	Gh_A13G0605	Zm00001d004248	Zm00001d052209	UDP-glucosyl transferase 85A2	UDP-glucosyl transferase 85A2	UDP-glucosyl transferase 85A2
956	OG0000049	Gh_A13G0605	Zm00001d004248	Zm00001d052210	UDP-glucosyl transferase 85A2	UDP-glucosyl transferase 85A2	UDP-Glycosyltransferase superfamily protein
957	OG0000049	Gh_A13G0605	Zm00001d004248	Zm00001d052211	UDP-glucosyl transferase 85A2	UDP-glucosyl transferase 85A2	UDP-glucosyl transferase 85A3
958	OG0000049	Gh_A13G0605	Zm00001d032222	Zm00001d004248	UDP-glucosyl transferase 85A2	UDP-glucosyl transferase 85A2	UDP-glucosyl transferase 85A2
959	OG0000049	Gh_A13G0605	Zm00001d032222	Zm00001d052209	UDP-glucosyl transferase 85A2	UDP-glucosyl transferase 85A2	UDP-glucosyl transferase 85A2
960	OG0000049	Gh_A13G0605	Zm00001d032222	Zm00001d052210	UDP-glucosyl transferase 85A2	UDP-glucosyl transferase 85A2	UDP-Glycosyltransferase superfamily protein
961	OG0000049	Gh_A13G0605	Zm00001d032222	Zm00001d052211	UDP-glucosyl transferase 85A2	UDP-glucosyl transferase 85A2	UDP-glucosyl transferase 85A3
962	OG0000049	Gh_A13G0605	Zm00001d021219	Zm00001d004248	UDP-glucosyl transferase 85A2	UDP-glucosyl transferase 85A2	UDP-glucosyl transferase 85A2
963	OG0000049	Gh_A13G0605	Zm00001d038512	Zm00001d004248	UDP-glucosyl transferase 85A2	UDP-glucosyl transferase 85A2	UDP-glucosyl transferase 85A2
964	OG0000049	Gh_A13G0605	Zm00001d016910	Zm00001d004248	UDP-glucosyl transferase 85A2	UDP-Glycosyltransferase superfamily protein	UDP-glucosyl transferase 85A2
965	OG0000049	Gh_D05G2163	Zm00001d016942	Zm00001d004248	UDP-glucosyl transferase 85A2	UDP-Glycosyltransferase superfamily protein	UDP-glucosyl transferase 85A2
966	OG0000049	Gh_D05G2163	Zm00001d003488	Zm00001d004248	UDP-glucosyl transferase 85A2	UDP-glucosyl transferase 85A2	UDP-glucosyl transferase 85A2
967	OG0000049	Gh_D05G2163	Zm00001d003483	Zm00001d004248	UDP-glucosyl transferase 85A2	UDP-glucosyl transferase 85A2	UDP-glucosyl transferase 85A2
968	OG0000049	Gh_D05G2163	Zm00001d004248	Zm00001d052210	UDP-glucosyl transferase 85A2	UDP-glucosyl transferase 85A2	UDP-Glycosyltransferase superfamily protein
969	OG0000049	Gh_D05G2163	Zm00001d004248	Zm00001d004248	UDP-glucosyl transferase 85A2	UDP-glucosyl transferase 85A2	UDP-glucosyl transferase 85A2
970	OG0000049	Gh_D05G2163	Zm00001d004248	Zm00001d052209	UDP-glucosyl transferase 85A2	UDP-glucosyl transferase 85A2	UDP-glucosyl transferase 85A2
971	OG0000049	Gh_D05G2163	Zm00001d004248	Zm00001d052211	UDP-glucosyl transferase 85A2	UDP-glucosyl transferase 85A2	UDP-glucosyl transferase 85A3
972	OG0000049	Gh_D05G2163	Zm00001d032222	Zm00001d052210	UDP-glucosyl transferase 85A2	UDP-glucosyl transferase 85A2	UDP-Glycosyltransferase superfamily protein
973	OG0000049	Gh_D05G2163	Zm00001d032222	Zm00001d004248	UDP-glucosyl transferase 85A2	UDP-glucosyl transferase 85A2	UDP-glucosyl transferase 85A2
974	OG0000049	Gh_D05G2163	Zm00001d032222	Zm00001d052209	UDP-glucosyl transferase 85A2	UDP-glucosyl transferase 85A2	UDP-glucosyl transferase 85A2
975	OG0000049	Gh_D05G2163	Zm00001d032222	Zm00001d052211	UDP-glucosyl transferase 85A2	UDP-glucosyl transferase 85A2	UDP-glucosyl transferase 85A3
976	OG0000049	Gh_D05G2163	Zm00001d021219	Zm00001d004248	UDP-glucosyl transferase 85A2	UDP-glucosyl transferase 85A2	UDP-glucosyl transferase 85A2
977	OG0000049	Gh_D05G2163	Zm00001d038512	Zm00001d004248	UDP-glucosyl transferase 85A2	UDP-glucosyl transferase 85A2	UDP-glucosyl transferase 85A2
978	OG0000049	Gh_D05G2163	Zm00001d016910	Zm00001d004248	UDP-glucosyl transferase 85A2	UDP-Glycosyltransferase superfamily protein	UDP-glucosyl transferase 85A2
979	OG0000049	Gh_D13G0523	Zm00001d016942	Zm00001d004248	UDP-glucosyl transferase 85A2	UDP-Glycosyltransferase superfamily protein	UDP-glucosyl transferase 85A2
980	OG0000049	Gh_D13G0523	Zm00001d003488	Zm00001d004248	UDP-glucosyl transferase 85A2	UDP-glucosyl transferase 85A2	UDP-glucosyl transferase 85A2
981	OG0000049	Gh_D13G0523	Zm00001d003483	Zm00001d004248	UDP-glucosyl transferase 85A2	UDP-glucosyl transferase 85A2	UDP-glucosyl transferase 85A2
982	OG0000049	Gh_D13G0523	Zm00001d004248	Zm00001d052211	UDP-glucosyl transferase 85A2	UDP-glucosyl transferase 85A2	UDP-glucosyl transferase 85A3
983	OG0000049	Gh_D13G0523	Zm00001d004248	Zm00001d004248	UDP-glucosyl transferase 85A2	UDP-glucosyl transferase 85A2	UDP-glucosyl transferase 85A2
984	OG0000049	Gh_D13G0523	Zm00001d004248	Zm00001d052209	UDP-glucosyl transferase 85A2	UDP-glucosyl transferase 85A2	UDP-glucosyl transferase 85A2
985	OG0000049	Gh_D13G0523	Zm00001d004248	Zm00001d052210	UDP-glucosyl transferase 85A2	UDP-glucosyl transferase 85A2	UDP-Glycosyltransferase superfamily protein
986	OG0000049	Gh_D13G0523	Zm00001d032222	Zm00001d052211	UDP-glucosyl transferase 85A2	UDP-glucosyl transferase 85A2	UDP-glucosyl transferase 85A3
987	OG0000049	Gh_D13G0523	Zm00001d032222	Zm00001d004248	UDP-glucosyl transferase 85A2	UDP-glucosyl transferase 85A2	UDP-glucosyl transferase 85A2
988	OG0000049	Gh_D13G0523	Zm00001d032222	Zm00001d052209	UDP-glucosyl transferase 85A2	UDP-glucosyl transferase 85A2	UDP-glucosyl transferase 85A2
989	OG0000049	Gh_D13G0523	Zm00001d032222	Zm00001d052210	UDP-glucosyl transferase 85A2	UDP-glucosyl transferase 85A2	UDP-Glycosyltransferase superfamily protein
990	OG0000049	Gh_D13G0523	Zm00001d021219	Zm00001d004248	UDP-glucosyl transferase 85A2	UDP-glucosyl transferase 85A2	UDP-glucosyl transferase 85A2
991	OG0000049	Gh_D13G0523	Zm00001d038512	Zm00001d004248	UDP-glucosyl transferase 85A2	UDP-glucosyl transferase 85A2	UDP-glucosyl transferase 85A2
992	OG0000049	Gh_D13G0523	Zm00001d016910	Zm00001d004248	UDP-glucosyl transferase 85A2	UDP-Glycosyltransferase superfamily protein	UDP-glucosyl transferase 85A2
993	OG0000049	Gh_D13G0524	Zm00001d016942	Zm00001d004248	UDP-glucosyl transferase 85A2	UDP-Glycosyltransferase superfamily protein	UDP-glucosyl transferase 85A2
994	OG0000049	Gh_D13G0524	Zm00001d003488	Zm00001d004248	UDP-glucosyl transferase 85A2	UDP-glucosyl transferase 85A2	UDP-glucosyl transferase 85A2
995	OG0000049	Gh_D13G0524	Zm00001d003483	Zm00001d004248	UDP-glucosyl transferase 85A2	UDP-glucosyl transferase 85A2	UDP-glucosyl transferase 85A2
996	OG0000049	Gh_D13G0524	Zm00001d004248	Zm00001d004248	UDP-glucosyl transferase 85A2	UDP-glucosyl transferase 85A2	UDP-glucosyl transferase 85A2
997	OG0000049	Gh_D13G0524	Zm00001d004248	Zm00001d052209	UDP-glucosyl transferase 85A2	UDP-glucosyl transferase 85A2	UDP-glucosyl transferase 85A2
998	OG0000049	Gh_D13G0524	Zm00001d004248	Zm00001d052210	UDP-glucosyl transferase 85A2	UDP-glucosyl transferase 85A2	UDP-Glycosyltransferase superfamily protein
999	OG0000049	Gh_D13G0524	Zm00001d004248	Zm00001d052211	UDP-glucosyl transferase 85A2	UDP-glucosyl transferase 85A2	UDP-glucosyl transferase 85A3
1000	OG0000049	Gh_D13G0524	Zm00001d032222	Zm00001d004248	UDP-glucosyl transferase 85A2	UDP-glucosyl transferase 85A2	UDP-glucosyl transferase 85A2
1001	OG0000049	Gh_D13G0524	Zm00001d032222	Zm00001d052209	UDP-glucosyl transferase 85A2	UDP-glucosyl transferase 85A2	UDP-glucosyl transferase 85A2
1002	OG0000049	Gh_D13G0524	Zm00001d032222	Zm00001d052210	UDP-glucosyl transferase 85A2	UDP-glucosyl transferase 85A2	UDP-Glycosyltransferase superfamily protein
1003	OG0000049	Gh_D13G0524	Zm00001d032222	Zm00001d052211	UDP-glucosyl transferase 85A2	UDP-glucosyl transferase 85A2	UDP-glucosyl transferase 85A3
1004	OG0000049	Gh_D13G0524	Zm00001d021219	Zm00001d004248	UDP-glucosyl transferase 85A2	UDP-glucosyl transferase 85A2	UDP-glucosyl transferase 85A2
1005	OG0000049	Gh_D13G0524	Zm00001d038512	Zm00001d004248	UDP-glucosyl transferase 85A2	UDP-glucosyl transferase 85A2	UDP-glucosyl transferase 85A2
1006	OG0000049	Gh_D13G0524	Zm00001d016910	Zm00001d004248	UDP-glucosyl transferase 85A2	UDP-Glycosyltransferase superfamily protein	UDP-glucosyl transferase 85A2
1007	OG0000052	Gh_A02G0977	Zm00001d035084	NA	NAC (No Apical Meristem) domain transcriptional regulator superfamily protein	NAC (No Apical Meristem) domain transcriptional regulator superfamily protein	N/A
1008	OG0000052	Gh_A07G1226	Zm00001d035084	NA	NAC (No Apical Meristem) domain transcriptional regulator superfamily protein	NAC (No Apical Meristem) domain transcriptional regulator superfamily protein	N/A
1009	OG0000052	Gh_A08G0961	Zm00001d035084	NA	NAC (No Apical Meristem) domain transcriptional regulator superfamily protein	NAC (No Apical Meristem) domain transcriptional regulator superfamily protein	N/A
1010	OG0000052	Gh_A09G2371	Zm00001d035084	NA	NAC (No Apical Meristem) domain transcriptional regulator superfamily protein	NAC (No Apical Meristem) domain transcriptional regulator superfamily protein	N/A
1011	OG0000052	Gh_A11G0915	Zm00001d035084	NA	NAC (No Apical Meristem) domain transcriptional regulator superfamily protein	NAC (No Apical Meristem) domain transcriptional regulator superfamily protein	N/A
1012	OG0000052	Gh_A12G1049	Zm00001d035084	NA	NAC (No Apical Meristem) domain transcriptional regulator superfamily protein	NAC (No Apical Meristem) domain transcriptional regulator superfamily protein	N/A
1013	OG0000052	Gh_A12G2179	Zm00001d035084	NA	NAC (No Apical Meristem) domain transcriptional regulator superfamily protein	NAC (No Apical Meristem) domain transcriptional regulator superfamily protein	N/A
1014	OG0000052	Gh_D03G0775	Zm00001d035084	NA	NAC (No Apical Meristem) domain transcriptional regulator superfamily protein	NAC (No Apical Meristem) domain transcriptional regulator superfamily protein	N/A
1015	OG0000052	Gh_D07G1330	Zm00001d035084	NA	NAC (No Apical Meristem) domain transcriptional regulator superfamily protein	NAC (No Apical Meristem) domain transcriptional regulator superfamily protein	N/A
1016	OG0000052	Gh_D08G1172	Zm00001d035084	NA	NAC (No Apical Meristem) domain transcriptional regulator superfamily protein	NAC (No Apical Meristem) domain transcriptional regulator superfamily protein	N/A
1017	OG0000052	Gh_D08G2434	Zm00001d025483	NA	NAC domain containing protein 70	NAC domain containing protein 70	N/A
1018	OG0000052	Gh_D08G2434	Zm00001d003583	NA	NAC domain containing protein 70	NAC domain containing protein 70	N/A
1019	OG0000052	Gh_D09G1785	Zm00001d035084	NA	NAC (No Apical Meristem) domain transcriptional regulator superfamily protein	NAC (No Apical Meristem) domain transcriptional regulator superfamily protein	N/A
1020	OG0000052	Gh_D11G1062	Zm00001d035084	NA	NAC (No Apical Meristem) domain transcriptional regulator superfamily protein	NAC (No Apical Meristem) domain transcriptional regulator superfamily protein	N/A
1021	OG0000052	Gh_D12G1169	Zm00001d035084	NA	NAC (No Apical Meristem) domain transcriptional regulator superfamily protein	NAC (No Apical Meristem) domain transcriptional regulator superfamily protein	N/A
1022	OG0000052	Gh_D12G2359	Zm00001d035084	NA	NAC (No Apical Meristem) domain transcriptional regulator superfamily protein	NAC (No Apical Meristem) domain transcriptional regulator superfamily protein	N/A
1023	OG0000056	Gh_A11G0233	Zm00001d027290	Zm00001d017508	Bifunctional inhibitor/lipid-transfer protein/seed storage 2S albumin superfamily protein	Bifunctional inhibitor/lipid-transfer protein/seed storage 2S albumin superfamily protein	Bifunctional inhibitor/lipid-transfer protein/seed storage 2S albumin superfamily protein
1024	OG0000056	Gh_A11G0234	Zm00001d027290	Zm00001d017508	Bifunctional inhibitor/lipid-transfer protein/seed storage 2S albumin superfamily protein	Bifunctional inhibitor/lipid-transfer protein/seed storage 2S albumin superfamily protein	Bifunctional inhibitor/lipid-transfer protein/seed storage 2S albumin superfamily protein
1025	OG0000056	Gh_A11G0235	Zm00001d027290	Zm00001d017508	Bifunctional inhibitor/lipid-transfer protein/seed storage 2S albumin superfamily protein	Bifunctional inhibitor/lipid-transfer protein/seed storage 2S albumin superfamily protein	Bifunctional inhibitor/lipid-transfer protein/seed storage 2S albumin superfamily protein
1026	OG0000056	Gh_A11G0236	Zm00001d027290	Zm00001d027291	Bifunctional inhibitor/lipid-transfer protein/seed storage 2S albumin superfamily protein	Bifunctional inhibitor/lipid-transfer protein/seed storage 2S albumin superfamily protein	Bifunctional inhibitor/lipid-transfer protein/seed storage 2S albumin superfamily protein
1027	OG0000056	Gh_A11G0236	Zm00001d027290	Zm00001d029859	Bifunctional inhibitor/lipid-transfer protein/seed storage 2S albumin superfamily protein	Bifunctional inhibitor/lipid-transfer protein/seed storage 2S albumin superfamily protein	Bifunctional inhibitor/lipid-transfer protein/seed storage 2S albumin superfamily protein
1028	OG0000056	Gh_A11G0236	Zm00001d027290	Zm00001d051384	Bifunctional inhibitor/lipid-transfer protein/seed storage 2S albumin superfamily protein	Bifunctional inhibitor/lipid-transfer protein/seed storage 2S albumin superfamily protein	Bifunctional inhibitor/lipid-transfer protein/seed storage 2S albumin superfamily protein
1029	OG0000056	Gh_A11G0236	Zm00001d027290	Zm00001d017508	Bifunctional inhibitor/lipid-transfer protein/seed storage 2S albumin superfamily protein	Bifunctional inhibitor/lipid-transfer protein/seed storage 2S albumin superfamily protein	Bifunctional inhibitor/lipid-transfer protein/seed storage 2S albumin superfamily protein
1030	OG0000056	Gh_A11G0236	Zm00001d027290	Zm00001d017510	Bifunctional inhibitor/lipid-transfer protein/seed storage 2S albumin superfamily protein	Bifunctional inhibitor/lipid-transfer protein/seed storage 2S albumin superfamily protein	Bifunctional inhibitor/lipid-transfer protein/seed storage 2S albumin superfamily protein
1031	OG0000056	Gh_A11G0236	Zm00001d027290	Zm00001d035888	Bifunctional inhibitor/lipid-transfer protein/seed storage 2S albumin superfamily protein	Bifunctional inhibitor/lipid-transfer protein/seed storage 2S albumin superfamily protein	Bifunctional inhibitor/lipid-transfer protein/seed storage 2S albumin superfamily protein
1032	OG0000056	Gh_A11G0236	Zm00001d027290	Zm00001d047113	Bifunctional inhibitor/lipid-transfer protein/seed storage 2S albumin superfamily protein	Bifunctional inhibitor/lipid-transfer protein/seed storage 2S albumin superfamily protein	Bifunctional inhibitor/lipid-transfer protein/seed storage 2S albumin superfamily protein
1033	OG0000056	Gh_A11G0236	Zm00001d027290	Zm00001d047114	Bifunctional inhibitor/lipid-transfer protein/seed storage 2S albumin superfamily protein	Bifunctional inhibitor/lipid-transfer protein/seed storage 2S albumin superfamily protein	Bifunctional inhibitor/lipid-transfer protein/seed storage 2S albumin superfamily protein
1034	OG0000056	Gh_A11G0236	Zm00001d027290	Zm00001d047115	Bifunctional inhibitor/lipid-transfer protein/seed storage 2S albumin superfamily protein	Bifunctional inhibitor/lipid-transfer protein/seed storage 2S albumin superfamily protein	Bifunctional inhibitor/lipid-transfer protein/seed storage 2S albumin superfamily protein
1035	OG0000056	Gh_A11G0236	Zm00001d027290	Zm00001d047116	Bifunctional inhibitor/lipid-transfer protein/seed storage 2S albumin superfamily protein	Bifunctional inhibitor/lipid-transfer protein/seed storage 2S albumin superfamily protein	Bifunctional inhibitor/lipid-transfer protein/seed storage 2S albumin superfamily protein
1036	OG0000056	Gh_A11G0236	Zm00001d027290	Zm00001d047117	Bifunctional inhibitor/lipid-transfer protein/seed storage 2S albumin superfamily protein	Bifunctional inhibitor/lipid-transfer protein/seed storage 2S albumin superfamily protein	Bifunctional inhibitor/lipid-transfer protein/seed storage 2S albumin superfamily protein
1037	OG0000056	Gh_A11G0237	Zm00001d027290	Zm00001d027291	Bifunctional inhibitor/lipid-transfer protein/seed storage 2S albumin superfamily protein	Bifunctional inhibitor/lipid-transfer protein/seed storage 2S albumin superfamily protein	Bifunctional inhibitor/lipid-transfer protein/seed storage 2S albumin superfamily protein
1038	OG0000056	Gh_A11G0237	Zm00001d027290	Zm00001d029859	Bifunctional inhibitor/lipid-transfer protein/seed storage 2S albumin superfamily protein	Bifunctional inhibitor/lipid-transfer protein/seed storage 2S albumin superfamily protein	Bifunctional inhibitor/lipid-transfer protein/seed storage 2S albumin superfamily protein
1039	OG0000056	Gh_A11G0237	Zm00001d027290	Zm00001d051384	Bifunctional inhibitor/lipid-transfer protein/seed storage 2S albumin superfamily protein	Bifunctional inhibitor/lipid-transfer protein/seed storage 2S albumin superfamily protein	Bifunctional inhibitor/lipid-transfer protein/seed storage 2S albumin superfamily protein
1040	OG0000056	Gh_A11G0237	Zm00001d027290	Zm00001d017508	Bifunctional inhibitor/lipid-transfer protein/seed storage 2S albumin superfamily protein	Bifunctional inhibitor/lipid-transfer protein/seed storage 2S albumin superfamily protein	Bifunctional inhibitor/lipid-transfer protein/seed storage 2S albumin superfamily protein
1041	OG0000056	Gh_A11G0237	Zm00001d027290	Zm00001d017510	Bifunctional inhibitor/lipid-transfer protein/seed storage 2S albumin superfamily protein	Bifunctional inhibitor/lipid-transfer protein/seed storage 2S albumin superfamily protein	Bifunctional inhibitor/lipid-transfer protein/seed storage 2S albumin superfamily protein
1042	OG0000056	Gh_A11G0237	Zm00001d027290	Zm00001d035888	Bifunctional inhibitor/lipid-transfer protein/seed storage 2S albumin superfamily protein	Bifunctional inhibitor/lipid-transfer protein/seed storage 2S albumin superfamily protein	Bifunctional inhibitor/lipid-transfer protein/seed storage 2S albumin superfamily protein
1043	OG0000056	Gh_A11G0237	Zm00001d027290	Zm00001d047113	Bifunctional inhibitor/lipid-transfer protein/seed storage 2S albumin superfamily protein	Bifunctional inhibitor/lipid-transfer protein/seed storage 2S albumin superfamily protein	Bifunctional inhibitor/lipid-transfer protein/seed storage 2S albumin superfamily protein
1044	OG0000056	Gh_A11G0237	Zm00001d027290	Zm00001d047114	Bifunctional inhibitor/lipid-transfer protein/seed storage 2S albumin superfamily protein	Bifunctional inhibitor/lipid-transfer protein/seed storage 2S albumin superfamily protein	Bifunctional inhibitor/lipid-transfer protein/seed storage 2S albumin superfamily protein
1045	OG0000056	Gh_A11G0237	Zm00001d027290	Zm00001d047115	Bifunctional inhibitor/lipid-transfer protein/seed storage 2S albumin superfamily protein	Bifunctional inhibitor/lipid-transfer protein/seed storage 2S albumin superfamily protein	Bifunctional inhibitor/lipid-transfer protein/seed storage 2S albumin superfamily protein
1046	OG0000056	Gh_A11G0237	Zm00001d027290	Zm00001d047116	Bifunctional inhibitor/lipid-transfer protein/seed storage 2S albumin superfamily protein	Bifunctional inhibitor/lipid-transfer protein/seed storage 2S albumin superfamily protein	Bifunctional inhibitor/lipid-transfer protein/seed storage 2S albumin superfamily protein
1047	OG0000056	Gh_A11G0237	Zm00001d027290	Zm00001d047117	Bifunctional inhibitor/lipid-transfer protein/seed storage 2S albumin superfamily protein	Bifunctional inhibitor/lipid-transfer protein/seed storage 2S albumin superfamily protein	Bifunctional inhibitor/lipid-transfer protein/seed storage 2S albumin superfamily protein
1048	OG0000056	Gh_A11G0239	Zm00001d027290	Zm00001d027291	Bifunctional inhibitor/lipid-transfer protein/seed storage 2S albumin superfamily protein	Bifunctional inhibitor/lipid-transfer protein/seed storage 2S albumin superfamily protein	Bifunctional inhibitor/lipid-transfer protein/seed storage 2S albumin superfamily protein
1049	OG0000056	Gh_A11G0239	Zm00001d027290	Zm00001d029859	Bifunctional inhibitor/lipid-transfer protein/seed storage 2S albumin superfamily protein	Bifunctional inhibitor/lipid-transfer protein/seed storage 2S albumin superfamily protein	Bifunctional inhibitor/lipid-transfer protein/seed storage 2S albumin superfamily protein
1050	OG0000056	Gh_A11G0239	Zm00001d027290	Zm00001d051384	Bifunctional inhibitor/lipid-transfer protein/seed storage 2S albumin superfamily protein	Bifunctional inhibitor/lipid-transfer protein/seed storage 2S albumin superfamily protein	Bifunctional inhibitor/lipid-transfer protein/seed storage 2S albumin superfamily protein
1051	OG0000056	Gh_A11G0239	Zm00001d027290	Zm00001d017508	Bifunctional inhibitor/lipid-transfer protein/seed storage 2S albumin superfamily protein	Bifunctional inhibitor/lipid-transfer protein/seed storage 2S albumin superfamily protein	Bifunctional inhibitor/lipid-transfer protein/seed storage 2S albumin superfamily protein
1052	OG0000056	Gh_A11G0239	Zm00001d027290	Zm00001d017510	Bifunctional inhibitor/lipid-transfer protein/seed storage 2S albumin superfamily protein	Bifunctional inhibitor/lipid-transfer protein/seed storage 2S albumin superfamily protein	Bifunctional inhibitor/lipid-transfer protein/seed storage 2S albumin superfamily protein
1053	OG0000056	Gh_A11G0239	Zm00001d027290	Zm00001d035888	Bifunctional inhibitor/lipid-transfer protein/seed storage 2S albumin superfamily protein	Bifunctional inhibitor/lipid-transfer protein/seed storage 2S albumin superfamily protein	Bifunctional inhibitor/lipid-transfer protein/seed storage 2S albumin superfamily protein
1054	OG0000056	Gh_A11G0239	Zm00001d027290	Zm00001d047113	Bifunctional inhibitor/lipid-transfer protein/seed storage 2S albumin superfamily protein	Bifunctional inhibitor/lipid-transfer protein/seed storage 2S albumin superfamily protein	Bifunctional inhibitor/lipid-transfer protein/seed storage 2S albumin superfamily protein
1055	OG0000056	Gh_A11G0239	Zm00001d027290	Zm00001d047114	Bifunctional inhibitor/lipid-transfer protein/seed storage 2S albumin superfamily protein	Bifunctional inhibitor/lipid-transfer protein/seed storage 2S albumin superfamily protein	Bifunctional inhibitor/lipid-transfer protein/seed storage 2S albumin superfamily protein
1056	OG0000056	Gh_A11G0239	Zm00001d027290	Zm00001d047115	Bifunctional inhibitor/lipid-transfer protein/seed storage 2S albumin superfamily protein	Bifunctional inhibitor/lipid-transfer protein/seed storage 2S albumin superfamily protein	Bifunctional inhibitor/lipid-transfer protein/seed storage 2S albumin superfamily protein
1057	OG0000056	Gh_A11G0239	Zm00001d027290	Zm00001d047116	Bifunctional inhibitor/lipid-transfer protein/seed storage 2S albumin superfamily protein	Bifunctional inhibitor/lipid-transfer protein/seed storage 2S albumin superfamily protein	Bifunctional inhibitor/lipid-transfer protein/seed storage 2S albumin superfamily protein
1058	OG0000056	Gh_A11G0239	Zm00001d027290	Zm00001d047117	Bifunctional inhibitor/lipid-transfer protein/seed storage 2S albumin superfamily protein	Bifunctional inhibitor/lipid-transfer protein/seed storage 2S albumin superfamily protein	Bifunctional inhibitor/lipid-transfer protein/seed storage 2S albumin superfamily protein
1059	OG0000056	Gh_D08G1846	Zm00001d027290	Zm00001d017508	Bifunctional inhibitor/lipid-transfer protein/seed storage 2S albumin superfamily protein	Bifunctional inhibitor/lipid-transfer protein/seed storage 2S albumin superfamily protein	Bifunctional inhibitor/lipid-transfer protein/seed storage 2S albumin superfamily protein
1060	OG0000056	Gh_D11G0247	Zm00001d027290	Zm00001d017508	Bifunctional inhibitor/lipid-transfer protein/seed storage 2S albumin superfamily protein	Bifunctional inhibitor/lipid-transfer protein/seed storage 2S albumin superfamily protein	Bifunctional inhibitor/lipid-transfer protein/seed storage 2S albumin superfamily protein
1061	OG0000056	Gh_D11G0248	Zm00001d027290	Zm00001d017508	Bifunctional inhibitor/lipid-transfer protein/seed storage 2S albumin superfamily protein	Bifunctional inhibitor/lipid-transfer protein/seed storage 2S albumin superfamily protein	Bifunctional inhibitor/lipid-transfer protein/seed storage 2S albumin superfamily protein
1062	OG0000056	Gh_D11G0249	Zm00001d027290	Zm00001d017508	Bifunctional inhibitor/lipid-transfer protein/seed storage 2S albumin superfamily protein	Bifunctional inhibitor/lipid-transfer protein/seed storage 2S albumin superfamily protein	Bifunctional inhibitor/lipid-transfer protein/seed storage 2S albumin superfamily protein
1063	OG0000056	Gh_D11G0250	Zm00001d027290	Zm00001d017508	Bifunctional inhibitor/lipid-transfer protein/seed storage 2S albumin superfamily protein	Bifunctional inhibitor/lipid-transfer protein/seed storage 2S albumin superfamily protein	Bifunctional inhibitor/lipid-transfer protein/seed storage 2S albumin superfamily protein
1064	OG0000056	Gh_D11G0251	Zm00001d027290	Zm00001d017508	Bifunctional inhibitor/lipid-transfer protein/seed storage 2S albumin superfamily protein	Bifunctional inhibitor/lipid-transfer protein/seed storage 2S albumin superfamily protein	Bifunctional inhibitor/lipid-transfer protein/seed storage 2S albumin superfamily protein
1065	OG0000056	Gh_D11G0251	Zm00001d027290	Zm00001d027291	Bifunctional inhibitor/lipid-transfer protein/seed storage 2S albumin superfamily protein	Bifunctional inhibitor/lipid-transfer protein/seed storage 2S albumin superfamily protein	Bifunctional inhibitor/lipid-transfer protein/seed storage 2S albumin superfamily protein
1066	OG0000056	Gh_D11G0251	Zm00001d027290	Zm00001d029859	Bifunctional inhibitor/lipid-transfer protein/seed storage 2S albumin superfamily protein	Bifunctional inhibitor/lipid-transfer protein/seed storage 2S albumin superfamily protein	Bifunctional inhibitor/lipid-transfer protein/seed storage 2S albumin superfamily protein
1067	OG0000056	Gh_D11G0251	Zm00001d027290	Zm00001d051384	Bifunctional inhibitor/lipid-transfer protein/seed storage 2S albumin superfamily protein	Bifunctional inhibitor/lipid-transfer protein/seed storage 2S albumin superfamily protein	Bifunctional inhibitor/lipid-transfer protein/seed storage 2S albumin superfamily protein
1068	OG0000056	Gh_D11G0251	Zm00001d027290	Zm00001d017510	Bifunctional inhibitor/lipid-transfer protein/seed storage 2S albumin superfamily protein	Bifunctional inhibitor/lipid-transfer protein/seed storage 2S albumin superfamily protein	Bifunctional inhibitor/lipid-transfer protein/seed storage 2S albumin superfamily protein
1069	OG0000056	Gh_D11G0251	Zm00001d027290	Zm00001d035888	Bifunctional inhibitor/lipid-transfer protein/seed storage 2S albumin superfamily protein	Bifunctional inhibitor/lipid-transfer protein/seed storage 2S albumin superfamily protein	Bifunctional inhibitor/lipid-transfer protein/seed storage 2S albumin superfamily protein
1070	OG0000056	Gh_D11G0251	Zm00001d027290	Zm00001d047113	Bifunctional inhibitor/lipid-transfer protein/seed storage 2S albumin superfamily protein	Bifunctional inhibitor/lipid-transfer protein/seed storage 2S albumin superfamily protein	Bifunctional inhibitor/lipid-transfer protein/seed storage 2S albumin superfamily protein
1071	OG0000056	Gh_D11G0251	Zm00001d027290	Zm00001d047114	Bifunctional inhibitor/lipid-transfer protein/seed storage 2S albumin superfamily protein	Bifunctional inhibitor/lipid-transfer protein/seed storage 2S albumin superfamily protein	Bifunctional inhibitor/lipid-transfer protein/seed storage 2S albumin superfamily protein
1072	OG0000056	Gh_D11G0251	Zm00001d027290	Zm00001d047115	Bifunctional inhibitor/lipid-transfer protein/seed storage 2S albumin superfamily protein	Bifunctional inhibitor/lipid-transfer protein/seed storage 2S albumin superfamily protein	Bifunctional inhibitor/lipid-transfer protein/seed storage 2S albumin superfamily protein
1073	OG0000056	Gh_D11G0251	Zm00001d027290	Zm00001d047116	Bifunctional inhibitor/lipid-transfer protein/seed storage 2S albumin superfamily protein	Bifunctional inhibitor/lipid-transfer protein/seed storage 2S albumin superfamily protein	Bifunctional inhibitor/lipid-transfer protein/seed storage 2S albumin superfamily protein
1074	OG0000056	Gh_D11G0251	Zm00001d027290	Zm00001d047117	Bifunctional inhibitor/lipid-transfer protein/seed storage 2S albumin superfamily protein	Bifunctional inhibitor/lipid-transfer protein/seed storage 2S albumin superfamily protein	Bifunctional inhibitor/lipid-transfer protein/seed storage 2S albumin superfamily protein
1075	OG0000056	Gh_D11G0252	Zm00001d027290	Zm00001d027291	Bifunctional inhibitor/lipid-transfer protein/seed storage 2S albumin superfamily protein	Bifunctional inhibitor/lipid-transfer protein/seed storage 2S albumin superfamily protein	Bifunctional inhibitor/lipid-transfer protein/seed storage 2S albumin superfamily protein
1076	OG0000056	Gh_D11G0252	Zm00001d027290	Zm00001d029859	Bifunctional inhibitor/lipid-transfer protein/seed storage 2S albumin superfamily protein	Bifunctional inhibitor/lipid-transfer protein/seed storage 2S albumin superfamily protein	Bifunctional inhibitor/lipid-transfer protein/seed storage 2S albumin superfamily protein
1077	OG0000056	Gh_D11G0252	Zm00001d027290	Zm00001d051384	Bifunctional inhibitor/lipid-transfer protein/seed storage 2S albumin superfamily protein	Bifunctional inhibitor/lipid-transfer protein/seed storage 2S albumin superfamily protein	Bifunctional inhibitor/lipid-transfer protein/seed storage 2S albumin superfamily protein
1078	OG0000056	Gh_D11G0252	Zm00001d027290	Zm00001d017508	Bifunctional inhibitor/lipid-transfer protein/seed storage 2S albumin superfamily protein	Bifunctional inhibitor/lipid-transfer protein/seed storage 2S albumin superfamily protein	Bifunctional inhibitor/lipid-transfer protein/seed storage 2S albumin superfamily protein
1079	OG0000056	Gh_D11G0252	Zm00001d027290	Zm00001d017510	Bifunctional inhibitor/lipid-transfer protein/seed storage 2S albumin superfamily protein	Bifunctional inhibitor/lipid-transfer protein/seed storage 2S albumin superfamily protein	Bifunctional inhibitor/lipid-transfer protein/seed storage 2S albumin superfamily protein
1080	OG0000056	Gh_D11G0252	Zm00001d027290	Zm00001d035888	Bifunctional inhibitor/lipid-transfer protein/seed storage 2S albumin superfamily protein	Bifunctional inhibitor/lipid-transfer protein/seed storage 2S albumin superfamily protein	Bifunctional inhibitor/lipid-transfer protein/seed storage 2S albumin superfamily protein
1081	OG0000056	Gh_D11G0252	Zm00001d027290	Zm00001d047113	Bifunctional inhibitor/lipid-transfer protein/seed storage 2S albumin superfamily protein	Bifunctional inhibitor/lipid-transfer protein/seed storage 2S albumin superfamily protein	Bifunctional inhibitor/lipid-transfer protein/seed storage 2S albumin superfamily protein
1082	OG0000056	Gh_D11G0252	Zm00001d027290	Zm00001d047114	Bifunctional inhibitor/lipid-transfer protein/seed storage 2S albumin superfamily protein	Bifunctional inhibitor/lipid-transfer protein/seed storage 2S albumin superfamily protein	Bifunctional inhibitor/lipid-transfer protein/seed storage 2S albumin superfamily protein
1083	OG0000056	Gh_D11G0252	Zm00001d027290	Zm00001d047115	Bifunctional inhibitor/lipid-transfer protein/seed storage 2S albumin superfamily protein	Bifunctional inhibitor/lipid-transfer protein/seed storage 2S albumin superfamily protein	Bifunctional inhibitor/lipid-transfer protein/seed storage 2S albumin superfamily protein
1084	OG0000056	Gh_D11G0252	Zm00001d027290	Zm00001d047116	Bifunctional inhibitor/lipid-transfer protein/seed storage 2S albumin superfamily protein	Bifunctional inhibitor/lipid-transfer protein/seed storage 2S albumin superfamily protein	Bifunctional inhibitor/lipid-transfer protein/seed storage 2S albumin superfamily protein
1085	OG0000056	Gh_D11G0252	Zm00001d027290	Zm00001d047117	Bifunctional inhibitor/lipid-transfer protein/seed storage 2S albumin superfamily protein	Bifunctional inhibitor/lipid-transfer protein/seed storage 2S albumin superfamily protein	Bifunctional inhibitor/lipid-transfer protein/seed storage 2S albumin superfamily protein
1086	OG0000056	Gh_D11G0253	Zm00001d027290	Zm00001d017508	Bifunctional inhibitor/lipid-transfer protein/seed storage 2S albumin superfamily protein	Bifunctional inhibitor/lipid-transfer protein/seed storage 2S albumin superfamily protein	Bifunctional inhibitor/lipid-transfer protein/seed storage 2S albumin superfamily protein
1087	OG0000056	Gh_D11G0254	Zm00001d027290	Zm00001d027291	Bifunctional inhibitor/lipid-transfer protein/seed storage 2S albumin superfamily protein	Bifunctional inhibitor/lipid-transfer protein/seed storage 2S albumin superfamily protein	Bifunctional inhibitor/lipid-transfer protein/seed storage 2S albumin superfamily protein
1088	OG0000056	Gh_D11G0254	Zm00001d027290	Zm00001d029859	Bifunctional inhibitor/lipid-transfer protein/seed storage 2S albumin superfamily protein	Bifunctional inhibitor/lipid-transfer protein/seed storage 2S albumin superfamily protein	Bifunctional inhibitor/lipid-transfer protein/seed storage 2S albumin superfamily protein
1089	OG0000056	Gh_D11G0254	Zm00001d027290	Zm00001d051384	Bifunctional inhibitor/lipid-transfer protein/seed storage 2S albumin superfamily protein	Bifunctional inhibitor/lipid-transfer protein/seed storage 2S albumin superfamily protein	Bifunctional inhibitor/lipid-transfer protein/seed storage 2S albumin superfamily protein
1090	OG0000056	Gh_D11G0254	Zm00001d027290	Zm00001d017508	Bifunctional inhibitor/lipid-transfer protein/seed storage 2S albumin superfamily protein	Bifunctional inhibitor/lipid-transfer protein/seed storage 2S albumin superfamily protein	Bifunctional inhibitor/lipid-transfer protein/seed storage 2S albumin superfamily protein
1091	OG0000056	Gh_D11G0254	Zm00001d027290	Zm00001d017510	Bifunctional inhibitor/lipid-transfer protein/seed storage 2S albumin superfamily protein	Bifunctional inhibitor/lipid-transfer protein/seed storage 2S albumin superfamily protein	Bifunctional inhibitor/lipid-transfer protein/seed storage 2S albumin superfamily protein
1092	OG0000056	Gh_D11G0254	Zm00001d027290	Zm00001d035888	Bifunctional inhibitor/lipid-transfer protein/seed storage 2S albumin superfamily protein	Bifunctional inhibitor/lipid-transfer protein/seed storage 2S albumin superfamily protein	Bifunctional inhibitor/lipid-transfer protein/seed storage 2S albumin superfamily protein
1093	OG0000056	Gh_D11G0254	Zm00001d027290	Zm00001d047113	Bifunctional inhibitor/lipid-transfer protein/seed storage 2S albumin superfamily protein	Bifunctional inhibitor/lipid-transfer protein/seed storage 2S albumin superfamily protein	Bifunctional inhibitor/lipid-transfer protein/seed storage 2S albumin superfamily protein
1094	OG0000056	Gh_D11G0254	Zm00001d027290	Zm00001d047114	Bifunctional inhibitor/lipid-transfer protein/seed storage 2S albumin superfamily protein	Bifunctional inhibitor/lipid-transfer protein/seed storage 2S albumin superfamily protein	Bifunctional inhibitor/lipid-transfer protein/seed storage 2S albumin superfamily protein
1095	OG0000056	Gh_D11G0254	Zm00001d027290	Zm00001d047115	Bifunctional inhibitor/lipid-transfer protein/seed storage 2S albumin superfamily protein	Bifunctional inhibitor/lipid-transfer protein/seed storage 2S albumin superfamily protein	Bifunctional inhibitor/lipid-transfer protein/seed storage 2S albumin superfamily protein
1096	OG0000056	Gh_D11G0254	Zm00001d027290	Zm00001d047116	Bifunctional inhibitor/lipid-transfer protein/seed storage 2S albumin superfamily protein	Bifunctional inhibitor/lipid-transfer protein/seed storage 2S albumin superfamily protein	Bifunctional inhibitor/lipid-transfer protein/seed storage 2S albumin superfamily protein
1097	OG0000056	Gh_D11G0254	Zm00001d027290	Zm00001d047117	Bifunctional inhibitor/lipid-transfer protein/seed storage 2S albumin superfamily protein	Bifunctional inhibitor/lipid-transfer protein/seed storage 2S albumin superfamily protein	Bifunctional inhibitor/lipid-transfer protein/seed storage 2S albumin superfamily protein
1098	OG0000056	Gh_Sca005825G01	Zm00001d027290	Zm00001d017508	Bifunctional inhibitor/lipid-transfer protein/seed storage 2S albumin superfamily protein	Bifunctional inhibitor/lipid-transfer protein/seed storage 2S albumin superfamily protein	Bifunctional inhibitor/lipid-transfer protein/seed storage 2S albumin superfamily protein
1099	OG0000057	Gh_A04G0365	Zm00001d013261	Zm00001d049217	Cysteine proteinases superfamily protein	senescence-associated gene 12	Cysteine proteinases superfamily protein
1100	OG0000057	Gh_A04G0365	Zm00001d013261	Zm00001d049219	Cysteine proteinases superfamily protein	senescence-associated gene 12	Cysteine proteinases superfamily protein
1101	OG0000057	Gh_A04G0366	Zm00001d013261	NA	Cysteine proteinases superfamily protein	senescence-associated gene 12	N/A
1102	OG0000057	Gh_A04G0367	Zm00001d013261	Zm00001d049217	Cysteine proteinases superfamily protein	senescence-associated gene 12	Cysteine proteinases superfamily protein
1103	OG0000057	Gh_A04G0367	Zm00001d013261	Zm00001d049219	Cysteine proteinases superfamily protein	senescence-associated gene 12	Cysteine proteinases superfamily protein
1104	OG0000057	Gh_A04G0370	Zm00001d013261	NA	Cysteine proteinases superfamily protein	senescence-associated gene 12	N/A
1105	OG0000057	Gh_D05G3269	Zm00001d013261	Zm00001d049217	Cysteine proteinases superfamily protein	senescence-associated gene 12	Cysteine proteinases superfamily protein
1106	OG0000057	Gh_D05G3269	Zm00001d013261	Zm00001d049219	Cysteine proteinases superfamily protein	senescence-associated gene 12	Cysteine proteinases superfamily protein
1107	OG0000057	Gh_D05G3271	Zm00001d013261	Zm00001d049217	Cysteine proteinases superfamily protein	senescence-associated gene 12	Cysteine proteinases superfamily protein
1108	OG0000057	Gh_D05G3271	Zm00001d013261	Zm00001d049219	Cysteine proteinases superfamily protein	senescence-associated gene 12	Cysteine proteinases superfamily protein
1109	OG0000057	Gh_D05G3272	Zm00001d013261	Zm00001d049217	Cysteine proteinases superfamily protein	senescence-associated gene 12	Cysteine proteinases superfamily protein
1110	OG0000057	Gh_D05G3272	Zm00001d013261	Zm00001d049219	Cysteine proteinases superfamily protein	senescence-associated gene 12	Cysteine proteinases superfamily protein
1111	OG0000057	Gh_D05G3275	Zm00001d013261	Zm00001d049217	Cysteine proteinases superfamily protein	senescence-associated gene 12	Cysteine proteinases superfamily protein
1112	OG0000057	Gh_D05G3275	Zm00001d013261	Zm00001d049219	Cysteine proteinases superfamily protein	senescence-associated gene 12	Cysteine proteinases superfamily protein
1113	OG0000057	Gh_D05G3276	Zm00001d013261	Zm00001d049217	Cysteine proteinases superfamily protein	senescence-associated gene 12	Cysteine proteinases superfamily protein
1114	OG0000057	Gh_D05G3276	Zm00001d013261	Zm00001d049219	Cysteine proteinases superfamily protein	senescence-associated gene 12	Cysteine proteinases superfamily protein
1115	OG0000057	Gh_D05G3277	Zm00001d013261	Zm00001d049217	Cysteine proteinases superfamily protein	senescence-associated gene 12	Cysteine proteinases superfamily protein
1116	OG0000057	Gh_D05G3277	Zm00001d013261	Zm00001d049219	Cysteine proteinases superfamily protein	senescence-associated gene 12	Cysteine proteinases superfamily protein
1117	OG0000057	Gh_D05G3278	Zm00001d013261	Zm00001d049217	Cysteine proteinases superfamily protein	senescence-associated gene 12	Cysteine proteinases superfamily protein
1118	OG0000057	Gh_D05G3278	Zm00001d013261	Zm00001d049219	Cysteine proteinases superfamily protein	senescence-associated gene 12	Cysteine proteinases superfamily protein
1119	OG0000057	Gh_D05G3279	Zm00001d013261	Zm00001d049217	Cysteine proteinases superfamily protein	senescence-associated gene 12	Cysteine proteinases superfamily protein
1120	OG0000057	Gh_D05G3279	Zm00001d013261	Zm00001d049219	Cysteine proteinases superfamily protein	senescence-associated gene 12	Cysteine proteinases superfamily protein
1121	OG0000058	Gh_A03G0019	Zm00001d024537	Zm00001d049521	Predicted AT-hook DNA-binding family protein	Predicted AT-hook DNA-binding family protein	Predicted AT-hook DNA-binding family protein
1122	OG0000058	Gh_A03G0019	Zm00001d049521	Zm00001d026035	Predicted AT-hook DNA-binding family protein	Predicted AT-hook DNA-binding family protein	Predicted AT-hook DNA-binding family protein
1123	OG0000058	Gh_A03G0019	Zm00001d049521	Zm00001d002495	Predicted AT-hook DNA-binding family protein	Predicted AT-hook DNA-binding family protein	Predicted AT-hook DNA-binding family protein
1124	OG0000058	Gh_A03G0019	Zm00001d049521	Zm00001d049521	Predicted AT-hook DNA-binding family protein	Predicted AT-hook DNA-binding family protein	Predicted AT-hook DNA-binding family protein
1125	OG0000058	Gh_A08G1420	Zm00001d024537	Zm00001d049521	Predicted AT-hook DNA-binding family protein	Predicted AT-hook DNA-binding family protein	Predicted AT-hook DNA-binding family protein
1126	OG0000058	Gh_A08G1420	Zm00001d049521	Zm00001d026035	Predicted AT-hook DNA-binding family protein	Predicted AT-hook DNA-binding family protein	Predicted AT-hook DNA-binding family protein
1127	OG0000058	Gh_A08G1420	Zm00001d049521	Zm00001d002495	Predicted AT-hook DNA-binding family protein	Predicted AT-hook DNA-binding family protein	Predicted AT-hook DNA-binding family protein
1128	OG0000058	Gh_A08G1420	Zm00001d049521	Zm00001d049521	Predicted AT-hook DNA-binding family protein	Predicted AT-hook DNA-binding family protein	Predicted AT-hook DNA-binding family protein
1129	OG0000058	Gh_A09G2336	Zm00001d024537	Zm00001d049521	Predicted AT-hook DNA-binding family protein	Predicted AT-hook DNA-binding family protein	Predicted AT-hook DNA-binding family protein
1130	OG0000058	Gh_A09G2336	Zm00001d049521	Zm00001d002495	Predicted AT-hook DNA-binding family protein	Predicted AT-hook DNA-binding family protein	Predicted AT-hook DNA-binding family protein
1131	OG0000058	Gh_A09G2336	Zm00001d049521	Zm00001d026035	Predicted AT-hook DNA-binding family protein	Predicted AT-hook DNA-binding family protein	Predicted AT-hook DNA-binding family protein
1132	OG0000058	Gh_A09G2336	Zm00001d049521	Zm00001d049521	Predicted AT-hook DNA-binding family protein	Predicted AT-hook DNA-binding family protein	Predicted AT-hook DNA-binding family protein
1133	OG0000058	Gh_A09G2350	Zm00001d049521	NA	Predicted AT-hook DNA-binding family protein	Predicted AT-hook DNA-binding family protein	N/A
1134	OG0000058	Gh_A12G1899	Zm00001d024537	Zm00001d049521	Predicted AT-hook DNA-binding family protein	Predicted AT-hook DNA-binding family protein	Predicted AT-hook DNA-binding family protein
1135	OG0000058	Gh_A12G1899	Zm00001d049521	Zm00001d026035	Predicted AT-hook DNA-binding family protein	Predicted AT-hook DNA-binding family protein	Predicted AT-hook DNA-binding family protein
1136	OG0000058	Gh_A12G1899	Zm00001d049521	Zm00001d002495	Predicted AT-hook DNA-binding family protein	Predicted AT-hook DNA-binding family protein	Predicted AT-hook DNA-binding family protein
1137	OG0000058	Gh_A12G1899	Zm00001d049521	Zm00001d049521	Predicted AT-hook DNA-binding family protein	Predicted AT-hook DNA-binding family protein	Predicted AT-hook DNA-binding family protein
1138	OG0000058	Gh_D03G1633	Zm00001d024537	Zm00001d049521	Predicted AT-hook DNA-binding family protein	Predicted AT-hook DNA-binding family protein	Predicted AT-hook DNA-binding family protein
1139	OG0000058	Gh_D03G1633	Zm00001d049521	Zm00001d026035	Predicted AT-hook DNA-binding family protein	Predicted AT-hook DNA-binding family protein	Predicted AT-hook DNA-binding family protein
1140	OG0000058	Gh_D03G1633	Zm00001d049521	Zm00001d002495	Predicted AT-hook DNA-binding family protein	Predicted AT-hook DNA-binding family protein	Predicted AT-hook DNA-binding family protein
1141	OG0000058	Gh_D03G1633	Zm00001d049521	Zm00001d049521	Predicted AT-hook DNA-binding family protein	Predicted AT-hook DNA-binding family protein	Predicted AT-hook DNA-binding family protein
1142	OG0000058	Gh_D08G1712	Zm00001d024537	Zm00001d049521	Predicted AT-hook DNA-binding family protein	Predicted AT-hook DNA-binding family protein	Predicted AT-hook DNA-binding family protein
1143	OG0000058	Gh_D08G1712	Zm00001d049521	Zm00001d049521	Predicted AT-hook DNA-binding family protein	Predicted AT-hook DNA-binding family protein	Predicted AT-hook DNA-binding family protein
1144	OG0000058	Gh_D08G1712	Zm00001d049521	Zm00001d026035	Predicted AT-hook DNA-binding family protein	Predicted AT-hook DNA-binding family protein	Predicted AT-hook DNA-binding family protein
1145	OG0000058	Gh_D08G1712	Zm00001d049521	Zm00001d002495	Predicted AT-hook DNA-binding family protein	Predicted AT-hook DNA-binding family protein	Predicted AT-hook DNA-binding family protein
1146	OG0000058	Gh_D09G1891	Zm00001d024537	Zm00001d049521	Predicted AT-hook DNA-binding family protein	Predicted AT-hook DNA-binding family protein	Predicted AT-hook DNA-binding family protein
1147	OG0000058	Gh_D09G1891	Zm00001d049521	Zm00001d026035	Predicted AT-hook DNA-binding family protein	Predicted AT-hook DNA-binding family protein	Predicted AT-hook DNA-binding family protein
1148	OG0000058	Gh_D09G1891	Zm00001d049521	Zm00001d002495	Predicted AT-hook DNA-binding family protein	Predicted AT-hook DNA-binding family protein	Predicted AT-hook DNA-binding family protein
1149	OG0000058	Gh_D09G1891	Zm00001d049521	Zm00001d049521	Predicted AT-hook DNA-binding family protein	Predicted AT-hook DNA-binding family protein	Predicted AT-hook DNA-binding family protein
1150	OG0000058	Gh_D12G2080	Zm00001d024537	Zm00001d049521	Predicted AT-hook DNA-binding family protein	Predicted AT-hook DNA-binding family protein	Predicted AT-hook DNA-binding family protein
1151	OG0000058	Gh_D12G2080	Zm00001d049521	Zm00001d026035	Predicted AT-hook DNA-binding family protein	Predicted AT-hook DNA-binding family protein	Predicted AT-hook DNA-binding family protein
1152	OG0000058	Gh_D12G2080	Zm00001d049521	Zm00001d002495	Predicted AT-hook DNA-binding family protein	Predicted AT-hook DNA-binding family protein	Predicted AT-hook DNA-binding family protein
1153	OG0000058	Gh_D12G2080	Zm00001d049521	Zm00001d049521	Predicted AT-hook DNA-binding family protein	Predicted AT-hook DNA-binding family protein	Predicted AT-hook DNA-binding family protein
1154	OG0000059	Gh_A05G3534	Zm00001d018322	Zm00001d018322	CAP (Cysteine-rich secretory proteins, Antigen 5, and Pathogenesis-related 1 protein) superfamily protein	CAP (Cysteine-rich secretory proteins, Antigen 5, and Pathogenesis-related 1 protein) superfamily protein	CAP (Cysteine-rich secretory proteins, Antigen 5, and Pathogenesis-related 1 protein) superfamily protein
1155	OG0000059	Gh_A08G0770	Zm00001d018322	Zm00001d018322	CAP (Cysteine-rich secretory proteins, Antigen 5, and Pathogenesis-related 1 protein) superfamily protein	CAP (Cysteine-rich secretory proteins, Antigen 5, and Pathogenesis-related 1 protein) superfamily protein	CAP (Cysteine-rich secretory proteins, Antigen 5, and Pathogenesis-related 1 protein) superfamily protein
1156	OG0000059	Gh_A08G0771	Zm00001d018323	Zm00001d018323	CAP (Cysteine-rich secretory proteins, Antigen 5, and Pathogenesis-related 1 protein) superfamily protein	CAP (Cysteine-rich secretory proteins, Antigen 5, and Pathogenesis-related 1 protein) superfamily protein	CAP (Cysteine-rich secretory proteins, Antigen 5, and Pathogenesis-related 1 protein) superfamily protein
1157	OG0000059	Gh_D04G0073	Zm00001d018322	Zm00001d018322	CAP (Cysteine-rich secretory proteins, Antigen 5, and Pathogenesis-related 1 protein) superfamily protein	CAP (Cysteine-rich secretory proteins, Antigen 5, and Pathogenesis-related 1 protein) superfamily protein	CAP (Cysteine-rich secretory proteins, Antigen 5, and Pathogenesis-related 1 protein) superfamily protein
1158	OG0000059	Gh_D08G0916	Zm00001d018322	Zm00001d018322	CAP (Cysteine-rich secretory proteins, Antigen 5, and Pathogenesis-related 1 protein) superfamily protein	CAP (Cysteine-rich secretory proteins, Antigen 5, and Pathogenesis-related 1 protein) superfamily protein	CAP (Cysteine-rich secretory proteins, Antigen 5, and Pathogenesis-related 1 protein) superfamily protein
1159	OG0000059	Gh_D08G0917	Zm00001d018323	Zm00001d018323	CAP (Cysteine-rich secretory proteins, Antigen 5, and Pathogenesis-related 1 protein) superfamily protein	CAP (Cysteine-rich secretory proteins, Antigen 5, and Pathogenesis-related 1 protein) superfamily protein	CAP (Cysteine-rich secretory proteins, Antigen 5, and Pathogenesis-related 1 protein) superfamily protein
1160	OG0000063	Gh_A05G0579	Zm00001d038049	Zm00001d042143	Glycosyl hydrolase superfamily protein	Glycosyl hydrolase superfamily protein	Glycosyl hydrolase superfamily protein
1161	OG0000063	Gh_A05G0579	Zm00001d042140	Zm00001d042143	Glycosyl hydrolase superfamily protein	Glycosyl hydrolase superfamily protein	Glycosyl hydrolase superfamily protein
1162	OG0000063	Gh_A05G1996	Zm00001d038577	NA	Glycosyl hydrolase superfamily protein	beta-1,3-glucanase 2	N/A
1163	OG0000063	Gh_A06G0035	Zm00001d038049	Zm00001d042141	beta-1,3-glucanase 3	Glycosyl hydrolase superfamily protein	beta-1,3-glucanase 2
1164	OG0000063	Gh_A06G0035	Zm00001d038049	Zm00001d038052	beta-1,3-glucanase 3	Glycosyl hydrolase superfamily protein	Glycosyl hydrolase superfamily protein
1165	OG0000063	Gh_A06G0035	Zm00001d042140	Zm00001d042141	beta-1,3-glucanase 3	Glycosyl hydrolase superfamily protein	beta-1,3-glucanase 2
1166	OG0000063	Gh_A06G0035	Zm00001d042140	Zm00001d038052	beta-1,3-glucanase 3	Glycosyl hydrolase superfamily protein	Glycosyl hydrolase superfamily protein
1167	OG0000063	Gh_A06G0036	Zm00001d038049	Zm00001d042141	beta-1,3-glucanase 3	Glycosyl hydrolase superfamily protein	beta-1,3-glucanase 2
1168	OG0000063	Gh_A06G0036	Zm00001d038049	Zm00001d038052	beta-1,3-glucanase 3	Glycosyl hydrolase superfamily protein	Glycosyl hydrolase superfamily protein
1169	OG0000063	Gh_A06G0036	Zm00001d042140	Zm00001d042141	beta-1,3-glucanase 3	Glycosyl hydrolase superfamily protein	beta-1,3-glucanase 2
1170	OG0000063	Gh_A06G0036	Zm00001d042140	Zm00001d038052	beta-1,3-glucanase 3	Glycosyl hydrolase superfamily protein	Glycosyl hydrolase superfamily protein
1171	OG0000063	Gh_A06G0037	Zm00001d038049	Zm00001d042141	beta-1,3-glucanase 2	Glycosyl hydrolase superfamily protein	beta-1,3-glucanase 2
1172	OG0000063	Gh_A06G0037	Zm00001d038049	Zm00001d038052	beta-1,3-glucanase 2	Glycosyl hydrolase superfamily protein	Glycosyl hydrolase superfamily protein
1173	OG0000063	Gh_A06G0037	Zm00001d042140	Zm00001d042141	beta-1,3-glucanase 2	Glycosyl hydrolase superfamily protein	beta-1,3-glucanase 2
1174	OG0000063	Gh_A06G0037	Zm00001d042140	Zm00001d038052	beta-1,3-glucanase 2	Glycosyl hydrolase superfamily protein	Glycosyl hydrolase superfamily protein
1175	OG0000063	Gh_A09G0635	Zm00001d009876	NA	Glycosyl hydrolase superfamily protein	Glycosyl hydrolase superfamily protein	N/A
1176	OG0000063	Gh_A09G0635	Zm00001d038049	NA	Glycosyl hydrolase superfamily protein	Glycosyl hydrolase superfamily protein	N/A
1177	OG0000063	Gh_A09G0635	Zm00001d038052	NA	Glycosyl hydrolase superfamily protein	Glycosyl hydrolase superfamily protein	N/A
1178	OG0000063	Gh_A09G0635	Zm00001d042141	NA	Glycosyl hydrolase superfamily protein	beta-1,3-glucanase 2	N/A
1179	OG0000063	Gh_A09G0635	Zm00001d047845	NA	Glycosyl hydrolase superfamily protein	beta-1,3-glucanase 1	N/A
1180	OG0000063	Gh_A09G0635	Zm00001d042140	NA	Glycosyl hydrolase superfamily protein	Glycosyl hydrolase superfamily protein	N/A
1181	OG0000063	Gh_A09G0635	Zm00001d042138	NA	Glycosyl hydrolase superfamily protein	Glycosyl hydrolase superfamily protein	N/A
1182	OG0000063	Gh_A09G0635	Zm00001d011886	NA	Glycosyl hydrolase superfamily protein	beta-1,3-glucanase 2	N/A
1183	OG0000063	Gh_A09G0635	Zm00001d042143	NA	Glycosyl hydrolase superfamily protein	Glycosyl hydrolase superfamily protein	N/A
1184	OG0000063	Gh_A09G0635	Zm00001d053733	NA	Glycosyl hydrolase superfamily protein	Glycosyl hydrolase superfamily protein	N/A
1185	OG0000063	Gh_A09G0636	Zm00001d009876	Zm00001d042140	Glycosyl hydrolase superfamily protein	Glycosyl hydrolase superfamily protein	Glycosyl hydrolase superfamily protein
1186	OG0000063	Gh_A09G0636	Zm00001d038049	Zm00001d042140	Glycosyl hydrolase superfamily protein	Glycosyl hydrolase superfamily protein	Glycosyl hydrolase superfamily protein
1187	OG0000063	Gh_A09G0636	Zm00001d038049	Zm00001d053733	Glycosyl hydrolase superfamily protein	Glycosyl hydrolase superfamily protein	Glycosyl hydrolase superfamily protein
1188	OG0000063	Gh_A09G0636	Zm00001d038052	Zm00001d042140	Glycosyl hydrolase superfamily protein	Glycosyl hydrolase superfamily protein	Glycosyl hydrolase superfamily protein
1189	OG0000063	Gh_A09G0636	Zm00001d042141	Zm00001d042140	Glycosyl hydrolase superfamily protein	beta-1,3-glucanase 2	Glycosyl hydrolase superfamily protein
1190	OG0000063	Gh_A09G0636	Zm00001d047845	Zm00001d042140	Glycosyl hydrolase superfamily protein	beta-1,3-glucanase 1	Glycosyl hydrolase superfamily protein
1191	OG0000063	Gh_A09G0636	Zm00001d042140	Zm00001d042140	Glycosyl hydrolase superfamily protein	Glycosyl hydrolase superfamily protein	Glycosyl hydrolase superfamily protein
1192	OG0000063	Gh_A09G0636	Zm00001d042140	Zm00001d053733	Glycosyl hydrolase superfamily protein	Glycosyl hydrolase superfamily protein	Glycosyl hydrolase superfamily protein
1193	OG0000063	Gh_A09G0636	Zm00001d042138	Zm00001d042140	Glycosyl hydrolase superfamily protein	Glycosyl hydrolase superfamily protein	Glycosyl hydrolase superfamily protein
1194	OG0000063	Gh_A09G0636	Zm00001d011886	Zm00001d042140	Glycosyl hydrolase superfamily protein	beta-1,3-glucanase 2	Glycosyl hydrolase superfamily protein
1195	OG0000063	Gh_A09G0636	Zm00001d042143	Zm00001d042140	Glycosyl hydrolase superfamily protein	Glycosyl hydrolase superfamily protein	Glycosyl hydrolase superfamily protein
1196	OG0000063	Gh_A09G0636	Zm00001d053733	Zm00001d042140	Glycosyl hydrolase superfamily protein	Glycosyl hydrolase superfamily protein	Glycosyl hydrolase superfamily protein
1197	OG0000063	Gh_A09G1126	Zm00001d038049	Zm00001d011886	beta-1,3-glucanase 3	Glycosyl hydrolase superfamily protein	beta-1,3-glucanase 2
1198	OG0000063	Gh_A09G1126	Zm00001d042140	Zm00001d011886	beta-1,3-glucanase 3	Glycosyl hydrolase superfamily protein	beta-1,3-glucanase 2
1199	OG0000063	Gh_A09G1127	Zm00001d038049	NA	beta-1,3-glucanase 1	Glycosyl hydrolase superfamily protein	N/A
1200	OG0000063	Gh_A09G1127	Zm00001d042140	NA	beta-1,3-glucanase 1	Glycosyl hydrolase superfamily protein	N/A
1201	OG0000063	Gh_D05G0709	Zm00001d038049	Zm00001d042143	Glycosyl hydrolase superfamily protein	Glycosyl hydrolase superfamily protein	Glycosyl hydrolase superfamily protein
1202	OG0000063	Gh_D05G0709	Zm00001d042140	Zm00001d042143	Glycosyl hydrolase superfamily protein	Glycosyl hydrolase superfamily protein	Glycosyl hydrolase superfamily protein
1203	OG0000063	Gh_D05G3800	Zm00001d038577	NA	Glycosyl hydrolase superfamily protein	beta-1,3-glucanase 2	N/A
1204	OG0000063	Gh_D06G2277	Zm00001d038049	Zm00001d042141	beta-1,3-glucanase 3	Glycosyl hydrolase superfamily protein	beta-1,3-glucanase 2
1205	OG0000063	Gh_D06G2277	Zm00001d038049	Zm00001d038052	beta-1,3-glucanase 3	Glycosyl hydrolase superfamily protein	Glycosyl hydrolase superfamily protein
1206	OG0000063	Gh_D06G2277	Zm00001d042140	Zm00001d042141	beta-1,3-glucanase 3	Glycosyl hydrolase superfamily protein	beta-1,3-glucanase 2
1207	OG0000063	Gh_D06G2277	Zm00001d042140	Zm00001d038052	beta-1,3-glucanase 3	Glycosyl hydrolase superfamily protein	Glycosyl hydrolase superfamily protein
1208	OG0000063	Gh_D06G2278	Zm00001d038049	Zm00001d038052	beta-1,3-glucanase 3	Glycosyl hydrolase superfamily protein	Glycosyl hydrolase superfamily protein
1209	OG0000063	Gh_D06G2278	Zm00001d038049	Zm00001d042141	beta-1,3-glucanase 3	Glycosyl hydrolase superfamily protein	beta-1,3-glucanase 2
1210	OG0000063	Gh_D06G2278	Zm00001d042140	Zm00001d038052	beta-1,3-glucanase 3	Glycosyl hydrolase superfamily protein	Glycosyl hydrolase superfamily protein
1211	OG0000063	Gh_D06G2278	Zm00001d042140	Zm00001d042141	beta-1,3-glucanase 3	Glycosyl hydrolase superfamily protein	beta-1,3-glucanase 2
1212	OG0000063	Gh_D09G0636	Zm00001d038049	NA	Glycosyl hydrolase superfamily protein	Glycosyl hydrolase superfamily protein	N/A
1213	OG0000063	Gh_D09G0636	Zm00001d042140	NA	Glycosyl hydrolase superfamily protein	Glycosyl hydrolase superfamily protein	N/A
1214	OG0000063	Gh_D09G0637	Zm00001d009876	Zm00001d042140	Glycosyl hydrolase superfamily protein	Glycosyl hydrolase superfamily protein	Glycosyl hydrolase superfamily protein
1215	OG0000063	Gh_D09G0637	Zm00001d038049	Zm00001d042140	Glycosyl hydrolase superfamily protein	Glycosyl hydrolase superfamily protein	Glycosyl hydrolase superfamily protein
1216	OG0000063	Gh_D09G0637	Zm00001d038049	Zm00001d053733	Glycosyl hydrolase superfamily protein	Glycosyl hydrolase superfamily protein	Glycosyl hydrolase superfamily protein
1217	OG0000063	Gh_D09G0637	Zm00001d038052	Zm00001d042140	Glycosyl hydrolase superfamily protein	Glycosyl hydrolase superfamily protein	Glycosyl hydrolase superfamily protein
1218	OG0000063	Gh_D09G0637	Zm00001d042141	Zm00001d042140	Glycosyl hydrolase superfamily protein	beta-1,3-glucanase 2	Glycosyl hydrolase superfamily protein
1219	OG0000063	Gh_D09G0637	Zm00001d047845	Zm00001d042140	Glycosyl hydrolase superfamily protein	beta-1,3-glucanase 1	Glycosyl hydrolase superfamily protein
1220	OG0000063	Gh_D09G0637	Zm00001d042140	Zm00001d042140	Glycosyl hydrolase superfamily protein	Glycosyl hydrolase superfamily protein	Glycosyl hydrolase superfamily protein
1221	OG0000063	Gh_D09G0637	Zm00001d042140	Zm00001d053733	Glycosyl hydrolase superfamily protein	Glycosyl hydrolase superfamily protein	Glycosyl hydrolase superfamily protein
1222	OG0000063	Gh_D09G0637	Zm00001d042138	Zm00001d042140	Glycosyl hydrolase superfamily protein	Glycosyl hydrolase superfamily protein	Glycosyl hydrolase superfamily protein
1223	OG0000063	Gh_D09G0637	Zm00001d011886	Zm00001d042140	Glycosyl hydrolase superfamily protein	beta-1,3-glucanase 2	Glycosyl hydrolase superfamily protein
1224	OG0000063	Gh_D09G0637	Zm00001d042143	Zm00001d042140	Glycosyl hydrolase superfamily protein	Glycosyl hydrolase superfamily protein	Glycosyl hydrolase superfamily protein
1225	OG0000063	Gh_D09G0637	Zm00001d053733	Zm00001d042140	Glycosyl hydrolase superfamily protein	Glycosyl hydrolase superfamily protein	Glycosyl hydrolase superfamily protein
1226	OG0000063	Gh_D09G1130	Zm00001d038049	NA	beta-1,3-glucanase 3	Glycosyl hydrolase superfamily protein	N/A
1227	OG0000063	Gh_D09G1130	Zm00001d042140	NA	beta-1,3-glucanase 3	Glycosyl hydrolase superfamily protein	N/A
1228	OG0000063	Gh_D09G1131	Zm00001d038049	NA	beta-1,3-glucanase 1	Glycosyl hydrolase superfamily protein	N/A
1229	OG0000063	Gh_D09G1131	Zm00001d042140	NA	beta-1,3-glucanase 1	Glycosyl hydrolase superfamily protein	N/A
1230	OG0000063	Gh_Sca008361G02	Zm00001d038577	NA	Glycosyl hydrolase superfamily protein	beta-1,3-glucanase 2	N/A
1231	OG0000064	Gh_A05G0783	Zm00001d048723	NA	NAD(P)-binding Rossmann-fold superfamily protein	NAD(P)-binding Rossmann-fold superfamily protein	N/A
1232	OG0000064	Gh_A05G0783	Zm00001d007687	NA	NAD(P)-binding Rossmann-fold superfamily protein	NAD(P)-binding Rossmann-fold superfamily protein	N/A
1233	OG0000064	Gh_A05G0783	Zm00001d048726	NA	NAD(P)-binding Rossmann-fold superfamily protein	NAD(P)-binding Rossmann-fold superfamily protein	N/A
1234	OG0000064	Gh_A05G0783	Zm00001d011930	NA	NAD(P)-binding Rossmann-fold superfamily protein	NAD(P)-binding Rossmann-fold superfamily protein	N/A
1235	OG0000065	Gh_A11G1708	Zm00001d007848	NA	roline-rich extensin-like receptor kinase 4	roline-rich extensin-like receptor kinase 4	N/A
1236	OG0000065	Gh_A11G1708	Zm00001d034257	NA	roline-rich extensin-like receptor kinase 4	Protein kinase superfamily protein	N/A
1237	OG0000065	Gh_D06G1000	Zm00001d043480	NA	Protein kinase superfamily protein	proline extensin-like receptor kinase 1	N/A
1238	OG0000066	Gh_A05G3364	Zm00001d051936	NA	phloem protein 2-B2	F-box family protein	N/A
1239	OG0000066	Gh_A05G3365	Zm00001d051936	NA	phloem protein 2-B10	F-box family protein	N/A
1240	OG0000066	Gh_A05G3370	Zm00001d051936	NA	phloem protein 2-B2	F-box family protein	N/A
1241	OG0000066	Gh_A08G1983	Zm00001d051936	Zm00001d051936	phloem protein 2-B1	F-box family protein	F-box family protein
1242	OG0000066	Gh_A08G1983	Zm00001d051936	Zm00001d053172	phloem protein 2-B1	F-box family protein	phloem protein 2-B2
1243	OG0000066	Gh_A08G1983	Zm00001d051936	Zm00001d018451	phloem protein 2-B1	F-box family protein	phloem protein 2-B12
1244	OG0000066	Gh_A08G1983	Zm00001d051936	Zm00001d018452	phloem protein 2-B1	F-box family protein	phloem protein 2-B1
1245	OG0000066	Gh_A08G1983	Zm00001d018451	Zm00001d051936	phloem protein 2-B1	phloem protein 2-B12	F-box family protein
1246	OG0000066	Gh_A09G1812	Zm00001d051936	Zm00001d051936	phloem protein 2-B12	F-box family protein	F-box family protein
1247	OG0000066	Gh_A09G1812	Zm00001d051936	Zm00001d053172	phloem protein 2-B12	F-box family protein	phloem protein 2-B2
1248	OG0000066	Gh_A09G1812	Zm00001d051936	Zm00001d018451	phloem protein 2-B12	F-box family protein	phloem protein 2-B12
1249	OG0000066	Gh_A09G1812	Zm00001d051936	Zm00001d018452	phloem protein 2-B12	F-box family protein	phloem protein 2-B1
1250	OG0000066	Gh_A09G1812	Zm00001d018451	Zm00001d051936	phloem protein 2-B12	phloem protein 2-B12	F-box family protein
1251	OG0000066	Gh_A09G1813	Zm00001d051936	NA	phloem protein 2-B12	F-box family protein	N/A
1252	OG0000066	Gh_A09G1814	Zm00001d051936	Zm00001d051936	phloem protein 2-B1	F-box family protein	F-box family protein
1253	OG0000066	Gh_A09G1814	Zm00001d051936	Zm00001d053172	phloem protein 2-B1	F-box family protein	phloem protein 2-B2
1254	OG0000066	Gh_A09G1814	Zm00001d051936	Zm00001d018451	phloem protein 2-B1	F-box family protein	phloem protein 2-B12
1255	OG0000066	Gh_A09G1814	Zm00001d051936	Zm00001d018452	phloem protein 2-B1	F-box family protein	phloem protein 2-B1
1256	OG0000066	Gh_A09G1814	Zm00001d018451	Zm00001d051936	phloem protein 2-B1	phloem protein 2-B12	F-box family protein
1257	OG0000066	Gh_A09G1815	Zm00001d051936	NA	phloem protein 2-B2	F-box family protein	N/A
1258	OG0000066	Gh_A09G2493	Zm00001d051936	Zm00001d051936	phloem protein 2-B11	F-box family protein	F-box family protein
1259	OG0000066	Gh_A09G2493	Zm00001d051936	Zm00001d053172	phloem protein 2-B11	F-box family protein	phloem protein 2-B2
1260	OG0000066	Gh_A09G2493	Zm00001d051936	Zm00001d018451	phloem protein 2-B11	F-box family protein	phloem protein 2-B12
1261	OG0000066	Gh_A09G2493	Zm00001d051936	Zm00001d018452	phloem protein 2-B11	F-box family protein	phloem protein 2-B1
1262	OG0000066	Gh_A09G2493	Zm00001d018451	Zm00001d051936	phloem protein 2-B11	phloem protein 2-B12	F-box family protein
1263	OG0000066	Gh_A10G1087	Zm00001d051936	NA	F-box family protein	F-box family protein	N/A
1264	OG0000066	Gh_A11G2455	Zm00001d051936	NA	phloem protein 2-B15	F-box family protein	N/A
1265	OG0000066	Gh_A11G2456	Zm00001d051936	NA	phloem protein 2-B15	F-box family protein	N/A
1266	OG0000066	Gh_D04G0264	Zm00001d051936	Zm00001d051936	phloem protein 2-B1	F-box family protein	F-box family protein
1267	OG0000066	Gh_D04G0264	Zm00001d051936	Zm00001d053172	phloem protein 2-B1	F-box family protein	phloem protein 2-B2
1268	OG0000066	Gh_D04G0264	Zm00001d051936	Zm00001d018451	phloem protein 2-B1	F-box family protein	phloem protein 2-B12
1269	OG0000066	Gh_D04G0264	Zm00001d051936	Zm00001d018452	phloem protein 2-B1	F-box family protein	phloem protein 2-B1
1270	OG0000066	Gh_D04G0264	Zm00001d018451	Zm00001d051936	phloem protein 2-B1	phloem protein 2-B12	F-box family protein
1271	OG0000066	Gh_D08G2377	Zm00001d051936	Zm00001d051936	phloem protein 2-B1	F-box family protein	F-box family protein
1272	OG0000066	Gh_D08G2377	Zm00001d051936	Zm00001d053172	phloem protein 2-B1	F-box family protein	phloem protein 2-B2
1273	OG0000066	Gh_D08G2377	Zm00001d051936	Zm00001d018451	phloem protein 2-B1	F-box family protein	phloem protein 2-B12
1274	OG0000066	Gh_D08G2377	Zm00001d051936	Zm00001d018452	phloem protein 2-B1	F-box family protein	phloem protein 2-B1
1275	OG0000066	Gh_D08G2377	Zm00001d018451	Zm00001d051936	phloem protein 2-B1	phloem protein 2-B12	F-box family protein
1276	OG0000066	Gh_D09G1934	Zm00001d051936	NA	phloem protein 2-B11	F-box family protein	N/A
1277	OG0000066	Gh_D09G1935	Zm00001d051936	NA	phloem protein 2-B12	F-box family protein	N/A
1278	OG0000066	Gh_D09G1936	Zm00001d051936	NA	phloem protein 2-B12	F-box family protein	N/A
1279	OG0000066	Gh_D09G2476	Zm00001d051936	Zm00001d051936	phloem protein 2-B11	F-box family protein	F-box family protein
1280	OG0000066	Gh_D09G2476	Zm00001d051936	Zm00001d053172	phloem protein 2-B11	F-box family protein	phloem protein 2-B2
1281	OG0000066	Gh_D09G2476	Zm00001d051936	Zm00001d018451	phloem protein 2-B11	F-box family protein	phloem protein 2-B12
1282	OG0000066	Gh_D09G2476	Zm00001d051936	Zm00001d018452	phloem protein 2-B11	F-box family protein	phloem protein 2-B1
1283	OG0000066	Gh_D09G2476	Zm00001d018451	Zm00001d051936	phloem protein 2-B11	phloem protein 2-B12	F-box family protein
1284	OG0000066	Gh_D10G1423	Zm00001d051936	Zm00001d051936	phloem protein 2-B12	F-box family protein	F-box family protein
1285	OG0000066	Gh_D10G1423	Zm00001d051936	Zm00001d053172	phloem protein 2-B12	F-box family protein	phloem protein 2-B2
1286	OG0000066	Gh_D10G1423	Zm00001d051936	Zm00001d018451	phloem protein 2-B12	F-box family protein	phloem protein 2-B12
1287	OG0000066	Gh_D10G1423	Zm00001d051936	Zm00001d018452	phloem protein 2-B12	F-box family protein	phloem protein 2-B1
1288	OG0000066	Gh_D10G1423	Zm00001d018451	Zm00001d051936	phloem protein 2-B12	phloem protein 2-B12	F-box family protein
1289	OG0000066	Gh_D11G2772	Zm00001d051936	NA	phloem protein 2-B15	F-box family protein	N/A
1290	OG0000066	Gh_D11G2773	Zm00001d051936	NA	phloem protein 2-B15	F-box family protein	N/A
1291	OG0000066	Gh_D13G1152	Zm00001d051936	NA	phloem protein 2-B15	F-box family protein	N/A
1292	OG0000066	Gh_Sca007264G01	Zm00001d051936	NA	phloem protein 2-B15	F-box family protein	N/A
1293	OG0000068	Gh_A08G0945	Zm00001d010159	Zm00001d013873	actin 7	actin 7	actin 7
1294	OG0000068	Gh_A08G0945	Zm00001d010159	Zm00001d032480	actin 7	actin 7	actin 7
1295	OG0000068	Gh_A08G0945	Zm00001d042731	Zm00001d013873	actin 7	actin 7	actin 7
1296	OG0000068	Gh_A08G0945	Zm00001d042731	Zm00001d032480	actin 7	actin 7	actin 7
1297	OG0000068	Gh_A08G0945	Zm00001d012277	Zm00001d013873	actin 7	actin 7	actin 7
1298	OG0000068	Gh_A08G0945	Zm00001d012277	Zm00001d032480	actin 7	actin 7	actin 7
1299	OG0000068	Gh_A11G3240	Zm00001d011087	Zm00001d032480	actin 7	actin 7	actin 7
1300	OG0000068	Gh_A11G3240	Zm00001d011087	Zm00001d013873	actin 7	actin 7	actin 7
1301	OG0000068	Gh_A11G3240	Zm00001d035722	Zm00001d032480	actin 7	actin 7	actin 7
1302	OG0000068	Gh_A11G3240	Zm00001d035722	Zm00001d013873	actin 7	actin 7	actin 7
1303	OG0000068	Gh_A11G3240	Zm00001d011086	Zm00001d032480	actin 7	actin 7	actin 7
1304	OG0000068	Gh_A11G3240	Zm00001d011086	Zm00001d013873	actin 7	actin 7	actin 7
1305	OG0000068	Gh_A11G3240	Zm00001d035720	Zm00001d032480	actin 7	actin 7	actin 7
1306	OG0000068	Gh_A11G3240	Zm00001d035720	Zm00001d013873	actin 7	actin 7	actin 7
1307	OG0000068	Gh_D08G1154	Zm00001d008746	Zm00001d032480	actin 7	actin 7	actin 7
1308	OG0000068	Gh_D08G1154	Zm00001d008746	Zm00001d013873	actin 7	actin 7	actin 7
1309	OG0000068	Gh_D11G3453	Zm00001d011087	Zm00001d032480	actin 7	actin 7	actin 7
1310	OG0000068	Gh_D11G3453	Zm00001d011087	Zm00001d013873	actin 7	actin 7	actin 7
1311	OG0000068	Gh_D11G3453	Zm00001d035722	Zm00001d032480	actin 7	actin 7	actin 7
1312	OG0000068	Gh_D11G3453	Zm00001d035722	Zm00001d013873	actin 7	actin 7	actin 7
1313	OG0000068	Gh_D11G3453	Zm00001d011086	Zm00001d032480	actin 7	actin 7	actin 7
1314	OG0000068	Gh_D11G3453	Zm00001d011086	Zm00001d013873	actin 7	actin 7	actin 7
1315	OG0000068	Gh_D11G3453	Zm00001d035720	Zm00001d032480	actin 7	actin 7	actin 7
1316	OG0000068	Gh_D11G3453	Zm00001d035720	Zm00001d013873	actin 7	actin 7	actin 7
1317	OG0000070	Gh_A08G1896	Zm00001d007111	Zm00001d029143	Protein kinase superfamily protein	Protein kinase superfamily protein	Protein kinase superfamily protein
1318	OG0000070	Gh_A08G1896	Zm00001d022499	Zm00001d029143	Protein kinase superfamily protein	Protein kinase superfamily protein	Protein kinase superfamily protein
1319	OG0000070	Gh_A08G1896	Zm00001d047482	Zm00001d029143	Protein kinase superfamily protein	Protein kinase superfamily protein	Protein kinase superfamily protein
1320	OG0000070	Gh_A08G1896	Zm00001d029143	Zm00001d029143	Protein kinase superfamily protein	Protein kinase superfamily protein	Protein kinase superfamily protein
1321	OG0000070	Gh_A08G1896	Zm00001d029143	Zm00001d007111	Protein kinase superfamily protein	Protein kinase superfamily protein	Protein kinase superfamily protein
1322	OG0000070	Gh_A08G1896	Zm00001d029143	Zm00001d022499	Protein kinase superfamily protein	Protein kinase superfamily protein	Protein kinase superfamily protein
1323	OG0000070	Gh_A08G1896	Zm00001d029143	Zm00001d047482	Protein kinase superfamily protein	Protein kinase superfamily protein	Protein kinase superfamily protein
1324	OG0000070	Gh_A08G1896	Zm00001d040829	Zm00001d029143	Protein kinase superfamily protein	Protein kinase superfamily protein	Protein kinase superfamily protein
1325	OG0000070	Gh_A10G2277	Zm00001d007111	Zm00001d029143	Protein kinase superfamily protein	Protein kinase superfamily protein	Protein kinase superfamily protein
1326	OG0000070	Gh_A10G2277	Zm00001d022499	Zm00001d029143	Protein kinase superfamily protein	Protein kinase superfamily protein	Protein kinase superfamily protein
1327	OG0000070	Gh_A10G2277	Zm00001d047482	Zm00001d029143	Protein kinase superfamily protein	Protein kinase superfamily protein	Protein kinase superfamily protein
1328	OG0000070	Gh_A10G2277	Zm00001d029143	Zm00001d029143	Protein kinase superfamily protein	Protein kinase superfamily protein	Protein kinase superfamily protein
1329	OG0000070	Gh_A10G2277	Zm00001d029143	Zm00001d007111	Protein kinase superfamily protein	Protein kinase superfamily protein	Protein kinase superfamily protein
1330	OG0000070	Gh_A10G2277	Zm00001d029143	Zm00001d022499	Protein kinase superfamily protein	Protein kinase superfamily protein	Protein kinase superfamily protein
1331	OG0000070	Gh_A10G2277	Zm00001d029143	Zm00001d047482	Protein kinase superfamily protein	Protein kinase superfamily protein	Protein kinase superfamily protein
1332	OG0000070	Gh_A10G2277	Zm00001d040829	Zm00001d029143	Protein kinase superfamily protein	Protein kinase superfamily protein	Protein kinase superfamily protein
1333	OG0000070	Gh_A11G2330	Zm00001d007111	Zm00001d029143	Protein kinase superfamily protein	Protein kinase superfamily protein	Protein kinase superfamily protein
1334	OG0000070	Gh_A11G2330	Zm00001d022499	Zm00001d029143	Protein kinase superfamily protein	Protein kinase superfamily protein	Protein kinase superfamily protein
1335	OG0000070	Gh_A11G2330	Zm00001d047482	Zm00001d029143	Protein kinase superfamily protein	Protein kinase superfamily protein	Protein kinase superfamily protein
1336	OG0000070	Gh_A11G2330	Zm00001d029143	Zm00001d029143	Protein kinase superfamily protein	Protein kinase superfamily protein	Protein kinase superfamily protein
1337	OG0000070	Gh_A11G2330	Zm00001d029143	Zm00001d007111	Protein kinase superfamily protein	Protein kinase superfamily protein	Protein kinase superfamily protein
1338	OG0000070	Gh_A11G2330	Zm00001d029143	Zm00001d022499	Protein kinase superfamily protein	Protein kinase superfamily protein	Protein kinase superfamily protein
1339	OG0000070	Gh_A11G2330	Zm00001d029143	Zm00001d047482	Protein kinase superfamily protein	Protein kinase superfamily protein	Protein kinase superfamily protein
1340	OG0000070	Gh_A11G2330	Zm00001d040829	Zm00001d029143	Protein kinase superfamily protein	Protein kinase superfamily protein	Protein kinase superfamily protein
1341	OG0000070	Gh_A13G1507	Zm00001d007111	Zm00001d029143	Protein kinase superfamily protein	Protein kinase superfamily protein	Protein kinase superfamily protein
1342	OG0000070	Gh_A13G1507	Zm00001d022499	Zm00001d029143	Protein kinase superfamily protein	Protein kinase superfamily protein	Protein kinase superfamily protein
1343	OG0000070	Gh_A13G1507	Zm00001d047482	Zm00001d029143	Protein kinase superfamily protein	Protein kinase superfamily protein	Protein kinase superfamily protein
1344	OG0000070	Gh_A13G1507	Zm00001d029143	Zm00001d029143	Protein kinase superfamily protein	Protein kinase superfamily protein	Protein kinase superfamily protein
1345	OG0000070	Gh_A13G1507	Zm00001d029143	Zm00001d007111	Protein kinase superfamily protein	Protein kinase superfamily protein	Protein kinase superfamily protein
1346	OG0000070	Gh_A13G1507	Zm00001d029143	Zm00001d022499	Protein kinase superfamily protein	Protein kinase superfamily protein	Protein kinase superfamily protein
1347	OG0000070	Gh_A13G1507	Zm00001d029143	Zm00001d047482	Protein kinase superfamily protein	Protein kinase superfamily protein	Protein kinase superfamily protein
1348	OG0000070	Gh_A13G1507	Zm00001d040829	Zm00001d029143	Protein kinase superfamily protein	Protein kinase superfamily protein	Protein kinase superfamily protein
1349	OG0000070	Gh_D08G2261	Zm00001d007111	Zm00001d029143	Protein kinase superfamily protein	Protein kinase superfamily protein	Protein kinase superfamily protein
1350	OG0000070	Gh_D08G2261	Zm00001d022499	Zm00001d029143	Protein kinase superfamily protein	Protein kinase superfamily protein	Protein kinase superfamily protein
1351	OG0000070	Gh_D08G2261	Zm00001d047482	Zm00001d029143	Protein kinase superfamily protein	Protein kinase superfamily protein	Protein kinase superfamily protein
1352	OG0000070	Gh_D08G2261	Zm00001d029143	Zm00001d029143	Protein kinase superfamily protein	Protein kinase superfamily protein	Protein kinase superfamily protein
1353	OG0000070	Gh_D08G2261	Zm00001d029143	Zm00001d007111	Protein kinase superfamily protein	Protein kinase superfamily protein	Protein kinase superfamily protein
1354	OG0000070	Gh_D08G2261	Zm00001d029143	Zm00001d022499	Protein kinase superfamily protein	Protein kinase superfamily protein	Protein kinase superfamily protein
1355	OG0000070	Gh_D08G2261	Zm00001d029143	Zm00001d047482	Protein kinase superfamily protein	Protein kinase superfamily protein	Protein kinase superfamily protein
1356	OG0000070	Gh_D08G2261	Zm00001d040829	Zm00001d029143	Protein kinase superfamily protein	Protein kinase superfamily protein	Protein kinase superfamily protein
1357	OG0000070	Gh_D10G1657	Zm00001d007111	Zm00001d029143	Protein kinase superfamily protein	Protein kinase superfamily protein	Protein kinase superfamily protein
1358	OG0000070	Gh_D10G1657	Zm00001d022499	Zm00001d029143	Protein kinase superfamily protein	Protein kinase superfamily protein	Protein kinase superfamily protein
1359	OG0000070	Gh_D10G1657	Zm00001d047482	Zm00001d029143	Protein kinase superfamily protein	Protein kinase superfamily protein	Protein kinase superfamily protein
1360	OG0000070	Gh_D10G1657	Zm00001d029143	Zm00001d047482	Protein kinase superfamily protein	Protein kinase superfamily protein	Protein kinase superfamily protein
1361	OG0000070	Gh_D10G1657	Zm00001d029143	Zm00001d029143	Protein kinase superfamily protein	Protein kinase superfamily protein	Protein kinase superfamily protein
1362	OG0000070	Gh_D10G1657	Zm00001d029143	Zm00001d007111	Protein kinase superfamily protein	Protein kinase superfamily protein	Protein kinase superfamily protein
1363	OG0000070	Gh_D10G1657	Zm00001d029143	Zm00001d022499	Protein kinase superfamily protein	Protein kinase superfamily protein	Protein kinase superfamily protein
1364	OG0000070	Gh_D10G1657	Zm00001d040829	Zm00001d029143	Protein kinase superfamily protein	Protein kinase superfamily protein	Protein kinase superfamily protein
1365	OG0000070	Gh_D11G2644	Zm00001d007111	Zm00001d029143	Protein kinase superfamily protein	Protein kinase superfamily protein	Protein kinase superfamily protein
1366	OG0000070	Gh_D11G2644	Zm00001d022499	Zm00001d029143	Protein kinase superfamily protein	Protein kinase superfamily protein	Protein kinase superfamily protein
1367	OG0000070	Gh_D11G2644	Zm00001d047482	Zm00001d029143	Protein kinase superfamily protein	Protein kinase superfamily protein	Protein kinase superfamily protein
1368	OG0000070	Gh_D11G2644	Zm00001d029143	Zm00001d007111	Protein kinase superfamily protein	Protein kinase superfamily protein	Protein kinase superfamily protein
1369	OG0000070	Gh_D11G2644	Zm00001d029143	Zm00001d029143	Protein kinase superfamily protein	Protein kinase superfamily protein	Protein kinase superfamily protein
1370	OG0000070	Gh_D11G2644	Zm00001d029143	Zm00001d022499	Protein kinase superfamily protein	Protein kinase superfamily protein	Protein kinase superfamily protein
1371	OG0000070	Gh_D11G2644	Zm00001d029143	Zm00001d047482	Protein kinase superfamily protein	Protein kinase superfamily protein	Protein kinase superfamily protein
1372	OG0000070	Gh_D11G2644	Zm00001d040829	Zm00001d029143	Protein kinase superfamily protein	Protein kinase superfamily protein	Protein kinase superfamily protein
1373	OG0000070	Gh_D13G1836	Zm00001d029143	NA	Protein kinase superfamily protein	Protein kinase superfamily protein	N/A
1374	OG0000078	Gh_A01G0895	Zm00001d028399	Zm00001d038069	receptor serine/threonine kinase, putative	Pathogenesis-related thaumatin superfamily protein	Pathogenesis-related thaumatin superfamily protein
1375	OG0000078	Gh_A01G0895	Zm00001d022637	Zm00001d038069	receptor serine/threonine kinase, putative	Pathogenesis-related thaumatin superfamily protein	Pathogenesis-related thaumatin superfamily protein
1376	OG0000078	Gh_A01G1377	Zm00001d047939	Zm00001d028399	Pathogenesis-related thaumatin superfamily protein	Pathogenesis-related thaumatin superfamily protein	Pathogenesis-related thaumatin superfamily protein
1377	OG0000078	Gh_A01G1377	Zm00001d047939	Zm00001d022637	Pathogenesis-related thaumatin superfamily protein	Pathogenesis-related thaumatin superfamily protein	Pathogenesis-related thaumatin superfamily protein
1378	OG0000078	Gh_A01G1377	Zm00001d028399	Zm00001d028399	Pathogenesis-related thaumatin superfamily protein	Pathogenesis-related thaumatin superfamily protein	Pathogenesis-related thaumatin superfamily protein
1379	OG0000078	Gh_A01G1377	Zm00001d028399	Zm00001d032027	Pathogenesis-related thaumatin superfamily protein	Pathogenesis-related thaumatin superfamily protein	N/A
1380	OG0000078	Gh_A01G1377	Zm00001d028399	Zm00001d053215	Pathogenesis-related thaumatin superfamily protein	Pathogenesis-related thaumatin superfamily protein	Pathogenesis-related thaumatin superfamily protein
1381	OG0000078	Gh_A01G1377	Zm00001d028399	Zm00001d022637	Pathogenesis-related thaumatin superfamily protein	Pathogenesis-related thaumatin superfamily protein	Pathogenesis-related thaumatin superfamily protein
1382	OG0000078	Gh_A01G1377	Zm00001d028399	Zm00001d047939	Pathogenesis-related thaumatin superfamily protein	Pathogenesis-related thaumatin superfamily protein	Pathogenesis-related thaumatin superfamily protein
1383	OG0000078	Gh_A01G1377	Zm00001d032027	Zm00001d028399	Pathogenesis-related thaumatin superfamily protein	N/A	Pathogenesis-related thaumatin superfamily protein
1384	OG0000078	Gh_A01G1377	Zm00001d032027	Zm00001d022637	Pathogenesis-related thaumatin superfamily protein	N/A	Pathogenesis-related thaumatin superfamily protein
1385	OG0000078	Gh_A01G1377	Zm00001d002414	Zm00001d028399	Pathogenesis-related thaumatin superfamily protein	Pathogenesis-related thaumatin superfamily protein	Pathogenesis-related thaumatin superfamily protein
1386	OG0000078	Gh_A01G1377	Zm00001d002414	Zm00001d022637	Pathogenesis-related thaumatin superfamily protein	Pathogenesis-related thaumatin superfamily protein	Pathogenesis-related thaumatin superfamily protein
1387	OG0000078	Gh_A01G1377	Zm00001d053215	Zm00001d028399	Pathogenesis-related thaumatin superfamily protein	Pathogenesis-related thaumatin superfamily protein	Pathogenesis-related thaumatin superfamily protein
1388	OG0000078	Gh_A01G1377	Zm00001d053215	Zm00001d022637	Pathogenesis-related thaumatin superfamily protein	Pathogenesis-related thaumatin superfamily protein	Pathogenesis-related thaumatin superfamily protein
1389	OG0000078	Gh_A01G1377	Zm00001d022637	Zm00001d028399	Pathogenesis-related thaumatin superfamily protein	Pathogenesis-related thaumatin superfamily protein	Pathogenesis-related thaumatin superfamily protein
1390	OG0000078	Gh_A01G1377	Zm00001d022637	Zm00001d032027	Pathogenesis-related thaumatin superfamily protein	Pathogenesis-related thaumatin superfamily protein	N/A
1391	OG0000078	Gh_A01G1377	Zm00001d022637	Zm00001d053215	Pathogenesis-related thaumatin superfamily protein	Pathogenesis-related thaumatin superfamily protein	Pathogenesis-related thaumatin superfamily protein
1392	OG0000078	Gh_A01G1377	Zm00001d022637	Zm00001d022637	Pathogenesis-related thaumatin superfamily protein	Pathogenesis-related thaumatin superfamily protein	Pathogenesis-related thaumatin superfamily protein
1393	OG0000078	Gh_A01G1377	Zm00001d022637	Zm00001d047939	Pathogenesis-related thaumatin superfamily protein	Pathogenesis-related thaumatin superfamily protein	Pathogenesis-related thaumatin superfamily protein
1394	OG0000078	Gh_A03G1805	Zm00001d028399	Zm00001d030303	Pathogenesis-related thaumatin superfamily protein	Pathogenesis-related thaumatin superfamily protein	Pathogenesis-related thaumatin superfamily protein
1395	OG0000078	Gh_A03G1805	Zm00001d028399	Zm00001d014313	Pathogenesis-related thaumatin superfamily protein	Pathogenesis-related thaumatin superfamily protein	Pathogenesis-related thaumatin superfamily protein
1396	OG0000078	Gh_A03G1805	Zm00001d022637	Zm00001d030303	Pathogenesis-related thaumatin superfamily protein	Pathogenesis-related thaumatin superfamily protein	Pathogenesis-related thaumatin superfamily protein
1397	OG0000078	Gh_A03G1805	Zm00001d022637	Zm00001d014313	Pathogenesis-related thaumatin superfamily protein	Pathogenesis-related thaumatin superfamily protein	Pathogenesis-related thaumatin superfamily protein
1398	OG0000078	Gh_A05G1594	Zm00001d047939	Zm00001d028399	receptor serine/threonine kinase, putative	Pathogenesis-related thaumatin superfamily protein	Pathogenesis-related thaumatin superfamily protein
1399	OG0000078	Gh_A05G1594	Zm00001d047939	Zm00001d032027	receptor serine/threonine kinase, putative	Pathogenesis-related thaumatin superfamily protein	N/A
1400	OG0000078	Gh_A05G1594	Zm00001d047939	Zm00001d053215	receptor serine/threonine kinase, putative	Pathogenesis-related thaumatin superfamily protein	Pathogenesis-related thaumatin superfamily protein
1401	OG0000078	Gh_A05G1594	Zm00001d047939	Zm00001d022637	receptor serine/threonine kinase, putative	Pathogenesis-related thaumatin superfamily protein	Pathogenesis-related thaumatin superfamily protein
1402	OG0000078	Gh_A05G1594	Zm00001d047939	Zm00001d047939	receptor serine/threonine kinase, putative	Pathogenesis-related thaumatin superfamily protein	Pathogenesis-related thaumatin superfamily protein
1403	OG0000078	Gh_A05G1594	Zm00001d028399	Zm00001d028399	receptor serine/threonine kinase, putative	Pathogenesis-related thaumatin superfamily protein	Pathogenesis-related thaumatin superfamily protein
1404	OG0000078	Gh_A05G1594	Zm00001d028399	Zm00001d032027	receptor serine/threonine kinase, putative	Pathogenesis-related thaumatin superfamily protein	N/A
1405	OG0000078	Gh_A05G1594	Zm00001d028399	Zm00001d053215	receptor serine/threonine kinase, putative	Pathogenesis-related thaumatin superfamily protein	Pathogenesis-related thaumatin superfamily protein
1406	OG0000078	Gh_A05G1594	Zm00001d028399	Zm00001d022637	receptor serine/threonine kinase, putative	Pathogenesis-related thaumatin superfamily protein	Pathogenesis-related thaumatin superfamily protein
1407	OG0000078	Gh_A05G1594	Zm00001d028399	Zm00001d047939	receptor serine/threonine kinase, putative	Pathogenesis-related thaumatin superfamily protein	Pathogenesis-related thaumatin superfamily protein
1408	OG0000078	Gh_A05G1594	Zm00001d032027	Zm00001d028399	receptor serine/threonine kinase, putative	N/A	Pathogenesis-related thaumatin superfamily protein
1409	OG0000078	Gh_A05G1594	Zm00001d032027	Zm00001d032027	receptor serine/threonine kinase, putative	N/A	N/A
1410	OG0000078	Gh_A05G1594	Zm00001d032027	Zm00001d053215	receptor serine/threonine kinase, putative	N/A	Pathogenesis-related thaumatin superfamily protein
1411	OG0000078	Gh_A05G1594	Zm00001d032027	Zm00001d022637	receptor serine/threonine kinase, putative	N/A	Pathogenesis-related thaumatin superfamily protein
1412	OG0000078	Gh_A05G1594	Zm00001d032027	Zm00001d047939	receptor serine/threonine kinase, putative	N/A	Pathogenesis-related thaumatin superfamily protein
1413	OG0000078	Gh_A05G1594	Zm00001d002414	Zm00001d028399	receptor serine/threonine kinase, putative	Pathogenesis-related thaumatin superfamily protein	Pathogenesis-related thaumatin superfamily protein
1414	OG0000078	Gh_A05G1594	Zm00001d002414	Zm00001d032027	receptor serine/threonine kinase, putative	Pathogenesis-related thaumatin superfamily protein	N/A
1415	OG0000078	Gh_A05G1594	Zm00001d002414	Zm00001d053215	receptor serine/threonine kinase, putative	Pathogenesis-related thaumatin superfamily protein	Pathogenesis-related thaumatin superfamily protein
1416	OG0000078	Gh_A05G1594	Zm00001d002414	Zm00001d022637	receptor serine/threonine kinase, putative	Pathogenesis-related thaumatin superfamily protein	Pathogenesis-related thaumatin superfamily protein
1417	OG0000078	Gh_A05G1594	Zm00001d002414	Zm00001d047939	receptor serine/threonine kinase, putative	Pathogenesis-related thaumatin superfamily protein	Pathogenesis-related thaumatin superfamily protein
1418	OG0000078	Gh_A05G1594	Zm00001d053215	Zm00001d028399	receptor serine/threonine kinase, putative	Pathogenesis-related thaumatin superfamily protein	Pathogenesis-related thaumatin superfamily protein
1419	OG0000078	Gh_A05G1594	Zm00001d053215	Zm00001d032027	receptor serine/threonine kinase, putative	Pathogenesis-related thaumatin superfamily protein	N/A
1420	OG0000078	Gh_A05G1594	Zm00001d053215	Zm00001d053215	receptor serine/threonine kinase, putative	Pathogenesis-related thaumatin superfamily protein	Pathogenesis-related thaumatin superfamily protein
1421	OG0000078	Gh_A05G1594	Zm00001d053215	Zm00001d022637	receptor serine/threonine kinase, putative	Pathogenesis-related thaumatin superfamily protein	Pathogenesis-related thaumatin superfamily protein
1422	OG0000078	Gh_A05G1594	Zm00001d053215	Zm00001d047939	receptor serine/threonine kinase, putative	Pathogenesis-related thaumatin superfamily protein	Pathogenesis-related thaumatin superfamily protein
1423	OG0000078	Gh_A05G1594	Zm00001d022637	Zm00001d028399	receptor serine/threonine kinase, putative	Pathogenesis-related thaumatin superfamily protein	Pathogenesis-related thaumatin superfamily protein
1424	OG0000078	Gh_A05G1594	Zm00001d022637	Zm00001d032027	receptor serine/threonine kinase, putative	Pathogenesis-related thaumatin superfamily protein	N/A
1425	OG0000078	Gh_A05G1594	Zm00001d022637	Zm00001d053215	receptor serine/threonine kinase, putative	Pathogenesis-related thaumatin superfamily protein	Pathogenesis-related thaumatin superfamily protein
1426	OG0000078	Gh_A05G1594	Zm00001d022637	Zm00001d022637	receptor serine/threonine kinase, putative	Pathogenesis-related thaumatin superfamily protein	Pathogenesis-related thaumatin superfamily protein
1427	OG0000078	Gh_A05G1594	Zm00001d022637	Zm00001d047939	receptor serine/threonine kinase, putative	Pathogenesis-related thaumatin superfamily protein	Pathogenesis-related thaumatin superfamily protein
1428	OG0000078	Gh_A06G0032	Zm00001d047939	Zm00001d028399	receptor serine/threonine kinase, putative	Pathogenesis-related thaumatin superfamily protein	Pathogenesis-related thaumatin superfamily protein
1429	OG0000078	Gh_A06G0032	Zm00001d047939	Zm00001d022637	receptor serine/threonine kinase, putative	Pathogenesis-related thaumatin superfamily protein	Pathogenesis-related thaumatin superfamily protein
1430	OG0000078	Gh_A06G0032	Zm00001d028399	Zm00001d028399	receptor serine/threonine kinase, putative	Pathogenesis-related thaumatin superfamily protein	Pathogenesis-related thaumatin superfamily protein
1431	OG0000078	Gh_A06G0032	Zm00001d028399	Zm00001d032027	receptor serine/threonine kinase, putative	Pathogenesis-related thaumatin superfamily protein	N/A
1432	OG0000078	Gh_A06G0032	Zm00001d028399	Zm00001d053215	receptor serine/threonine kinase, putative	Pathogenesis-related thaumatin superfamily protein	Pathogenesis-related thaumatin superfamily protein
1433	OG0000078	Gh_A06G0032	Zm00001d028399	Zm00001d022637	receptor serine/threonine kinase, putative	Pathogenesis-related thaumatin superfamily protein	Pathogenesis-related thaumatin superfamily protein
1434	OG0000078	Gh_A06G0032	Zm00001d028399	Zm00001d047939	receptor serine/threonine kinase, putative	Pathogenesis-related thaumatin superfamily protein	Pathogenesis-related thaumatin superfamily protein
1435	OG0000078	Gh_A06G0032	Zm00001d032027	Zm00001d028399	receptor serine/threonine kinase, putative	N/A	Pathogenesis-related thaumatin superfamily protein
1436	OG0000078	Gh_A06G0032	Zm00001d032027	Zm00001d022637	receptor serine/threonine kinase, putative	N/A	Pathogenesis-related thaumatin superfamily protein
1437	OG0000078	Gh_A06G0032	Zm00001d002414	Zm00001d028399	receptor serine/threonine kinase, putative	Pathogenesis-related thaumatin superfamily protein	Pathogenesis-related thaumatin superfamily protein
1438	OG0000078	Gh_A06G0032	Zm00001d002414	Zm00001d022637	receptor serine/threonine kinase, putative	Pathogenesis-related thaumatin superfamily protein	Pathogenesis-related thaumatin superfamily protein
1439	OG0000078	Gh_A06G0032	Zm00001d053215	Zm00001d028399	receptor serine/threonine kinase, putative	Pathogenesis-related thaumatin superfamily protein	Pathogenesis-related thaumatin superfamily protein
1440	OG0000078	Gh_A06G0032	Zm00001d053215	Zm00001d022637	receptor serine/threonine kinase, putative	Pathogenesis-related thaumatin superfamily protein	Pathogenesis-related thaumatin superfamily protein
1441	OG0000078	Gh_A06G0032	Zm00001d022637	Zm00001d028399	receptor serine/threonine kinase, putative	Pathogenesis-related thaumatin superfamily protein	Pathogenesis-related thaumatin superfamily protein
1442	OG0000078	Gh_A06G0032	Zm00001d022637	Zm00001d032027	receptor serine/threonine kinase, putative	Pathogenesis-related thaumatin superfamily protein	N/A
1443	OG0000078	Gh_A06G0032	Zm00001d022637	Zm00001d053215	receptor serine/threonine kinase, putative	Pathogenesis-related thaumatin superfamily protein	Pathogenesis-related thaumatin superfamily protein
1444	OG0000078	Gh_A06G0032	Zm00001d022637	Zm00001d022637	receptor serine/threonine kinase, putative	Pathogenesis-related thaumatin superfamily protein	Pathogenesis-related thaumatin superfamily protein
1445	OG0000078	Gh_A06G0032	Zm00001d022637	Zm00001d047939	receptor serine/threonine kinase, putative	Pathogenesis-related thaumatin superfamily protein	Pathogenesis-related thaumatin superfamily protein
1446	OG0000078	Gh_A11G0393	Zm00001d047939	Zm00001d047939	Pathogenesis-related thaumatin superfamily protein	Pathogenesis-related thaumatin superfamily protein	Pathogenesis-related thaumatin superfamily protein
1447	OG0000078	Gh_A11G0393	Zm00001d047939	Zm00001d028399	Pathogenesis-related thaumatin superfamily protein	Pathogenesis-related thaumatin superfamily protein	Pathogenesis-related thaumatin superfamily protein
1448	OG0000078	Gh_A11G0393	Zm00001d047939	Zm00001d032027	Pathogenesis-related thaumatin superfamily protein	Pathogenesis-related thaumatin superfamily protein	N/A
1449	OG0000078	Gh_A11G0393	Zm00001d047939	Zm00001d053215	Pathogenesis-related thaumatin superfamily protein	Pathogenesis-related thaumatin superfamily protein	Pathogenesis-related thaumatin superfamily protein
1450	OG0000078	Gh_A11G0393	Zm00001d047939	Zm00001d022637	Pathogenesis-related thaumatin superfamily protein	Pathogenesis-related thaumatin superfamily protein	Pathogenesis-related thaumatin superfamily protein
1451	OG0000078	Gh_A11G0393	Zm00001d028399	Zm00001d047939	Pathogenesis-related thaumatin superfamily protein	Pathogenesis-related thaumatin superfamily protein	Pathogenesis-related thaumatin superfamily protein
1452	OG0000078	Gh_A11G0393	Zm00001d028399	Zm00001d028399	Pathogenesis-related thaumatin superfamily protein	Pathogenesis-related thaumatin superfamily protein	Pathogenesis-related thaumatin superfamily protein
1453	OG0000078	Gh_A11G0393	Zm00001d028399	Zm00001d032027	Pathogenesis-related thaumatin superfamily protein	Pathogenesis-related thaumatin superfamily protein	N/A
1454	OG0000078	Gh_A11G0393	Zm00001d028399	Zm00001d053215	Pathogenesis-related thaumatin superfamily protein	Pathogenesis-related thaumatin superfamily protein	Pathogenesis-related thaumatin superfamily protein
1455	OG0000078	Gh_A11G0393	Zm00001d028399	Zm00001d022637	Pathogenesis-related thaumatin superfamily protein	Pathogenesis-related thaumatin superfamily protein	Pathogenesis-related thaumatin superfamily protein
1456	OG0000078	Gh_A11G0393	Zm00001d032027	Zm00001d047939	Pathogenesis-related thaumatin superfamily protein	N/A	Pathogenesis-related thaumatin superfamily protein
1457	OG0000078	Gh_A11G0393	Zm00001d032027	Zm00001d028399	Pathogenesis-related thaumatin superfamily protein	N/A	Pathogenesis-related thaumatin superfamily protein
1458	OG0000078	Gh_A11G0393	Zm00001d032027	Zm00001d032027	Pathogenesis-related thaumatin superfamily protein	N/A	N/A
1459	OG0000078	Gh_A11G0393	Zm00001d032027	Zm00001d053215	Pathogenesis-related thaumatin superfamily protein	N/A	Pathogenesis-related thaumatin superfamily protein
1460	OG0000078	Gh_A11G0393	Zm00001d032027	Zm00001d022637	Pathogenesis-related thaumatin superfamily protein	N/A	Pathogenesis-related thaumatin superfamily protein
1461	OG0000078	Gh_A11G0393	Zm00001d002414	Zm00001d047939	Pathogenesis-related thaumatin superfamily protein	Pathogenesis-related thaumatin superfamily protein	Pathogenesis-related thaumatin superfamily protein
1462	OG0000078	Gh_A11G0393	Zm00001d002414	Zm00001d028399	Pathogenesis-related thaumatin superfamily protein	Pathogenesis-related thaumatin superfamily protein	Pathogenesis-related thaumatin superfamily protein
1463	OG0000078	Gh_A11G0393	Zm00001d002414	Zm00001d032027	Pathogenesis-related thaumatin superfamily protein	Pathogenesis-related thaumatin superfamily protein	N/A
1464	OG0000078	Gh_A11G0393	Zm00001d002414	Zm00001d053215	Pathogenesis-related thaumatin superfamily protein	Pathogenesis-related thaumatin superfamily protein	Pathogenesis-related thaumatin superfamily protein
1465	OG0000078	Gh_A11G0393	Zm00001d002414	Zm00001d022637	Pathogenesis-related thaumatin superfamily protein	Pathogenesis-related thaumatin superfamily protein	Pathogenesis-related thaumatin superfamily protein
1466	OG0000078	Gh_A11G0393	Zm00001d053215	Zm00001d047939	Pathogenesis-related thaumatin superfamily protein	Pathogenesis-related thaumatin superfamily protein	Pathogenesis-related thaumatin superfamily protein
1467	OG0000078	Gh_A11G0393	Zm00001d053215	Zm00001d028399	Pathogenesis-related thaumatin superfamily protein	Pathogenesis-related thaumatin superfamily protein	Pathogenesis-related thaumatin superfamily protein
1468	OG0000078	Gh_A11G0393	Zm00001d053215	Zm00001d032027	Pathogenesis-related thaumatin superfamily protein	Pathogenesis-related thaumatin superfamily protein	N/A
1469	OG0000078	Gh_A11G0393	Zm00001d053215	Zm00001d053215	Pathogenesis-related thaumatin superfamily protein	Pathogenesis-related thaumatin superfamily protein	Pathogenesis-related thaumatin superfamily protein
1470	OG0000078	Gh_A11G0393	Zm00001d053215	Zm00001d022637	Pathogenesis-related thaumatin superfamily protein	Pathogenesis-related thaumatin superfamily protein	Pathogenesis-related thaumatin superfamily protein
1471	OG0000078	Gh_A11G0393	Zm00001d022637	Zm00001d047939	Pathogenesis-related thaumatin superfamily protein	Pathogenesis-related thaumatin superfamily protein	Pathogenesis-related thaumatin superfamily protein
1472	OG0000078	Gh_A11G0393	Zm00001d022637	Zm00001d028399	Pathogenesis-related thaumatin superfamily protein	Pathogenesis-related thaumatin superfamily protein	Pathogenesis-related thaumatin superfamily protein
1473	OG0000078	Gh_A11G0393	Zm00001d022637	Zm00001d032027	Pathogenesis-related thaumatin superfamily protein	Pathogenesis-related thaumatin superfamily protein	N/A
1474	OG0000078	Gh_A11G0393	Zm00001d022637	Zm00001d053215	Pathogenesis-related thaumatin superfamily protein	Pathogenesis-related thaumatin superfamily protein	Pathogenesis-related thaumatin superfamily protein
1475	OG0000078	Gh_A11G0393	Zm00001d022637	Zm00001d022637	Pathogenesis-related thaumatin superfamily protein	Pathogenesis-related thaumatin superfamily protein	Pathogenesis-related thaumatin superfamily protein
1476	OG0000078	Gh_A11G1607	Zm00001d047939	Zm00001d022637	Pathogenesis-related thaumatin superfamily protein	Pathogenesis-related thaumatin superfamily protein	Pathogenesis-related thaumatin superfamily protein
1477	OG0000078	Gh_A11G1607	Zm00001d047939	Zm00001d028399	Pathogenesis-related thaumatin superfamily protein	Pathogenesis-related thaumatin superfamily protein	Pathogenesis-related thaumatin superfamily protein
1478	OG0000078	Gh_A11G1607	Zm00001d028399	Zm00001d022637	Pathogenesis-related thaumatin superfamily protein	Pathogenesis-related thaumatin superfamily protein	Pathogenesis-related thaumatin superfamily protein
1479	OG0000078	Gh_A11G1607	Zm00001d028399	Zm00001d028399	Pathogenesis-related thaumatin superfamily protein	Pathogenesis-related thaumatin superfamily protein	Pathogenesis-related thaumatin superfamily protein
1480	OG0000078	Gh_A11G1607	Zm00001d028399	Zm00001d032027	Pathogenesis-related thaumatin superfamily protein	Pathogenesis-related thaumatin superfamily protein	N/A
1481	OG0000078	Gh_A11G1607	Zm00001d028399	Zm00001d053215	Pathogenesis-related thaumatin superfamily protein	Pathogenesis-related thaumatin superfamily protein	Pathogenesis-related thaumatin superfamily protein
1482	OG0000078	Gh_A11G1607	Zm00001d028399	Zm00001d047939	Pathogenesis-related thaumatin superfamily protein	Pathogenesis-related thaumatin superfamily protein	Pathogenesis-related thaumatin superfamily protein
1483	OG0000078	Gh_A11G1607	Zm00001d032027	Zm00001d022637	Pathogenesis-related thaumatin superfamily protein	N/A	Pathogenesis-related thaumatin superfamily protein
1484	OG0000078	Gh_A11G1607	Zm00001d032027	Zm00001d028399	Pathogenesis-related thaumatin superfamily protein	N/A	Pathogenesis-related thaumatin superfamily protein
1485	OG0000078	Gh_A11G1607	Zm00001d002414	Zm00001d022637	Pathogenesis-related thaumatin superfamily protein	Pathogenesis-related thaumatin superfamily protein	Pathogenesis-related thaumatin superfamily protein
1486	OG0000078	Gh_A11G1607	Zm00001d002414	Zm00001d028399	Pathogenesis-related thaumatin superfamily protein	Pathogenesis-related thaumatin superfamily protein	Pathogenesis-related thaumatin superfamily protein
1487	OG0000078	Gh_A11G1607	Zm00001d053215	Zm00001d022637	Pathogenesis-related thaumatin superfamily protein	Pathogenesis-related thaumatin superfamily protein	Pathogenesis-related thaumatin superfamily protein
1488	OG0000078	Gh_A11G1607	Zm00001d053215	Zm00001d028399	Pathogenesis-related thaumatin superfamily protein	Pathogenesis-related thaumatin superfamily protein	Pathogenesis-related thaumatin superfamily protein
1489	OG0000078	Gh_A11G1607	Zm00001d022637	Zm00001d022637	Pathogenesis-related thaumatin superfamily protein	Pathogenesis-related thaumatin superfamily protein	Pathogenesis-related thaumatin superfamily protein
1490	OG0000078	Gh_A11G1607	Zm00001d022637	Zm00001d028399	Pathogenesis-related thaumatin superfamily protein	Pathogenesis-related thaumatin superfamily protein	Pathogenesis-related thaumatin superfamily protein
1491	OG0000078	Gh_A11G1607	Zm00001d022637	Zm00001d032027	Pathogenesis-related thaumatin superfamily protein	Pathogenesis-related thaumatin superfamily protein	N/A
1492	OG0000078	Gh_A11G1607	Zm00001d022637	Zm00001d053215	Pathogenesis-related thaumatin superfamily protein	Pathogenesis-related thaumatin superfamily protein	Pathogenesis-related thaumatin superfamily protein
1493	OG0000078	Gh_A11G1607	Zm00001d022637	Zm00001d047939	Pathogenesis-related thaumatin superfamily protein	Pathogenesis-related thaumatin superfamily protein	Pathogenesis-related thaumatin superfamily protein
1494	OG0000078	Gh_A12G0546	Zm00001d047939	Zm00001d028399	Pathogenesis-related thaumatin superfamily protein	Pathogenesis-related thaumatin superfamily protein	Pathogenesis-related thaumatin superfamily protein
1495	OG0000078	Gh_A12G0546	Zm00001d047939	Zm00001d022637	Pathogenesis-related thaumatin superfamily protein	Pathogenesis-related thaumatin superfamily protein	Pathogenesis-related thaumatin superfamily protein
1496	OG0000078	Gh_A12G0546	Zm00001d028399	Zm00001d032027	Pathogenesis-related thaumatin superfamily protein	Pathogenesis-related thaumatin superfamily protein	N/A
1497	OG0000078	Gh_A12G0546	Zm00001d028399	Zm00001d028399	Pathogenesis-related thaumatin superfamily protein	Pathogenesis-related thaumatin superfamily protein	Pathogenesis-related thaumatin superfamily protein
1498	OG0000078	Gh_A12G0546	Zm00001d028399	Zm00001d053215	Pathogenesis-related thaumatin superfamily protein	Pathogenesis-related thaumatin superfamily protein	Pathogenesis-related thaumatin superfamily protein
1499	OG0000078	Gh_A12G0546	Zm00001d028399	Zm00001d022637	Pathogenesis-related thaumatin superfamily protein	Pathogenesis-related thaumatin superfamily protein	Pathogenesis-related thaumatin superfamily protein
1500	OG0000078	Gh_A12G0546	Zm00001d028399	Zm00001d047939	Pathogenesis-related thaumatin superfamily protein	Pathogenesis-related thaumatin superfamily protein	Pathogenesis-related thaumatin superfamily protein
1501	OG0000078	Gh_A12G0546	Zm00001d032027	Zm00001d028399	Pathogenesis-related thaumatin superfamily protein	N/A	Pathogenesis-related thaumatin superfamily protein
1502	OG0000078	Gh_A12G0546	Zm00001d032027	Zm00001d022637	Pathogenesis-related thaumatin superfamily protein	N/A	Pathogenesis-related thaumatin superfamily protein
1503	OG0000078	Gh_A12G0546	Zm00001d002414	Zm00001d028399	Pathogenesis-related thaumatin superfamily protein	Pathogenesis-related thaumatin superfamily protein	Pathogenesis-related thaumatin superfamily protein
1504	OG0000078	Gh_A12G0546	Zm00001d002414	Zm00001d022637	Pathogenesis-related thaumatin superfamily protein	Pathogenesis-related thaumatin superfamily protein	Pathogenesis-related thaumatin superfamily protein
1505	OG0000078	Gh_A12G0546	Zm00001d053215	Zm00001d028399	Pathogenesis-related thaumatin superfamily protein	Pathogenesis-related thaumatin superfamily protein	Pathogenesis-related thaumatin superfamily protein
1506	OG0000078	Gh_A12G0546	Zm00001d053215	Zm00001d022637	Pathogenesis-related thaumatin superfamily protein	Pathogenesis-related thaumatin superfamily protein	Pathogenesis-related thaumatin superfamily protein
1507	OG0000078	Gh_A12G0546	Zm00001d022637	Zm00001d032027	Pathogenesis-related thaumatin superfamily protein	Pathogenesis-related thaumatin superfamily protein	N/A
1508	OG0000078	Gh_A12G0546	Zm00001d022637	Zm00001d028399	Pathogenesis-related thaumatin superfamily protein	Pathogenesis-related thaumatin superfamily protein	Pathogenesis-related thaumatin superfamily protein
1509	OG0000078	Gh_A12G0546	Zm00001d022637	Zm00001d053215	Pathogenesis-related thaumatin superfamily protein	Pathogenesis-related thaumatin superfamily protein	Pathogenesis-related thaumatin superfamily protein
1510	OG0000078	Gh_A12G0546	Zm00001d022637	Zm00001d022637	Pathogenesis-related thaumatin superfamily protein	Pathogenesis-related thaumatin superfamily protein	Pathogenesis-related thaumatin superfamily protein
1511	OG0000078	Gh_A12G0546	Zm00001d022637	Zm00001d047939	Pathogenesis-related thaumatin superfamily protein	Pathogenesis-related thaumatin superfamily protein	Pathogenesis-related thaumatin superfamily protein
1512	OG0000078	Gh_D01G0933	Zm00001d047939	Zm00001d028399	receptor serine/threonine kinase, putative	Pathogenesis-related thaumatin superfamily protein	Pathogenesis-related thaumatin superfamily protein
1513	OG0000078	Gh_D01G0933	Zm00001d047939	Zm00001d022637	receptor serine/threonine kinase, putative	Pathogenesis-related thaumatin superfamily protein	Pathogenesis-related thaumatin superfamily protein
1514	OG0000078	Gh_D01G0933	Zm00001d028399	Zm00001d028399	receptor serine/threonine kinase, putative	Pathogenesis-related thaumatin superfamily protein	Pathogenesis-related thaumatin superfamily protein
1515	OG0000078	Gh_D01G0933	Zm00001d028399	Zm00001d032027	receptor serine/threonine kinase, putative	Pathogenesis-related thaumatin superfamily protein	N/A
1516	OG0000078	Gh_D01G0933	Zm00001d028399	Zm00001d053215	receptor serine/threonine kinase, putative	Pathogenesis-related thaumatin superfamily protein	Pathogenesis-related thaumatin superfamily protein
1517	OG0000078	Gh_D01G0933	Zm00001d028399	Zm00001d022637	receptor serine/threonine kinase, putative	Pathogenesis-related thaumatin superfamily protein	Pathogenesis-related thaumatin superfamily protein
1518	OG0000078	Gh_D01G0933	Zm00001d028399	Zm00001d047939	receptor serine/threonine kinase, putative	Pathogenesis-related thaumatin superfamily protein	Pathogenesis-related thaumatin superfamily protein
1519	OG0000078	Gh_D01G0933	Zm00001d032027	Zm00001d028399	receptor serine/threonine kinase, putative	N/A	Pathogenesis-related thaumatin superfamily protein
1520	OG0000078	Gh_D01G0933	Zm00001d032027	Zm00001d022637	receptor serine/threonine kinase, putative	N/A	Pathogenesis-related thaumatin superfamily protein
1521	OG0000078	Gh_D01G0933	Zm00001d002414	Zm00001d028399	receptor serine/threonine kinase, putative	Pathogenesis-related thaumatin superfamily protein	Pathogenesis-related thaumatin superfamily protein
1522	OG0000078	Gh_D01G0933	Zm00001d002414	Zm00001d022637	receptor serine/threonine kinase, putative	Pathogenesis-related thaumatin superfamily protein	Pathogenesis-related thaumatin superfamily protein
1523	OG0000078	Gh_D01G0933	Zm00001d053215	Zm00001d028399	receptor serine/threonine kinase, putative	Pathogenesis-related thaumatin superfamily protein	Pathogenesis-related thaumatin superfamily protein
1524	OG0000078	Gh_D01G0933	Zm00001d053215	Zm00001d022637	receptor serine/threonine kinase, putative	Pathogenesis-related thaumatin superfamily protein	Pathogenesis-related thaumatin superfamily protein
1525	OG0000078	Gh_D01G0933	Zm00001d022637	Zm00001d028399	receptor serine/threonine kinase, putative	Pathogenesis-related thaumatin superfamily protein	Pathogenesis-related thaumatin superfamily protein
1526	OG0000078	Gh_D01G0933	Zm00001d022637	Zm00001d032027	receptor serine/threonine kinase, putative	Pathogenesis-related thaumatin superfamily protein	N/A
1527	OG0000078	Gh_D01G0933	Zm00001d022637	Zm00001d053215	receptor serine/threonine kinase, putative	Pathogenesis-related thaumatin superfamily protein	Pathogenesis-related thaumatin superfamily protein
1528	OG0000078	Gh_D01G0933	Zm00001d022637	Zm00001d022637	receptor serine/threonine kinase, putative	Pathogenesis-related thaumatin superfamily protein	Pathogenesis-related thaumatin superfamily protein
1529	OG0000078	Gh_D01G0933	Zm00001d022637	Zm00001d047939	receptor serine/threonine kinase, putative	Pathogenesis-related thaumatin superfamily protein	Pathogenesis-related thaumatin superfamily protein
1530	OG0000078	Gh_D01G1620	Zm00001d047939	Zm00001d028399	Pathogenesis-related thaumatin superfamily protein	Pathogenesis-related thaumatin superfamily protein	Pathogenesis-related thaumatin superfamily protein
1531	OG0000078	Gh_D01G1620	Zm00001d047939	Zm00001d022637	Pathogenesis-related thaumatin superfamily protein	Pathogenesis-related thaumatin superfamily protein	Pathogenesis-related thaumatin superfamily protein
1532	OG0000078	Gh_D01G1620	Zm00001d028399	Zm00001d028399	Pathogenesis-related thaumatin superfamily protein	Pathogenesis-related thaumatin superfamily protein	Pathogenesis-related thaumatin superfamily protein
1533	OG0000078	Gh_D01G1620	Zm00001d028399	Zm00001d032027	Pathogenesis-related thaumatin superfamily protein	Pathogenesis-related thaumatin superfamily protein	N/A
1534	OG0000078	Gh_D01G1620	Zm00001d028399	Zm00001d053215	Pathogenesis-related thaumatin superfamily protein	Pathogenesis-related thaumatin superfamily protein	Pathogenesis-related thaumatin superfamily protein
1535	OG0000078	Gh_D01G1620	Zm00001d028399	Zm00001d022637	Pathogenesis-related thaumatin superfamily protein	Pathogenesis-related thaumatin superfamily protein	Pathogenesis-related thaumatin superfamily protein
1536	OG0000078	Gh_D01G1620	Zm00001d028399	Zm00001d047939	Pathogenesis-related thaumatin superfamily protein	Pathogenesis-related thaumatin superfamily protein	Pathogenesis-related thaumatin superfamily protein
1537	OG0000078	Gh_D01G1620	Zm00001d032027	Zm00001d028399	Pathogenesis-related thaumatin superfamily protein	N/A	Pathogenesis-related thaumatin superfamily protein
1538	OG0000078	Gh_D01G1620	Zm00001d032027	Zm00001d022637	Pathogenesis-related thaumatin superfamily protein	N/A	Pathogenesis-related thaumatin superfamily protein
1539	OG0000078	Gh_D01G1620	Zm00001d002414	Zm00001d028399	Pathogenesis-related thaumatin superfamily protein	Pathogenesis-related thaumatin superfamily protein	Pathogenesis-related thaumatin superfamily protein
1540	OG0000078	Gh_D01G1620	Zm00001d002414	Zm00001d022637	Pathogenesis-related thaumatin superfamily protein	Pathogenesis-related thaumatin superfamily protein	Pathogenesis-related thaumatin superfamily protein
1541	OG0000078	Gh_D01G1620	Zm00001d053215	Zm00001d028399	Pathogenesis-related thaumatin superfamily protein	Pathogenesis-related thaumatin superfamily protein	Pathogenesis-related thaumatin superfamily protein
1542	OG0000078	Gh_D01G1620	Zm00001d053215	Zm00001d022637	Pathogenesis-related thaumatin superfamily protein	Pathogenesis-related thaumatin superfamily protein	Pathogenesis-related thaumatin superfamily protein
1543	OG0000078	Gh_D01G1620	Zm00001d022637	Zm00001d028399	Pathogenesis-related thaumatin superfamily protein	Pathogenesis-related thaumatin superfamily protein	Pathogenesis-related thaumatin superfamily protein
1544	OG0000078	Gh_D01G1620	Zm00001d022637	Zm00001d032027	Pathogenesis-related thaumatin superfamily protein	Pathogenesis-related thaumatin superfamily protein	N/A
1545	OG0000078	Gh_D01G1620	Zm00001d022637	Zm00001d053215	Pathogenesis-related thaumatin superfamily protein	Pathogenesis-related thaumatin superfamily protein	Pathogenesis-related thaumatin superfamily protein
1546	OG0000078	Gh_D01G1620	Zm00001d022637	Zm00001d022637	Pathogenesis-related thaumatin superfamily protein	Pathogenesis-related thaumatin superfamily protein	Pathogenesis-related thaumatin superfamily protein
1547	OG0000078	Gh_D01G1620	Zm00001d022637	Zm00001d047939	Pathogenesis-related thaumatin superfamily protein	Pathogenesis-related thaumatin superfamily protein	Pathogenesis-related thaumatin superfamily protein
1548	OG0000078	Gh_D02G2239	Zm00001d028399	Zm00001d030303	Pathogenesis-related thaumatin superfamily protein	Pathogenesis-related thaumatin superfamily protein	Pathogenesis-related thaumatin superfamily protein
1549	OG0000078	Gh_D02G2239	Zm00001d028399	Zm00001d014313	Pathogenesis-related thaumatin superfamily protein	Pathogenesis-related thaumatin superfamily protein	Pathogenesis-related thaumatin superfamily protein
1550	OG0000078	Gh_D02G2239	Zm00001d022637	Zm00001d030303	Pathogenesis-related thaumatin superfamily protein	Pathogenesis-related thaumatin superfamily protein	Pathogenesis-related thaumatin superfamily protein
1551	OG0000078	Gh_D02G2239	Zm00001d022637	Zm00001d014313	Pathogenesis-related thaumatin superfamily protein	Pathogenesis-related thaumatin superfamily protein	Pathogenesis-related thaumatin superfamily protein
1552	OG0000078	Gh_D05G1772	Zm00001d047939	Zm00001d028399	receptor serine/threonine kinase, putative	Pathogenesis-related thaumatin superfamily protein	Pathogenesis-related thaumatin superfamily protein
1553	OG0000078	Gh_D05G1772	Zm00001d047939	Zm00001d022637	receptor serine/threonine kinase, putative	Pathogenesis-related thaumatin superfamily protein	Pathogenesis-related thaumatin superfamily protein
1554	OG0000078	Gh_D05G1772	Zm00001d028399	Zm00001d028399	receptor serine/threonine kinase, putative	Pathogenesis-related thaumatin superfamily protein	Pathogenesis-related thaumatin superfamily protein
1555	OG0000078	Gh_D05G1772	Zm00001d028399	Zm00001d032027	receptor serine/threonine kinase, putative	Pathogenesis-related thaumatin superfamily protein	N/A
1556	OG0000078	Gh_D05G1772	Zm00001d028399	Zm00001d053215	receptor serine/threonine kinase, putative	Pathogenesis-related thaumatin superfamily protein	Pathogenesis-related thaumatin superfamily protein
1557	OG0000078	Gh_D05G1772	Zm00001d028399	Zm00001d022637	receptor serine/threonine kinase, putative	Pathogenesis-related thaumatin superfamily protein	Pathogenesis-related thaumatin superfamily protein
1558	OG0000078	Gh_D05G1772	Zm00001d028399	Zm00001d047939	receptor serine/threonine kinase, putative	Pathogenesis-related thaumatin superfamily protein	Pathogenesis-related thaumatin superfamily protein
1559	OG0000078	Gh_D05G1772	Zm00001d032027	Zm00001d028399	receptor serine/threonine kinase, putative	N/A	Pathogenesis-related thaumatin superfamily protein
1560	OG0000078	Gh_D05G1772	Zm00001d032027	Zm00001d022637	receptor serine/threonine kinase, putative	N/A	Pathogenesis-related thaumatin superfamily protein
1561	OG0000078	Gh_D05G1772	Zm00001d002414	Zm00001d028399	receptor serine/threonine kinase, putative	Pathogenesis-related thaumatin superfamily protein	Pathogenesis-related thaumatin superfamily protein
1562	OG0000078	Gh_D05G1772	Zm00001d002414	Zm00001d022637	receptor serine/threonine kinase, putative	Pathogenesis-related thaumatin superfamily protein	Pathogenesis-related thaumatin superfamily protein
1563	OG0000078	Gh_D05G1772	Zm00001d053215	Zm00001d028399	receptor serine/threonine kinase, putative	Pathogenesis-related thaumatin superfamily protein	Pathogenesis-related thaumatin superfamily protein
1564	OG0000078	Gh_D05G1772	Zm00001d053215	Zm00001d022637	receptor serine/threonine kinase, putative	Pathogenesis-related thaumatin superfamily protein	Pathogenesis-related thaumatin superfamily protein
1565	OG0000078	Gh_D05G1772	Zm00001d022637	Zm00001d028399	receptor serine/threonine kinase, putative	Pathogenesis-related thaumatin superfamily protein	Pathogenesis-related thaumatin superfamily protein
1566	OG0000078	Gh_D05G1772	Zm00001d022637	Zm00001d032027	receptor serine/threonine kinase, putative	Pathogenesis-related thaumatin superfamily protein	N/A
1567	OG0000078	Gh_D05G1772	Zm00001d022637	Zm00001d053215	receptor serine/threonine kinase, putative	Pathogenesis-related thaumatin superfamily protein	Pathogenesis-related thaumatin superfamily protein
1568	OG0000078	Gh_D05G1772	Zm00001d022637	Zm00001d022637	receptor serine/threonine kinase, putative	Pathogenesis-related thaumatin superfamily protein	Pathogenesis-related thaumatin superfamily protein
1569	OG0000078	Gh_D05G1772	Zm00001d022637	Zm00001d047939	receptor serine/threonine kinase, putative	Pathogenesis-related thaumatin superfamily protein	Pathogenesis-related thaumatin superfamily protein
1570	OG0000078	Gh_D06G2282	Zm00001d047939	Zm00001d028399	receptor serine/threonine kinase, putative	Pathogenesis-related thaumatin superfamily protein	Pathogenesis-related thaumatin superfamily protein
1571	OG0000078	Gh_D06G2282	Zm00001d047939	Zm00001d022637	receptor serine/threonine kinase, putative	Pathogenesis-related thaumatin superfamily protein	Pathogenesis-related thaumatin superfamily protein
1572	OG0000078	Gh_D06G2282	Zm00001d028399	Zm00001d028399	receptor serine/threonine kinase, putative	Pathogenesis-related thaumatin superfamily protein	Pathogenesis-related thaumatin superfamily protein
1573	OG0000078	Gh_D06G2282	Zm00001d028399	Zm00001d032027	receptor serine/threonine kinase, putative	Pathogenesis-related thaumatin superfamily protein	N/A
1574	OG0000078	Gh_D06G2282	Zm00001d028399	Zm00001d053215	receptor serine/threonine kinase, putative	Pathogenesis-related thaumatin superfamily protein	Pathogenesis-related thaumatin superfamily protein
1575	OG0000078	Gh_D06G2282	Zm00001d028399	Zm00001d022637	receptor serine/threonine kinase, putative	Pathogenesis-related thaumatin superfamily protein	Pathogenesis-related thaumatin superfamily protein
1576	OG0000078	Gh_D06G2282	Zm00001d028399	Zm00001d047939	receptor serine/threonine kinase, putative	Pathogenesis-related thaumatin superfamily protein	Pathogenesis-related thaumatin superfamily protein
1577	OG0000078	Gh_D06G2282	Zm00001d032027	Zm00001d028399	receptor serine/threonine kinase, putative	N/A	Pathogenesis-related thaumatin superfamily protein
1578	OG0000078	Gh_D06G2282	Zm00001d032027	Zm00001d022637	receptor serine/threonine kinase, putative	N/A	Pathogenesis-related thaumatin superfamily protein
1579	OG0000078	Gh_D06G2282	Zm00001d002414	Zm00001d028399	receptor serine/threonine kinase, putative	Pathogenesis-related thaumatin superfamily protein	Pathogenesis-related thaumatin superfamily protein
1580	OG0000078	Gh_D06G2282	Zm00001d002414	Zm00001d022637	receptor serine/threonine kinase, putative	Pathogenesis-related thaumatin superfamily protein	Pathogenesis-related thaumatin superfamily protein
1581	OG0000078	Gh_D06G2282	Zm00001d053215	Zm00001d028399	receptor serine/threonine kinase, putative	Pathogenesis-related thaumatin superfamily protein	Pathogenesis-related thaumatin superfamily protein
1582	OG0000078	Gh_D06G2282	Zm00001d053215	Zm00001d022637	receptor serine/threonine kinase, putative	Pathogenesis-related thaumatin superfamily protein	Pathogenesis-related thaumatin superfamily protein
1583	OG0000078	Gh_D06G2282	Zm00001d022637	Zm00001d028399	receptor serine/threonine kinase, putative	Pathogenesis-related thaumatin superfamily protein	Pathogenesis-related thaumatin superfamily protein
1584	OG0000078	Gh_D06G2282	Zm00001d022637	Zm00001d032027	receptor serine/threonine kinase, putative	Pathogenesis-related thaumatin superfamily protein	N/A
1585	OG0000078	Gh_D06G2282	Zm00001d022637	Zm00001d053215	receptor serine/threonine kinase, putative	Pathogenesis-related thaumatin superfamily protein	Pathogenesis-related thaumatin superfamily protein
1586	OG0000078	Gh_D06G2282	Zm00001d022637	Zm00001d022637	receptor serine/threonine kinase, putative	Pathogenesis-related thaumatin superfamily protein	Pathogenesis-related thaumatin superfamily protein
1587	OG0000078	Gh_D06G2282	Zm00001d022637	Zm00001d047939	receptor serine/threonine kinase, putative	Pathogenesis-related thaumatin superfamily protein	Pathogenesis-related thaumatin superfamily protein
1588	OG0000078	Gh_D11G0457	Zm00001d047939	Zm00001d028399	Pathogenesis-related thaumatin superfamily protein	Pathogenesis-related thaumatin superfamily protein	Pathogenesis-related thaumatin superfamily protein
1589	OG0000078	Gh_D11G0457	Zm00001d047939	Zm00001d032027	Pathogenesis-related thaumatin superfamily protein	Pathogenesis-related thaumatin superfamily protein	N/A
1590	OG0000078	Gh_D11G0457	Zm00001d047939	Zm00001d053215	Pathogenesis-related thaumatin superfamily protein	Pathogenesis-related thaumatin superfamily protein	Pathogenesis-related thaumatin superfamily protein
1591	OG0000078	Gh_D11G0457	Zm00001d047939	Zm00001d022637	Pathogenesis-related thaumatin superfamily protein	Pathogenesis-related thaumatin superfamily protein	Pathogenesis-related thaumatin superfamily protein
1592	OG0000078	Gh_D11G0457	Zm00001d047939	Zm00001d047939	Pathogenesis-related thaumatin superfamily protein	Pathogenesis-related thaumatin superfamily protein	Pathogenesis-related thaumatin superfamily protein
1593	OG0000078	Gh_D11G0457	Zm00001d028399	Zm00001d028399	Pathogenesis-related thaumatin superfamily protein	Pathogenesis-related thaumatin superfamily protein	Pathogenesis-related thaumatin superfamily protein
1594	OG0000078	Gh_D11G0457	Zm00001d028399	Zm00001d032027	Pathogenesis-related thaumatin superfamily protein	Pathogenesis-related thaumatin superfamily protein	N/A
1595	OG0000078	Gh_D11G0457	Zm00001d028399	Zm00001d053215	Pathogenesis-related thaumatin superfamily protein	Pathogenesis-related thaumatin superfamily protein	Pathogenesis-related thaumatin superfamily protein
1596	OG0000078	Gh_D11G0457	Zm00001d028399	Zm00001d022637	Pathogenesis-related thaumatin superfamily protein	Pathogenesis-related thaumatin superfamily protein	Pathogenesis-related thaumatin superfamily protein
1597	OG0000078	Gh_D11G0457	Zm00001d028399	Zm00001d047939	Pathogenesis-related thaumatin superfamily protein	Pathogenesis-related thaumatin superfamily protein	Pathogenesis-related thaumatin superfamily protein
1598	OG0000078	Gh_D11G0457	Zm00001d032027	Zm00001d028399	Pathogenesis-related thaumatin superfamily protein	N/A	Pathogenesis-related thaumatin superfamily protein
1599	OG0000078	Gh_D11G0457	Zm00001d032027	Zm00001d032027	Pathogenesis-related thaumatin superfamily protein	N/A	N/A
1600	OG0000078	Gh_D11G0457	Zm00001d032027	Zm00001d053215	Pathogenesis-related thaumatin superfamily protein	N/A	Pathogenesis-related thaumatin superfamily protein
1601	OG0000078	Gh_D11G0457	Zm00001d032027	Zm00001d022637	Pathogenesis-related thaumatin superfamily protein	N/A	Pathogenesis-related thaumatin superfamily protein
1602	OG0000078	Gh_D11G0457	Zm00001d032027	Zm00001d047939	Pathogenesis-related thaumatin superfamily protein	N/A	Pathogenesis-related thaumatin superfamily protein
1603	OG0000078	Gh_D11G0457	Zm00001d002414	Zm00001d028399	Pathogenesis-related thaumatin superfamily protein	Pathogenesis-related thaumatin superfamily protein	Pathogenesis-related thaumatin superfamily protein
1604	OG0000078	Gh_D11G0457	Zm00001d002414	Zm00001d032027	Pathogenesis-related thaumatin superfamily protein	Pathogenesis-related thaumatin superfamily protein	N/A
1605	OG0000078	Gh_D11G0457	Zm00001d002414	Zm00001d053215	Pathogenesis-related thaumatin superfamily protein	Pathogenesis-related thaumatin superfamily protein	Pathogenesis-related thaumatin superfamily protein
1606	OG0000078	Gh_D11G0457	Zm00001d002414	Zm00001d022637	Pathogenesis-related thaumatin superfamily protein	Pathogenesis-related thaumatin superfamily protein	Pathogenesis-related thaumatin superfamily protein
1607	OG0000078	Gh_D11G0457	Zm00001d002414	Zm00001d047939	Pathogenesis-related thaumatin superfamily protein	Pathogenesis-related thaumatin superfamily protein	Pathogenesis-related thaumatin superfamily protein
1608	OG0000078	Gh_D11G0457	Zm00001d053215	Zm00001d028399	Pathogenesis-related thaumatin superfamily protein	Pathogenesis-related thaumatin superfamily protein	Pathogenesis-related thaumatin superfamily protein
1609	OG0000078	Gh_D11G0457	Zm00001d053215	Zm00001d032027	Pathogenesis-related thaumatin superfamily protein	Pathogenesis-related thaumatin superfamily protein	N/A
1610	OG0000078	Gh_D11G0457	Zm00001d053215	Zm00001d053215	Pathogenesis-related thaumatin superfamily protein	Pathogenesis-related thaumatin superfamily protein	Pathogenesis-related thaumatin superfamily protein
1611	OG0000078	Gh_D11G0457	Zm00001d053215	Zm00001d022637	Pathogenesis-related thaumatin superfamily protein	Pathogenesis-related thaumatin superfamily protein	Pathogenesis-related thaumatin superfamily protein
1612	OG0000078	Gh_D11G0457	Zm00001d053215	Zm00001d047939	Pathogenesis-related thaumatin superfamily protein	Pathogenesis-related thaumatin superfamily protein	Pathogenesis-related thaumatin superfamily protein
1613	OG0000078	Gh_D11G0457	Zm00001d022637	Zm00001d028399	Pathogenesis-related thaumatin superfamily protein	Pathogenesis-related thaumatin superfamily protein	Pathogenesis-related thaumatin superfamily protein
1614	OG0000078	Gh_D11G0457	Zm00001d022637	Zm00001d032027	Pathogenesis-related thaumatin superfamily protein	Pathogenesis-related thaumatin superfamily protein	N/A
1615	OG0000078	Gh_D11G0457	Zm00001d022637	Zm00001d053215	Pathogenesis-related thaumatin superfamily protein	Pathogenesis-related thaumatin superfamily protein	Pathogenesis-related thaumatin superfamily protein
1616	OG0000078	Gh_D11G0457	Zm00001d022637	Zm00001d022637	Pathogenesis-related thaumatin superfamily protein	Pathogenesis-related thaumatin superfamily protein	Pathogenesis-related thaumatin superfamily protein
1617	OG0000078	Gh_D11G0457	Zm00001d022637	Zm00001d047939	Pathogenesis-related thaumatin superfamily protein	Pathogenesis-related thaumatin superfamily protein	Pathogenesis-related thaumatin superfamily protein
1618	OG0000078	Gh_D11G1764	Zm00001d047939	Zm00001d028399	Pathogenesis-related thaumatin superfamily protein	Pathogenesis-related thaumatin superfamily protein	Pathogenesis-related thaumatin superfamily protein
1619	OG0000078	Gh_D11G1764	Zm00001d047939	Zm00001d022637	Pathogenesis-related thaumatin superfamily protein	Pathogenesis-related thaumatin superfamily protein	Pathogenesis-related thaumatin superfamily protein
1620	OG0000078	Gh_D11G1764	Zm00001d028399	Zm00001d053215	Pathogenesis-related thaumatin superfamily protein	Pathogenesis-related thaumatin superfamily protein	Pathogenesis-related thaumatin superfamily protein
1621	OG0000078	Gh_D11G1764	Zm00001d028399	Zm00001d028399	Pathogenesis-related thaumatin superfamily protein	Pathogenesis-related thaumatin superfamily protein	Pathogenesis-related thaumatin superfamily protein
1622	OG0000078	Gh_D11G1764	Zm00001d028399	Zm00001d032027	Pathogenesis-related thaumatin superfamily protein	Pathogenesis-related thaumatin superfamily protein	N/A
1623	OG0000078	Gh_D11G1764	Zm00001d028399	Zm00001d022637	Pathogenesis-related thaumatin superfamily protein	Pathogenesis-related thaumatin superfamily protein	Pathogenesis-related thaumatin superfamily protein
1624	OG0000078	Gh_D11G1764	Zm00001d028399	Zm00001d047939	Pathogenesis-related thaumatin superfamily protein	Pathogenesis-related thaumatin superfamily protein	Pathogenesis-related thaumatin superfamily protein
1625	OG0000078	Gh_D11G1764	Zm00001d032027	Zm00001d028399	Pathogenesis-related thaumatin superfamily protein	N/A	Pathogenesis-related thaumatin superfamily protein
1626	OG0000078	Gh_D11G1764	Zm00001d032027	Zm00001d022637	Pathogenesis-related thaumatin superfamily protein	N/A	Pathogenesis-related thaumatin superfamily protein
1627	OG0000078	Gh_D11G1764	Zm00001d002414	Zm00001d028399	Pathogenesis-related thaumatin superfamily protein	Pathogenesis-related thaumatin superfamily protein	Pathogenesis-related thaumatin superfamily protein
1628	OG0000078	Gh_D11G1764	Zm00001d002414	Zm00001d022637	Pathogenesis-related thaumatin superfamily protein	Pathogenesis-related thaumatin superfamily protein	Pathogenesis-related thaumatin superfamily protein
1629	OG0000078	Gh_D11G1764	Zm00001d053215	Zm00001d028399	Pathogenesis-related thaumatin superfamily protein	Pathogenesis-related thaumatin superfamily protein	Pathogenesis-related thaumatin superfamily protein
1630	OG0000078	Gh_D11G1764	Zm00001d053215	Zm00001d022637	Pathogenesis-related thaumatin superfamily protein	Pathogenesis-related thaumatin superfamily protein	Pathogenesis-related thaumatin superfamily protein
1631	OG0000078	Gh_D11G1764	Zm00001d022637	Zm00001d053215	Pathogenesis-related thaumatin superfamily protein	Pathogenesis-related thaumatin superfamily protein	Pathogenesis-related thaumatin superfamily protein
1632	OG0000078	Gh_D11G1764	Zm00001d022637	Zm00001d028399	Pathogenesis-related thaumatin superfamily protein	Pathogenesis-related thaumatin superfamily protein	Pathogenesis-related thaumatin superfamily protein
1633	OG0000078	Gh_D11G1764	Zm00001d022637	Zm00001d032027	Pathogenesis-related thaumatin superfamily protein	Pathogenesis-related thaumatin superfamily protein	N/A
1634	OG0000078	Gh_D11G1764	Zm00001d022637	Zm00001d022637	Pathogenesis-related thaumatin superfamily protein	Pathogenesis-related thaumatin superfamily protein	Pathogenesis-related thaumatin superfamily protein
1635	OG0000078	Gh_D11G1764	Zm00001d022637	Zm00001d047939	Pathogenesis-related thaumatin superfamily protein	Pathogenesis-related thaumatin superfamily protein	Pathogenesis-related thaumatin superfamily protein
1636	OG0000080	Gh_A01G1728	Zm00001d011246	NA	Putative lysine decarboxylase family protein	Putative lysine decarboxylase family protein	N/A
1637	OG0000080	Gh_A04G0492	Zm00001d039174	Zm00001d011246	Putative lysine decarboxylase family protein	Putative lysine decarboxylase family protein	Putative lysine decarboxylase family protein
1638	OG0000080	Gh_A04G0492	Zm00001d011246	Zm00001d011246	Putative lysine decarboxylase family protein	Putative lysine decarboxylase family protein	Putative lysine decarboxylase family protein
1639	OG0000080	Gh_A09G1277	Zm00001d039174	Zm00001d011246	Putative lysine decarboxylase family protein	Putative lysine decarboxylase family protein	Putative lysine decarboxylase family protein
1640	OG0000080	Gh_A09G1277	Zm00001d011246	Zm00001d011246	Putative lysine decarboxylase family protein	Putative lysine decarboxylase family protein	Putative lysine decarboxylase family protein
1641	OG0000080	Gh_D01G1977	Zm00001d039174	Zm00001d011246	Putative lysine decarboxylase family protein	Putative lysine decarboxylase family protein	Putative lysine decarboxylase family protein
1642	OG0000080	Gh_D01G1977	Zm00001d011246	Zm00001d011246	Putative lysine decarboxylase family protein	Putative lysine decarboxylase family protein	Putative lysine decarboxylase family protein
1643	OG0000080	Gh_D09G2445	Zm00001d039174	Zm00001d011246	Putative lysine decarboxylase family protein	Putative lysine decarboxylase family protein	Putative lysine decarboxylase family protein
1644	OG0000080	Gh_D09G2445	Zm00001d011246	Zm00001d011246	Putative lysine decarboxylase family protein	Putative lysine decarboxylase family protein	Putative lysine decarboxylase family protein
1645	OG0000082	Gh_A07G1077	Zm00001d034022	NA	beta-6 tubulin	tubulin beta-5 chain	N/A
1646	OG0000083	Gh_D13G2231	Zm00001d023570	Zm00001d023570	Disease resistance-responsive (dirigent-like protein) family protein	Disease resistance-responsive (dirigent-like protein) family protein	Disease resistance-responsive (dirigent-like protein) family protein
1647	OG0000083	Gh_D13G2231	Zm00001d023570	Zm00001d023575	Disease resistance-responsive (dirigent-like protein) family protein	Disease resistance-responsive (dirigent-like protein) family protein	Disease resistance-responsive (dirigent-like protein) family protein
1648	OG0000083	Gh_D13G2231	Zm00001d023570	Zm00001d004753	Disease resistance-responsive (dirigent-like protein) family protein	Disease resistance-responsive (dirigent-like protein) family protein	Disease resistance-responsive (dirigent-like protein) family protein
1649	OG0000083	Gh_D13G2231	Zm00001d023570	Zm00001d004758	Disease resistance-responsive (dirigent-like protein) family protein	Disease resistance-responsive (dirigent-like protein) family protein	Disease resistance-responsive (dirigent-like protein) family protein
1650	OG0000083	Gh_D13G2231	Zm00001d023570	Zm00001d053055	Disease resistance-responsive (dirigent-like protein) family protein	Disease resistance-responsive (dirigent-like protein) family protein	Disease resistance-responsive (dirigent-like protein) family protein
1651	OG0000083	Gh_D13G2231	Zm00001d023575	Zm00001d023570	Disease resistance-responsive (dirigent-like protein) family protein	Disease resistance-responsive (dirigent-like protein) family protein	Disease resistance-responsive (dirigent-like protein) family protein
1652	OG0000083	Gh_D13G2231	Zm00001d023575	Zm00001d023575	Disease resistance-responsive (dirigent-like protein) family protein	Disease resistance-responsive (dirigent-like protein) family protein	Disease resistance-responsive (dirigent-like protein) family protein
1653	OG0000083	Gh_D13G2231	Zm00001d023575	Zm00001d004753	Disease resistance-responsive (dirigent-like protein) family protein	Disease resistance-responsive (dirigent-like protein) family protein	Disease resistance-responsive (dirigent-like protein) family protein
1654	OG0000083	Gh_D13G2231	Zm00001d023575	Zm00001d004758	Disease resistance-responsive (dirigent-like protein) family protein	Disease resistance-responsive (dirigent-like protein) family protein	Disease resistance-responsive (dirigent-like protein) family protein
1655	OG0000083	Gh_D13G2231	Zm00001d023575	Zm00001d053055	Disease resistance-responsive (dirigent-like protein) family protein	Disease resistance-responsive (dirigent-like protein) family protein	Disease resistance-responsive (dirigent-like protein) family protein
1656	OG0000083	Gh_D13G2231	Zm00001d004754	Zm00001d023570	Disease resistance-responsive (dirigent-like protein) family protein	Disease resistance-responsive (dirigent-like protein) family protein	Disease resistance-responsive (dirigent-like protein) family protein
1657	OG0000083	Gh_D13G2231	Zm00001d004754	Zm00001d023575	Disease resistance-responsive (dirigent-like protein) family protein	Disease resistance-responsive (dirigent-like protein) family protein	Disease resistance-responsive (dirigent-like protein) family protein
1658	OG0000083	Gh_D13G2231	Zm00001d004754	Zm00001d004753	Disease resistance-responsive (dirigent-like protein) family protein	Disease resistance-responsive (dirigent-like protein) family protein	Disease resistance-responsive (dirigent-like protein) family protein
1659	OG0000083	Gh_D13G2231	Zm00001d004754	Zm00001d004758	Disease resistance-responsive (dirigent-like protein) family protein	Disease resistance-responsive (dirigent-like protein) family protein	Disease resistance-responsive (dirigent-like protein) family protein
1660	OG0000083	Gh_D13G2231	Zm00001d004754	Zm00001d053055	Disease resistance-responsive (dirigent-like protein) family protein	Disease resistance-responsive (dirigent-like protein) family protein	Disease resistance-responsive (dirigent-like protein) family protein
1661	OG0000086	Gh_A01G0386	Zm00001d010596	NA	Protein of unknown function (DUF640)	Protein of unknown function (DUF640)	N/A
1662	OG0000086	Gh_A03G0216	Zm00001d010596	Zm00001d043011	Protein of unknown function (DUF640)	Protein of unknown function (DUF640)	Protein of unknown function (DUF640)
1663	OG0000086	Gh_A03G0216	Zm00001d010596	Zm00001d012473	Protein of unknown function (DUF640)	Protein of unknown function (DUF640)	Protein of unknown function (DUF640)
1664	OG0000086	Gh_A04G0343	Zm00001d010596	NA	Protein of unknown function (DUF640)	Protein of unknown function (DUF640)	N/A
1665	OG0000086	Gh_A05G0940	Zm00001d010596	NA	Protein of unknown function (DUF640)	Protein of unknown function (DUF640)	N/A
1666	OG0000086	Gh_A05G1300	Zm00001d010596	NA	Protein of unknown function (DUF640)	Protein of unknown function (DUF640)	N/A
1667	OG0000086	Gh_A08G2073	Zm00001d010596	NA	Protein of unknown function (DUF640)	Protein of unknown function (DUF640)	N/A
1668	OG0000086	Gh_A10G0346	Zm00001d010596	NA	Protein of unknown function (DUF640)	Protein of unknown function (DUF640)	N/A
1669	OG0000086	Gh_A10G1370	Zm00001d010596	NA	Protein of unknown function (DUF640)	Protein of unknown function (DUF640)	N/A
1670	OG0000086	Gh_A13G2047	Zm00001d010596	NA	Protein of unknown function (DUF640)	Protein of unknown function (DUF640)	N/A
1671	OG0000086	Gh_D01G2334	Zm00001d010596	NA	Protein of unknown function (DUF640)	Protein of unknown function (DUF640)	N/A
1672	OG0000086	Gh_D03G1354	Zm00001d010596	Zm00001d012473	Protein of unknown function (DUF640)	Protein of unknown function (DUF640)	Protein of unknown function (DUF640)
1673	OG0000086	Gh_D03G1354	Zm00001d010596	Zm00001d043011	Protein of unknown function (DUF640)	Protein of unknown function (DUF640)	Protein of unknown function (DUF640)
1674	OG0000086	Gh_D05G1025	Zm00001d010596	NA	Protein of unknown function (DUF640)	Protein of unknown function (DUF640)	N/A
1675	OG0000086	Gh_D05G1470	Zm00001d010596	NA	Protein of unknown function (DUF640)	Protein of unknown function (DUF640)	N/A
1676	OG0000086	Gh_D05G3303	Zm00001d010596	NA	Protein of unknown function (DUF640)	Protein of unknown function (DUF640)	N/A
1677	OG0000086	Gh_D08G2656	Zm00001d010596	NA	Protein of unknown function (DUF640)	Protein of unknown function (DUF640)	N/A
1678	OG0000086	Gh_D10G0351	Zm00001d010596	NA	Protein of unknown function (DUF640)	Protein of unknown function (DUF640)	N/A
1679	OG0000086	Gh_D10G1100	Zm00001d010596	NA	Protein of unknown function (DUF640)	Protein of unknown function (DUF640)	N/A
1680	OG0000086	Gh_D11G2270	Zm00001d010596	NA	Protein of unknown function (DUF640)	Protein of unknown function (DUF640)	N/A
1681	OG0000086	Gh_Sca006817G01	Zm00001d010596	NA	Protein of unknown function (DUF640)	Protein of unknown function (DUF640)	N/A
1682	OG0000087	Gh_A11G0421	Zm00001d042204	NA	methyl esterase 10	methyl esterase 3	N/A
1683	OG0000087	Gh_A11G0422	Zm00001d042204	NA	methyl esterase 10	methyl esterase 3	N/A
1684	OG0000087	Gh_A11G1752	Zm00001d012603	Zm00001d043235	methyl esterase 1	methyl esterase 1	methyl esterase 1
1685	OG0000087	Gh_D11G1910	Zm00001d012603	Zm00001d043235	methyl esterase 1	methyl esterase 1	methyl esterase 1
1686	OG0000087	Gh_Sca013704G01	Zm00001d012603	NA	methyl esterase 3	methyl esterase 1	N/A
1687	OG0000089	Gh_A02G0789	Zm00001d047220	NA	Protein kinase superfamily protein	Protein kinase superfamily protein	N/A
1688	OG0000089	Gh_A05G1922	Zm00001d047220	Zm00001d047220	Protein kinase superfamily protein	Protein kinase superfamily protein	Protein kinase superfamily protein
1689	OG0000089	Gh_A05G1922	Zm00001d047220	Zm00001d022179	Protein kinase superfamily protein	Protein kinase superfamily protein	Protein kinase superfamily protein
1690	OG0000089	Gh_A05G1922	Zm00001d022179	Zm00001d047220	Protein kinase superfamily protein	Protein kinase superfamily protein	Protein kinase superfamily protein
1691	OG0000089	Gh_A08G1469	Zm00001d029975	NA	Protein kinase superfamily protein	Protein kinase superfamily protein	N/A
1692	OG0000089	Gh_A11G0474	Zm00001d047220	NA	Protein kinase superfamily protein	Protein kinase superfamily protein	N/A
1693	OG0000089	Gh_A11G0474	Zm00001d022179	NA	Protein kinase superfamily protein	Protein kinase superfamily protein	N/A
1694	OG0000089	Gh_A11G1858	Zm00001d047220	Zm00001d022179	Protein kinase superfamily protein	Protein kinase superfamily protein	Protein kinase superfamily protein
1695	OG0000089	Gh_A11G1858	Zm00001d047220	Zm00001d047220	Protein kinase superfamily protein	Protein kinase superfamily protein	Protein kinase superfamily protein
1696	OG0000089	Gh_A11G1858	Zm00001d022179	Zm00001d047220	Protein kinase superfamily protein	Protein kinase superfamily protein	Protein kinase superfamily protein
1697	OG0000089	Gh_D02G0839	Zm00001d047220	NA	Protein kinase superfamily protein	Protein kinase superfamily protein	N/A
1698	OG0000089	Gh_D05G2155	Zm00001d047220	Zm00001d022179	Protein kinase superfamily protein	Protein kinase superfamily protein	Protein kinase superfamily protein
1699	OG0000089	Gh_D05G2155	Zm00001d047220	Zm00001d047220	Protein kinase superfamily protein	Protein kinase superfamily protein	Protein kinase superfamily protein
1700	OG0000089	Gh_D05G2155	Zm00001d022179	Zm00001d047220	Protein kinase superfamily protein	Protein kinase superfamily protein	Protein kinase superfamily protein
1701	OG0000089	Gh_D08G1765	Zm00001d029975	Zm00001d029975	Protein kinase superfamily protein	Protein kinase superfamily protein	Protein kinase superfamily protein
1702	OG0000089	Gh_D11G0552	Zm00001d047220	Zm00001d022179	Protein kinase superfamily protein	Protein kinase superfamily protein	Protein kinase superfamily protein
1703	OG0000089	Gh_D11G0552	Zm00001d047220	Zm00001d047220	Protein kinase superfamily protein	Protein kinase superfamily protein	Protein kinase superfamily protein
1704	OG0000089	Gh_D11G0552	Zm00001d022179	Zm00001d047220	Protein kinase superfamily protein	Protein kinase superfamily protein	Protein kinase superfamily protein
1705	OG0000089	Gh_D11G2149	Zm00001d047220	Zm00001d022179	Protein kinase superfamily protein	Protein kinase superfamily protein	Protein kinase superfamily protein
1706	OG0000089	Gh_D11G2149	Zm00001d047220	Zm00001d047220	Protein kinase superfamily protein	Protein kinase superfamily protein	Protein kinase superfamily protein
1707	OG0000089	Gh_D11G2149	Zm00001d022179	Zm00001d047220	Protein kinase superfamily protein	Protein kinase superfamily protein	Protein kinase superfamily protein
1708	OG0000091	Gh_A01G0440	Zm00001d041791	NA	NAC (No Apical Meristem) domain transcriptional regulator superfamily protein	NAC (No Apical Meristem) domain transcriptional regulator superfamily protein	N/A
1709	OG0000091	Gh_A11G0290	Zm00001d016950	NA	NAC domain containing protein 100	NAC domain containing protein 100	N/A
1710	OG0000091	Gh_A11G0633	Zm00001d016950	NA	NAC domain containing protein 100	NAC domain containing protein 100	N/A
1711	OG0000091	Gh_A11G2580	Zm00001d041791	Zm00001d041472	NAC (No Apical Meristem) domain transcriptional regulator superfamily protein	NAC (No Apical Meristem) domain transcriptional regulator superfamily protein	NAC domain containing protein 1
1712	OG0000091	Gh_A12G1620	Zm00001d016950	NA	NAC domain containing protein 100	NAC domain containing protein 100	N/A
1713	OG0000091	Gh_A13G1259	Zm00001d041791	Zm00001d041472	NAC (No Apical Meristem) domain transcriptional regulator superfamily protein	NAC (No Apical Meristem) domain transcriptional regulator superfamily protein	NAC domain containing protein 1
1714	OG0000091	Gh_D01G0448	Zm00001d041791	NA	NAC (No Apical Meristem) domain transcriptional regulator superfamily protein	NAC (No Apical Meristem) domain transcriptional regulator superfamily protein	N/A
1715	OG0000091	Gh_D11G0347	Zm00001d016950	NA	NAC domain containing protein 100	NAC domain containing protein 100	N/A
1716	OG0000091	Gh_D11G0743	Zm00001d016950	NA	NAC domain containing protein 100	NAC domain containing protein 100	N/A
1717	OG0000091	Gh_D11G2947	Zm00001d041791	Zm00001d041472	NAC (No Apical Meristem) domain transcriptional regulator superfamily protein	NAC (No Apical Meristem) domain transcriptional regulator superfamily protein	NAC domain containing protein 1
1718	OG0000091	Gh_D12G1761	Zm00001d016950	NA	NAC domain containing protein 100	NAC domain containing protein 100	N/A
1719	OG0000091	Gh_D13G1561	Zm00001d041791	NA	NAC (No Apical Meristem) domain transcriptional regulator superfamily protein	NAC (No Apical Meristem) domain transcriptional regulator superfamily protein	N/A
1720	OG0000091	Gh_Sca057285G01	Zm00001d016950	NA	NAC domain containing protein 6	NAC domain containing protein 100	N/A
1721	OG0000093	Gh_A03G0887	Zm00001d023294	NA	NAC-like, activated by AP3/PI	NAC domain containing protein 47	N/A
1722	OG0000093	Gh_A11G2168	Zm00001d023294	NA	NAC domain containing protein 47	NAC domain containing protein 47	N/A
1723	OG0000093	Gh_A12G1505	Zm00001d023294	NA	NAC-like, activated by AP3/PI	NAC domain containing protein 47	N/A
1724	OG0000093	Gh_A13G1439	Zm00001d023294	NA	NAC domain containing protein 47	NAC domain containing protein 47	N/A
1725	OG0000093	Gh_D02G1270	Zm00001d023294	NA	NAC-like, activated by AP3/PI	NAC domain containing protein 47	N/A
1726	OG0000093	Gh_D11G2469	Zm00001d023294	NA	NAC domain containing protein 47	NAC domain containing protein 47	N/A
1727	OG0000093	Gh_D12G2767	Zm00001d023294	NA	NAC-like, activated by AP3/PI	NAC domain containing protein 47	N/A
1728	OG0000093	Gh_D13G1759	Zm00001d023294	NA	NAC domain containing protein 47	NAC domain containing protein 47	N/A
1729	OG0000094	Gh_A09G0031	Zm00001d020172	NA	Leucine-rich repeat transmembrane protein kinase	Leucine-rich repeat transmembrane protein kinase	N/A
1730	OG0000094	Gh_D09G0029	Zm00001d020172	NA	Leucine-rich repeat transmembrane protein kinase	Leucine-rich repeat transmembrane protein kinase	N/A
1731	OG0000100	Gh_A10G1594	Zm00001d044762	Zm00001d052827	S-adenosyl-L-methionine-dependent methyltransferases superfamily protein	S-adenosyl-L-methionine-dependent methyltransferases superfamily protein	S-adenosyl-L-methionine-dependent methyltransferases superfamily protein
1732	OG0000100	Gh_A10G1594	Zm00001d044762	Zm00001d052829	S-adenosyl-L-methionine-dependent methyltransferases superfamily protein	S-adenosyl-L-methionine-dependent methyltransferases superfamily protein	S-adenosyl-L-methionine-dependent methyltransferases superfamily protein
1733	OG0000100	Gh_A10G1598	Zm00001d044762	NA	S-adenosyl-L-methionine-dependent methyltransferases superfamily protein	S-adenosyl-L-methionine-dependent methyltransferases superfamily protein	N/A
1734	OG0000100	Gh_A10G1600	Zm00001d044762	NA	S-adenosyl-L-methionine-dependent methyltransferases superfamily protein	S-adenosyl-L-methionine-dependent methyltransferases superfamily protein	N/A
1735	OG0000100	Gh_A12G0583	Zm00001d044762	NA	S-adenosyl-L-methionine-dependent methyltransferases superfamily protein	S-adenosyl-L-methionine-dependent methyltransferases superfamily protein	N/A
1736	OG0000100	Gh_A12G0584	Zm00001d044762	NA	S-adenosyl-L-methionine-dependent methyltransferases superfamily protein	S-adenosyl-L-methionine-dependent methyltransferases superfamily protein	N/A
1737	OG0000100	Gh_A13G1848	Zm00001d044762	NA	S-adenosyl-L-methionine-dependent methyltransferases superfamily protein	S-adenosyl-L-methionine-dependent methyltransferases superfamily protein	N/A
1738	OG0000100	Gh_D09G0289	Zm00001d044762	NA	S-adenosyl-L-methionine-dependent methyltransferases superfamily protein	S-adenosyl-L-methionine-dependent methyltransferases superfamily protein	N/A
1739	OG0000100	Gh_D09G0290	Zm00001d044762	NA	S-adenosyl-L-methionine-dependent methyltransferases superfamily protein	S-adenosyl-L-methionine-dependent methyltransferases superfamily protein	N/A
1740	OG0000100	Gh_D10G1851	Zm00001d044762	NA	S-adenosyl-L-methionine-dependent methyltransferases superfamily protein	S-adenosyl-L-methionine-dependent methyltransferases superfamily protein	N/A
1741	OG0000100	Gh_D10G1855	Zm00001d044762	NA	S-adenosyl-L-methionine-dependent methyltransferases superfamily protein	S-adenosyl-L-methionine-dependent methyltransferases superfamily protein	N/A
1742	OG0000100	Gh_D10G1857	Zm00001d044762	NA	S-adenosyl-L-methionine-dependent methyltransferases superfamily protein	S-adenosyl-L-methionine-dependent methyltransferases superfamily protein	N/A
1743	OG0000100	Gh_D12G0595	Zm00001d044762	Zm00001d015220	S-adenosyl-L-methionine-dependent methyltransferases superfamily protein	S-adenosyl-L-methionine-dependent methyltransferases superfamily protein	jasmonic acid carboxyl methyltransferase
1744	OG0000100	Gh_D12G0595	Zm00001d044762	Zm00001d044763	S-adenosyl-L-methionine-dependent methyltransferases superfamily protein	S-adenosyl-L-methionine-dependent methyltransferases superfamily protein	S-adenosyl-L-methionine-dependent methyltransferases superfamily protein
1745	OG0000100	Gh_D13G2236	Zm00001d044762	Zm00001d052827	S-adenosyl-L-methionine-dependent methyltransferases superfamily protein	S-adenosyl-L-methionine-dependent methyltransferases superfamily protein	S-adenosyl-L-methionine-dependent methyltransferases superfamily protein
1746	OG0000100	Gh_D13G2236	Zm00001d044762	Zm00001d052829	S-adenosyl-L-methionine-dependent methyltransferases superfamily protein	S-adenosyl-L-methionine-dependent methyltransferases superfamily protein	S-adenosyl-L-methionine-dependent methyltransferases superfamily protein
1747	OG0000100	Gh_Sca019596G01	Zm00001d044762	NA	S-adenosyl-L-methionine-dependent methyltransferases superfamily protein	S-adenosyl-L-methionine-dependent methyltransferases superfamily protein	N/A
1748	OG0000103	Gh_A04G0815	Zm00001d052042	Zm00001d034925	HXXXD-type acyl-transferase family protein	HXXXD-type acyl-transferase family protein	HXXXD-type acyl-transferase family protein
1749	OG0000103	Gh_A04G0815	Zm00001d052042	Zm00001d051892	HXXXD-type acyl-transferase family protein	HXXXD-type acyl-transferase family protein	HXXXD-type acyl-transferase family protein
1750	OG0000103	Gh_A04G0815	Zm00001d052042	Zm00001d014530	HXXXD-type acyl-transferase family protein	HXXXD-type acyl-transferase family protein	HXXXD-type acyl-transferase family protein
1751	OG0000103	Gh_A06G0443	Zm00001d052042	NA	HXXXD-type acyl-transferase family protein	HXXXD-type acyl-transferase family protein	N/A
1752	OG0000103	Gh_A06G0444	Zm00001d052042	NA	HXXXD-type acyl-transferase family protein	HXXXD-type acyl-transferase family protein	N/A
1753	OG0000103	Gh_A07G2056	Zm00001d052042	NA	HXXXD-type acyl-transferase family protein	HXXXD-type acyl-transferase family protein	N/A
1754	OG0000103	Gh_A08G1314	Zm00001d052042	NA	HXXXD-type acyl-transferase family protein	HXXXD-type acyl-transferase family protein	N/A
1755	OG0000103	Gh_A08G1315	Zm00001d052042	NA	HXXXD-type acyl-transferase family protein	HXXXD-type acyl-transferase family protein	N/A
1756	OG0000103	Gh_A08G1316	Zm00001d052042	NA	HXXXD-type acyl-transferase family protein	HXXXD-type acyl-transferase family protein	N/A
1757	OG0000103	Gh_A10G1259	Zm00001d052042	NA	HXXXD-type acyl-transferase family protein	HXXXD-type acyl-transferase family protein	N/A
1758	OG0000103	Gh_A11G0660	Zm00001d052042	Zm00001d034925	HXXXD-type acyl-transferase family protein	HXXXD-type acyl-transferase family protein	HXXXD-type acyl-transferase family protein
1759	OG0000103	Gh_A11G0660	Zm00001d052042	Zm00001d051892	HXXXD-type acyl-transferase family protein	HXXXD-type acyl-transferase family protein	HXXXD-type acyl-transferase family protein
1760	OG0000103	Gh_A11G0660	Zm00001d052042	Zm00001d014530	HXXXD-type acyl-transferase family protein	HXXXD-type acyl-transferase family protein	HXXXD-type acyl-transferase family protein
1761	OG0000103	Gh_A11G0661	Zm00001d052042	Zm00001d034925	HXXXD-type acyl-transferase family protein	HXXXD-type acyl-transferase family protein	HXXXD-type acyl-transferase family protein
1762	OG0000103	Gh_A11G0661	Zm00001d052042	Zm00001d051892	HXXXD-type acyl-transferase family protein	HXXXD-type acyl-transferase family protein	HXXXD-type acyl-transferase family protein
1763	OG0000103	Gh_A11G0661	Zm00001d052042	Zm00001d014530	HXXXD-type acyl-transferase family protein	HXXXD-type acyl-transferase family protein	HXXXD-type acyl-transferase family protein
1764	OG0000103	Gh_A12G1246	Zm00001d052042	NA	HXXXD-type acyl-transferase family protein	HXXXD-type acyl-transferase family protein	N/A
1765	OG0000103	Gh_A12G1249	Zm00001d052042	NA	HXXXD-type acyl-transferase family protein	HXXXD-type acyl-transferase family protein	N/A
1766	OG0000103	Gh_A13G0399	Zm00001d052042	NA	HXXXD-type acyl-transferase family protein	HXXXD-type acyl-transferase family protein	N/A
1767	OG0000103	Gh_D06G0483	Zm00001d052042	Zm00001d034925	HXXXD-type acyl-transferase family protein	HXXXD-type acyl-transferase family protein	HXXXD-type acyl-transferase family protein
1768	OG0000103	Gh_D06G0483	Zm00001d052042	Zm00001d051892	HXXXD-type acyl-transferase family protein	HXXXD-type acyl-transferase family protein	HXXXD-type acyl-transferase family protein
1769	OG0000103	Gh_D06G0483	Zm00001d052042	Zm00001d014530	HXXXD-type acyl-transferase family protein	HXXXD-type acyl-transferase family protein	HXXXD-type acyl-transferase family protein
1770	OG0000103	Gh_D06G0484	Zm00001d052042	NA	HXXXD-type acyl-transferase family protein	HXXXD-type acyl-transferase family protein	N/A
1771	OG0000103	Gh_D07G2268	Zm00001d052042	NA	HXXXD-type acyl-transferase family protein	HXXXD-type acyl-transferase family protein	N/A
1772	OG0000103	Gh_D07G2269	Zm00001d052042	NA	HXXXD-type acyl-transferase family protein	HXXXD-type acyl-transferase family protein	N/A
1773	OG0000103	Gh_D07G2271	Zm00001d052042	NA	HXXXD-type acyl-transferase family protein	HXXXD-type acyl-transferase family protein	N/A
1774	OG0000103	Gh_D08G1606	Zm00001d052042	NA	HXXXD-type acyl-transferase family protein	HXXXD-type acyl-transferase family protein	N/A
1775	OG0000103	Gh_D10G1226	Zm00001d052042	NA	HXXXD-type acyl-transferase family protein	HXXXD-type acyl-transferase family protein	N/A
1776	OG0000103	Gh_D11G0773	Zm00001d052042	Zm00001d034925	HXXXD-type acyl-transferase family protein	HXXXD-type acyl-transferase family protein	HXXXD-type acyl-transferase family protein
1777	OG0000103	Gh_D11G0773	Zm00001d052042	Zm00001d051892	HXXXD-type acyl-transferase family protein	HXXXD-type acyl-transferase family protein	HXXXD-type acyl-transferase family protein
1778	OG0000103	Gh_D11G0773	Zm00001d052042	Zm00001d014530	HXXXD-type acyl-transferase family protein	HXXXD-type acyl-transferase family protein	HXXXD-type acyl-transferase family protein
1779	OG0000103	Gh_D11G0774	Zm00001d052042	Zm00001d034925	HXXXD-type acyl-transferase family protein	HXXXD-type acyl-transferase family protein	HXXXD-type acyl-transferase family protein
1780	OG0000103	Gh_D11G0774	Zm00001d052042	Zm00001d051892	HXXXD-type acyl-transferase family protein	HXXXD-type acyl-transferase family protein	HXXXD-type acyl-transferase family protein
1781	OG0000103	Gh_D11G0774	Zm00001d052042	Zm00001d014530	HXXXD-type acyl-transferase family protein	HXXXD-type acyl-transferase family protein	HXXXD-type acyl-transferase family protein
1782	OG0000103	Gh_D12G1374	Zm00001d052042	NA	HXXXD-type acyl-transferase family protein	HXXXD-type acyl-transferase family protein	N/A
1783	OG0000103	Gh_D12G1376	Zm00001d052042	NA	HXXXD-type acyl-transferase family protein	HXXXD-type acyl-transferase family protein	N/A
1784	OG0000103	Gh_D13G2547	Zm00001d052042	NA	HXXXD-type acyl-transferase family protein	HXXXD-type acyl-transferase family protein	N/A
1785	OG0000107	Gh_A05G2791	Zm00001d029620	NA	UDP-glucosyl transferase 74B1	Uridine diphosphate glycosyltransferase 74E2	N/A
1786	OG0000107	Gh_D01G1313	Zm00001d029620	NA	UDP-glucosyl transferase 74B1	Uridine diphosphate glycosyltransferase 74E2	N/A
1787	OG0000107	Gh_D03G1441	Zm00001d029620	NA	UDP-glucosyltransferase 74F2	Uridine diphosphate glycosyltransferase 74E2	N/A
1788	OG0000107	Gh_D05G3096	Zm00001d029620	NA	UDP-glucosyl transferase 74B1	Uridine diphosphate glycosyltransferase 74E2	N/A
1789	OG0000107	Gh_D10G1560	Zm00001d029620	NA	UDP-glucosyl transferase 74B1	Uridine diphosphate glycosyltransferase 74E2	N/A
1790	OG0000107	Gh_Sca004909G03	Zm00001d029620	NA	UDP-glucosyltransferase 74F2	Uridine diphosphate glycosyltransferase 74E2	N/A
1791	OG0000109	Gh_A02G0274	Zm00001d004424	Zm00001d024937	Protein of unknown function (DUF594)	Protein of unknown function (DUF594)	Protein of unknown function (DUF594)
1792	OG0000109	Gh_A02G0274	Zm00001d004424	Zm00001d004547	Protein of unknown function (DUF594)	Protein of unknown function (DUF594)	Protein of unknown function (DUF594)
1793	OG0000109	Gh_A02G0274	Zm00001d004423	Zm00001d024937	Protein of unknown function (DUF594)	Protein of unknown function (DUF594)	Protein of unknown function (DUF594)
1794	OG0000109	Gh_A02G0274	Zm00001d004423	Zm00001d004547	Protein of unknown function (DUF594)	Protein of unknown function (DUF594)	Protein of unknown function (DUF594)
1795	OG0000109	Gh_A02G0274	Zm00001d024867	Zm00001d024937	Protein of unknown function (DUF594)	Protein of unknown function (DUF594)	Protein of unknown function (DUF594)
1796	OG0000109	Gh_A02G0274	Zm00001d024867	Zm00001d004547	Protein of unknown function (DUF594)	Protein of unknown function (DUF594)	Protein of unknown function (DUF594)
1797	OG0000109	Gh_A02G0274	Zm00001d024937	Zm00001d024937	Protein of unknown function (DUF594)	Protein of unknown function (DUF594)	Protein of unknown function (DUF594)
1798	OG0000109	Gh_A02G0274	Zm00001d024937	Zm00001d004547	Protein of unknown function (DUF594)	Protein of unknown function (DUF594)	Protein of unknown function (DUF594)
1799	OG0000109	Gh_A02G0274	Zm00001d024937	Zm00001d008849	Protein of unknown function (DUF594)	Protein of unknown function (DUF594)	Protein of unknown function (DUF594)
1800	OG0000109	Gh_A02G0274	Zm00001d004547	Zm00001d024937	Protein of unknown function (DUF594)	Protein of unknown function (DUF594)	Protein of unknown function (DUF594)
1801	OG0000109	Gh_A02G0274	Zm00001d004547	Zm00001d004547	Protein of unknown function (DUF594)	Protein of unknown function (DUF594)	Protein of unknown function (DUF594)
1802	OG0000109	Gh_A02G0274	Zm00001d004547	Zm00001d008849	Protein of unknown function (DUF594)	Protein of unknown function (DUF594)	Protein of unknown function (DUF594)
1803	OG0000109	Gh_A02G0275	Zm00001d024937	NA	Protein of unknown function (DUF594)	Protein of unknown function (DUF594)	N/A
1804	OG0000109	Gh_A02G0275	Zm00001d004547	NA	Protein of unknown function (DUF594)	Protein of unknown function (DUF594)	N/A
1805	OG0000109	Gh_A03G1842	Zm00001d024937	NA	Protein of unknown function (DUF594)	Protein of unknown function (DUF594)	N/A
1806	OG0000109	Gh_A03G1842	Zm00001d004547	NA	Protein of unknown function (DUF594)	Protein of unknown function (DUF594)	N/A
1807	OG0000109	Gh_A03G2185	Zm00001d024937	Zm00001d027606	Protein of unknown function (DUF594)	Protein of unknown function (DUF594)	Protein of unknown function (DUF594)
1808	OG0000109	Gh_A03G2185	Zm00001d004547	Zm00001d027606	Protein of unknown function (DUF594)	Protein of unknown function (DUF594)	Protein of unknown function (DUF594)
1809	OG0000109	Gh_A05G1062	Zm00001d004424	Zm00001d024937	Protein of unknown function (DUF594)	Protein of unknown function (DUF594)	Protein of unknown function (DUF594)
1810	OG0000109	Gh_A05G1062	Zm00001d004424	Zm00001d004547	Protein of unknown function (DUF594)	Protein of unknown function (DUF594)	Protein of unknown function (DUF594)
1811	OG0000109	Gh_A05G1062	Zm00001d004423	Zm00001d024937	Protein of unknown function (DUF594)	Protein of unknown function (DUF594)	Protein of unknown function (DUF594)
1812	OG0000109	Gh_A05G1062	Zm00001d004423	Zm00001d004547	Protein of unknown function (DUF594)	Protein of unknown function (DUF594)	Protein of unknown function (DUF594)
1813	OG0000109	Gh_A05G1062	Zm00001d024867	Zm00001d024937	Protein of unknown function (DUF594)	Protein of unknown function (DUF594)	Protein of unknown function (DUF594)
1814	OG0000109	Gh_A05G1062	Zm00001d024867	Zm00001d004547	Protein of unknown function (DUF594)	Protein of unknown function (DUF594)	Protein of unknown function (DUF594)
1815	OG0000109	Gh_A05G1062	Zm00001d024937	Zm00001d024937	Protein of unknown function (DUF594)	Protein of unknown function (DUF594)	Protein of unknown function (DUF594)
1816	OG0000109	Gh_A05G1062	Zm00001d024937	Zm00001d004547	Protein of unknown function (DUF594)	Protein of unknown function (DUF594)	Protein of unknown function (DUF594)
1817	OG0000109	Gh_A05G1062	Zm00001d024937	Zm00001d008849	Protein of unknown function (DUF594)	Protein of unknown function (DUF594)	Protein of unknown function (DUF594)
1818	OG0000109	Gh_A05G1062	Zm00001d004547	Zm00001d024937	Protein of unknown function (DUF594)	Protein of unknown function (DUF594)	Protein of unknown function (DUF594)
1819	OG0000109	Gh_A05G1062	Zm00001d004547	Zm00001d004547	Protein of unknown function (DUF594)	Protein of unknown function (DUF594)	Protein of unknown function (DUF594)
1820	OG0000109	Gh_A05G1062	Zm00001d004547	Zm00001d008849	Protein of unknown function (DUF594)	Protein of unknown function (DUF594)	Protein of unknown function (DUF594)
1821	OG0000109	Gh_A05G3197	Zm00001d024937	NA	Protein of unknown function (DUF594)	Protein of unknown function (DUF594)	N/A
1822	OG0000109	Gh_A05G3197	Zm00001d004547	NA	Protein of unknown function (DUF594)	Protein of unknown function (DUF594)	N/A
1823	OG0000109	Gh_A09G0112	Zm00001d024937	NA	Protein of unknown function (DUF594)	Protein of unknown function (DUF594)	N/A
1824	OG0000109	Gh_A09G0112	Zm00001d004547	NA	Protein of unknown function (DUF594)	Protein of unknown function (DUF594)	N/A
1825	OG0000109	Gh_D02G0339	Zm00001d004424	Zm00001d004547	Protein of unknown function (DUF594)	Protein of unknown function (DUF594)	Protein of unknown function (DUF594)
1826	OG0000109	Gh_D02G0339	Zm00001d004424	Zm00001d024937	Protein of unknown function (DUF594)	Protein of unknown function (DUF594)	Protein of unknown function (DUF594)
1827	OG0000109	Gh_D02G0339	Zm00001d004423	Zm00001d004547	Protein of unknown function (DUF594)	Protein of unknown function (DUF594)	Protein of unknown function (DUF594)
1828	OG0000109	Gh_D02G0339	Zm00001d004423	Zm00001d024937	Protein of unknown function (DUF594)	Protein of unknown function (DUF594)	Protein of unknown function (DUF594)
1829	OG0000109	Gh_D02G0339	Zm00001d024867	Zm00001d004547	Protein of unknown function (DUF594)	Protein of unknown function (DUF594)	Protein of unknown function (DUF594)
1830	OG0000109	Gh_D02G0339	Zm00001d024867	Zm00001d024937	Protein of unknown function (DUF594)	Protein of unknown function (DUF594)	Protein of unknown function (DUF594)
1831	OG0000109	Gh_D02G0339	Zm00001d024937	Zm00001d004547	Protein of unknown function (DUF594)	Protein of unknown function (DUF594)	Protein of unknown function (DUF594)
1832	OG0000109	Gh_D02G0339	Zm00001d024937	Zm00001d024937	Protein of unknown function (DUF594)	Protein of unknown function (DUF594)	Protein of unknown function (DUF594)
1833	OG0000109	Gh_D02G0339	Zm00001d024937	Zm00001d008849	Protein of unknown function (DUF594)	Protein of unknown function (DUF594)	Protein of unknown function (DUF594)
1834	OG0000109	Gh_D02G0339	Zm00001d004547	Zm00001d004547	Protein of unknown function (DUF594)	Protein of unknown function (DUF594)	Protein of unknown function (DUF594)
1835	OG0000109	Gh_D02G0339	Zm00001d004547	Zm00001d024937	Protein of unknown function (DUF594)	Protein of unknown function (DUF594)	Protein of unknown function (DUF594)
1836	OG0000109	Gh_D02G0339	Zm00001d004547	Zm00001d008849	Protein of unknown function (DUF594)	Protein of unknown function (DUF594)	Protein of unknown function (DUF594)
1837	OG0000109	Gh_D02G0340	Zm00001d024937	NA	Protein of unknown function (DUF594)	Protein of unknown function (DUF594)	N/A
1838	OG0000109	Gh_D02G0340	Zm00001d004547	NA	Protein of unknown function (DUF594)	Protein of unknown function (DUF594)	N/A
1839	OG0000109	Gh_D02G2281	Zm00001d024937	NA	Protein of unknown function (DUF594)	Protein of unknown function (DUF594)	N/A
1840	OG0000109	Gh_D02G2281	Zm00001d004547	NA	Protein of unknown function (DUF594)	Protein of unknown function (DUF594)	N/A
1841	OG0000109	Gh_D02G2282	Zm00001d024937	NA	Protein of unknown function (DUF594)	Protein of unknown function (DUF594)	N/A
1842	OG0000109	Gh_D02G2282	Zm00001d004547	NA	Protein of unknown function (DUF594)	Protein of unknown function (DUF594)	N/A
1843	OG0000109	Gh_D04G0408	Zm00001d024937	NA	Protein of unknown function (DUF594)	Protein of unknown function (DUF594)	N/A
1844	OG0000109	Gh_D04G0408	Zm00001d004547	NA	Protein of unknown function (DUF594)	Protein of unknown function (DUF594)	N/A
1845	OG0000109	Gh_D05G1210	Zm00001d024937	Zm00001d044320	Protein of unknown function (DUF594)	Protein of unknown function (DUF594)	Protein of unknown function (DUF594)
1846	OG0000109	Gh_D05G1210	Zm00001d004547	Zm00001d044320	Protein of unknown function (DUF594)	Protein of unknown function (DUF594)	Protein of unknown function (DUF594)
1847	OG0000109	Gh_D09G0108	Zm00001d024937	NA	Protein of unknown function (DUF594)	Protein of unknown function (DUF594)	N/A
1848	OG0000109	Gh_D09G0108	Zm00001d004547	NA	Protein of unknown function (DUF594)	Protein of unknown function (DUF594)	N/A
1849	OG0000110	Gh_A09G1569	Zm00001d033791	Zm00001d033791	homeobox protein 33	homeobox protein 33	homeobox protein 33
1850	OG0000110	Gh_A09G1569	Zm00001d033791	Zm00001d013409	homeobox protein 33	homeobox protein 33	homeobox protein 33
1851	OG0000110	Gh_A09G1569	Zm00001d013409	Zm00001d033791	homeobox protein 33	homeobox protein 33	homeobox protein 33
1852	OG0000110	Gh_A09G1569	Zm00001d013409	Zm00001d013409	homeobox protein 33	homeobox protein 33	homeobox protein 33
1853	OG0000110	Gh_D09G1640	Zm00001d033791	Zm00001d033791	homeobox protein 33	homeobox protein 33	homeobox protein 33
1854	OG0000110	Gh_D09G1640	Zm00001d033791	Zm00001d013409	homeobox protein 33	homeobox protein 33	homeobox protein 33
1855	OG0000110	Gh_D09G1640	Zm00001d013409	Zm00001d033791	homeobox protein 33	homeobox protein 33	homeobox protein 33
1856	OG0000110	Gh_D09G1640	Zm00001d013409	Zm00001d013409	homeobox protein 33	homeobox protein 33	homeobox protein 33
1857	OG0000110	Gh_Sca068050G01	Zm00001d033791	Zm00001d013409	homeobox protein 33	homeobox protein 33	homeobox protein 33
1858	OG0000110	Gh_Sca068050G01	Zm00001d033791	Zm00001d033791	homeobox protein 33	homeobox protein 33	homeobox protein 33
1859	OG0000110	Gh_Sca068050G01	Zm00001d013409	Zm00001d013409	homeobox protein 33	homeobox protein 33	homeobox protein 33
1860	OG0000110	Gh_Sca068050G01	Zm00001d013409	Zm00001d033791	homeobox protein 33	homeobox protein 33	homeobox protein 33
1861	OG0000112	Gh_A09G2270	Zm00001d001913	Zm00001d043998	ubiquitin-conjugating enzyme 10	ubiquitin-conjugating enzyme 28	ubiquitin conjugating enzyme 9
1862	OG0000112	Gh_D09G2059	Zm00001d001913	Zm00001d043998	ubiquitin-conjugating enzyme 10	ubiquitin-conjugating enzyme 28	ubiquitin conjugating enzyme 9
1863	OG0000114	Gh_A12G1863	Zm00001d028419	Zm00001d030372	cytochrome P450, family 76, subfamily C, polypeptide 4	cytochrome P450, family 76, subfamily C, polypeptide 1	cytochrome P450, family 76, subfamily C, polypeptide 1
1864	OG0000114	Gh_A12G1863	Zm00001d028419	Zm00001d013830	cytochrome P450, family 76, subfamily C, polypeptide 4	cytochrome P450, family 76, subfamily C, polypeptide 1	cytochrome P450, family 76, subfamily C, polypeptide 2
1865	OG0000114	Gh_A12G1864	Zm00001d028419	Zm00001d013830	cytochrome P450, family 76, subfamily C, polypeptide 4	cytochrome P450, family 76, subfamily C, polypeptide 1	cytochrome P450, family 76, subfamily C, polypeptide 2
1866	OG0000114	Gh_A12G1864	Zm00001d028419	Zm00001d030372	cytochrome P450, family 76, subfamily C, polypeptide 4	cytochrome P450, family 76, subfamily C, polypeptide 1	cytochrome P450, family 76, subfamily C, polypeptide 1
1867	OG0000114	Gh_D12G2034	Zm00001d028419	Zm00001d020673	cytochrome P450, family 76, subfamily C, polypeptide 4	cytochrome P450, family 76, subfamily C, polypeptide 1	cytochrome P450, family 76, subfamily C, polypeptide 2
1868	OG0000114	Gh_D12G2036	Zm00001d028419	Zm00001d030372	cytochrome P450, family 76, subfamily C, polypeptide 4	cytochrome P450, family 76, subfamily C, polypeptide 1	cytochrome P450, family 76, subfamily C, polypeptide 1
1869	OG0000114	Gh_D12G2036	Zm00001d028419	Zm00001d013830	cytochrome P450, family 76, subfamily C, polypeptide 4	cytochrome P450, family 76, subfamily C, polypeptide 1	cytochrome P450, family 76, subfamily C, polypeptide 2
1870	OG0000115	Gh_A03G1505	Zm00001d051502	Zm00001d026018	Calcium-dependent protein kinase family protein	Calcium-dependent protein kinase family protein	calmodulin-domain protein kinase 5
1871	OG0000115	Gh_A03G1505	Zm00001d051502	Zm00001d002540	Calcium-dependent protein kinase family protein	Calcium-dependent protein kinase family protein	calmodulin-domain protein kinase 5
1872	OG0000115	Gh_A03G1505	Zm00001d026018	Zm00001d026018	Calcium-dependent protein kinase family protein	calmodulin-domain protein kinase 5	calmodulin-domain protein kinase 5
1873	OG0000115	Gh_A03G1505	Zm00001d026018	Zm00001d002540	Calcium-dependent protein kinase family protein	calmodulin-domain protein kinase 5	calmodulin-domain protein kinase 5
1874	OG0000115	Gh_A03G1505	Zm00001d002540	Zm00001d026018	Calcium-dependent protein kinase family protein	calmodulin-domain protein kinase 5	calmodulin-domain protein kinase 5
1875	OG0000115	Gh_A03G1505	Zm00001d002540	Zm00001d002540	Calcium-dependent protein kinase family protein	calmodulin-domain protein kinase 5	calmodulin-domain protein kinase 5
1876	OG0000115	Gh_A04G1429	Zm00001d026018	NA	Calcium-dependent protein kinase family protein	calmodulin-domain protein kinase 5	N/A
1877	OG0000115	Gh_A04G1429	Zm00001d002540	NA	Calcium-dependent protein kinase family protein	calmodulin-domain protein kinase 5	N/A
1878	OG0000115	Gh_A12G0109	Zm00001d051502	Zm00001d026018	Calcium-dependent protein kinase family protein	Calcium-dependent protein kinase family protein	calmodulin-domain protein kinase 5
1879	OG0000115	Gh_A12G0109	Zm00001d051502	Zm00001d002540	Calcium-dependent protein kinase family protein	Calcium-dependent protein kinase family protein	calmodulin-domain protein kinase 5
1880	OG0000115	Gh_A12G0109	Zm00001d026018	Zm00001d026018	Calcium-dependent protein kinase family protein	calmodulin-domain protein kinase 5	calmodulin-domain protein kinase 5
1881	OG0000115	Gh_A12G0109	Zm00001d026018	Zm00001d002540	Calcium-dependent protein kinase family protein	calmodulin-domain protein kinase 5	calmodulin-domain protein kinase 5
1882	OG0000115	Gh_A12G0109	Zm00001d002540	Zm00001d026018	Calcium-dependent protein kinase family protein	calmodulin-domain protein kinase 5	calmodulin-domain protein kinase 5
1883	OG0000115	Gh_A12G0109	Zm00001d002540	Zm00001d002540	Calcium-dependent protein kinase family protein	calmodulin-domain protein kinase 5	calmodulin-domain protein kinase 5
1884	OG0000115	Gh_A13G0563	Zm00001d026018	NA	Calcium-dependent protein kinase family protein	calmodulin-domain protein kinase 5	N/A
1885	OG0000115	Gh_A13G0563	Zm00001d002540	NA	Calcium-dependent protein kinase family protein	calmodulin-domain protein kinase 5	N/A
1886	OG0000115	Gh_A13G0566	Zm00001d051502	Zm00001d026018	Calcium-dependent protein kinase family protein	Calcium-dependent protein kinase family protein	calmodulin-domain protein kinase 5
1887	OG0000115	Gh_A13G0566	Zm00001d051502	Zm00001d002540	Calcium-dependent protein kinase family protein	Calcium-dependent protein kinase family protein	calmodulin-domain protein kinase 5
1888	OG0000115	Gh_A13G0566	Zm00001d026018	Zm00001d026018	Calcium-dependent protein kinase family protein	calmodulin-domain protein kinase 5	calmodulin-domain protein kinase 5
1889	OG0000115	Gh_A13G0566	Zm00001d026018	Zm00001d002540	Calcium-dependent protein kinase family protein	calmodulin-domain protein kinase 5	calmodulin-domain protein kinase 5
1890	OG0000115	Gh_A13G0566	Zm00001d002540	Zm00001d026018	Calcium-dependent protein kinase family protein	calmodulin-domain protein kinase 5	calmodulin-domain protein kinase 5
1891	OG0000115	Gh_A13G0566	Zm00001d002540	Zm00001d002540	Calcium-dependent protein kinase family protein	calmodulin-domain protein kinase 5	calmodulin-domain protein kinase 5
1892	OG0000115	Gh_D02G1973	Zm00001d051502	Zm00001d026018	Calcium-dependent protein kinase family protein	Calcium-dependent protein kinase family protein	calmodulin-domain protein kinase 5
1893	OG0000115	Gh_D02G1973	Zm00001d051502	Zm00001d002540	Calcium-dependent protein kinase family protein	Calcium-dependent protein kinase family protein	calmodulin-domain protein kinase 5
1894	OG0000115	Gh_D02G1973	Zm00001d026018	Zm00001d026018	Calcium-dependent protein kinase family protein	calmodulin-domain protein kinase 5	calmodulin-domain protein kinase 5
1895	OG0000115	Gh_D02G1973	Zm00001d026018	Zm00001d002540	Calcium-dependent protein kinase family protein	calmodulin-domain protein kinase 5	calmodulin-domain protein kinase 5
1896	OG0000115	Gh_D02G1973	Zm00001d002540	Zm00001d026018	Calcium-dependent protein kinase family protein	calmodulin-domain protein kinase 5	calmodulin-domain protein kinase 5
1897	OG0000115	Gh_D02G1973	Zm00001d002540	Zm00001d002540	Calcium-dependent protein kinase family protein	calmodulin-domain protein kinase 5	calmodulin-domain protein kinase 5
1898	OG0000115	Gh_D04G1486	Zm00001d026018	NA	Calcium-dependent protein kinase family protein	calmodulin-domain protein kinase 5	N/A
1899	OG0000115	Gh_D04G1486	Zm00001d002540	NA	Calcium-dependent protein kinase family protein	calmodulin-domain protein kinase 5	N/A
1900	OG0000115	Gh_D12G0121	Zm00001d051502	Zm00001d026018	Calcium-dependent protein kinase family protein	Calcium-dependent protein kinase family protein	calmodulin-domain protein kinase 5
1901	OG0000115	Gh_D12G0121	Zm00001d051502	Zm00001d002540	Calcium-dependent protein kinase family protein	Calcium-dependent protein kinase family protein	calmodulin-domain protein kinase 5
1902	OG0000115	Gh_D12G0121	Zm00001d026018	Zm00001d026018	Calcium-dependent protein kinase family protein	calmodulin-domain protein kinase 5	calmodulin-domain protein kinase 5
1903	OG0000115	Gh_D12G0121	Zm00001d026018	Zm00001d002540	Calcium-dependent protein kinase family protein	calmodulin-domain protein kinase 5	calmodulin-domain protein kinase 5
1904	OG0000115	Gh_D12G0121	Zm00001d002540	Zm00001d026018	Calcium-dependent protein kinase family protein	calmodulin-domain protein kinase 5	calmodulin-domain protein kinase 5
1905	OG0000115	Gh_D12G0121	Zm00001d002540	Zm00001d002540	Calcium-dependent protein kinase family protein	calmodulin-domain protein kinase 5	calmodulin-domain protein kinase 5
1906	OG0000115	Gh_D13G0560	Zm00001d026018	NA	Calcium-dependent protein kinase family protein	calmodulin-domain protein kinase 5	N/A
1907	OG0000115	Gh_D13G0560	Zm00001d002540	NA	Calcium-dependent protein kinase family protein	calmodulin-domain protein kinase 5	N/A
1908	OG0000115	Gh_D13G0561	Zm00001d051502	Zm00001d026018	Calcium-dependent protein kinase family protein	Calcium-dependent protein kinase family protein	calmodulin-domain protein kinase 5
1909	OG0000115	Gh_D13G0561	Zm00001d051502	Zm00001d002540	Calcium-dependent protein kinase family protein	Calcium-dependent protein kinase family protein	calmodulin-domain protein kinase 5
1910	OG0000115	Gh_D13G0561	Zm00001d026018	Zm00001d026018	Calcium-dependent protein kinase family protein	calmodulin-domain protein kinase 5	calmodulin-domain protein kinase 5
1911	OG0000115	Gh_D13G0561	Zm00001d026018	Zm00001d002540	Calcium-dependent protein kinase family protein	calmodulin-domain protein kinase 5	calmodulin-domain protein kinase 5
1912	OG0000115	Gh_D13G0561	Zm00001d002540	Zm00001d026018	Calcium-dependent protein kinase family protein	calmodulin-domain protein kinase 5	calmodulin-domain protein kinase 5
1913	OG0000115	Gh_D13G0561	Zm00001d002540	Zm00001d002540	Calcium-dependent protein kinase family protein	calmodulin-domain protein kinase 5	calmodulin-domain protein kinase 5
1914	OG0000118	Gh_D06G0967	Zm00001d010785	Zm00001d038801	GATA transcription factor 12	GATA transcription factor 12	GATA transcription factor 12
1915	OG0000118	Gh_D06G0967	Zm00001d038801	Zm00001d038801	GATA transcription factor 12	GATA transcription factor 12	GATA transcription factor 12
1916	OG0000118	Gh_D06G0967	Zm00001d012757	Zm00001d038801	GATA transcription factor 12	GATA transcription factor 9	GATA transcription factor 12
1917	OG0000119	Gh_D07G0265	Zm00001d050422	Zm00001d020497	SOS3-interacting protein 3	SOS3-interacting protein 3	SOS3-interacting protein 3
1918	OG0000119	Gh_D07G0265	Zm00001d050422	Zm00001d032155	SOS3-interacting protein 3	SOS3-interacting protein 3	SOS3-interacting protein 3
1919	OG0000119	Gh_D07G0265	Zm00001d050422	Zm00001d050422	SOS3-interacting protein 3	SOS3-interacting protein 3	SOS3-interacting protein 3
1920	OG0000119	Gh_D07G0265	Zm00001d032155	Zm00001d020497	SOS3-interacting protein 3	SOS3-interacting protein 3	SOS3-interacting protein 3
1921	OG0000119	Gh_D07G0265	Zm00001d032155	Zm00001d032155	SOS3-interacting protein 3	SOS3-interacting protein 3	SOS3-interacting protein 3
1922	OG0000119	Gh_D07G0265	Zm00001d032155	Zm00001d050422	SOS3-interacting protein 3	SOS3-interacting protein 3	SOS3-interacting protein 3
1923	OG0000119	Gh_D07G0265	Zm00001d020497	Zm00001d020497	SOS3-interacting protein 3	SOS3-interacting protein 3	SOS3-interacting protein 3
1924	OG0000119	Gh_D07G0265	Zm00001d020497	Zm00001d032155	SOS3-interacting protein 3	SOS3-interacting protein 3	SOS3-interacting protein 3
1925	OG0000119	Gh_D07G0265	Zm00001d020497	Zm00001d050422	SOS3-interacting protein 3	SOS3-interacting protein 3	SOS3-interacting protein 3
1926	OG0000123	Gh_D08G0613	Zm00001d013340	Zm00001d013340	N/A	Nucleotide-diphospho-sugar transferase family protein	Nucleotide-diphospho-sugar transferase family protein
1927	OG0000124	Gh_A05G0402	Zm00001d045122	Zm00001d052022	H(+)-ATPase 8	H(+)-ATPase 6	H(+)-ATPase 8
1928	OG0000124	Gh_A05G1032	Zm00001d045122	NA	H(+)-ATPase 9	H(+)-ATPase 6	N/A
1929	OG0000124	Gh_A06G2099	Zm00001d045122	Zm00001d052022	H(+)-ATPase 8	H(+)-ATPase 6	H(+)-ATPase 8
1930	OG0000124	Gh_A10G0615	Zm00001d045122	NA	H(+)-ATPase 9	H(+)-ATPase 6	N/A
1931	OG0000124	Gh_A13G1631	Zm00001d045122	Zm00001d052022	H(+)-ATPase 8	H(+)-ATPase 6	H(+)-ATPase 8
1932	OG0000124	Gh_D05G0517	Zm00001d045122	Zm00001d045122	H(+)-ATPase 8	H(+)-ATPase 6	H(+)-ATPase 6
1933	OG0000124	Gh_D05G0517	Zm00001d052022	Zm00001d045122	H(+)-ATPase 8	H(+)-ATPase 8	H(+)-ATPase 6
1934	OG0000124	Gh_D05G1149	Zm00001d045122	NA	H(+)-ATPase 9	H(+)-ATPase 6	N/A
1935	OG0000124	Gh_D10G0785	Zm00001d045122	NA	H(+)-ATPase 9	H(+)-ATPase 6	N/A
1936	OG0000124	Gh_D13G1995	Zm00001d045122	Zm00001d052022	H(+)-ATPase 8	H(+)-ATPase 6	H(+)-ATPase 8
1937	OG0000126	Gh_A08G1633	Zm00001d006371	Zm00001d026650	C2 calcium/lipid-binding plant phosphoribosyltransferase family protein	C2 calcium/lipid-binding plant phosphoribosyltransferase family protein	C2 calcium/lipid-binding plant phosphoribosyltransferase family protein
1938	OG0000126	Gh_A08G1633	Zm00001d006371	Zm00001d001785	C2 calcium/lipid-binding plant phosphoribosyltransferase family protein	C2 calcium/lipid-binding plant phosphoribosyltransferase family protein	C2 calcium/lipid-binding plant phosphoribosyltransferase family protein
1939	OG0000126	Gh_A08G1633	Zm00001d021494	Zm00001d026650	C2 calcium/lipid-binding plant phosphoribosyltransferase family protein	C2 calcium/lipid-binding plant phosphoribosyltransferase family protein	C2 calcium/lipid-binding plant phosphoribosyltransferase family protein
1940	OG0000126	Gh_A08G1633	Zm00001d021494	Zm00001d001785	C2 calcium/lipid-binding plant phosphoribosyltransferase family protein	C2 calcium/lipid-binding plant phosphoribosyltransferase family protein	C2 calcium/lipid-binding plant phosphoribosyltransferase family protein
1941	OG0000126	Gh_A08G1633	Zm00001d001785	Zm00001d026650	C2 calcium/lipid-binding plant phosphoribosyltransferase family protein	C2 calcium/lipid-binding plant phosphoribosyltransferase family protein	C2 calcium/lipid-binding plant phosphoribosyltransferase family protein
1942	OG0000126	Gh_A08G1633	Zm00001d001785	Zm00001d001785	C2 calcium/lipid-binding plant phosphoribosyltransferase family protein	C2 calcium/lipid-binding plant phosphoribosyltransferase family protein	C2 calcium/lipid-binding plant phosphoribosyltransferase family protein
1943	OG0000126	Gh_A08G1633	Zm00001d026650	Zm00001d026650	C2 calcium/lipid-binding plant phosphoribosyltransferase family protein	C2 calcium/lipid-binding plant phosphoribosyltransferase family protein	C2 calcium/lipid-binding plant phosphoribosyltransferase family protein
1944	OG0000126	Gh_A08G1633	Zm00001d026650	Zm00001d001785	C2 calcium/lipid-binding plant phosphoribosyltransferase family protein	C2 calcium/lipid-binding plant phosphoribosyltransferase family protein	C2 calcium/lipid-binding plant phosphoribosyltransferase family protein
1945	OG0000126	Gh_A09G1185	Zm00001d036801	Zm00001d046749	Calcium-dependent lipid-binding (CaLB domain) plant phosphoribosyltransferase family protein	Calcium-dependent lipid-binding (CaLB domain) plant phosphoribosyltransferase family protein	Calcium-dependent lipid-binding (CaLB domain) plant phosphoribosyltransferase family protein
1946	OG0000126	Gh_A09G1185	Zm00001d046749	Zm00001d036801	Calcium-dependent lipid-binding (CaLB domain) plant phosphoribosyltransferase family protein	Calcium-dependent lipid-binding (CaLB domain) plant phosphoribosyltransferase family protein	Calcium-dependent lipid-binding (CaLB domain) plant phosphoribosyltransferase family protein
1947	OG0000126	Gh_A09G1185	Zm00001d046749	Zm00001d046749	Calcium-dependent lipid-binding (CaLB domain) plant phosphoribosyltransferase family protein	Calcium-dependent lipid-binding (CaLB domain) plant phosphoribosyltransferase family protein	Calcium-dependent lipid-binding (CaLB domain) plant phosphoribosyltransferase family protein
1948	OG0000126	Gh_A13G1862	Zm00001d036801	Zm00001d046749	Calcium-dependent lipid-binding (CaLB domain) plant phosphoribosyltransferase family protein	Calcium-dependent lipid-binding (CaLB domain) plant phosphoribosyltransferase family protein	Calcium-dependent lipid-binding (CaLB domain) plant phosphoribosyltransferase family protein
1949	OG0000126	Gh_A13G1862	Zm00001d046749	Zm00001d036801	Calcium-dependent lipid-binding (CaLB domain) plant phosphoribosyltransferase family protein	Calcium-dependent lipid-binding (CaLB domain) plant phosphoribosyltransferase family protein	Calcium-dependent lipid-binding (CaLB domain) plant phosphoribosyltransferase family protein
1950	OG0000126	Gh_A13G1862	Zm00001d046749	Zm00001d046749	Calcium-dependent lipid-binding (CaLB domain) plant phosphoribosyltransferase family protein	Calcium-dependent lipid-binding (CaLB domain) plant phosphoribosyltransferase family protein	Calcium-dependent lipid-binding (CaLB domain) plant phosphoribosyltransferase family protein
1951	OG0000126	Gh_D06G1176	Zm00001d046749	NA	Calcium-dependent lipid-binding (CaLB domain) plant phosphoribosyltransferase family protein	Calcium-dependent lipid-binding (CaLB domain) plant phosphoribosyltransferase family protein	N/A
1952	OG0000126	Gh_D08G1951	Zm00001d006371	Zm00001d001785	C2 calcium/lipid-binding plant phosphoribosyltransferase family protein	C2 calcium/lipid-binding plant phosphoribosyltransferase family protein	C2 calcium/lipid-binding plant phosphoribosyltransferase family protein
1953	OG0000126	Gh_D08G1951	Zm00001d006371	Zm00001d026650	C2 calcium/lipid-binding plant phosphoribosyltransferase family protein	C2 calcium/lipid-binding plant phosphoribosyltransferase family protein	C2 calcium/lipid-binding plant phosphoribosyltransferase family protein
1954	OG0000126	Gh_D08G1951	Zm00001d021494	Zm00001d001785	C2 calcium/lipid-binding plant phosphoribosyltransferase family protein	C2 calcium/lipid-binding plant phosphoribosyltransferase family protein	C2 calcium/lipid-binding plant phosphoribosyltransferase family protein
1955	OG0000126	Gh_D08G1951	Zm00001d021494	Zm00001d026650	C2 calcium/lipid-binding plant phosphoribosyltransferase family protein	C2 calcium/lipid-binding plant phosphoribosyltransferase family protein	C2 calcium/lipid-binding plant phosphoribosyltransferase family protein
1956	OG0000126	Gh_D08G1951	Zm00001d001785	Zm00001d001785	C2 calcium/lipid-binding plant phosphoribosyltransferase family protein	C2 calcium/lipid-binding plant phosphoribosyltransferase family protein	C2 calcium/lipid-binding plant phosphoribosyltransferase family protein
1957	OG0000126	Gh_D08G1951	Zm00001d001785	Zm00001d026650	C2 calcium/lipid-binding plant phosphoribosyltransferase family protein	C2 calcium/lipid-binding plant phosphoribosyltransferase family protein	C2 calcium/lipid-binding plant phosphoribosyltransferase family protein
1958	OG0000126	Gh_D08G1951	Zm00001d026650	Zm00001d001785	C2 calcium/lipid-binding plant phosphoribosyltransferase family protein	C2 calcium/lipid-binding plant phosphoribosyltransferase family protein	C2 calcium/lipid-binding plant phosphoribosyltransferase family protein
1959	OG0000126	Gh_D08G1951	Zm00001d026650	Zm00001d026650	C2 calcium/lipid-binding plant phosphoribosyltransferase family protein	C2 calcium/lipid-binding plant phosphoribosyltransferase family protein	C2 calcium/lipid-binding plant phosphoribosyltransferase family protein
1960	OG0000126	Gh_D09G1190	Zm00001d036801	Zm00001d046749	Calcium-dependent lipid-binding (CaLB domain) plant phosphoribosyltransferase family protein	Calcium-dependent lipid-binding (CaLB domain) plant phosphoribosyltransferase family protein	Calcium-dependent lipid-binding (CaLB domain) plant phosphoribosyltransferase family protein
1961	OG0000126	Gh_D09G1190	Zm00001d046749	Zm00001d046749	Calcium-dependent lipid-binding (CaLB domain) plant phosphoribosyltransferase family protein	Calcium-dependent lipid-binding (CaLB domain) plant phosphoribosyltransferase family protein	Calcium-dependent lipid-binding (CaLB domain) plant phosphoribosyltransferase family protein
1962	OG0000126	Gh_D09G1190	Zm00001d046749	Zm00001d036801	Calcium-dependent lipid-binding (CaLB domain) plant phosphoribosyltransferase family protein	Calcium-dependent lipid-binding (CaLB domain) plant phosphoribosyltransferase family protein	Calcium-dependent lipid-binding (CaLB domain) plant phosphoribosyltransferase family protein
1963	OG0000126	Gh_D13G2250	Zm00001d036801	Zm00001d046749	Calcium-dependent lipid-binding (CaLB domain) plant phosphoribosyltransferase family protein	Calcium-dependent lipid-binding (CaLB domain) plant phosphoribosyltransferase family protein	Calcium-dependent lipid-binding (CaLB domain) plant phosphoribosyltransferase family protein
1964	OG0000126	Gh_D13G2250	Zm00001d046749	Zm00001d036801	Calcium-dependent lipid-binding (CaLB domain) plant phosphoribosyltransferase family protein	Calcium-dependent lipid-binding (CaLB domain) plant phosphoribosyltransferase family protein	Calcium-dependent lipid-binding (CaLB domain) plant phosphoribosyltransferase family protein
1965	OG0000126	Gh_D13G2250	Zm00001d046749	Zm00001d046749	Calcium-dependent lipid-binding (CaLB domain) plant phosphoribosyltransferase family protein	Calcium-dependent lipid-binding (CaLB domain) plant phosphoribosyltransferase family protein	Calcium-dependent lipid-binding (CaLB domain) plant phosphoribosyltransferase family protein
1966	OG0000128	Gh_A10G0831	Zm00001d031815	NA	phospholipase A 2A	phospholipase A 2A	N/A
1967	OG0000128	Gh_A11G0425	Zm00001d005911	Zm00001d031814	PATATIN-like protein 4	phospholipase A 2A	phospholipase A 2A
1968	OG0000128	Gh_D10G0926	Zm00001d031815	NA	phospholipase A 2A	phospholipase A 2A	N/A
1969	OG0000128	Gh_D11G0495	Zm00001d005911	Zm00001d031814	PATATIN-like protein 4	phospholipase A 2A	phospholipase A 2A
1970	OG0000129	Gh_A05G1116	Zm00001d035064	NA	HXXXD-type acyl-transferase family protein	HXXXD-type acyl-transferase family protein	N/A
1971	OG0000129	Gh_A06G1882	Zm00001d035064	NA	HXXXD-type acyl-transferase family protein	HXXXD-type acyl-transferase family protein	N/A
1972	OG0000129	Gh_A11G1789	Zm00001d035064	NA	HXXXD-type acyl-transferase family protein	HXXXD-type acyl-transferase family protein	N/A
1973	OG0000129	Gh_A11G1790	Zm00001d035064	NA	HXXXD-type acyl-transferase family protein	HXXXD-type acyl-transferase family protein	N/A
1974	OG0000129	Gh_A11G1791	Zm00001d035064	NA	HXXXD-type acyl-transferase family protein	HXXXD-type acyl-transferase family protein	N/A
1975	OG0000129	Gh_A11G1792	Zm00001d035064	NA	HXXXD-type acyl-transferase family protein	HXXXD-type acyl-transferase family protein	N/A
1976	OG0000129	Gh_D06G0260	Zm00001d035064	NA	HXXXD-type acyl-transferase family protein	HXXXD-type acyl-transferase family protein	N/A
1977	OG0000129	Gh_D11G1950	Zm00001d035064	NA	HXXXD-type acyl-transferase family protein	HXXXD-type acyl-transferase family protein	N/A
1978	OG0000129	Gh_D11G1952	Zm00001d035064	NA	HXXXD-type acyl-transferase family protein	HXXXD-type acyl-transferase family protein	N/A
1979	OG0000129	Gh_D11G1953	Zm00001d035064	NA	HXXXD-type acyl-transferase family protein	HXXXD-type acyl-transferase family protein	N/A
1980	OG0000129	Gh_D11G3457	Zm00001d035064	NA	HXXXD-type acyl-transferase family protein	HXXXD-type acyl-transferase family protein	N/A
1981	OG0000130	Gh_A12G1913	Zm00001d012819	NA	2-oxoglutarate (2OG) and Fe(II)-dependent oxygenase superfamily protein	2-oxoglutarate (2OG) and Fe(II)-dependent oxygenase superfamily protein	N/A
1982	OG0000132	Gh_A03G0077	Zm00001d002748	NA	ERF family protein 38	ERF family protein 38	N/A
1983	OG0000132	Gh_A03G0077	Zm00001d026182	NA	ERF family protein 38	Integrase-type DNA-binding superfamily protein	N/A
1984	OG0000132	Gh_A07G1378	Zm00001d002748	NA	Integrase-type DNA-binding superfamily protein	ERF family protein 38	N/A
1985	OG0000132	Gh_A07G1378	Zm00001d026182	NA	Integrase-type DNA-binding superfamily protein	Integrase-type DNA-binding superfamily protein	N/A
1986	OG0000132	Gh_A08G1242	Zm00001d002748	NA	Integrase-type DNA-binding superfamily protein	ERF family protein 38	N/A
1987	OG0000132	Gh_A08G1242	Zm00001d026182	NA	Integrase-type DNA-binding superfamily protein	Integrase-type DNA-binding superfamily protein	N/A
1988	OG0000132	Gh_A08G1516	Zm00001d002748	NA	ERF family protein 38	ERF family protein 38	N/A
1989	OG0000132	Gh_A08G1516	Zm00001d026182	NA	ERF family protein 38	Integrase-type DNA-binding superfamily protein	N/A
1990	OG0000132	Gh_A11G0697	Zm00001d017478	Zm00001d026182	Integrase-type DNA-binding superfamily protein	Integrase-type DNA-binding superfamily protein	Integrase-type DNA-binding superfamily protein
1991	OG0000132	Gh_A11G0697	Zm00001d051350	Zm00001d026182	Integrase-type DNA-binding superfamily protein	Integrase-type DNA-binding superfamily protein	Integrase-type DNA-binding superfamily protein
1992	OG0000132	Gh_A11G0697	Zm00001d002747	Zm00001d026182	Integrase-type DNA-binding superfamily protein	Integrase-type DNA-binding superfamily protein	Integrase-type DNA-binding superfamily protein
1993	OG0000132	Gh_A11G0697	Zm00001d026184	Zm00001d026182	Integrase-type DNA-binding superfamily protein	ERF family protein 38	Integrase-type DNA-binding superfamily protein
1994	OG0000132	Gh_A11G0697	Zm00001d002748	Zm00001d026182	Integrase-type DNA-binding superfamily protein	ERF family protein 38	Integrase-type DNA-binding superfamily protein
1995	OG0000132	Gh_A11G0697	Zm00001d002748	Zm00001d017480	Integrase-type DNA-binding superfamily protein	ERF family protein 38	Integrase-type DNA-binding superfamily protein
1996	OG0000132	Gh_A11G0697	Zm00001d017477	Zm00001d026182	Integrase-type DNA-binding superfamily protein	Integrase-type DNA-binding superfamily protein	Integrase-type DNA-binding superfamily protein
1997	OG0000132	Gh_A11G0697	Zm00001d051355	Zm00001d026182	Integrase-type DNA-binding superfamily protein	Integrase-type DNA-binding superfamily protein	Integrase-type DNA-binding superfamily protein
1998	OG0000132	Gh_A11G0697	Zm00001d017480	Zm00001d026182	Integrase-type DNA-binding superfamily protein	Integrase-type DNA-binding superfamily protein	Integrase-type DNA-binding superfamily protein
[truncated: 16,030 more rows]
