# Supplementary material for: Comparative Transcriptomics Reveal Metabolic Rather than Genetic Control of Divergent Antioxidant Metabolism in the Primary Root Elongation Zone of Water-Stressed Cotton and Maize
Source: Antioxidants (Basel). 2023 Jan 27;12(2):287. doi: 10.3390/antiox12020287 (PMC9952253; doi:10.3390/antiox12020287)
Supplement: Supplementary file 1 [file antioxidants-12-00287-s001.zip › Table S7.xlsx]

## Sheet: Table S7
Supplemental Table S7.Ortholog group IDs and ratios of transcript abundance in each comparison for orthologs that were DATs in both cotton and maize primary roots in response to water-deficit stress identified with different methods. White IDs indicate that paired orthologs were identified with two methods; grey IDs indicate that paired orthologs were identified with only one method. Yellow cells…
Category	Orthogroup	Cotton ID	WS48/WW24log2FC	WS48/WW48log2FC	Maize ID	WS48/WW24log2FC	WS48/WW48log2FC	Function
ABA biosynthesis and receptor	OG0000375	Gh_A03G1467	-1.92	-2.925	Zm00001d025901	-1.996	-1.762	GRAM domain-containing protein / ABA-responsive protein-related
		Gh_A12G1208	-3.504	-3.205	Zm00001d025901	-1.996	-1.762
		Gh_A13G0536	-2.058	-2.951	Zm00001d025901	-1.996	-1.762
		Gh_D02G1931	-1.716	-2.689	Zm00001d025901	-1.996	-1.762
		Gh_D02G1932	-1.655	-1.709	Zm00001d025901	-1.996	-1.762
		Gh_D12G1331	-2.213	-2.399	Zm00001d025901	-1.996	-1.762
		Gh_D13G0595	-1.602	-2.334	Zm00001d025901	-1.996	-1.762
	OG0000703	Gh_A07G0123	1.688	1.262	Zm00001d011202	1.279	1.132	Protein phosphatase 2C family protein / homology to ABI
		Gh_A07G0123	1.688	1.262	Zm00001d044301	1.755	1.656
		Gh_D07G2383	1.138	1.066	Zm00001d011202	1.279	1.132
		Gh_D07G2383	1.138	1.066	Zm00001d044301	1.755	1.656
		Gh_A07G0123	1.688	1.262	Zm00001d038846	2.006	1.711
		Gh_A07G0123	1.688	1.262	Zm00001d011131	1.13	1.113
		Gh_D07G2383	1.138	1.066	Zm00001d038846	2.006	1.711
		Gh_D07G2383	1.138	1.066	Zm00001d011131	1.13	1.113
	OG0000880	Gh_A01G0280	4.609	3.472	Zm00001d033222	3.811	2.88	nine-cis-epoxycarotenoid dioxygenase
		Gh_A06G2014	1.378	2.621	Zm00001d033222	3.811	2.88
		Gh_A13G1311	5.883	3.085	Zm00001d033222	3.811	2.88
		Gh_D01G0291	4.52	3.133	Zm00001d033222	3.811	2.88
		Gh_D06G1506	1.777	2.83	Zm00001d033222	3.811	2.88
		Gh_D13G1614	4.576	2.07	Zm00001d033222	3.811	2.88
	OG0000926	Gh_D02G1153	-2.499	-3.665	Zm00001d043782	-2.85	-2.906	related to ABI3/VP1
	OG0001309	Gh_A10G1998	1.589	1.006	Zm00001d028574	3.701	2.351	protein phosphatase 2CA / highly ABA-induced PP2C gene 2
		Gh_A10G1998	1.589	1.006	Zm00001d012401	1.888	1.941
		Gh_A10G1998	1.589	1.006	Zm00001d042886	2.324	2.427
	OG0002156	Gh_A09G1649	5.765	5.786	Zm00001d009626	6.413	6.262	protein phosphatase 2CA / highly ABA-induced PP2C gene
		Gh_A09G1649	5.765	5.786	Zm00001d011495	5.241	4.589
		Gh_D04G0015	8.674	8.035	Zm00001d009626	6.413	6.262
		Gh_D04G0015	8.674	8.035	Zm00001d011495	5.241	4.589
		Gh_A05G3589	4.791	5.309	Zm00001d009626	6.413	6.262
		Gh_A05G3589	4.791	5.309	Zm00001d011495	5.241	4.589
		Gh_A12G2274	4.178	6.108	Zm00001d009626	6.413	6.262
		Gh_A12G2274	4.178	6.108	Zm00001d011495	5.241	4.589
	OG0004385	Gh_A01G0491	1.572	1.17	Zm00001d032572	1.538	1.656	G protein coupled receptor
		Gh_D01G0507	1.392	1.084	Zm00001d032572	1.538	1.656
	OG0011269	Gh_A12G2380	3.016	3.141	Zm00001d025055	7.611	9.038	Protein phosphatase 2C family protein
		Gh_D12G2508	1.946	1.919	Zm00001d025055	7.611	9.038
Acyltransferase activity	OG0000233	Gh_D06G1745	1.292	1.889	Zm00001d039366	-1.156	-1.613	TRICHOME BIREFRINGENCE-LIKE 38
		Gh_D06G2148	-1.963	-1.212	Zm00001d039366	-1.156	-1.613
		Gh_D10G0293	-2.038	-1.183	Zm00001d039366	-1.156	-1.613
	OG0002860	Gh_A10G2086	1.713	1.35	Zm00001d042826	-1.394	-2.576	HXXXD-type acyl-transferase family protein
	OG0002935	Gh_A12G1822	-3.895	-4.097	Zm00001d036197	3.604	3.575	HXXXD-type acyl-transferase family protein
	OG0005659	Gh_A08G1491	-2.06	-2.272	Zm00001d051334	4.636	3.712	HXXXD-type acyl-transferase family protein
Amino acid metabolism	OG0000600	Gh_D09G0383	-1.291	-1.747	Zm00001d003931	-1.81	-2.544	ACT domain repeat 6
	OG0000634	Gh_A12G0470	-2.078	-2.409	Zm00001d009631	2.104	2.387	CTP synthase family protein
		Gh_D12G0472	-2.542	-3.255	Zm00001d009631	2.104	2.387
		Gh_A12G0470	-2.078	-2.409	Zm00001d011486	-1.818	-1.152
		Gh_D12G0472	-2.542	-3.255	Zm00001d011486	-1.818	-1.152
	OG0001037	Gh_A05G0518	-2.713	-2.845	Zm00001d050079	-1.83	-2.247	glutamine dumper
		Gh_D05G0637	-1.49	-1.449	Zm00001d050079	-1.83	-2.247
	OG0001082	Gh_D05G2283	-3.541	-4.815	Zm00001d016811	-2.549	-2.431	ACT domain repeat 3
	OG0001387	Gh_A08G1891	-1.221	-3.462	Zm00001d034420	-1.638	-1.679	glutamate dehydrogenase
		Gh_D08G2256	-1.215	-3.551	Zm00001d034420	-1.638	-1.679
	OG0001961	Gh_A01G1899	11.621	9.691	Zm00001d012391	3.254	3.459	delta1-pyrroline-5-carboxylate synthase
		Gh_A04G1396	3.363	3.847	Zm00001d012391	3.254	3.459
		Gh_D04G1204	3.328	3.799	Zm00001d012391	3.254	3.459
	OG0003294	Gh_D02G2193	1.596	2.492	Zm00001d045470	1.086	1.154	arginine decarboxylase 2
	OG0004309	Gh_A11G1551	-2.126	-1.659	Zm00001d029853	-5.412	-5.527	Methylenetetrahydrofolate reductase family protein
		Gh_A11G1551	-2.126	-1.659	Zm00001d047124	-4.404	-4.215
		Gh_D11G1706	-2.057	-1.837	Zm00001d029853	-5.412	-5.527
		Gh_D11G1706	-2.057	-1.837	Zm00001d047124	-4.404	-4.215
	OG0010748	Gh_A10G0770	-1.729	-1.687	Zm00001d027861	-2.329	-2.692	alanine:glyoxylate aminotransferase 2
		Gh_D10G2582	-1.264	-1.127	Zm00001d027861	-2.329	-2.692
Calcium ion binding	OG0000460	Gh_D12G1143	-1.706	-2.048	Zm00001d053926	-1.162	-1.295	Calcium-binding EF-hand family protein
		Gh_A01G0537	-1.157	-1.317	Zm00001d014491	-1.163	-1.826
		Gh_A13G1212	-1.481	-1.072	Zm00001d014491	-1.163	-1.826
		Gh_D01G0551	-1.571	-1.783	Zm00001d014491	-1.163	-1.826
		Gh_D13G0643	-1.684	-1.319	Zm00001d014491	-1.163	-1.826
Carbohydrate metabolism	OG0000063	Gh_A09G0635	-1.093	-1.522	Zm00001d038049	-2.49	-3.964	Glycosyl hydrolase superfamily protein
		Gh_A09G0635	-1.093	-1.522	Zm00001d042140	3.027	2.813
	OG0000343	Gh_A11G3117	2.61	2.049	Zm00001d005658	-1.698	-1.326	Haloacid dehalogenase-like hydrolase (HAD) superfamily protein
		Gh_A11G3117	2.61	2.049	Zm00001d020272	-2.752	-3.276
		Gh_A11G3117	2.61	2.049	Zm00001d032298	3.816	3.412
		Gh_D11G2201	2.997	1.749	Zm00001d005658	-1.698	-1.326
		Gh_D11G2201	2.997	1.749	Zm00001d020272	-2.752	-3.276
		Gh_D11G2201	2.997	1.749	Zm00001d032298	3.816	3.412
	OG0000346	Gh_D02G0251	-1.205	-1.722	Zm00001d021026	-2.615	-2.445	UDP-D-glucuronate 4-epimerase 6
	OG0000656	Gh_A06G0716	2.113	1.202	Zm00001d045042	-1.267	-1.24	sucrose synthase 4
		Gh_D05G0363	-1.217	-1.391	Zm00001d045042	-1.267	-1.24
	OG0000804	Gh_A03G1723	1.145	1.083	Zm00001d039131	2.863	3.265	Glucose-1-phosphate adenylyltransferase family protein
		Gh_A05G1645	1.749	2.033	Zm00001d039131	2.863	3.265
		Gh_D02G2156	1.386	1.234	Zm00001d039131	2.863	3.265
	OG0000972	Gh_A09G1747	2.215	3.676	Zm00001d025943	-6.114	-6.13	Glycosyl hydrolases family 32 protein/invertase
		Gh_D09G1856	2.975	2.042	Zm00001d025943	-6.114	-6.13
	OG0001281	Gh_A03G1983	-1.533	-1.424	Zm00001d047110	-2.139	-1.832	Haloacid dehalogenase-like hydrolase (HAD) superfamily protein
		Gh_A12G1807	-1.496	-1.087	Zm00001d017502	-3.046	-3.36
		Gh_A12G1807	-1.496	-1.087	Zm00001d047110	-2.139	-1.832
		Gh_D03G1545	-2.177	-1.77	Zm00001d017502	-3.046	-3.36
		Gh_D03G1545	-2.177	-1.77	Zm00001d047110	-2.139	-1.832
		Gh_D12G1978	-1.438	-1.156	Zm00001d017502	-3.046	-3.36
		Gh_D12G1978	-1.438	-1.156	Zm00001d047110	-2.139	-1.832
	OG0001566	Gh_D03G1327	-1.318	-1.054	Zm00001d027313	2.637	3.065	xyloglucan endotransglucosylase/hydrolase
		Gh_A03G0243	-2.704	-1.868	Zm00001d027313	2.637	3.065
	OG0001733	Gh_D08G1234	-1.966	-1.659	Zm00001d031802	1.45	1.604	NAD(P)-binding Rossmann-fold superfamily protein
	OG0001763	Gh_A11G0260	-5.719	-8.434	Zm00001d029983	-2.848	-2.956	chloroplast beta-amylase
		Gh_A12G1931	-8.04	-7.939	Zm00001d029983	-2.848	-2.956
		Gh_D09G0578	4.571	3.445	Zm00001d014083	7.645	6.968	beta-amylase 1
		Gh_D09G0578	4.571	3.445	Zm00001d027619	2.257	2.466
		Gh_D10G1605	1.769	2.497	Zm00001d014083	7.645	6.968
		Gh_D10G1605	1.769	2.497	Zm00001d027619	2.257	2.466
		Gh_D12G2112	-5.401	-5.761	Zm00001d029983	-2.848	-2.956	chloroplast beta-amylase
	OG0001832	Gh_D13G1075	1.413	1.079	Zm00001d028998	1.693	1.55	hydroxyproline-rich glycoprotein family protein
		Gh_D13G1075	1.413	1.079	Zm00001d022420	3.054	1.006
		Gh_D13G1075	1.413	1.079	Zm00001d022516	3.767	2.061
	OG0002341	Gh_D06G1057	2.169	1.173	Zm00001d050125	1.503	1.337	sucrose phosphate synthase 1F
	OG0002854	Gh_D01G2251	-2.068	-2.379	Zm00001d012983	-1.107	-1.905	TRICHOME BIREFRINGENCE-LIKE 34
	OG0003434	Gh_A07G2133	-2.871	-3.155	Zm00001d016588	-1.19	-1.291	PLC-like phosphodiesterases superfamily protein / senescence-related gene 3
		Gh_D07G2342	-4.025	-4.903	Zm00001d016588	-1.19	-1.291
	OG0004006	Gh_A11G2945	1.811	1.343	Zm00001d012313	4.959	5.21	Carbohydrate-binding-like fold
	OG0004291	Gh_A01G1778	2.733	1.905	Zm00001d003817	1.415	1.822	starch branching enzyme 2.2
		Gh_D01G2020	1.203	1.22	Zm00001d003817	1.415	1.822
		Gh_D04G0999	1.729	1.33	Zm00001d003817	1.415	1.822
		Gh_D04G0999	1.729	1.33	Zm00001d016684	2.579	4.307
	OG0005052	Gh_D12G1848	-2.258	-3.833	Zm00001d003277	-3.446	-3.335	Raffinose synthase family protein/seed imbibition
		Gh_A12G1686	-3.392	-5.262	Zm00001d003280	-2.375	-2.656
		Gh_A12G1686	-3.392	-5.262	Zm00001d003277	-3.446	-3.335
	OG0007201	Gh_A01G1088	2.922	2.251	Zm00001d019163	3.503	3.538	Raffinose synthase family protein/seed imbibition
	OG0008948	Gh_A13G1088	-1.148	-2.306	Zm00001d031300	-1.452	-1.494	Raffinose synthase family protein/seed imbibition
		Gh_A13G1088	-1.148	-2.306	Zm00001d031303	-1.407	-1.496
	OG0009787	Gh_D11G1920	-3.186	-2.746	Zm00001d031808	1.956	2.331	NAD(P)-binding Rossmann-fold superfamily protein
Cell redox homeostasis	OG0006868	Gh_D05G1751	4.622	2.099	Zm00001d012591	4.83	4.439	DC1 domain-containing protein
Chaperone binding	OG0009115	Gh_D08G1413	-1.357	-1.305	Zm00001d016070	4.501	4.209	BCL-2-associated athanogene 6
Defense response	OG0000059	Gh_A08G0770	-1.107	-1.096	Zm00001d018322	-1.242	-1.103	CAP (Cysteine-rich secretory proteins, Antigen 5, and Pathogenesis-related 1 protein) superfamily protein
Deoxyhypusine synthase activity	OG0006758	Gh_D10G2009	-2.058	-1.605	Zm00001d003994	-6.049	-7.99	deoxyhypusine synthase
Expansin	OG0002150	Gh_A03G2186	-1.993	-3.63	Zm00001d029783	-1.385	-1.659	expansin-like
		Gh_A03G2186	-1.993	-3.63	Zm00001d027520	2.368	1.855
		Gh_D01G1679	-1.161	-1.237	Zm00001d029783	-1.385	-1.659
		Gh_D01G1679	-1.161	-1.237	Zm00001d027520	2.368	1.855
Hydrolase activity	OG0000080	Gh_A09G1277	1.578	1.139	Zm00001d011246	1.264	1.221	Putative lysine decarboxylase family protein
	OG0000204	Gh_A03G1429	2.105	2.333	Zm00001d010697	2.041	2.335	Auxin-responsive GH3 family protein
	OG0000662	Gh_D10G0577	-1.455	-1.39	Zm00001d011734	1.76	5.055	Pyridoxal phosphate phosphatase-related protein / phosphate starvation-induced gene 2
	OG0000700	Gh_D10G1040	1.03	1.516	Zm00001d007258	4.217	4.225	carboxyesterase 18
	OG0001412	Gh_D05G2496	-1.223	-1.82	Zm00001d044947	-1.554	-2.116	alpha/beta-Hydrolases superfamily protein
	OG0001619	Gh_A02G1031	2.206	2.382	Zm00001d009702	-1.251	-1.102	P-loop containing nucleoside triphosphate hydrolases superfamily protein
		Gh_A02G1031	2.206	2.382	Zm00001d039315	2.255	2.171
		Gh_A02G1031	2.206	2.382	Zm00001d008983	5.515	6.469
		Gh_D03G0699	2.876	2.957	Zm00001d009702	-1.251	-1.102
		Gh_D03G0699	2.876	2.957	Zm00001d039315	2.255	2.171
		Gh_D03G0699	2.876	2.957	Zm00001d008983	5.515	6.469
	OG0003333	Gh_D11G0268	-2.268	-3.475	Zm00001d000037	-1.869	-2.612	alpha/beta-Hydrolases superfamily protein
	OG0003852	Gh_A04G0876	-1.4	-1.583	Zm00001d052667	-2.193	-2.818	nudix hydrolase homolog
		Gh_A04G0876	-1.4	-1.583	Zm00001d050600	-3.379	-3.211
		Gh_D04G1377	-1.53	-2.165	Zm00001d052667	-2.193	-2.818
		Gh_D04G1377	-1.53	-2.165	Zm00001d050600	-3.379	-3.211
	OG0003996	Gh_A08G1504	-1.573	-1.837	Zm00001d002759	-1.322	-1.521	nudix hydrolase homolog 8
		Gh_D08G1802	-1.034	-1.958	Zm00001d002759	-1.322	-1.521
	OG0007443	Gh_A04G0604	-1.366	-1.38	Zm00001d045669	1.488	1.692	acylphosphatase family
Integral component of membrane	OG0000209	Gh_A01G1234	1.069	1.285	Zm00001d034745	-1.355	-1.752	PLANT CADMIUM RESISTANCE 2
	OG0001121	Gh_D09G0573	-4.579	-3.799	Zm00001d028252	3.756	3.388	Caleosin-related family protein
	OG0002542	Gh_D12G1888	1.278	1.067	Zm00001d007341	2.183	1.4	HVA22 homologue E
	OG0002789	Gh_D11G0978	-1.742	-1.238	Zm00001d009382	5.004	2.285	Late embryogenesis abundant protein
	OG0006681	Gh_A05G1638	-2.025	-2.126	Zm00001d008305	3.692	3.304	TRAM, LAG1 and CLN8 (TLC) lipid-sensing domain containing protein
	OG0007228	Gh_A09G0755	1.557	1.085	Zm00001d039039	1.174	1.322	cold regulated 314 thylakoid membrane 2
	OG0011224	Gh_A11G1773	-1.237	-1.628	Zm00001d003508	-1.208	-1.644	N/A
Lipid metabolism	OG0000948	Gh_D08G0664	-1.086	-1.15	Zm00001d010463	-1.798	-2.108	alpha/beta-Hydrolases superfamily protein
	OG0004495	Gh_A09G1570	4.348	3.7	Zm00001d013406	4.291	4.252	alpha/beta-Hydrolases superfamily protein
		Gh_A09G1570	4.348	3.7	Zm00001d033797	1.828	1.597
		Gh_D09G1641	1.999	2.256	Zm00001d013406	4.291	4.252
		Gh_D09G1641	1.999	2.256	Zm00001d033797	1.828	1.597
Major facilitator superfamily	OG0000495	Gh_A10G1803	1.644	1.128	Zm00001d007785	1.148	1.323	Major facilitator superfamily protein
	OG0001250	Gh_A08G0736	3.58	2.81	Zm00001d033272	1.216	1.244	Major facilitator superfamily protein
		Gh_A08G0736	3.58	2.81	Zm00001d033273	4.448	3.784
		Gh_D08G0875	2.777	1.907	Zm00001d033272	1.216	1.244
		Gh_D08G0875	2.777	1.907	Zm00001d033273	4.448	3.784
		Gh_D08G0876	2.835	3.081	Zm00001d033272	1.216	1.244
		Gh_D08G0876	2.835	3.081	Zm00001d033273	4.448	3.784
	OG0001514	Gh_A12G0944	5.667	4.038	Zm00001d002614	2.997	2.815	Major Facilitator Superfamily with SPX (SYG1/Pho81/XPR1) domain-containing protein
		Gh_A12G0944	5.667	4.038	Zm00001d017597	1.395	2.328
	OG0001557	Gh_A05G0177	1.682	1.479	Zm00001d053334	1.555	1.59	Major facilitator superfamily protein
		Gh_A13G1745	1.387	1.141	Zm00001d053334	1.555	1.59
		Gh_D05G0241	1.078	1.604	Zm00001d053334	1.555	1.59
		Gh_D13G2093	2.529	1.64	Zm00001d053334	1.555	1.59
		Gh_D03G0601	1.554	2.005	Zm00001d053334	1.555	1.59
Membrane protein	OG0003940	Gh_A09G0332	2.645	1.549	Zm00001d016979	1.132	1.235	prohibitin
		Gh_D09G0335	1.785	1.194	Zm00001d016979	1.132	1.235
	OG0001277	Gh_D01G0937	-1.947	-2.703	Zm00001d014790	-2.673	-3.138	Chaperone DnaJ-domain superfamily protein
	OG0002931	Gh_A05G1147	-2.166	-1.346	Zm00001d032084	-6.361	-6.244	Chaperone DnaJ-domain superfamily protein
		Gh_A05G1147	-2.166	-1.346	Zm00001d045036	2.349	2.347
		Gh_D05G1324	-3.669	-2.825	Zm00001d032084	-6.361	-6.244
		Gh_D05G1324	-3.669	-2.825	Zm00001d045036	2.349	2.347
Metal ion binding	OG0000399	Gh_A05G1510	4.017	1.942	Zm00001d003865	-4.287	-4.998	Heavy metal transport/detoxification superfamily protein
		Gh_D06G1722	-1.723	-4.739	Zm00001d003865	-4.287	-4.998
	OG0001069	Gh_A08G1780	-1.331	-1.372	Zm00001d048411	-1.886	-1.889	Heavy metal transport/detoxification superfamily protein
		Gh_D08G2126	-1.019	-1.153	Zm00001d048411	-1.886	-1.889
	OG0000416	Gh_A05G0346	-1.11	-2.386	Zm00001d010380	3.562	4.242	CCCH-type zinc finger family protein
		Gh_A13G1728	2.086	3.075	Zm00001d037769	5.855	6.452
		Gh_D13G2076	3.137	1.837	Zm00001d037769	5.855	6.452
		Gh_A05G0346	-1.11	-2.386	Zm00001d037769	5.855	6.452
		Gh_A08G2176	2.994	2.357	Zm00001d037769	5.855	6.452
		Gh_A08G2176	2.994	2.357	Zm00001d010380	3.562	4.242
		Gh_A13G1728	2.086	3.075	Zm00001d010380	3.562	4.242
		Gh_D08G2541	1.762	1.288	Zm00001d037769	5.855	6.452
		Gh_D08G2541	1.762	1.288	Zm00001d010380	3.562	4.242
		Gh_D13G2076	3.137	1.837	Zm00001d010380	3.562	4.242
	OG0000468	Gh_D08G0269	1.307	2.295	Zm00001d015468	2.68	2.668	CONSTANS-like 5
	OG0000485	Gh_A03G0238	-3.066	-3.27	Zm00001d032810	-1.581	-1.683	CHY-type/CTCHY-type/RING-type Zinc finger protein
	OG0001315	Gh_A01G1913	1.586	1.033	Zm00001d008620	1.278	1.251	metallothionein 2A
		Gh_A11G2914	2.527	1.153	Zm00001d008620	1.278	1.251
		Gh_D01G2172	2.51	1.58	Zm00001d008620	1.278	1.251
		Gh_D04G1170	1.023	1.019	Zm00001d008620	1.278	1.251
	OG0001356	Gh_A04G0744	-2.231	-1.256	Zm00001d042848	2.34	1.665	laccase 7
		Gh_A13G2215	-1.855	-2.394	Zm00001d042848	2.34	1.665
		Gh_D13G2524	-1.307	-2.577	Zm00001d042848	2.34	1.665
	OG0010870	Gh_D05G0733	1.078	1.647	Zm00001d040504	1.442	1.318	early nodulin-like protein 18
Nitrogen metabolism	OG0000927	Gh_A07G0379	-2.886	-2.007	Zm00001d026191	-1.351	-2.3	ethylene responsive element binding factor 1
		Gh_A07G0379	-2.886	-2.007	Zm00001d002762	-1.817	-2.235
		Gh_A07G0379	-2.886	-2.007	Zm00001d017462	-1.329	-2.355
	OG0002906	Gh_A13G0448	1.61	2.143	Zm00001d046383	1.534	1.522	nitrate transporter 1:2
	OG0001189	Gh_D02G1633	-1.563	-1.679	Zm00001d040611	1.944	1.853	KNOTTED1-like homeobox gene 6
	OG0001556	Gh_A05G0559	1.58	1.53	Zm00001d020932	1.02	1.136	basic helix-loop-helix (bHLH) DNA-binding superfamily protein
		Gh_D05G0688	1.341	1.382	Zm00001d020932	1.02	1.136
	OG0001880	Gh_D08G1310	-1.638	-1.643	Zm00001d022461	1.663	2.059	ethylene-responsive element binding protein
Nucleic acid binding	OG0000766	Gh_D05G0887	-2.22	-1.532	Zm00001d038270	-1.288	-1.496	Duplicated homeodomain-like superfamily protein
		Gh_D09G1543	-2.703	-3.871	Zm00001d038270	-1.288	-1.496
	OG0001087	Gh_D05G1364	1.355	1.213	Zm00001d022155	2.863	1.984	Leucine-rich repeat transmembrane protein kinase / STRUBBELIG-receptor family 6
	OG0001931	Gh_D12G1734	-2.12	-3.731	Zm00001d039532	-1.47	-2.097	WRKY DNA-binding protein
	OG0001950	Gh_A06G1924	1.708	1.916	Zm00001d045120	1.361	1.768	Integrase-type DNA-binding superfamily protein
	OG0002089	Gh_D07G0639	-1.01	-1.397	Zm00001d052256	-1.082	-1.095	TEOSINTE BRANCHED, cycloidea and PCF (TCP) 14
		Gh_D07G0639	-1.01	-1.397	Zm00001d018045	-1.435	-1.333
	OG0002100	Gh_D07G1502	2.006	1.919	Zm00001d025861	-2.667	-3.275	NAC domain containing protein 74
	OG0003231	Gh_D09G1207	-1.639	-3.163	Zm00001d002536	-1.735	-1.572	Concanavalin A-like lectin protein kinase family protein
	OG0003446	Gh_D06G0303	-1.161	-1.044	Zm00001d018103	-1.515	-1.444	RNA-binding (RRM/RBD/RNP motifs) family protein
Phosphatidylcholine biosynthetic process	OG0007990	Gh_A06G0664	-1.119	-1.33	Zm00001d011193	2.13	2.243	Uncharacterized membrane protein / integral membrane protein
		Gh_D06G0754	-4.538	-4.371	Zm00001d011193	2.13	2.243
Phosphatidylinositol dephosphorylation	OG0005993	Gh_A03G0991	-1.808	-1.47	Zm00001d028366	-1.532	-1.755	DNAse I-like superfamily protein
		Gh_D02G1378	-1.872	-1.298	Zm00001d028366	-1.532	-1.755
Protein phosphorylation	OG0000089	Gh_A11G0474	-1.966	-2.565	Zm00001d047220	2.704	2.708	Protein kinase superfamily protein
	OG0000713	Gh_A02G1701	-1.302	-1.504	Zm00001d026126	-1.696	-2.182	Protein kinase superfamily protein
	OG0003247	Gh_D06G1080	1.326	1.401	Zm00001d005748	4.146	5.569	CBL-interacting protein kinase
	OG0004952	Gh_A05G0561	1.561	1.191	Zm00001d020927	1.382	1.602	AGC (cAMP-dependent, cGMP-dependent and protein kinase C) kinase family protein
	OG0009654	Gh_A06G1191	-2.341	-2.039	Zm00001d002287	-3.616	-3.764	somatic embryogenesis receptor-like kinase 1/inflorescence meristem receptor-like kinase 2 / Leucine-rich receptor-like protein kinase family protein
		Gh_D06G2353	-3.431	-3.731	Zm00001d002287	-3.616	-3.764
Protein binding	OG0000027	Gh_A03G1391	-1.015	-1.307	Zm00001d032083	-1.531	-2.415	O-methyltransferase family protein
		Gh_A03G1391	-1.015	-1.307	Zm00001d010736	-1.543	-1.322
		Gh_A03G1391	-1.015	-1.307	Zm00001d053156	-6.211	-6.618
		Gh_A03G1391	-1.015	-1.307	Zm00001d038700	-1.936	-2.618
		Gh_A03G1391	-1.015	-1.307	Zm00001d029359	-2.256	-2.436
		Gh_A03G1391	-1.015	-1.307	Zm00001d029356	-3.241	-3.362
		Gh_A03G1391	-1.015	-1.307	Zm00001d004921	-3.911	-4.222
		Gh_A03G1391	-1.015	-1.307	Zm00001d049265	-1.188	-2.227
		Gh_A03G1391	-1.015	-1.307	Zm00001d049181	1.52	2.87
		Gh_D04G1663	1.639	1.094	Zm00001d032083	-1.531	-2.415
		Gh_D04G1663	1.639	1.094	Zm00001d010736	-1.543	-1.322
		Gh_D04G1663	1.639	1.094	Zm00001d053156	-6.211	-6.618
		Gh_D04G1663	1.639	1.094	Zm00001d038700	-1.936	-2.618
		Gh_D04G1663	1.639	1.094	Zm00001d029359	-2.256	-2.436
		Gh_D04G1663	1.639	1.094	Zm00001d029356	-3.241	-3.362
		Gh_D04G1663	1.639	1.094	Zm00001d004921	-3.911	-4.222
		Gh_D04G1663	1.639	1.094	Zm00001d049265	-1.188	-2.227
		Gh_D04G1663	1.639	1.094	Zm00001d049181	1.52	2.87
	OG0000478	Gh_A01G0637	2.361	1.185	Zm00001d011656	-1.029	-2.08	mitogen-activated protein kinase kinase kinase 15
	OG0000810	Gh_A05G2423	-6.833	-8.096	Zm00001d027361	-2.258	-2.403	phloem protein 2
		Gh_A12G2603	-3.034	-6.303	Zm00001d027361	-2.258	-2.403
		Gh_D05G2690	-2.754	-2.935	Zm00001d027361	-2.258	-2.403
		Gh_D12G2486	-1.955	-2.521	Zm00001d027361	-2.258	-2.403
	OG0001616	Gh_A08G2199	-1.015	-1.467	Zm00001d022139	-1.647	-1.802	jasmonate-zim-domain protein 1 / TIFY domain/Divergent CCT motif family protein
		Gh_A08G2199	-1.015	-1.467	Zm00001d020614	-2.191	-3.171
	OG0003132	Gh_A06G0385	-2.262	-3.228	Zm00001d042653	-1.846	-1.797	HSP40/DNAJ peptide-binding protein
	OG0003196	Gh_A05G2041	1.373	1.24	Zm00001d000224	2.337	2.578	F-box/RNI-like superfamily protein
		Gh_D05G2285	2.649	1.171	Zm00001d000224	2.337	2.578
	OG0004009	Gh_A09G0410	3.428	2.953	Zm00001d019750	-1.128	-1.766	Calcium-dependent lipid-binding (CaLB domain) family protein
	OG0004108	Gh_A10G0748	2.352	1.48	Zm00001d025375	-1.792	-2.055	Transducin/WD40 repeat-like superfamily protein
	OG0004122	Gh_A08G2486	1.281	1.717	Zm00001d008444	1.337	1.871	RHD SIX-LIKE 1
		Gh_D07G2426	1.837	1.134	Zm00001d008444	1.337	1.871
		Gh_D08G0565	1.046	1.494	Zm00001d008444	1.337	1.871
	OG0004345	Gh_A06G2074	-3.222	-3.467	Zm00001d021746	-4.599	-4.553	Octicosapeptide/Phox/Bem1p family protein
		Gh_A06G2074	-3.222	-3.467	Zm00001d006574	-1.094	-1.398
		Gh_D06G1329	-2.51	-2.505	Zm00001d021746	-4.599	-4.553
		Gh_D06G1329	-2.51	-2.505	Zm00001d006574	-1.094	-1.398
	OG0009960	Gh_A02G1703	1.352	1.018	Zm00001d002658	1.708	1.856	Transducin/WD40 repeat-like superfamily protein
		Gh_D03G0016	1.625	1.52	Zm00001d002658	1.708	1.856
Proteolysis	OG0001526	Gh_D03G0970	-2.177	-2.81	Zm00001d031971	-2.087	-2.008	Cysteine proteinases superfamily protein
	OG0012676	Gh_A06G1230	-2.616	-3.188	Zm00001d010722	-1.351	-1.778	Eukaryotic aspartyl protease family protein
		Gh_D06G1552	-3.02	-2.285	Zm00001d010722	-1.351	-1.778
Redox process and oxidative stress response	OG0000164	Gh_D02G1345	-3.311	-4.448	Zm00001d045846	-2.85	-3.524	Peroxidase superfamily protein
	OG0000317	Gh_A09G1202	-3.723	-4.48	Zm00001d014341	2.421	2.819	Peroxidase superfamily protein
		Gh_A11G3132	-2.765	-1.783	Zm00001d014341	2.421	2.819
		Gh_D08G2420	-2.906	-5.195	Zm00001d014341	2.421	2.819
		Gh_D11G2183	-2.662	-3.42	Zm00001d014341	2.421	2.819
	OG0000633	Gh_A05G1144	1.986	3.562	Zm00001d018298	4.182	3.762	HSP20-like chaperones superfamily protein
		Gh_D05G1321	1.586	2.818	Zm00001d018298	4.182	3.762
	OG0000729	Gh_A09G2214	-2.405	-3.834	Zm00001d006098	-2.422	-1.899	Cyclopropane-fatty-acyl-phospholipid synthase
	OG0001217	Gh_A11G0905	-4.613	-6.027	Zm00001d032042	4.927	5.224	cytochrome P450, family 78, subfamily A, polypeptide 6
	OG0002687	Gh_A06G1918	2.035	1.386	Zm00001d039650	-1.135	-1.28	Cytochrome P450 superfamily protein
		Gh_D08G2495	1.313	1.204	Zm00001d039650	-1.135	-1.28
	OG0004279	Gh_D06G0864	-1.804	-2.572	Zm00001d052079	-1.057	-1.789	lysine-ketoglutarate reductase/saccharopine dehydrogenase bifunctional enzyme
	OG0004664	Gh_A06G0948	-1.67	-1.58	Zm00001d020984	-1.345	-1.168	FAD-dependent oxidoreductase family protein
		Gh_D06G1118	-1.841	-1.545	Zm00001d020984	-1.345	-1.168
	OG0009473	Gh_A05G3239	-2.172	-2.898	Zm00001d035055	-7.442	-8.952	Peroxidase superfamily protein
	OG0011742	Gh_D05G1617	-2.162	-1.322	Zm00001d021634	-3.181	-2.855	HSP20-like chaperones superfamily protein
Response to aluminum ion	OG0003484	Gh_A09G0689	-1.962	-2.787	Zm00001d026632	-2.972	-3.437	Aluminium induced protein with YGL and LRDR motifs
		Gh_A10G0238	-4.545	-5.967	Zm00001d026632	-2.972	-3.437
		Gh_D09G0700	-2.088	-2.318	Zm00001d026632	-2.972	-3.437
		Gh_D10G0217	-3.984	-5.466	Zm00001d026632	-2.972	-3.437
	OG0010895	Gh_D04G1129	1.351	1.998	Zm00001d011001	-3.098	-3.171	aluminum sensitive 3
Response to stress	OG0000056	Gh_A11G0236	-4.941	-4.45	Zm00001d017508	-3.71	-3.488	Bifunctional inhibitor/lipid-transfer protein/seed storage 2S albumin superfamily protein
		Gh_A11G0237	-1.076	-1.202	Zm00001d017508	-3.71	-3.488
		Gh_A11G0239	-2.555	-1.626	Zm00001d017508	-3.71	-3.488
		Gh_D11G0251	-3.106	-4.071	Zm00001d017508	-3.71	-3.488
		Gh_D11G0252	-1.453	-1.3	Zm00001d017508	-3.71	-3.488
		Gh_D11G0254	-1.863	-1.067	Zm00001d017508	-3.71	-3.488
	OG0000365	Gh_A12G1482	1.94	2.134	Zm00001d047293	-1.39	-1.053	plasmodesmata callose-binding protein
		Gh_D12G1609	1.571	1.836	Zm00001d047293	-1.39	-1.053
	OG0001704	Gh_D08G0465	2.152	2.367	Zm00001d040660	2.384	1.872	senescence-associated gene 21
	OG0001756	Gh_D07G0138	1.921	2.564	Zm00001d005802	3.836	3.166	SAUR-like auxin-responsive protein family
	OG0001855	Gh_A06G1407	-1.937	-1.193	Zm00001d022569	-1.088	-1.293	senescence associated gene 20 / Nuclear transport factor 2 (NTF2) family protein
	OG0004823	Gh_D01G0592	1.484	1.559	Zm00001d044228	1.827	1.401	thiazole biosynthetic enzyme, chloroplast (ARA6) (THI1) (THI4)
	OG0005728	Gh_A12G2329	9.749	9.749	Zm00001d032519	8.685	10.584	CAP160 protein
Sulfur metabolism	OG0000241	Gh_A11G1914	1.13	1.223	Zm00001d033862	-2.405	-2.985	1-aminocyclopropane-1-carboxylic acid (acc) synthase
		Gh_D03G0678	-1.825	-1.557	Zm00001d026060	-2.603	-3.338
		Gh_D08G1262	-1.551	-1.304	Zm00001d026060	-2.603	-3.338
		Gh_A11G0207	-2.821	-4.139	Zm00001d026060	-2.603	-3.338
		Gh_D11G0221	-3.121	-3.873	Zm00001d026060	-2.603	-3.338
	OG0001316	Gh_A12G0022	-1.827	-2.212	Zm00001d027749	2.177	1.614	sulfate transporter 3;1
		Gh_D12G0026	-2.938	-3.462	Zm00001d027749	2.177	1.614
	OG0002231	Gh_D13G1280	-1.538	-3.053	Zm00001d054093	-2.374	-3.045	Rhodanese/Cell cycle control phosphatase superfamily protein / sulfurtransferase 18
Thaumatin superfamily protein	OG0000078	Gh_A05G1594	-1.555	-1.492	Zm00001d028399	-1.036	-1.214	receptor serine/threonine kinase, putative / Pathogenesis-related thaumatin superfamily protein
		Gh_A05G1594	-1.555	-1.492	Zm00001d022637	-3.243	-5.228
		Gh_A11G0393	-2.276	-4.032	Zm00001d028399	-1.036	-1.214
		Gh_A11G0393	-2.276	-4.032	Zm00001d022637	-3.243	-5.228
		Gh_D11G0457	-2.588	-3.154	Zm00001d028399	-1.036	-1.214
		Gh_D11G0457	-2.588	-3.154	Zm00001d022637	-3.243	-5.228
Transmembrane transport	OG0000206	Gh_A03G0461	-2.416	-1.628	Zm00001d016590	4.558	4.671	Nodulin MtN3 family protein / senescence-associated gene 29
		Gh_A03G0461	-2.416	-1.628	Zm00001d050577	6.343	6.158
	OG0000725	Gh_D05G2623	1.146	1.242	Zm00001d053049	2.216	1.768	ATP-binding casette family G25
	OG0000798	Gh_A05G1449	-1.423	-1.377	Zm00001d013810	-1.246	-1.693	MATE efflux family protein
	OG0001026	Gh_D01G0358	-2.071	-1.003	Zm00001d051415	4.447	4.36	mechanosensitive channel of small conductance-like
		Gh_D01G0358	-2.071	-1.003	Zm00001d017539	1.141	1.25
		Gh_A04G0372	1.019	1.361	Zm00001d051415	4.447	4.36
		Gh_A04G0372	1.019	1.361	Zm00001d017539	1.141	1.25
	OG0001126	Gh_A10G1468	-3.503	-2.894	Zm00001d009071	-1.414	-1.342	Nodulin MtN3 family protein
		Gh_D02G0542	-2.32	-2.009	Zm00001d009071	-1.414	-1.342
		Gh_D10G1709	-1.647	-1.454	Zm00001d009071	-1.414	-1.342
	OG0001160	Gh_A06G1984	-1.505	-1.073	Zm00001d013571	-1.323	-1.297	SBP (S-ribonuclease binding protein) family protein
	OG0001329	Gh_A01G1675	5.072	4.228	Zm00001d035115	1.833	1.538	MATE efflux family protein
	OG0006338	Gh_D11G0733	-2.814	-1.771	Zm00001d052261	1.867	1.221	NOD26-like intrinsic protein
		Gh_D11G0733	-2.814	-1.771	Zm00001d018037	3.842	2.057
	OG0009451	Gh_D06G1724	1.144	1.201	Zm00001d034035	1.573	1.083	oligopeptide transporter
UDP-glucosyltransferase activity	OG0000139	Gh_A07G0920	-4.044	-3.478	Zm00001d019254	-1.006	-1.092	UDP-Glycosyltransferase superfamily protein
		Gh_A07G0920	-4.044	-3.478	Zm00001d019259	-3.328	-2.978
		Gh_A07G0920	-4.044	-3.478	Zm00001d019265	4.503	3.072
		Gh_D07G0996	-4.329	-3.774	Zm00001d019254	-1.006	-1.092
		Gh_D07G0996	-4.329	-3.774	Zm00001d019259	-3.328	-2.978
		Gh_D07G0996	-4.329	-3.774	Zm00001d019265	4.503	3.072
	OG0000267	Gh_A12G2646	-1.649	-1.507	Zm00001d049925	-1.465	-2.644	UDP-Glycosyltransferase superfamily protein
	OG0000946	Gh_A12G0967	1.961	2.168	Zm00001d002579	1.713	1.771	Protein DUF604
		Gh_D11G0962	1.665	2.003	Zm00001d002579	1.713	1.771
Function unknown	OG0000328	Gh_A03G1087	3.621	1.728	Zm00001d003962	-1.113	-1.011	Protein of unknown function
		Gh_A03G1087	3.621	1.728	Zm00001d040210	-1.452	-2.39
	OG0000890	Gh_D05G1372	-1.074	-1.008	Zm00001d024403	3.962	3.755	N/A
	OG0001012	Gh_D03G0406	2.027	1.507	Zm00001d005657	-4.435	-4.884	Protein of unknown function (DUF581)
		Gh_D03G0406	2.027	1.507	Zm00001d050285	-2.912	-3.185
	OG0001808	Gh_D03G0192	-2.051	-4.929	Zm00001d047231	2.71	1.717	N/A
	OG0002188	Gh_A13G1763	-1.369	-2.995	Zm00001d039648	-3.725	-4.297	N/A
		Gh_A08G2125	-1.634	-2.032	Zm00001d037631	-2.055	-2.204
		Gh_A08G2125	-1.634	-2.032	Zm00001d039648	-3.725	-4.297
		Gh_A10G0688	-1.255	-2.505	Zm00001d037631	-2.055	-2.204
		Gh_A10G0688	-1.255	-2.505	Zm00001d039648	-3.725	-4.297
		Gh_D08G2497	-1.396	-1.84	Zm00001d037631	-2.055	-2.204
		Gh_D08G2497	-1.396	-1.84	Zm00001d039648	-3.725	-4.297
		Gh_D10G0699	-2.822	-4.502	Zm00001d037631	-2.055	-2.204
		Gh_D10G0699	-2.822	-4.502	Zm00001d039648	-3.725	-4.297
	OG0002469	Gh_A12G1274	-2.088	-4.007	Zm00001d043444	-1.752	-2.183	Protein of unknown function (DUF506)
		Gh_D09G0706	-3.607	-5.548	Zm00001d043444	-1.752	-2.183
		Gh_D10G0238	-1.424	-2.317	Zm00001d043444	-1.752	-2.183
		Gh_D12G1396	-1.964	-3.526	Zm00001d043444	-1.752	-2.183
		Gh_Sca005409G01	-3.589	-5.953	Zm00001d043444	-1.752	-2.183
		Gh_Sca006201G01	-1.298	-2.842	Zm00001d043444	-1.752	-2.183
	OG0003230	Gh_D03G0401	-1.685	-1.804	Zm00001d010039	2.209	2.119	N/A
	OG0003340	Gh_D07G0940	1.825	3.3	Zm00001d011041	2.265	1.859	Protein of unknown function (DUF1635)
		Gh_D07G0940	1.825	3.3	Zm00001d035603	1.063	1.046
	OG0003577	Gh_A07G0036	-1.135	-1.191	Zm00001d009525	-1.283	-1.359	N/A
	OG0003661	Gh_D09G0670	-1.728	-1.328	Zm00001d006489	-1.126	-1.055	Protein of unknown function, DUF584
	OG0005477	Gh_A02G1750	-1.817	-1.588	Zm00001d053406	1.267	1.282	N/A
	OG0006380	Gh_A10G1995	2.449	2.362	Zm00001d028576	1.481	1.655	Protein of unknown function (DUF604)
		Gh_D10G2303	4.427	5.034	Zm00001d028576	1.481	1.655
	OG0008936	Gh_A03G1236	1.908	2.78	Zm00001d032307	4.503	5.026	N/A
		Gh_D02G1673	4.433	5.808	Zm00001d032307	4.503	5.026
